# Supplementary material for: Pan-cancer multi-omics analysis of PTBP1 reveals it as an inflammatory, progressive and prognostic marker in glioma
Source: Sci Rep. 2024 Jun 25;14:14584. doi: 10.1038/s41598-024-64979-5 (PMC11199703; doi:10.1038/s41598-024-64979-5)
Supplement: Supplementary file 2 — Supplementary Information 2. [file 41598_2024_64979_MOESM2_ESM.xlsx]

## Sheet: OS
TCGA-GBM	TCGA-19-1787-01	6.6405	385	1
TCGA-GBMLGG	TCGA-19-1787-01	6.6405	385	1
TCGA-LGG	TCGA-S9-A7J2-01	6.3329	62	0
TCGA-GBMLGG	TCGA-S9-A7J2-01	6.3329	62	0
TCGA-CESC	TCGA-EK-A2RE-01	7.1356	57	0
TCGA-LUAD	TCGA-44-6778-01	6.9859	1864	0
TCGA-LAML	TCGA-AB-2863-03	7.3625	31	1
TCGA-BRCA	TCGA-C8-A1HL-01	7.5073	317	0
TCGA-BRCA	TCGA-EW-A2FS-01	6.9939	1604	0
TCGA-CESC	TCGA-IR-A3L7-01	7.5636	4483	0
TCGA-LUAD	TCGA-05-4420-01	6.7556	912	0
TCGA-ESCA	TCGA-R6-A8WC-01	8.0492	70	0
TCGA-STES	TCGA-R6-A8WC-01	8.0492	70	0
TCGA-SARC	TCGA-DX-A3U8-01	6.8145	138	1
TCGA-KIRP	TCGA-GL-8500-01	6.3849	841	0
TCGA-KIPAN	TCGA-GL-8500-01	6.3849	841	0
TCGA-PRAD	TCGA-EJ-7125-01	6.8416	2850	0
TCGA-STAD	TCGA-IN-7808-01	7.0185	105	1
TCGA-STES	TCGA-IN-7808-01	7.0185	105	1
TCGA-ESCA	TCGA-L5-A4OH-01	8.1686	992	0
TCGA-STES	TCGA-L5-A4OH-01	8.1686	992	0
TCGA-KIRP	TCGA-B9-A8YH-01	7.0576	532	0
TCGA-KIPAN	TCGA-B9-A8YH-01	7.0576	532	0
TCGA-LGG	TCGA-E1-A7YI-01	7.3026	111	1
TCGA-GBMLGG	TCGA-E1-A7YI-01	7.3026	111	1
TCGA-SARC	TCGA-PC-A5DM-01	6.851	193	1
TCGA-STAD	TCGA-BR-A4QL-01	6.4927	491	1
TCGA-STES	TCGA-BR-A4QL-01	6.4927	491	1
TCGA-PRAD	TCGA-CH-5751-01	7.3403	1065	0
TCGA-BRCA	TCGA-A2-A3XX-01	7.1987	1439	1
TCGA-HNSC	TCGA-DQ-5624-01	7.1625	1778	0
TCGA-PRAD	TCGA-KK-A7B3-01	7.0548	899	0
TCGA-HNSC	TCGA-DQ-7591-01	6.9011	622	0
TCGA-GBM	TCGA-06-5412-01	6.1451	138	1
TCGA-GBMLGG	TCGA-06-5412-01	6.1451	138	1
TCGA-KIRC	TCGA-BP-4989-01	6.1237	118	0
TCGA-KIPAN	TCGA-BP-4989-01	6.1237	118	0
TCGA-PRAD	TCGA-EJ-8468-01	6.8998	2347	0
TCGA-KIRC	TCGA-CZ-5459-01	6.4666	1683	0
TCGA-KIPAN	TCGA-CZ-5459-01	6.4666	1683	0
TCGA-COAD	TCGA-D5-5538-01	7.4923	1661	1
TCGA-COADREAD	TCGA-D5-5538-01	7.4923	1661	1
TCGA-LUSC	TCGA-56-8305-01	7.2268	105	0
TCGA-THYM	TCGA-4X-A9FA-01	6.8895	392	0
TCGA-LIHC	TCGA-DD-AAW0-01	6.259	2015	0
TCGA-COAD	TCGA-AA-3511-01	7.3653	212	0
TCGA-COADREAD	TCGA-AA-3511-01	7.3653	212	0
TCGA-BRCA	TCGA-Z7-A8R5-01	6.5912	3287	0
TCGA-LUSC	TCGA-39-5031-01	7.2015	1841	1
TCGA-PRAD	TCGA-ZG-A8QW-01	6.6468	94	0
TCGA-LGG	TCGA-DU-7302-01	6.0753	1834	0
TCGA-GBMLGG	TCGA-DU-7302-01	6.0753	1834	0
TCGA-THCA	TCGA-DJ-A3UX-01	6.9176	345	0
TCGA-MESO	TCGA-ZN-A9VQ-01	7.6709	499	0
TCGA-READ	TCGA-EI-6512-01	8.1905	538	0
TCGA-COADREAD	TCGA-EI-6512-01	8.1905	538	0
TCGA-PRAD	TCGA-J4-A83K-01	6.8065	328	0
TCGA-SKCM-M	TCGA-EE-A17X-06	8.0663	907	1
TCGA-SKCM	TCGA-EE-A17X-06	8.0663	907	1
TCGA-LIHC	TCGA-DD-AACA-01	6.7088	2301	0
TCGA-SKCM-M	TCGA-D3-A8GD-06	6.72	718	0
TCGA-SKCM	TCGA-D3-A8GD-06	6.72	718	0
TCGA-OV	TCGA-13-1485-01	6.8167	629	1
TCGA-COAD	TCGA-QG-A5YX-01	7.1538	1003	0
TCGA-COADREAD	TCGA-QG-A5YX-01	7.1538	1003	0
TCGA-PRAD	TCGA-ZG-A9MC-01	6.9559	455	0
TCGA-LGG	TCGA-DU-A7TI-01	6.3296	1183	1
TCGA-GBMLGG	TCGA-DU-A7TI-01	6.3296	1183	1
TCGA-KIRC	TCGA-A3-3335-01	5.8958	1886	0
TCGA-KIPAN	TCGA-A3-3335-01	5.8958	1886	0
TCGA-STAD	TCGA-BR-8372-01	8.1239	951	0
TCGA-STES	TCGA-BR-8372-01	8.1239	951	0
TCGA-PRAD	TCGA-HC-7742-01	7.1019	938	0
TCGA-LUAD	TCGA-64-1679-01	7.6066	2488	0
TCGA-HNSC	TCGA-CV-5976-01	7.5996	1478	0
TCGA-OV	TCGA-25-1315-01	7.015	1583	1
TCGA-TGCT	TCGA-2G-AAFZ-01	8.026	1353	0
TCGA-ESCA	TCGA-LN-A4MQ-01	7.8729	375	0
TCGA-STES	TCGA-LN-A4MQ-01	7.8729	375	0
TCGA-HNSC	TCGA-CV-6948-01	7.7504	1289	1
TCGA-LIHC	TCGA-K7-AAU7-01	7.0482	359	0
TCGA-KIRC	TCGA-CJ-6028-01	6.8502	1625	1
TCGA-KIPAN	TCGA-CJ-6028-01	6.8502	1625	1
TCGA-BRCA	TCGA-B6-A0RL-01	7.3359	2469	1
TCGA-KIRC	TCGA-CZ-5456-01	6.3563	2422	0
TCGA-KIPAN	TCGA-CZ-5456-01	6.3563	2422	0
TCGA-THCA	TCGA-EL-A3D0-01	6.5506	4254	0
TCGA-THCA	TCGA-EM-A22Q-01	5.7159	433	0
TCGA-LUAD	TCGA-49-6744-01	6.6872	1683	0
TCGA-ESCA	TCGA-L5-A4ON-01	7.9636	558	1
TCGA-STES	TCGA-L5-A4ON-01	7.9636	558	1
TCGA-SKCM-M	TCGA-FS-A1ZF-06	7.0676	470	1
TCGA-SKCM	TCGA-FS-A1ZF-06	7.0676	470	1
TCGA-MESO	TCGA-ZN-A9VU-01	7.1675	977	0
TCGA-PAAD	TCGA-Q3-A5QY-01	6.6776	416	0
TCGA-UCEC	TCGA-AJ-A3BI-01	6.515	575	0
TCGA-PCPG	TCGA-W2-A7UY-01	6.134	450	0
TCGA-THCA	TCGA-E3-A3E2-01	6.8297	1922	0
TCGA-PAAD	TCGA-FB-A545-01	7.4454	732	1
TCGA-COAD	TCGA-G4-6320-01	7.4106	804	0
TCGA-COADREAD	TCGA-G4-6320-01	7.4106	804	0
TCGA-SKCM-P	TCGA-EB-A41A-01	6.7936	262	0
TCGA-SKCM	TCGA-EB-A41A-01	6.7936	262	0
TCGA-LUAD	TCGA-55-6982-01	6.82	995	1
TCGA-LIHC	TCGA-RC-A7SH-01	7.0532	468	0
TCGA-LIHC	TCGA-CC-A3MA-01	7.0434	303	1
TCGA-LIHC	TCGA-RC-A7SB-01	5.8851	588	0
TCGA-COAD	TCGA-CM-6164-01	7.6447	883	0
TCGA-COADREAD	TCGA-CM-6164-01	7.6447	883	0
TCGA-THCA	TCGA-ET-A3BW-01	7.2769	1419	0
TCGA-OV	TCGA-09-0369-01	6.9514	1082	1
TCGA-BRCA	TCGA-E2-A2P6-01	7.2449	1051	0
TCGA-UVM	TCGA-VD-A8KF-01	7.0762	40	1
TCGA-THCA	TCGA-EL-A4JZ-01	6.9974	1856	0
TCGA-PRAD	TCGA-M7-A722-01	5.704	1060	0
TCGA-HNSC	TCGA-CV-A6K0-01	7.2057	606	0
TCGA-OV	TCGA-24-1419-01	7.2695	239	0
TCGA-TGCT	TCGA-S6-A8JY-01	7.9953	278	0
TCGA-BRCA	TCGA-AO-A1KT-01	6.7031	541	0
TCGA-UCS	TCGA-N9-A4Q1-01	6.813	2043	1
TCGA-GBM	TCGA-12-5299-01	6.4022	98	1
TCGA-GBMLGG	TCGA-12-5299-01	6.4022	98	1
TCGA-OV	TCGA-29-1761-01	5.691	528	1
TCGA-THCA	TCGA-BJ-A0ZJ-01	6.9615	1280	0
TCGA-LGG	TCGA-P5-A5EX-01	5.9678	243	0
TCGA-GBMLGG	TCGA-P5-A5EX-01	5.9678	243	0
TCGA-THCA	TCGA-DJ-A4V2-01	6.9447	95	0
TCGA-LGG	TCGA-HT-8563-01	6.4497	860	0
TCGA-GBMLGG	TCGA-HT-8563-01	6.4497	860	0
TCGA-THCA	TCGA-J8-A3O2-01	6.6689	342	0
TCGA-BRCA	TCGA-E9-A3HO-01	7.4165	1158	0
TCGA-COAD	TCGA-A6-A567-01	7.072	1881	1
TCGA-COADREAD	TCGA-A6-A567-01	7.072	1881	1
TCGA-LUSC	TCGA-58-A46N-01	7.6971	910	0
TCGA-SKCM-M	TCGA-D3-A3ML-06	7.1094	422	1
TCGA-SKCM	TCGA-D3-A3ML-06	7.1094	422	1
TCGA-STAD	TCGA-CG-4466-01	7.1733	577	0
TCGA-STES	TCGA-CG-4466-01	7.1733	577	0
TCGA-KIRC	TCGA-A3-3383-01	6.3507	861	0
TCGA-KIPAN	TCGA-A3-3383-01	6.3507	861	0
TCGA-BRCA	TCGA-D8-A1XJ-01	7.6559	664	0
TCGA-SARC	TCGA-VT-A80J-01	7.449	796	0
TCGA-CESC	TCGA-Q1-A73Q-01	7.5455	284	0
TCGA-KIRP	TCGA-BQ-5880-01	5.8413	1314	1
TCGA-KIPAN	TCGA-BQ-5880-01	5.8413	1314	1
TCGA-SKCM-M	TCGA-EE-A2GB-06	7.4836	1803	0
TCGA-SKCM	TCGA-EE-A2GB-06	7.4836	1803	0
TCGA-OV	TCGA-24-1845-01	6.2675	116	0
TCGA-THYM	TCGA-ZB-A96L-01	8.7136	1529	0
TCGA-HNSC	TCGA-BA-6870-01	7.0468	451	1
TCGA-LUAD	TCGA-73-4666-01	7.3826	800	0
TCGA-BLCA	TCGA-MV-A51V-01	6.818	410	0
TCGA-LUSC	TCGA-77-A5G6-01	7.7653	678	1
TCGA-KIRP	TCGA-5P-A9K4-01	7.0365	2184	0
TCGA-KIPAN	TCGA-5P-A9K4-01	7.0365	2184	0
TCGA-UVM	TCGA-VD-A8KE-01	6.7046	821	0
TCGA-LUSC	TCGA-56-A4BX-01	7.7245	405	0
TCGA-LUSC	TCGA-34-7107-01	8.1372	34	1
TCGA-THCA	TCGA-BJ-A290-01	7.1819	919	0
TCGA-HNSC	TCGA-CV-6955-01	6.731	334	1
TCGA-HNSC	TCGA-P3-A5Q6-01	6.871	480	1
TCGA-LGG	TCGA-FG-A60K-01	6.0301	542	0
TCGA-GBMLGG	TCGA-FG-A60K-01	6.0301	542	0
TCGA-STAD	TCGA-D7-A4Z0-01	6.674	449	0
TCGA-STES	TCGA-D7-A4Z0-01	6.674	449	0
TCGA-OV	TCGA-24-2293-01	7.1738	506	1
TCGA-HNSC	TCGA-QK-A64Z-01	7.6233	641	1
TCGA-BRCA	TCGA-AC-A2FK-01	7.1072	2650	0
TCGA-PRAD	TCGA-VP-A879-01	6.9663	728	1
TCGA-OV	TCGA-29-A5NZ-01	8.2489	1088	1
TCGA-PRAD	TCGA-HC-8265-01	5.4501	483	0
TCGA-LUSC	TCGA-37-4129-01	6.0193	242	0
TCGA-LIHC	TCGA-DD-AAVZ-01	6.4998	1900	0
TCGA-THCA	TCGA-DJ-A13R-01	5.4353	565	0
TCGA-BRCA	TCGA-E9-A1R4-01	7.541	186	0
TCGA-MESO	TCGA-3U-A98F-01	7.6387	536	1
TCGA-CESC	TCGA-C5-A1MF-01	5.6573	1617	0
TCGA-LUSC	TCGA-77-8145-01	7.5775	212	1
TCGA-BRCA	TCGA-LL-A740-01	6.9865	441	0
TCGA-READ	TCGA-F5-6863-01	7.5376	361	1
TCGA-COADREAD	TCGA-F5-6863-01	7.5376	361	1
TCGA-GBM	TCGA-06-2565-01	7.3609	506	1
TCGA-GBMLGG	TCGA-06-2565-01	7.3609	506	1
TCGA-LUSC	TCGA-33-AASD-01	6.9694	3376	1
TCGA-THCA	TCGA-ET-A3BS-01	6.1211	176	0
TCGA-BRCA	TCGA-BH-A0BZ-01	7.4368	2255	0
TCGA-LUAD	TCGA-MN-A4N1-01	7.3625	827	0
TCGA-HNSC	TCGA-IQ-A61O-01	6.5309	421	1
TCGA-LUSC	TCGA-92-8063-01	7.3472	122	0
TCGA-LUAD	TCGA-55-7911-01	6.9574	537	0
TCGA-LIHC	TCGA-ED-A627-01	6.3311	423	0
TCGA-UCS	TCGA-N6-A4VC-01	7.3554	597	1
TCGA-LUSC	TCGA-39-5028-01	6.5847	52	1
TCGA-BRCA	TCGA-C8-A3M8-01	7.5964	394	0
TCGA-THCA	TCGA-BJ-A0ZF-01	6.6721	1217	0
TCGA-BRCA	TCGA-BH-A0BM-01	6.7173	1876	0
TCGA-LAML	TCGA-AB-2914-03	7.3567	792	0
TCGA-SKCM-M	TCGA-ER-A19S-06	6.6497	1505	0
TCGA-SKCM	TCGA-ER-A19S-06	6.6497	1505	0
TCGA-COAD	TCGA-DM-A0X9-01	7.2059	3641	0
TCGA-COADREAD	TCGA-DM-A0X9-01	7.2059	3641	0
TCGA-COAD	TCGA-AY-A69D-01	8.3919	543	0
TCGA-COADREAD	TCGA-AY-A69D-01	8.3919	543	0
TCGA-BRCA	TCGA-AN-A0XW-01	7.246	170	0
TCGA-LUAD	TCGA-55-A4DG-01	6.5179	608	0
TCGA-PCPG	TCGA-RW-A684-01	6.3595	32	0
TCGA-THCA	TCGA-BJ-A45C-01	7.0069	243	1
TCGA-THCA	TCGA-ET-A2N4-01	6.9741	81	0
TCGA-LUSC	TCGA-58-A46J-01	7.4816	2589	0
TCGA-SKCM-M	TCGA-EE-A3AB-06	6.8333	3733	0
TCGA-SKCM	TCGA-EE-A3AB-06	6.8333	3733	0
TCGA-OV	TCGA-24-1426-01	5.8485	163	0
TCGA-OV	TCGA-24-1551-01	7.071	1579	1
TCGA-GBM	TCGA-06-2561-01	6.2854	537	1
TCGA-GBMLGG	TCGA-06-2561-01	6.2854	537	1
TCGA-PRAD	TCGA-KK-A8I5-01	6.7911	3096	0
TCGA-STAD	TCGA-IN-8663-01	8.3331	103	1
TCGA-STES	TCGA-IN-8663-01	8.3331	103	1
TCGA-LIHC	TCGA-DD-AAVV-01	6.4271	2455	0
TCGA-CESC	TCGA-ZJ-A8QQ-01	7.4054	2056	0
TCGA-LUSC	TCGA-37-4133-01	5.4406	238	0
TCGA-LUSC	TCGA-77-8146-01	7.0462	3189	0
TCGA-TGCT	TCGA-2G-AAHN-01	7.5506	6445	0
TCGA-LUAD	TCGA-L9-A5IP-01	7.2538	58	1
TCGA-KIRC	TCGA-CJ-5672-01	6.6487	2190	1
TCGA-KIPAN	TCGA-CJ-5672-01	6.6487	2190	1
TCGA-LUAD	TCGA-73-4662-01	7.1808	2515	0
TCGA-MESO	TCGA-3U-A98I-01	7.23	860	1
TCGA-HNSC	TCGA-CQ-5327-01	7.2623	1660	0
TCGA-BRCA	TCGA-E2-A1LL-01	7.6237	1309	0
TCGA-BLCA	TCGA-FD-A3SR-01	7.6265	602	1
TCGA-PRAD	TCGA-KK-A8II-01	7.0839	3467	1
TCGA-OV	TCGA-24-1923-01	6.4764	690	1
TCGA-BRCA	TCGA-BH-A18K-01	7.1665	2763	1
TCGA-BRCA	TCGA-BH-A28O-01	7.0791	1120	0
TCGA-LUAD	TCGA-55-6712-01	6.756	171	1
TCGA-SKCM-P	TCGA-XV-AAZW-01	6.9177	393	1
TCGA-SKCM	TCGA-XV-AAZW-01	6.9177	393	1
TCGA-PAAD	TCGA-F2-7276-01	6.9153	216	1
TCGA-THCA	TCGA-BJ-A0Z2-01	7.0373	1514	0
TCGA-BLCA	TCGA-DK-A6B0-01	6.8714	2330	0
TCGA-LUAD	TCGA-97-7553-01	6.9218	1870	0
TCGA-THCA	TCGA-ET-A2N0-01	5.9011	1600	0
TCGA-PAAD	TCGA-FB-A7DR-01	6.9523	353	1
TCGA-SKCM-M	TCGA-D3-A5GR-06	6.8119	5424	0
TCGA-SKCM	TCGA-D3-A5GR-06	6.8119	5424	0
TCGA-PAAD	TCGA-YB-A89D-01	7.1131	350	0
TCGA-PRAD	TCGA-CH-5752-01	7.1932	943	0
TCGA-LUSC	TCGA-77-7142-01	7.4666	2227	0
TCGA-THCA	TCGA-KS-A4I1-01	7.3268	812	0
TCGA-LUSC	TCGA-60-2719-01	8.1615	1297	0
TCGA-ESCA	TCGA-VR-A8Q7-01	7.5966	1590	0
TCGA-STES	TCGA-VR-A8Q7-01	7.5966	1590	0
TCGA-BRCA	TCGA-A7-A4SC-01	7.3661	446	0
TCGA-BLCA	TCGA-FD-A5BS-01	5.8136	1639	0
TCGA-KIRP	TCGA-J7-6720-01	6.5962	388	0
TCGA-KIPAN	TCGA-J7-6720-01	6.5962	388	0
TCGA-BRCA	TCGA-E9-A24A-01	7.2675	747	0
TCGA-LUAD	TCGA-49-AARE-01	7.2525	1229	1
TCGA-LIHC	TCGA-BC-4073-01	7.0174	849	0
TCGA-BRCA	TCGA-AC-A6IV-01	7.2628	568	0
TCGA-BLCA	TCGA-DK-A1AD-01	7.0127	3420	0
TCGA-BRCA	TCGA-B6-A400-01	7.5074	215	0
TCGA-THCA	TCGA-EM-A2OW-01	6.2547	1227	0
TCGA-BLCA	TCGA-XF-AAMQ-01	7.6576	2177	0
TCGA-THCA	TCGA-EM-A2OZ-01	6.8395	1033	0
TCGA-PCPG	TCGA-WB-A816-01	6.3395	1254	0
TCGA-THCA	TCGA-EM-A1CS-01	7.6469	817	0
TCGA-KIRC	TCGA-B0-5075-01	6.5433	637	1
TCGA-KIPAN	TCGA-B0-5075-01	6.5433	637	1
TCGA-SKCM-M	TCGA-W3-AA1R-06	7.1455	3379	1
TCGA-SKCM	TCGA-W3-AA1R-06	7.1455	3379	1
TCGA-HNSC	TCGA-P3-A6T0-01	7.5089	578	0
TCGA-OV	TCGA-13-0899-01	6.2216	2012	1
TCGA-COAD	TCGA-AY-A8YK-01	7.5571	573	0
TCGA-COADREAD	TCGA-AY-A8YK-01	7.5571	573	0
TCGA-LIHC	TCGA-QA-A7B7-01	6.9864	94	0
TCGA-SKCM-M	TCGA-DA-A1IC-06	7.0019	2071	1
TCGA-SKCM	TCGA-DA-A1IC-06	7.0019	2071	1
TCGA-UCEC	TCGA-A5-AB3J-01	6.8515	512	0
TCGA-LUAD	TCGA-50-8460-01	6.4437	829	0
TCGA-UCEC	TCGA-PG-A917-01	7.1757	212	0
TCGA-PAAD	TCGA-IB-7889-01	6.0768	481	1
TCGA-THCA	TCGA-EM-A3SY-01	6.0628	411	0
TCGA-PRAD	TCGA-ZG-A9L1-01	7.4648	1302	0
TCGA-HNSC	TCGA-CN-5361-01	7.2647	2120	1
TCGA-LAML	TCGA-AB-2967-03	6.9849	1035	0
TCGA-CESC	TCGA-EX-A3L1-01	7.5012	463	0
TCGA-LUAD	TCGA-50-5933-01	7.6222	2393	1
TCGA-BLCA	TCGA-FT-A3EE-01	7.1295	99	1
TCGA-SARC	TCGA-IE-A4EH-01	6.7626	819	0
TCGA-THYM	TCGA-ZB-A96E-01	7.4736	1819	0
TCGA-LUSC	TCGA-43-3394-01	6.3169	1190	1
TCGA-BLCA	TCGA-ZF-AA4T-01	7.7499	599	1
TCGA-MESO	TCGA-MQ-A6BQ-01	6.8248	2359	0
TCGA-BRCA	TCGA-E2-A1LH-01	6.5227	3247	0
TCGA-THCA	TCGA-ET-A39P-01	6.7116	2900	0
TCGA-OV	TCGA-29-1769-01	6.4011	699	0
TCGA-PAAD	TCGA-IB-7890-01	7.2642	598	1
TCGA-LUSC	TCGA-18-3409-01	6.7262	3747	0
TCGA-KIRC	TCGA-CJ-4899-01	7.4282	1528	0
TCGA-KIPAN	TCGA-CJ-4899-01	7.4282	1528	0
TCGA-BLCA	TCGA-E7-A3X6-01	7.2736	904	1
TCGA-COAD	TCGA-5M-AAT4-01	7.453	49	1
TCGA-COADREAD	TCGA-5M-AAT4-01	7.453	49	1
TCGA-OV	TCGA-24-1474-01	7.0666	676	1
TCGA-MESO	TCGA-3H-AB3U-01	6.7992	826	1
TCGA-ESCA	TCGA-2H-A9GF-01	8.4641	784	1
TCGA-STES	TCGA-2H-A9GF-01	8.4641	784	1
TCGA-COAD	TCGA-CM-6167-01	6.8588	456	0
TCGA-COADREAD	TCGA-CM-6167-01	6.8588	456	0
TCGA-KIRC	TCGA-CW-5590-01	6.6777	1075	1
TCGA-KIPAN	TCGA-CW-5590-01	6.6777	1075	1
TCGA-HNSC	TCGA-CR-7370-01	8.0989	105	0
TCGA-KIRP	TCGA-BQ-5888-01	6.0446	403	0
TCGA-KIPAN	TCGA-BQ-5888-01	6.0446	403	0
TCGA-BRCA	TCGA-B6-A0RH-01	7.205	6456	1
TCGA-THCA	TCGA-EL-A3ZG-01	6.4889	2724	0
TCGA-THCA	TCGA-EL-A3CR-01	6.6938	233	1
TCGA-BRCA	TCGA-A8-A07W-01	8.1343	304	0
TCGA-PCPG	TCGA-QR-A6GY-01	7.0779	32	0
TCGA-UVM	TCGA-VD-A8KA-01	7.2238	1178	0
TCGA-PRAD	TCGA-YL-A8HJ-01	6.7677	1611	0
TCGA-LUAD	TCGA-44-6774-01	6.7274	658	0
TCGA-BLCA	TCGA-GU-A762-01	7.1398	232	1
TCGA-KIRP	TCGA-2Z-A9JK-01	6.6439	1186	0
TCGA-KIPAN	TCGA-2Z-A9JK-01	6.6439	1186	0
TCGA-LGG	TCGA-CS-5397-01	6.3138	194	1
TCGA-GBMLGG	TCGA-CS-5397-01	6.3138	194	1
TCGA-UCEC	TCGA-AX-A3G8-01	5.9468	36	0
TCGA-ACC	TCGA-OR-A5K3-01	5.5668	3465	0
TCGA-LAML	TCGA-AB-2892-03	6.9302	943	0
TCGA-KIRC	TCGA-CZ-4860-01	6.234	206	1
TCGA-KIPAN	TCGA-CZ-4860-01	6.234	206	1
TCGA-THCA	TCGA-BJ-A28S-01	7.14	640	0
TCGA-LAML	TCGA-AB-2862-03	7.8644	1430	0
TCGA-OV	TCGA-09-2048-01	6.3254	138	1
TCGA-LGG	TCGA-E1-5322-01	6.5634	3978	1
TCGA-GBMLGG	TCGA-E1-5322-01	6.5634	3978	1
TCGA-LUAD	TCGA-73-4670-01	6.962	131	0
TCGA-PRAD	TCGA-ZG-A9L5-01	7.5425	908	0
TCGA-HNSC	TCGA-CN-5365-01	6.5362	351	1
TCGA-HNSC	TCGA-MT-A7BN-01	6.7234	469	0
TCGA-LAML	TCGA-AB-2976-03	6.7934	915	1
TCGA-KIRC	TCGA-B0-5700-01	6.9196	1790	0
TCGA-KIPAN	TCGA-B0-5700-01	6.9196	1790	0
TCGA-KIRC	TCGA-B0-4847-01	6.4094	793	1
TCGA-KIPAN	TCGA-B0-4847-01	6.4094	793	1
TCGA-SKCM-P	TCGA-BF-A5ER-01	7.333	327	0
TCGA-SKCM	TCGA-BF-A5ER-01	7.333	327	0
TCGA-CESC	TCGA-JW-A5VI-01	7.3806	747	0
TCGA-PRAD	TCGA-XK-AAJT-01	6.1542	1434	0
TCGA-LUSC	TCGA-56-A4BW-01	7.2736	585	0
TCGA-LUSC	TCGA-56-8308-01	7.0433	517	0
TCGA-HNSC	TCGA-CV-6956-01	7.0892	217	1
TCGA-HNSC	TCGA-DQ-5631-01	7.9971	548	1
TCGA-LUSC	TCGA-85-8353-01	7.4555	94	1
TCGA-OV	TCGA-36-1580-01	6.5364	737	1
TCGA-STAD	TCGA-BR-7716-01	7.8634	1210	0
TCGA-STES	TCGA-BR-7716-01	7.8634	1210	0
TCGA-LIHC	TCGA-HP-A5N0-01	5.9957	1147	1
TCGA-HNSC	TCGA-CR-7369-01	7.8522	1090	1
TCGA-LUAD	TCGA-55-A48Z-01	7.3446	651	0
TCGA-LGG	TCGA-HT-8558-01	4.4121	418	0
TCGA-GBMLGG	TCGA-HT-8558-01	4.4121	418	0
TCGA-BLCA	TCGA-FD-A43S-01	6.3567	455	0
TCGA-UCEC	TCGA-5B-A90C-01	7.6434	1202	0
TCGA-BRCA	TCGA-B6-A0X7-01	7.171	1781	1
TCGA-BRCA	TCGA-EW-A1P0-01	7.5885	1251	0
TCGA-THCA	TCGA-DE-A7U5-01	6.7576	84	0
TCGA-SKCM-M	TCGA-D3-A5GU-06	6.8102	3808	0
TCGA-SKCM	TCGA-D3-A5GU-06	6.8102	3808	0
TCGA-BLCA	TCGA-XF-A8HE-01	7.4651	3817	0
TCGA-HNSC	TCGA-QK-A6IG-01	7.6672	222	1
TCGA-LUSC	TCGA-22-4604-01	7.0189	399	1
TCGA-BLCA	TCGA-BT-A42F-01	6.7291	864	0
TCGA-OV	TCGA-61-1900-01	7.2157	176	0
TCGA-KIRP	TCGA-Y8-A894-01	7.6189	567	0
TCGA-KIPAN	TCGA-Y8-A894-01	7.6189	567	0
TCGA-LGG	TCGA-S9-A6U8-01	6.2132	2988	1
TCGA-GBMLGG	TCGA-S9-A6U8-01	6.2132	2988	1
TCGA-READ	TCGA-DC-5337-01	6.7609	792	0
TCGA-COADREAD	TCGA-DC-5337-01	6.7609	792	0
TCGA-HNSC	TCGA-CV-7261-01	7.4521	1512	0
TCGA-THCA	TCGA-BJ-A192-01	6.3163	1349	0
TCGA-KICH	TCGA-KL-8345-01	6.4927	1665	0
TCGA-KIPAN	TCGA-KL-8345-01	6.4927	1665	0
TCGA-KIRC	TCGA-BP-4998-01	7.1171	932	0
TCGA-KIPAN	TCGA-BP-4998-01	7.1171	932	0
TCGA-CHOL	TCGA-ZH-A8Y5-01	7.5526	1229	0
TCGA-THCA	TCGA-EL-A3T9-01	6.6298	174	1
TCGA-ACC	TCGA-OR-A5J2-01	6.7807	1677	1
TCGA-HNSC	TCGA-T2-A6X2-01	7.3885	987	0
TCGA-HNSC	TCGA-CR-6492-01	7.291	479	0
TCGA-BLCA	TCGA-G2-A3IB-01	7.0906	220	1
TCGA-BRCA	TCGA-EW-A1PC-01	7.4158	187	0
TCGA-THCA	TCGA-FK-A3SB-01	7.2476	125	0
TCGA-KIRC	TCGA-CJ-5675-01	6.9658	3936	0
TCGA-KIPAN	TCGA-CJ-5675-01	6.9658	3936	0
TCGA-BLCA	TCGA-CU-A3KJ-01	7.3784	562	0
TCGA-BRCA	TCGA-A7-A0CH-01	7.0488	1079	0
TCGA-COAD	TCGA-CM-6168-01	7.6534	395	0
TCGA-COADREAD	TCGA-CM-6168-01	7.6534	395	0
TCGA-HNSC	TCGA-QK-A6IF-01	7.4362	704	0
TCGA-BRCA	TCGA-E9-A2JS-01	6.9376	904	1
TCGA-CESC	TCGA-EA-A1QT-01	7.5047	1243	0
TCGA-BRCA	TCGA-A2-A1G6-01	7.2879	501	0
TCGA-SARC	TCGA-LI-A67I-01	6.9004	922	0
TCGA-TGCT	TCGA-W4-A7U4-01	8.0714	738	0
TCGA-THCA	TCGA-EL-A3ZL-01	6.5215	1895	0
TCGA-TGCT	TCGA-XY-A8S3-01	8.2264	843	0
TCGA-LGG	TCGA-HT-7854-01	6.1516	1201	0
TCGA-GBMLGG	TCGA-HT-7854-01	6.1516	1201	0
TCGA-LUAD	TCGA-44-A47A-01	7.4674	466	0
TCGA-BRCA	TCGA-B6-A0WV-01	7.5936	2417	1
TCGA-PCPG	TCGA-WB-A81J-01	7.0719	741	0
TCGA-TGCT	TCGA-2G-AAL5-01	7.9782	7437	0
TCGA-KIRP	TCGA-HE-7129-01	7.5772	2492	0
TCGA-KIPAN	TCGA-HE-7129-01	7.5772	2492	0
TCGA-LUAD	TCGA-05-4398-01	7.2663	1431	0
TCGA-HNSC	TCGA-HD-7753-01	7.4259	866	0
TCGA-HNSC	TCGA-BA-5559-01	7.9375	2083	1
TCGA-PRAD	TCGA-KK-A59X-01	6.6492	2535	0
TCGA-BRCA	TCGA-UL-AAZ6-01	7.1491	518	0
TCGA-BRCA	TCGA-B6-A0RG-01	7.498	2082	0
TCGA-PCPG	TCGA-SP-A6QC-01	6.2979	3491	0
TCGA-LUSC	TCGA-56-7579-01	7.0717	951	1
TCGA-LUAD	TCGA-67-3773-01	6.0199	427	0
TCGA-OV	TCGA-24-1562-01	7.1135	1384	1
TCGA-THCA	TCGA-FE-A235-01	6.8934	3571	0
TCGA-THCA	TCGA-EM-A3SU-01	5.9165	911	0
TCGA-LGG	TCGA-HT-7874-01	4.9878	1130	0
TCGA-GBMLGG	TCGA-HT-7874-01	4.9878	1130	0
TCGA-LUSC	TCGA-77-8007-01	7.4852	198	1
TCGA-SKCM-M	TCGA-FS-A1ZB-06	7.2515	1486	1
TCGA-SKCM	TCGA-FS-A1ZB-06	7.2515	1486	1
TCGA-BRCA	TCGA-A7-A0DC-01	6.8206	906	0
TCGA-OV	TCGA-24-2297-01	7.4996	1699	1
TCGA-BRCA	TCGA-A2-A0CR-01	6.4099	3283	0
TCGA-BRCA	TCGA-GM-A2DD-01	6.8231	2282	0
TCGA-LUSC	TCGA-77-7463-01	7.3708	1423	1
TCGA-LGG	TCGA-S9-A6TV-01	7.118	571	0
TCGA-GBMLGG	TCGA-S9-A6TV-01	7.118	571	0
TCGA-BRCA	TCGA-BH-A6R9-01	6.9653	160	0
TCGA-LUSC	TCGA-39-5039-01	6.7067	544	1
TCGA-CESC	TCGA-UC-A7PG-01	7.1062	370	1
TCGA-BLCA	TCGA-DK-A3IS-01	7.725	1529	0
TCGA-HNSC	TCGA-CV-6943-01	7.3755	602	1
TCGA-LUAD	TCGA-64-5781-01	6.5368	1559	0
TCGA-BRCA	TCGA-HN-A2OB-01	7.2751	1900	1
TCGA-HNSC	TCGA-CQ-7068-01	7.4569	1309	0
TCGA-LGG	TCGA-VM-A8CD-01	6.211	240	1
TCGA-GBMLGG	TCGA-VM-A8CD-01	6.211	240	1
TCGA-LUAD	TCGA-97-7552-01	6.8348	1932	0
TCGA-BRCA	TCGA-UU-A93S-01	6.8439	116	1
TCGA-SARC	TCGA-QC-AA9N-01	7.3574	537	0
TCGA-THCA	TCGA-EM-A2CJ-01	6.9037	1447	0
TCGA-COAD	TCGA-AA-3697-01	7.574	2587	0
TCGA-COADREAD	TCGA-AA-3697-01	7.574	2587	0
TCGA-LUAD	TCGA-49-AARN-01	7.0979	1135	1
TCGA-HNSC	TCGA-CV-5444-01	7.0283	2437	0
TCGA-BRCA	TCGA-AR-A24P-01	7.1457	84	0
TCGA-LUSC	TCGA-18-5595-01	8.2239	827	1
TCGA-KIRP	TCGA-SX-A7SM-01	6.9925	363	1
TCGA-KIPAN	TCGA-SX-A7SM-01	6.9925	363	1
TCGA-THCA	TCGA-DJ-A4V5-01	7.0886	1076	0
TCGA-LIHC	TCGA-DD-AAEI-01	5.7777	1531	0
TCGA-COAD	TCGA-AZ-4615-01	7.4814	1002	0
TCGA-COADREAD	TCGA-AZ-4615-01	7.4814	1002	0
TCGA-GBM	TCGA-06-0132-01	5.1571	771	1
TCGA-GBMLGG	TCGA-06-0132-01	5.1571	771	1
TCGA-ESCA	TCGA-VR-A8EO-01	8.3489	785	0
TCGA-STES	TCGA-VR-A8EO-01	8.3489	785	0
TCGA-KIRP	TCGA-HE-A5NK-01	6.5529	2228	0
TCGA-KIPAN	TCGA-HE-A5NK-01	6.5529	2228	0
TCGA-THCA	TCGA-ET-A25G-01	6.7607	2492	0
TCGA-HNSC	TCGA-CR-7395-01	7.2768	930	0
TCGA-STAD	TCGA-VQ-A91D-01	7.8293	356	1
TCGA-STES	TCGA-VQ-A91D-01	7.8293	356	1
TCGA-STAD	TCGA-BR-7196-01	7.5227	666	0
TCGA-STES	TCGA-BR-7196-01	7.5227	666	0
TCGA-OV	TCGA-23-1113-01	6.6443	949	1
TCGA-KIRC	TCGA-BP-4777-01	6.2246	1731	0
TCGA-KIPAN	TCGA-BP-4777-01	6.2246	1731	0
TCGA-OV	TCGA-24-2290-01	4.1867	1102	1
TCGA-THCA	TCGA-ET-A39J-01	7.1435	3227	0
TCGA-BRCA	TCGA-E9-A1N9-01	7.6511	1101	0
TCGA-BRCA	TCGA-B6-A0I9-01	7.3747	362	1
TCGA-HNSC	TCGA-CN-6022-01	7.715	281	1
TCGA-THCA	TCGA-E8-A242-01	6.313	950	0
TCGA-THCA	TCGA-DJ-A2Q5-01	6.7641	1140	0
TCGA-KIRP	TCGA-DW-7963-01	5.9286	1240	0
TCGA-KIPAN	TCGA-DW-7963-01	5.9286	1240	0
TCGA-DLBC	TCGA-FA-A7DS-01	7.8329	719	0
TCGA-BRCA	TCGA-E2-A1L9-01	7.1457	598	0
TCGA-BRCA	TCGA-AC-A23H-01	7.4136	174	1
TCGA-CESC	TCGA-EA-A3QD-01	6.9708	397	0
TCGA-BLCA	TCGA-E5-A4U1-01	7.4981	1181	0
TCGA-PAAD	TCGA-OE-A75W-01	6.7244	267	1
TCGA-SARC	TCGA-DX-AB3C-01	7.0168	2169	0
TCGA-KIRC	TCGA-BP-4762-01	6.4868	1343	1
TCGA-KIPAN	TCGA-BP-4762-01	6.4868	1343	1
TCGA-BRCA	TCGA-AR-A1AP-01	7.3817	2856	0
TCGA-LGG	TCGA-KT-A7W1-01	7.9948	438	0
TCGA-GBMLGG	TCGA-KT-A7W1-01	7.9948	438	0
TCGA-LUAD	TCGA-44-3919-01	6.926	1026	1
TCGA-COAD	TCGA-AZ-6598-01	7.5278	1503	1
TCGA-COADREAD	TCGA-AZ-6598-01	7.5278	1503	1
TCGA-COAD	TCGA-A6-6653-01	8.06	742	0
TCGA-COADREAD	TCGA-A6-6653-01	8.06	742	0
TCGA-HNSC	TCGA-CV-6952-01	6.7801	185	1
TCGA-COAD	TCGA-NH-A50V-01	6.942	588	0
TCGA-COADREAD	TCGA-NH-A50V-01	6.942	588	0
TCGA-KIRC	TCGA-B0-5109-01	6.7855	587	1
TCGA-KIPAN	TCGA-B0-5109-01	6.7855	587	1
TCGA-BRCA	TCGA-BH-A0H5-01	6.8567	1620	0
TCGA-BRCA	TCGA-OK-A5Q2-01	7.3299	64	0
TCGA-UCEC	TCGA-B5-A0K9-01	7.2021	409	1
TCGA-HNSC	TCGA-CV-A45P-01	7.0916	639	0
TCGA-BRCA	TCGA-BH-A0E6-01	7.0052	293	0
TCGA-BRCA	TCGA-D8-A1JA-01	7.4163	502	0
TCGA-LUSC	TCGA-56-7221-01	7.6119	608	0
TCGA-COAD	TCGA-AD-6899-01	7.8374	176	1
TCGA-COADREAD	TCGA-AD-6899-01	7.8374	176	1
TCGA-CHOL	TCGA-4G-AAZT-01	6.6053	420	0
TCGA-ESCA	TCGA-VR-A8EX-01	7.7378	855	1
TCGA-STES	TCGA-VR-A8EX-01	7.7378	855	1
TCGA-HNSC	TCGA-CQ-6228-01	7.5317	456	1
TCGA-LGG	TCGA-P5-A5F2-01	5.8405	242	0
TCGA-GBMLGG	TCGA-P5-A5F2-01	5.8405	242	0
TCGA-KIRC	TCGA-BP-4352-01	6.7768	344	1
TCGA-KIPAN	TCGA-BP-4352-01	6.7768	344	1
TCGA-LUAD	TCGA-99-8032-01	6.3797	44	0
TCGA-BRCA	TCGA-BH-A0BW-01	7.3593	2371	0
TCGA-KIRP	TCGA-DW-7841-01	6.9931	445	0
TCGA-KIPAN	TCGA-DW-7841-01	6.9931	445	0
TCGA-HNSC	TCGA-CV-A6JN-01	6.3156	906	0
TCGA-ACC	TCGA-OR-A5LN-01	5.7695	2342	0
TCGA-STAD	TCGA-CD-8528-01	8.9116	375	0
TCGA-STES	TCGA-CD-8528-01	8.9116	375	0
TCGA-OV	TCGA-29-1695-01	7.8729	1229	1
TCGA-THCA	TCGA-H2-A2K9-01	7.4081	659	0
TCGA-PRAD	TCGA-G9-7509-01	6.7922	1610	0
TCGA-PRAD	TCGA-J4-A67R-01	6.0193	910	0
TCGA-GBM	TCGA-19-2629-01	7.2713	737	1
TCGA-GBMLGG	TCGA-19-2629-01	7.2713	737	1
TCGA-DLBC	TCGA-GS-A9TT-01	8.0889	1163	0
TCGA-KIRC	TCGA-B2-4098-01	5.761	51	1
TCGA-KIPAN	TCGA-B2-4098-01	5.761	51	1
TCGA-STAD	TCGA-D7-8575-01	8.0936	554	1
TCGA-STES	TCGA-D7-8575-01	8.0936	554	1
TCGA-LGG	TCGA-HT-7607-01	5.1132	96	1
TCGA-GBMLGG	TCGA-HT-7607-01	5.1132	96	1
TCGA-HNSC	TCGA-CR-7380-01	8.1503	606	1
TCGA-LUSC	TCGA-43-2576-01	6.7961	1223	0
TCGA-THCA	TCGA-DJ-A2PW-01	6.8198	1060	0
TCGA-UCS	TCGA-N8-A56S-01	7.1341	371	1
TCGA-STAD	TCGA-BR-8367-01	8.0578	801	1
TCGA-STES	TCGA-BR-8367-01	8.0578	801	1
TCGA-CESC	TCGA-C5-A1ME-01	6.3887	1756	0
TCGA-GBM	TCGA-06-0238-01	5.8392	405	1
TCGA-GBMLGG	TCGA-06-0238-01	5.8392	405	1
TCGA-PRAD	TCGA-QU-A6IL-01	6.0948	97	0
TCGA-PAAD	TCGA-FB-AAQ3-01	5.8104	31	1
TCGA-SARC	TCGA-3B-A9HX-01	7.6986	1303	0
TCGA-KIRC	TCGA-CJ-5679-01	6.5233	679	1
TCGA-KIPAN	TCGA-CJ-5679-01	6.5233	679	1
TCGA-CESC	TCGA-C5-A8YR-01	7.4009	837	1
TCGA-READ	TCGA-DC-6682-01	7.3149	762	0
TCGA-COADREAD	TCGA-DC-6682-01	7.3149	762	0
TCGA-PRAD	TCGA-V1-A9Z7-01	6.9901	874	0
TCGA-KICH	TCGA-KL-8346-01	6.1912	1897	0
TCGA-KIPAN	TCGA-KL-8346-01	6.1912	1897	0
TCGA-STAD	TCGA-VQ-A91Q-01	7.7429	633	1
TCGA-STES	TCGA-VQ-A91Q-01	7.7429	633	1
TCGA-THCA	TCGA-FE-A239-01	7.1401	1023	1
TCGA-HNSC	TCGA-DQ-7594-01	7.4516	1218	0
TCGA-BLCA	TCGA-XF-A8HF-01	6.5155	2954	1
TCGA-BLCA	TCGA-KQ-A41P-01	6.9631	1094	0
TCGA-KIRC	TCGA-BP-4766-01	7.3335	1462	0
TCGA-KIPAN	TCGA-BP-4766-01	7.3335	1462	0
TCGA-LIHC	TCGA-DD-AACT-01	5.9939	1562	0
TCGA-BLCA	TCGA-BL-A13I-01	7.0127	223	1
TCGA-SARC	TCGA-DX-A7EU-01	6.7253	721	0
TCGA-BRCA	TCGA-B6-A0WZ-01	7.1243	6292	0
TCGA-BRCA	TCGA-C8-A135-01	6.8515	393	0
TCGA-THYM	TCGA-XU-A92W-01	7.747	3279	0
TCGA-LUAD	TCGA-55-8299-01	7.0364	469	1
TCGA-LUSC	TCGA-39-5027-01	7.0576	3108	0
TCGA-HNSC	TCGA-HD-7917-01	7.1404	836	1
TCGA-OV	TCGA-09-1674-01	8.4846	260	0
TCGA-LUSC	TCGA-22-5485-01	7.9596	916	1
TCGA-THCA	TCGA-EL-A4K1-01	5.9962	1046	0
TCGA-BRCA	TCGA-BH-A0E2-01	7.4831	435	0
TCGA-THCA	TCGA-DJ-A2PX-01	6.573	881	0
TCGA-BRCA	TCGA-BH-A0BJ-01	7.4289	660	0
TCGA-BRCA	TCGA-BH-A203-01	6.8691	1174	1
TCGA-THCA	TCGA-BJ-A190-01	6.9052	626	0
TCGA-THCA	TCGA-DJ-A3VM-01	6.7938	840	0
TCGA-BRCA	TCGA-A2-A1G1-01	7.5516	584	0
TCGA-KIRP	TCGA-GL-A9DD-01	6.274	341	0
TCGA-KIPAN	TCGA-GL-A9DD-01	6.274	341	0
TCGA-OV	TCGA-13-A5FT-01	7.1336	2143	0
TCGA-PAAD	TCGA-IB-AAUW-01	6.8125	230	1
TCGA-PCPG	TCGA-WB-A81M-01	7.1324	1394	0
TCGA-LGG	TCGA-HT-7873-01	7.3039	718	0
TCGA-GBMLGG	TCGA-HT-7873-01	7.3039	718	0
TCGA-KIRC	TCGA-BP-5183-01	7.1965	1291	0
TCGA-KIPAN	TCGA-BP-5183-01	7.1965	1291	0
TCGA-LUAD	TCGA-55-A491-01	6.9737	626	0
TCGA-THCA	TCGA-FY-A3NM-01	7.2257	885	0
TCGA-GBM	TCGA-06-0749-01	5.6899	82	1
TCGA-GBMLGG	TCGA-06-0749-01	5.6899	82	1
TCGA-SKCM-M	TCGA-D3-A3CE-06	7.3756	1832	1
TCGA-SKCM	TCGA-D3-A3CE-06	7.3756	1832	1
TCGA-LUSC	TCGA-46-6025-01	7.2745	324	0
TCGA-THCA	TCGA-FE-A236-01	6.7721	2031	0
TCGA-BLCA	TCGA-ZF-AA4W-01	7.3817	1830	0
TCGA-BLCA	TCGA-UY-A9PA-01	7.3344	1072	0
TCGA-KICH	TCGA-KL-8330-01	6.7399	3304	0
TCGA-KIPAN	TCGA-KL-8330-01	6.7399	3304	0
TCGA-THCA	TCGA-ET-A3DP-01	7.276	2877	0
TCGA-LGG	TCGA-HT-7603-01	4.4409	705	0
TCGA-GBMLGG	TCGA-HT-7603-01	4.4409	705	0
TCGA-UCEC	TCGA-AJ-A3NF-01	7.2505	645	0
TCGA-THYM	TCGA-4V-A9QT-01	7.4987	813	0
TCGA-PRAD	TCGA-HC-7752-01	5.4653	782	0
TCGA-CESC	TCGA-FU-A40J-01	7.1929	426	0
TCGA-KIRP	TCGA-B9-4116-01	7.6328	627	0
TCGA-KIPAN	TCGA-B9-4116-01	7.6328	627	0
TCGA-BRCA	TCGA-BH-A0C7-01	8.0435	2767	0
TCGA-LUAD	TCGA-50-6595-01	7.3867	189	1
TCGA-LGG	TCGA-DB-A64P-01	6.0588	916	0
TCGA-GBMLGG	TCGA-DB-A64P-01	6.0588	916	0
TCGA-KIRC	TCGA-BP-4981-01	6.2421	1097	1
TCGA-KIPAN	TCGA-BP-4981-01	6.2421	1097	1
TCGA-CESC	TCGA-VS-A9V5-01	6.837	494	1
TCGA-KIRC	TCGA-AK-3428-01	6.4167	3728	0
TCGA-KIPAN	TCGA-AK-3428-01	6.4167	3728	0
TCGA-BRCA	TCGA-E2-A14X-01	6.9645	972	0
TCGA-COAD	TCGA-G4-6311-01	7.8102	1199	0
TCGA-COADREAD	TCGA-G4-6311-01	7.8102	1199	0
TCGA-BRCA	TCGA-BH-A8FZ-01	7.2023	574	0
TCGA-BRCA	TCGA-S3-AA17-01	7.1633	424	0
TCGA-UCEC	TCGA-DF-A2L0-01	5.9208	788	1
TCGA-READ	TCGA-CI-6619-01	7.4838	184	0
TCGA-COADREAD	TCGA-CI-6619-01	7.4838	184	0
TCGA-STAD	TCGA-B7-A5TI-01	7.5548	595	0
TCGA-STES	TCGA-B7-A5TI-01	7.5548	595	0
TCGA-BRCA	TCGA-AR-A1AR-01	7.6639	524	1
TCGA-BRCA	TCGA-D8-A13Z-01	7.7949	635	0
TCGA-HNSC	TCGA-BA-5152-01	6.8033	1288	0
TCGA-CESC	TCGA-MY-A913-01	7.4426	524	0
TCGA-DLBC	TCGA-G8-6325-01	6.4471	1581	0
TCGA-SKCM-M	TCGA-ER-A19M-06	6.9158	1857	1
TCGA-SKCM	TCGA-ER-A19M-06	6.9158	1857	1
TCGA-KIRP	TCGA-A4-7997-01	6.9765	927	0
TCGA-KIPAN	TCGA-A4-7997-01	6.9765	927	0
TCGA-ESCA	TCGA-L5-A88T-01	7.7569	694	0
TCGA-STES	TCGA-L5-A88T-01	7.7569	694	0
TCGA-SARC	TCGA-DX-A48O-01	6.5591	1605	0
TCGA-OV	TCGA-13-1512-01	7.336	442	0
TCGA-OV	TCGA-23-2078-01	7.4097	2661	0
TCGA-BRCA	TCGA-A7-A6VX-01	7.4817	317	0
TCGA-CESC	TCGA-VS-A8Q9-01	7.5784	1630	0
TCGA-LIHC	TCGA-DD-A39V-01	5.498	643	1
TCGA-PRAD	TCGA-EJ-A65F-01	6.9664	560	0
TCGA-LUAD	TCGA-95-A4VP-01	6.7211	605	0
TCGA-KIRC	TCGA-BP-4340-01	6.8376	562	1
TCGA-KIPAN	TCGA-BP-4340-01	6.8376	562	1
TCGA-SKCM-M	TCGA-EE-A3AF-06	7.3135	420	1
TCGA-SKCM	TCGA-EE-A3AF-06	7.3135	420	1
TCGA-PRAD	TCGA-HC-8261-01	5.6848	546	0
TCGA-UCEC	TCGA-AX-A3G3-01	6.3875	42	0
TCGA-LUSC	TCGA-85-A512-01	7.2868	465	0
TCGA-THCA	TCGA-ET-A25P-01	7.434	559	0
TCGA-THCA	TCGA-DJ-A3VI-01	6.6092	95	0
TCGA-LUAD	TCGA-55-8302-01	6.8971	478	0
TCGA-LUAD	TCGA-44-4112-01	5.3564	808	1
TCGA-LUSC	TCGA-60-2710-01	8.2531	2024	0
TCGA-READ	TCGA-AF-3911-01	7.6062	1148	0
TCGA-COADREAD	TCGA-AF-3911-01	7.6062	1148	0
TCGA-HNSC	TCGA-UF-A7JJ-01	6.6911	549	0
TCGA-LUAD	TCGA-05-4430-01	6.7714	761	0
TCGA-BRCA	TCGA-AR-A255-01	7.5699	2161	0
TCGA-PCPG	TCGA-WB-A81F-01	7.1353	1737	0
TCGA-UVM	TCGA-V4-A9EQ-01	7.2384	455	1
TCGA-PAAD	TCGA-HZ-7919-01	7.3495	593	1
TCGA-HNSC	TCGA-CN-5366-01	7.1844	360	1
TCGA-BRCA	TCGA-AR-A1AT-01	7.0239	1272	1
TCGA-BLCA	TCGA-E5-A2PC-01	7.27	1326	0
TCGA-BRCA	TCGA-A2-A0CU-01	7.3673	158	1
TCGA-KIRP	TCGA-V9-A7HT-01	6.783	965	0
TCGA-KIPAN	TCGA-V9-A7HT-01	6.783	965	0
TCGA-PRAD	TCGA-YL-A8HM-01	6.8169	1482	0
TCGA-STAD	TCGA-CD-A486-01	6.5519	192	1
TCGA-STES	TCGA-CD-A486-01	6.5519	192	1
TCGA-SKCM-M	TCGA-DA-A95Y-06	7.3707	430	1
TCGA-SKCM	TCGA-DA-A95Y-06	7.3707	430	1
TCGA-BLCA	TCGA-UY-A9PE-01	7.0559	189	0
TCGA-HNSC	TCGA-CQ-7071-01	6.4726	1311	0
TCGA-UCEC	TCGA-D1-A3DG-01	7.3533	130	1
TCGA-STAD	TCGA-VQ-A8PX-01	7.7592	1964	0
TCGA-STES	TCGA-VQ-A8PX-01	7.7592	1964	0
TCGA-BLCA	TCGA-XF-A9SV-01	7.1592	388	1
TCGA-OV	TCGA-24-1924-01	6.637	919	1
TCGA-KIRC	TCGA-B0-5120-01	6.5614	1169	0
TCGA-KIPAN	TCGA-B0-5120-01	6.5614	1169	0
TCGA-SARC	TCGA-DX-A6BG-01	7.1318	1121	0
TCGA-BRCA	TCGA-BH-A0AZ-01	7.3145	1919	0
TCGA-SKCM-M	TCGA-EE-A184-06	7.2992	2073	1
TCGA-SKCM	TCGA-EE-A184-06	7.2992	2073	1
TCGA-BLCA	TCGA-E7-A6MF-01	7.4506	750	0
TCGA-KIRC	TCGA-MM-A84U-01	6.4031	700	0
TCGA-KIPAN	TCGA-MM-A84U-01	6.4031	700	0
TCGA-HNSC	TCGA-CV-6933-01	7.0025	2741	1
TCGA-ESCA	TCGA-LN-A8HZ-01	8.2245	375	0
TCGA-STES	TCGA-LN-A8HZ-01	8.2245	375	0
TCGA-CESC	TCGA-DS-A0VL-01	7.7611	81	0
TCGA-LUSC	TCGA-63-6202-01	7.1524	1602	0
TCGA-TGCT	TCGA-SB-A76C-01	8.4509	42	0
TCGA-SKCM-M	TCGA-FS-A1YY-06	7.5928	6953	1
TCGA-SKCM	TCGA-FS-A1YY-06	7.5928	6953	1
TCGA-LUSC	TCGA-46-3767-01	6.4555	396	0
TCGA-BRCA	TCGA-E2-A1IH-01	6.8044	1026	0
TCGA-OV	TCGA-13-1496-01	6.2359	129	1
TCGA-KIRC	TCGA-B0-5095-01	7.134	245	1
TCGA-KIPAN	TCGA-B0-5095-01	7.134	245	1
TCGA-GBM	TCGA-06-0174-01	7.0276	98	1
TCGA-GBMLGG	TCGA-06-0174-01	7.0276	98	1
TCGA-READ	TCGA-CI-6622-01	7.4225	1362	0
TCGA-COADREAD	TCGA-CI-6622-01	7.4225	1362	0
TCGA-KIRC	TCGA-BP-4167-01	6.1555	2718	0
TCGA-KIPAN	TCGA-BP-4167-01	6.1555	2718	0
TCGA-LGG	TCGA-HW-7486-01	5.6049	1721	0
TCGA-GBMLGG	TCGA-HW-7486-01	5.6049	1721	0
TCGA-LIHC	TCGA-ZP-A9D2-01	7.3374	765	1
TCGA-BRCA	TCGA-BH-A18R-01	7.5792	1142	1
TCGA-HNSC	TCGA-BA-7269-01	6.1713	1273	0
TCGA-BLCA	TCGA-ZF-AA56-01	7.3015	259	1
TCGA-STAD	TCGA-HU-A4G3-01	6.6642	170	0
TCGA-STES	TCGA-HU-A4G3-01	6.6642	170	0
TCGA-ACC	TCGA-OR-A5KY-01	6.8158	391	1
TCGA-SKCM-M	TCGA-ER-A19A-06	7.2797	2365	0
TCGA-SKCM	TCGA-ER-A19A-06	7.2797	2365	0
TCGA-COAD	TCGA-NH-A6GC-01	7.0996	389	0
TCGA-COADREAD	TCGA-NH-A6GC-01	7.0996	389	0
TCGA-SARC	TCGA-DX-A48K-01	7.3128	1399	0
TCGA-LIHC	TCGA-DD-A73B-01	6.361	283	1
TCGA-BRCA	TCGA-AC-A4ZE-01	7.6116	890	0
TCGA-LGG	TCGA-P5-A5F1-01	6.0492	179	0
TCGA-GBMLGG	TCGA-P5-A5F1-01	6.0492	179	0
TCGA-BLCA	TCGA-DK-AA6X-01	6.8942	467	0
TCGA-LAML	TCGA-AB-2877-03	7.5909	638	0
TCGA-STAD	TCGA-BR-7722-01	7.0407	466	1
TCGA-STES	TCGA-BR-7722-01	7.0407	466	1
TCGA-BRCA	TCGA-B6-A0RS-01	6.6518	3063	1
TCGA-LUSC	TCGA-33-AAS8-01	7.7235	1114	1
TCGA-BRCA	TCGA-AR-A24H-01	7.9714	4894	0
TCGA-COAD	TCGA-F4-6570-01	7.5699	188	1
TCGA-COADREAD	TCGA-F4-6570-01	7.5699	188	1
TCGA-THCA	TCGA-E8-A432-01	7.0207	931	0
TCGA-HNSC	TCGA-MZ-A5BI-01	7.3146	217	1
TCGA-OV	TCGA-24-1928-01	7.4269	336	1
TCGA-LGG	TCGA-DU-7011-01	5.3413	3200	1
TCGA-GBMLGG	TCGA-DU-7011-01	5.3413	3200	1
TCGA-COAD	TCGA-G4-6627-01	7.0198	2275	0
TCGA-COADREAD	TCGA-G4-6627-01	7.0198	2275	0
TCGA-PRAD	TCGA-J9-A8CP-01	6.6823	386	0
TCGA-BLCA	TCGA-ZF-A9R9-01	6.5821	864	1
TCGA-PCPG	TCGA-P8-A6RX-01	7.0249	540	0
TCGA-HNSC	TCGA-UF-A7JF-01	6.6074	1686	0
TCGA-BRCA	TCGA-A8-A099-01	7.5497	304	0
TCGA-COAD	TCGA-CM-6679-01	7.1472	306	0
TCGA-COADREAD	TCGA-CM-6679-01	7.1472	306	0
TCGA-DLBC	TCGA-G8-6907-01	6.202	595	1
TCGA-PAAD	TCGA-HV-A5A4-01	7.0893	232	0
TCGA-READ	TCGA-DC-6157-01	7.6989	1581	0
TCGA-COADREAD	TCGA-DC-6157-01	7.6989	1581	0
TCGA-CESC	TCGA-VS-A9UU-01	7.3362	442	0
TCGA-LUSC	TCGA-66-2790-01	6.981	699	0
TCGA-LUAD	TCGA-75-7027-01	7.322	3059	0
TCGA-PRAD	TCGA-V1-A8WS-01	6.9656	474	0
TCGA-THCA	TCGA-CE-A3MD-01	6.837	389	0
TCGA-STAD	TCGA-HU-A4GD-01	7.2643	692	0
TCGA-STES	TCGA-HU-A4GD-01	7.2643	692	0
TCGA-STAD	TCGA-VQ-A94U-01	7.3258	819	0
TCGA-STES	TCGA-VQ-A94U-01	7.3258	819	0
TCGA-MESO	TCGA-LK-A4O0-01	7.2379	185	1
TCGA-PAAD	TCGA-XD-AAUG-01	6.726	420	0
TCGA-LIHC	TCGA-FV-A4ZP-01	5.8625	2486	1
TCGA-KICH	TCGA-KN-8435-01	6.58	3498	0
TCGA-KIPAN	TCGA-KN-8435-01	6.58	3498	0
TCGA-COAD	TCGA-A6-4105-01	7.7441	442	1
TCGA-COADREAD	TCGA-A6-4105-01	7.7441	442	1
TCGA-OV	TCGA-04-1514-01	7.0398	1720	1
TCGA-LGG	TCGA-P5-A77X-01	5.1305	105	0
TCGA-GBMLGG	TCGA-P5-A77X-01	5.1305	105	0
TCGA-LUSC	TCGA-NC-A5HI-01	7.5479	1743	0
TCGA-KIRC	TCGA-BP-4781-01	6.9225	2080	0
TCGA-KIPAN	TCGA-BP-4781-01	6.9225	2080	0
TCGA-HNSC	TCGA-CV-6937-01	7.044	624	1
TCGA-UCEC	TCGA-AJ-A3QS-01	7.1114	513	0
TCGA-LIHC	TCGA-DD-AACS-01	6.7227	1804	0
TCGA-CESC	TCGA-VS-A9U6-01	7.4429	1320	0
TCGA-SKCM-P	TCGA-EB-A6QZ-01	7.3742	352	1
TCGA-SKCM	TCGA-EB-A6QZ-01	7.3742	352	1
TCGA-HNSC	TCGA-IQ-7631-01	6.1595	1172	0
TCGA-ESCA	TCGA-L5-A4OI-01	8.411	608	0
TCGA-STES	TCGA-L5-A4OI-01	8.411	608	0
TCGA-SKCM-P	TCGA-EB-A1NK-01	6.8132	1039	0
TCGA-SKCM	TCGA-EB-A1NK-01	6.8132	1039	0
TCGA-SKCM-M	TCGA-D3-A8GQ-06	6.9796	884	1
TCGA-SKCM	TCGA-D3-A8GQ-06	6.9796	884	1
TCGA-BRCA	TCGA-A8-A09R-01	7.8332	273	0
TCGA-BLCA	TCGA-DK-AA6S-01	6.9391	5050	0
TCGA-PRAD	TCGA-V1-A9Z8-01	6.7937	827	0
TCGA-LIHC	TCGA-DD-A4NK-01	6.4438	1210	1
TCGA-THYM	TCGA-3S-A8YW-01	7.0561	643	0
TCGA-STAD	TCGA-VQ-A8PJ-01	7.9843	82	1
TCGA-STES	TCGA-VQ-A8PJ-01	7.9843	82	1
TCGA-BLCA	TCGA-KQ-A41S-01	6.9345	35	0
TCGA-LUAD	TCGA-44-2668-01	6.5313	761	1
TCGA-LUAD	TCGA-55-8507-01	7.2664	418	0
TCGA-THCA	TCGA-DJ-A3UN-01	6.908	986	0
TCGA-LAML	TCGA-AB-2869-03	8.0599	243	0
TCGA-LGG	TCGA-HW-7493-01	5.9873	2107	0
TCGA-GBMLGG	TCGA-HW-7493-01	5.9873	2107	0
TCGA-LIHC	TCGA-CC-5261-01	7.5845	97	1
TCGA-CESC	TCGA-C5-A2LX-01	6.5976	2526	0
TCGA-HNSC	TCGA-CR-6471-01	7.9166	1202	1
TCGA-LGG	TCGA-VM-A8CA-01	5.2307	411	0
TCGA-GBMLGG	TCGA-VM-A8CA-01	5.2307	411	0
TCGA-BRCA	TCGA-EW-A6SC-01	7.6274	952	0
TCGA-KIRC	TCGA-B0-5699-01	7.2257	3841	0
TCGA-KIPAN	TCGA-B0-5699-01	7.2257	3841	0
TCGA-PRAD	TCGA-XQ-A8TB-01	7.0228	770	0
TCGA-LUSC	TCGA-37-5819-01	6.4728	103	0
TCGA-LGG	TCGA-DU-7015-01	6.1532	2761	0
TCGA-GBMLGG	TCGA-DU-7015-01	6.1532	2761	0
TCGA-MESO	TCGA-MQ-A4LJ-01	7.0755	709	1
TCGA-CESC	TCGA-C5-A1M8-01	7.1532	919	0
TCGA-CESC	TCGA-C5-A7CJ-01	7.6483	3097	1
TCGA-LUSC	TCGA-22-A5C4-01	7.3524	671	0
TCGA-SARC	TCGA-HB-A2OT-01	6.7896	2057	0
TCGA-LUSC	TCGA-85-A4CL-01	6.7932	921	1
TCGA-LGG	TCGA-TM-A7C5-01	5.5868	1500	0
TCGA-GBMLGG	TCGA-TM-A7C5-01	5.5868	1500	0
TCGA-SARC	TCGA-DX-A3UB-01	7.1667	2247	0
TCGA-KIRC	TCGA-BP-4801-01	6.826	1124	0
TCGA-KIPAN	TCGA-BP-4801-01	6.826	1124	0
TCGA-BRCA	TCGA-D8-A1XC-01	7.2352	377	1
TCGA-LGG	TCGA-DU-8162-01	5.4884	444	1
TCGA-GBMLGG	TCGA-DU-8162-01	5.4884	444	1
TCGA-LGG	TCGA-TM-A84O-01	6.2166	1011	1
TCGA-GBMLGG	TCGA-TM-A84O-01	6.2166	1011	1
TCGA-GBM	TCGA-06-5410-01	5.8435	108	1
TCGA-GBMLGG	TCGA-06-5410-01	5.8435	108	1
TCGA-READ	TCGA-DC-6158-01	7.7572	334	1
TCGA-COADREAD	TCGA-DC-6158-01	7.7572	334	1
TCGA-SKCM-M	TCGA-FW-A3TU-06	6.6489	1691	1
TCGA-SKCM	TCGA-FW-A3TU-06	6.6489	1691	1
TCGA-LUAD	TCGA-69-8254-01	7.0081	409	0
TCGA-THYM	TCGA-3T-AA9L-01	7.2338	1050	0
TCGA-PRAD	TCGA-HC-A6HY-01	6.7074	134	0
TCGA-THCA	TCGA-EM-A3FM-01	6.9305	639	0
TCGA-CESC	TCGA-GH-A9DA-01	8.1042	540	0
TCGA-HNSC	TCGA-TN-A7HL-01	7.0545	619	0
TCGA-SARC	TCGA-3B-A9HT-01	7.3447	1665	0
TCGA-LAML	TCGA-AB-2896-03	7.9743	214	1
TCGA-HNSC	TCGA-CN-4742-01	7.7821	397	1
TCGA-OV	TCGA-04-1348-01	7.7323	1483	1
TCGA-STAD	TCGA-RD-A8N6-01	7.2892	272	1
TCGA-STES	TCGA-RD-A8N6-01	7.2892	272	1
TCGA-LIHC	TCGA-DD-AACX-01	6.337	170	0
TCGA-LUAD	TCGA-78-8640-01	7.3637	7062	0
TCGA-THCA	TCGA-DJ-A3UY-01	6.926	1091	0
TCGA-BRCA	TCGA-EW-A1PE-01	7.7009	320	0
TCGA-LUAD	TCGA-69-7979-01	7.3607	408	0
TCGA-BRCA	TCGA-E2-A1II-01	7.2703	1025	0
TCGA-BRCA	TCGA-S3-AA14-01	7.5768	529	0
TCGA-HNSC	TCGA-CR-7392-01	7.3442	1425	0
TCGA-LGG	TCGA-S9-A7R3-01	5.8145	3013	0
TCGA-GBMLGG	TCGA-S9-A7R3-01	5.8145	3013	0
TCGA-BRCA	TCGA-A8-A09B-01	7.3067	365	0
TCGA-LUSC	TCGA-60-2714-01	7.0612	1531	0
TCGA-SKCM-M	TCGA-GN-A9SD-06	6.7208	1807	1
TCGA-SKCM	TCGA-GN-A9SD-06	6.7208	1807	1
TCGA-TGCT	TCGA-2G-AAFO-01	7.3455	685	0
TCGA-BRCA	TCGA-AR-A5QP-01	7.0442	1185	0
TCGA-UCS	TCGA-NF-A4WX-01	6.8907	452	0
TCGA-LIHC	TCGA-DD-AAE0-01	6.8546	555	0
TCGA-SKCM-M	TCGA-D9-A6EG-06	7.2799	698	1
TCGA-SKCM	TCGA-D9-A6EG-06	7.2799	698	1
TCGA-BRCA	TCGA-E9-A6HE-01	6.9879	847	0
TCGA-STAD	TCGA-BR-8291-01	7.4795	607	1
TCGA-STES	TCGA-BR-8291-01	7.4795	607	1
TCGA-LIHC	TCGA-DD-AADA-01	5.9791	1233	0
TCGA-LGG	TCGA-TQ-A7RN-01	6.0367	1026	0
TCGA-GBMLGG	TCGA-TQ-A7RN-01	6.0367	1026	0
TCGA-TGCT	TCGA-ZM-AA0B-01	7.5093	838	0
TCGA-KIRP	TCGA-GL-A9DE-01	6.4472	496	0
TCGA-KIPAN	TCGA-GL-A9DE-01	6.4472	496	0
TCGA-PAAD	TCGA-2J-AABI-01	6.7097	969	0
TCGA-BRCA	TCGA-BH-A0HI-01	7.2275	620	0
TCGA-LAML	TCGA-AB-2985-03	6.4286	273	1
TCGA-TGCT	TCGA-XE-AANI-01	7.3402	1041	0
TCGA-THCA	TCGA-ET-A3DT-01	6.3717	1330	0
TCGA-LIHC	TCGA-DD-A1EI-01	6.055	183	0
TCGA-KIRC	TCGA-BP-4790-01	7.1906	1111	1
TCGA-KIPAN	TCGA-BP-4790-01	7.1906	1111	1
TCGA-KIRC	TCGA-BP-5008-01	7.0526	1071	0
TCGA-KIPAN	TCGA-BP-5008-01	7.0526	1071	0
TCGA-KIRC	TCGA-BP-4170-01	6.9279	2343	1
TCGA-KIPAN	TCGA-BP-4170-01	6.9279	2343	1
TCGA-UCEC	TCGA-AJ-A3BK-01	7.0309	1031	0
TCGA-OV	TCGA-04-1530-01	6.5241	3622	1
TCGA-SKCM-M	TCGA-FS-A4FC-06	7.2373	1655	1
TCGA-SKCM	TCGA-FS-A4FC-06	7.2373	1655	1
TCGA-HNSC	TCGA-CR-6480-01	8.3728	362	0
TCGA-THCA	TCGA-EL-A3D1-01	6.4224	2997	0
TCGA-HNSC	TCGA-CV-6942-01	7.0375	4282	0
TCGA-COAD	TCGA-D5-6924-01	7.7842	435	0
TCGA-COADREAD	TCGA-D5-6924-01	7.7842	435	0
TCGA-GBM	TCGA-28-2513-01	6.6085	222	0
TCGA-GBMLGG	TCGA-28-2513-01	6.6085	222	0
TCGA-BRCA	TCGA-EW-A1P1-01	7.1451	1210	0
TCGA-LIHC	TCGA-BC-A5W4-01	6.1841	547	1
TCGA-LUSC	TCGA-39-5019-01	6.6876	3387	0
TCGA-UCEC	TCGA-JU-AAVI-01	6.8561	540	1
TCGA-PCPG	TCGA-QR-A70R-01	6.7173	432	0
TCGA-BRCA	TCGA-OL-A66P-01	5.6979	428	0
TCGA-UCS	TCGA-NG-A4VW-01	7.8021	949	1
TCGA-SKCM-M	TCGA-EE-A3JA-06	6.1951	1618	1
TCGA-SKCM	TCGA-EE-A3JA-06	6.1951	1618	1
TCGA-BRCA	TCGA-A2-A1G4-01	7.7176	595	0
TCGA-BRCA	TCGA-E2-A105-01	7.7259	1308	0
TCGA-LUAD	TCGA-55-7573-01	6.9799	487	0
TCGA-UCS	TCGA-N5-A4RA-01	6.2664	1591	1
TCGA-PCPG	TCGA-WB-A80M-01	6.5613	136	0
TCGA-ESCA	TCGA-L5-A4OR-01	8.3386	96	1
TCGA-STES	TCGA-L5-A4OR-01	8.3386	96	1
TCGA-OV	TCGA-25-2042-01	7.6529	396	1
TCGA-HNSC	TCGA-CV-A45W-01	6.9345	1398	1
TCGA-BRCA	TCGA-E2-A573-01	6.5188	1062	0
TCGA-KIRC	TCGA-B0-5085-01	6.2006	770	1
TCGA-KIPAN	TCGA-B0-5085-01	6.2006	770	1
TCGA-LGG	TCGA-DU-A6S6-01	5.9903	2893	0
TCGA-GBMLGG	TCGA-DU-A6S6-01	5.9903	2893	0
TCGA-TGCT	TCGA-YU-AA61-01	7.9374	864	0
TCGA-KIRC	TCGA-DV-A4W0-01	6.9689	2470	0
TCGA-KIPAN	TCGA-DV-A4W0-01	6.9689	2470	0
TCGA-COAD	TCGA-AD-6965-01	8.0581	805	0
TCGA-COADREAD	TCGA-AD-6965-01	8.0581	805	0
TCGA-THCA	TCGA-BJ-A3PR-01	6.5775	1107	0
TCGA-MESO	TCGA-SH-A7BD-01	6.2683	459	1
TCGA-THCA	TCGA-H2-A422-01	7.0871	566	0
TCGA-UCEC	TCGA-EY-A549-01	6.6521	605	0
TCGA-SARC	TCGA-DX-A6YU-01	6.8578	1045	0
TCGA-LGG	TCGA-P5-A735-01	6.1426	292	0
TCGA-GBMLGG	TCGA-P5-A735-01	6.1426	292	0
TCGA-LAML	TCGA-AB-2994-03	8.0465	1798	0
TCGA-STAD	TCGA-VQ-A928-01	8.0911	174	1
TCGA-STES	TCGA-VQ-A928-01	8.0911	174	1
TCGA-COAD	TCGA-D5-6931-01	8.2086	365	0
TCGA-COADREAD	TCGA-D5-6931-01	8.2086	365	0
TCGA-SARC	TCGA-DX-A6Z2-01	6.8741	3079	0
TCGA-LIHC	TCGA-BC-A10T-01	5.7052	837	1
TCGA-CESC	TCGA-EA-A5O9-01	7.4681	788	0
TCGA-LUSC	TCGA-43-5668-01	6.7754	559	1
TCGA-PAAD	TCGA-FB-AAQ0-01	6.9825	473	1
TCGA-SKCM-P	TCGA-BF-AAP1-01	7.2686	409	0
TCGA-SKCM	TCGA-BF-AAP1-01	7.2686	409	0
TCGA-BRCA	TCGA-A2-A0EV-01	7.5742	968	0
TCGA-OV	TCGA-31-1950-01	6.812	571	0
TCGA-LUSC	TCGA-18-4083-01	7.6694	188	1
TCGA-LGG	TCGA-FG-A6J1-01	5.557	500	0
TCGA-GBMLGG	TCGA-FG-A6J1-01	5.557	500	0
TCGA-LGG	TCGA-S9-A7R7-01	6.5382	3000	0
TCGA-GBMLGG	TCGA-S9-A7R7-01	6.5382	3000	0
TCGA-LAML	TCGA-AB-2870-03	8.3181	153	1
TCGA-STAD	TCGA-CD-8526-01	8.2987	381	0
TCGA-STES	TCGA-CD-8526-01	8.2987	381	0
TCGA-STAD	TCGA-BR-7703-01	7.2901	1100	0
TCGA-STES	TCGA-BR-7703-01	7.2901	1100	0
TCGA-KIRP	TCGA-AL-3471-01	6.6613	1500	1
TCGA-KIPAN	TCGA-AL-3471-01	6.6613	1500	1
TCGA-TGCT	TCGA-2G-AAH0-01	8.3293	5477	0
TCGA-THYM	TCGA-YT-A95D-01	7.4058	750	0
TCGA-BRCA	TCGA-E9-A1RG-01	7.0935	647	0
TCGA-BLCA	TCGA-YF-AA3M-01	7.5979	415	0
TCGA-GBM	TCGA-76-4929-01	6.1436	111	1
TCGA-GBMLGG	TCGA-76-4929-01	6.1436	111	1
TCGA-OV	TCGA-24-1413-01	6.8535	192	0
TCGA-SKCM-M	TCGA-EE-A2MU-06	7.1424	1620	0
TCGA-SKCM	TCGA-EE-A2MU-06	7.1424	1620	0
TCGA-LAML	TCGA-AB-2981-03	7.444	487	0
TCGA-TGCT	TCGA-SN-A84W-01	7.934	293	0
TCGA-COAD	TCGA-A6-5656-01	6.2635	1001	0
TCGA-COADREAD	TCGA-A6-5656-01	6.2635	1001	0
TCGA-LUSC	TCGA-43-8115-01	7.2173	407	0
TCGA-PAAD	TCGA-3A-A9IX-01	6.5441	1037	0
TCGA-READ	TCGA-EI-6884-01	7.7149	328	0
TCGA-COADREAD	TCGA-EI-6884-01	7.7149	328	0
TCGA-LGG	TCGA-DU-6402-01	7.5061	214	1
TCGA-GBMLGG	TCGA-DU-6402-01	7.5061	214	1
TCGA-CESC	TCGA-Q1-A73P-01	6.9715	483	0
TCGA-UVM	TCGA-V4-A9EI-01	7.1677	389	1
TCGA-LGG	TCGA-HT-7684-01	5.0742	184	0
TCGA-GBMLGG	TCGA-HT-7684-01	5.0742	184	0
TCGA-BRCA	TCGA-D8-A1XL-01	6.7879	606	0
TCGA-SKCM-M	TCGA-ER-A3EV-06	7.302	1429	1
TCGA-SKCM	TCGA-ER-A3EV-06	7.302	1429	1
TCGA-THCA	TCGA-E8-A413-01	6.864	912	0
TCGA-HNSC	TCGA-BA-6871-01	7.6294	108	1
TCGA-LGG	TCGA-HT-8104-01	7.1044	372	0
TCGA-GBMLGG	TCGA-HT-8104-01	7.1044	372	0
TCGA-HNSC	TCGA-CN-6017-01	6.7928	853	1
TCGA-LIHC	TCGA-CC-A7IH-01	6.6249	365	0
TCGA-STAD	TCGA-D7-A747-01	6.2315	255	1
TCGA-STES	TCGA-D7-A747-01	6.2315	255	1
TCGA-KIRP	TCGA-A4-7585-01	6.0181	1070	1
TCGA-KIPAN	TCGA-A4-7585-01	6.0181	1070	1
TCGA-MESO	TCGA-TS-A7P6-01	6.89	283	1
TCGA-PAAD	TCGA-3A-A9IO-01	6.4678	1942	0
TCGA-LIHC	TCGA-DD-A4NG-01	5.7821	802	1
TCGA-KIRC	TCGA-BP-5170-01	6.4497	2412	0
TCGA-KIPAN	TCGA-BP-5170-01	6.4497	2412	0
TCGA-LGG	TCGA-FN-7833-01	6.3118	837	0
TCGA-GBMLGG	TCGA-FN-7833-01	6.3118	837	0
TCGA-KICH	TCGA-KN-8436-01	6.6503	1288	0
TCGA-KIPAN	TCGA-KN-8436-01	6.6503	1288	0
TCGA-CESC	TCGA-C5-A8XK-01	7.2592	3039	0
TCGA-LUSC	TCGA-43-A474-01	7.7219	353	0
TCGA-LGG	TCGA-HT-7473-01	6.2655	503	0
TCGA-GBMLGG	TCGA-HT-7473-01	6.2655	503	0
TCGA-GBM	TCGA-06-0645-01	6.687	175	1
TCGA-GBMLGG	TCGA-06-0645-01	6.687	175	1
TCGA-LAML	TCGA-AB-2884-03	7.6965	731	1
TCGA-LUSC	TCGA-33-AASI-01	6.9583	1344	1
TCGA-COAD	TCGA-DM-A1DA-01	7.3098	228	1
TCGA-COADREAD	TCGA-DM-A1DA-01	7.3098	228	1
TCGA-KIRP	TCGA-UZ-A9PV-01	7.185	1444	0
TCGA-KIPAN	TCGA-UZ-A9PV-01	7.185	1444	0
TCGA-THCA	TCGA-BJ-A2N9-01	6.3462	623	0
TCGA-SKCM-M	TCGA-EE-A2M5-06	8.1429	659	1
TCGA-SKCM	TCGA-EE-A2M5-06	8.1429	659	1
TCGA-BLCA	TCGA-CF-A7I0-01	7.0882	368	0
TCGA-OV	TCGA-25-1625-01	6.97	840	1
TCGA-LIHC	TCGA-WJ-A86L-01	6.3093	345	0
TCGA-LAML	TCGA-AB-2998-03	8.1418	31	1
TCGA-SARC	TCGA-DX-AB2X-01	7.1966	404	1
TCGA-PRAD	TCGA-HC-A632-01	6.8544	61	0
TCGA-SARC	TCGA-MJ-A850-01	6.9272	681	0
TCGA-CESC	TCGA-C5-A907-01	7.4021	448	0
TCGA-LUAD	TCGA-49-4506-01	5.5729	999	1
TCGA-LGG	TCGA-HT-8019-01	3.9874	1004	0
TCGA-GBMLGG	TCGA-HT-8019-01	3.9874	1004	0
TCGA-KIRP	TCGA-BQ-5877-01	7.4657	270	1
TCGA-KIPAN	TCGA-BQ-5877-01	7.4657	270	1
TCGA-STAD	TCGA-BR-6564-01	6.4431	794	1
TCGA-STES	TCGA-BR-6564-01	6.4431	794	1
TCGA-KIRC	TCGA-B2-5633-01	5.9467	963	0
TCGA-KIPAN	TCGA-B2-5633-01	5.9467	963	0
TCGA-PRAD	TCGA-G9-6353-01	6.4204	1542	0
TCGA-BRCA	TCGA-A2-A0ER-01	7.3748	2263	0
TCGA-ESCA	TCGA-IG-A8O2-01	7.6902	142	1
TCGA-STES	TCGA-IG-A8O2-01	7.6902	142	1
TCGA-CESC	TCGA-VS-A9UD-01	6.9265	739	0
TCGA-UCEC	TCGA-AX-A1C7-01	5.896	1054	0
TCGA-LGG	TCGA-TQ-A7RU-01	6.2808	1032	0
TCGA-GBMLGG	TCGA-TQ-A7RU-01	6.2808	1032	0
TCGA-KIRC	TCGA-BP-4982-01	7.1075	1014	0
TCGA-KIPAN	TCGA-BP-4982-01	7.1075	1014	0
TCGA-SKCM-M	TCGA-EE-A2GP-06	7.4634	423	1
TCGA-SKCM	TCGA-EE-A2GP-06	7.4634	423	1
TCGA-BLCA	TCGA-XF-A9T8-01	7.3754	418	1
TCGA-TGCT	TCGA-2G-AAG0-01	7.9877	1529	0
TCGA-BLCA	TCGA-CU-A0YR-01	7.6448	460	1
TCGA-UCEC	TCGA-EO-A22X-01	7.6655	1752	0
TCGA-LIHC	TCGA-DD-A4ND-01	6.8162	2746	0
TCGA-THYM	TCGA-X7-A8DB-01	7.4764	1992	0
TCGA-LUSC	TCGA-66-2785-01	6.4776	60	0
TCGA-OV	TCGA-25-1630-01	7.0049	1162	1
TCGA-BRCA	TCGA-OL-A66K-01	7.3103	1275	1
TCGA-KIRP	TCGA-P4-A5E8-01	6.7144	1306	1
TCGA-KIPAN	TCGA-P4-A5E8-01	6.7144	1306	1
TCGA-ESCA	TCGA-Q9-A6FW-01	7.1837	238	0
TCGA-STES	TCGA-Q9-A6FW-01	7.1837	238	0
TCGA-STAD	TCGA-IN-7806-01	7.0543	1106	0
TCGA-STES	TCGA-IN-7806-01	7.0543	1106	0
TCGA-OV	TCGA-36-1574-01	7.1133	686	0
TCGA-HNSC	TCGA-QK-A8Z8-01	7.1924	171	1
TCGA-HNSC	TCGA-CQ-5326-01	7.835	89	1
TCGA-LGG	TCGA-DB-A4XF-01	5.6843	1021	0
TCGA-GBMLGG	TCGA-DB-A4XF-01	5.6843	1021	0
TCGA-LIHC	TCGA-2Y-A9H2-01	6.777	1731	0
TCGA-CESC	TCGA-C5-A7CM-01	7.251	619	0
TCGA-TGCT	TCGA-4K-AAAL-01	7.5945	483	0
TCGA-PRAD	TCGA-G9-6367-01	6.5057	1222	0
TCGA-KIRP	TCGA-A4-A5Y1-01	6.8941	395	1
TCGA-KIPAN	TCGA-A4-A5Y1-01	6.8941	395	1
TCGA-LUSC	TCGA-56-8201-01	7.5967	397	1
TCGA-PRAD	TCGA-G9-6342-01	6.8896	1696	0
TCGA-HNSC	TCGA-KU-A66T-01	6.9835	552	0
TCGA-LIHC	TCGA-DD-AAVW-01	6.3933	2317	0
TCGA-KIRC	TCGA-CJ-4905-01	7.4226	1496	0
TCGA-KIPAN	TCGA-CJ-4905-01	7.4226	1496	0
TCGA-ESCA	TCGA-LN-A7HY-01	7.0744	366	0
TCGA-STES	TCGA-LN-A7HY-01	7.0744	366	0
TCGA-PRAD	TCGA-KK-A7AQ-01	6.3544	1610	0
TCGA-SARC	TCGA-IE-A3OV-01	6.7925	2448	1
TCGA-KIRP	TCGA-G7-6790-01	6.7249	1575	0
TCGA-KIPAN	TCGA-G7-6790-01	6.7249	1575	0
TCGA-TGCT	TCGA-XY-A89B-01	7.7627	471	0
TCGA-LIHC	TCGA-CC-A7IL-01	5.6676	278	1
TCGA-BRCA	TCGA-EW-A1OX-01	7.3428	911	0
TCGA-BRCA	TCGA-S3-AA10-01	7.5265	586	0
TCGA-LAML	TCGA-AB-2978-03	6.0398	699	0
TCGA-UVM	TCGA-YZ-A984-01	7.1463	1396	1
TCGA-PRAD	TCGA-EJ-A65M-01	6.3522	230	0
TCGA-KIRC	TCGA-BP-5174-01	6.7381	2257	0
TCGA-KIPAN	TCGA-BP-5174-01	6.7381	2257	0
TCGA-PCPG	TCGA-QR-A705-01	6.0993	317	0
TCGA-OV	TCGA-20-1684-01	7.3939	581	0
TCGA-UCS	TCGA-N8-A4PI-01	7.1214	810	1
TCGA-LUAD	TCGA-05-4402-01	6.8963	244	1
TCGA-TGCT	TCGA-2G-AAH4-01	7.8891	6210	0
TCGA-HNSC	TCGA-CX-7086-01	8.0594	573	0
TCGA-THCA	TCGA-ET-A25L-01	6.5549	1721	0
TCGA-KIRP	TCGA-UZ-A9PZ-01	6.849	657	0
TCGA-KIPAN	TCGA-UZ-A9PZ-01	6.849	657	0
TCGA-BRCA	TCGA-A8-A0A9-01	8.0283	822	0
TCGA-THCA	TCGA-DE-A2OL-01	7.2718	1145	0
TCGA-KIRP	TCGA-G7-A4TM-01	7.2765	768	0
TCGA-KIPAN	TCGA-G7-A4TM-01	7.2765	768	0
TCGA-KIRP	TCGA-BQ-7060-01	6.2685	214	0
TCGA-KIPAN	TCGA-BQ-7060-01	6.2685	214	0
TCGA-LIHC	TCGA-DD-A4NS-01	6.8235	2456	1
TCGA-HNSC	TCGA-CN-5356-01	8.1061	1409	0
TCGA-KIRC	TCGA-EU-5905-01	6.6006	119	0
TCGA-KIPAN	TCGA-EU-5905-01	6.6006	119	0
TCGA-KIRC	TCGA-B0-4697-01	5.0259	578	1
TCGA-KIPAN	TCGA-B0-4697-01	5.0259	578	1
TCGA-PCPG	TCGA-QR-A6GO-01	6.9937	1065	0
TCGA-STAD	TCGA-IN-AB1X-01	7.7231	411	0
TCGA-STES	TCGA-IN-AB1X-01	7.7231	411	0
TCGA-BRCA	TCGA-BH-A1FB-01	7.1383	3669	1
TCGA-LUAD	TCGA-44-8119-01	7.3506	285	0
TCGA-OV	TCGA-13-0886-01	5.9894	4665	0
TCGA-SKCM-M	TCGA-EE-A29X-06	7.3034	545	1
TCGA-SKCM	TCGA-EE-A29X-06	7.3034	545	1
TCGA-KIRC	TCGA-BP-4759-01	5.9112	2372	0
TCGA-KIPAN	TCGA-BP-4759-01	5.9112	2372	0
TCGA-SKCM-M	TCGA-GN-A262-06	6.8849	4255	0
TCGA-SKCM	TCGA-GN-A262-06	6.8849	4255	0
TCGA-LGG	TCGA-FG-A713-01	4.9169	622	0
TCGA-GBMLGG	TCGA-FG-A713-01	4.9169	622	0
TCGA-UVM	TCGA-V4-A9EZ-01	6.1083	599	0
TCGA-CESC	TCGA-VS-A9V2-01	7.6479	555	0
TCGA-CESC	TCGA-VS-A94Y-01	7.2577	144	1
TCGA-COAD	TCGA-F4-6461-01	7.2759	338	1
TCGA-COADREAD	TCGA-F4-6461-01	7.2759	338	1
TCGA-LUSC	TCGA-90-A4EE-01	7.1911	688	0
TCGA-CESC	TCGA-C5-A8ZZ-01	8.1155	636	0
TCGA-MESO	TCGA-MQ-A6BS-01	6.5521	608	1
TCGA-STAD	TCGA-CD-8533-01	8.5224	468	0
TCGA-STES	TCGA-CD-8533-01	8.5224	468	0
TCGA-SARC	TCGA-IS-A3K8-01	6.573	4845	0
TCGA-LGG	TCGA-E1-A7YL-01	6.797	492	1
TCGA-GBMLGG	TCGA-E1-A7YL-01	6.797	492	1
TCGA-BRCA	TCGA-A2-A04T-01	6.8455	2246	0
TCGA-KIRC	TCGA-CJ-6030-01	6.6843	2299	1
TCGA-KIPAN	TCGA-CJ-6030-01	6.6843	2299	1
TCGA-BRCA	TCGA-OL-A5S0-01	7.0712	620	0
TCGA-MESO	TCGA-UD-AAC5-01	7.7968	253	1
TCGA-LIHC	TCGA-DD-AADI-01	6.5215	1085	0
TCGA-PRAD	TCGA-FC-7961-01	6.942	469	0
TCGA-LIHC	TCGA-CC-A7IG-01	6.7133	299	1
TCGA-LIHC	TCGA-MR-A8JO-01	6.213	330	0
TCGA-BLCA	TCGA-GC-A3YS-01	7.3496	758	0
TCGA-ACC	TCGA-OR-A5LG-01	6.6608	1589	0
TCGA-UVM	TCGA-VD-A8KH-01	6.1813	1158	0
TCGA-SKCM-M	TCGA-EE-A3JB-06	7.5553	6138	0
TCGA-SKCM	TCGA-EE-A3JB-06	7.5553	6138	0
TCGA-KIRC	TCGA-CJ-4918-01	6.6668	93	1
TCGA-KIPAN	TCGA-CJ-4918-01	6.6668	93	1
TCGA-BRCA	TCGA-A8-A07J-01	6.8886	365	0
TCGA-BRCA	TCGA-E9-A229-01	7.4368	1148	0
TCGA-ESCA	TCGA-L5-A4OU-01	7.5599	882	0
TCGA-STES	TCGA-L5-A4OU-01	7.5599	882	0
TCGA-SARC	TCGA-X9-A971-01	8.0435	831	0
TCGA-HNSC	TCGA-D6-6826-01	7.7616	348	1
TCGA-BRCA	TCGA-A2-A0SX-01	7.1597	1534	0
TCGA-OV	TCGA-57-1994-01	7.8121	761	0
TCGA-SKCM-M	TCGA-ER-A19E-06	7.902	396	1
TCGA-SKCM	TCGA-ER-A19E-06	7.902	396	1
TCGA-PRAD	TCGA-KK-A8I4-01	7.0883	2259	0
TCGA-KIRP	TCGA-UZ-A9PM-01	6.3189	3811	0
TCGA-KIPAN	TCGA-UZ-A9PM-01	6.3189	3811	0
TCGA-KIRC	TCGA-B8-5545-01	7.0545	1525	0
TCGA-KIPAN	TCGA-B8-5545-01	7.0545	1525	0
TCGA-PAAD	TCGA-US-A776-01	7.1718	1216	0
TCGA-STAD	TCGA-BR-8484-01	7.8966	766	1
TCGA-STES	TCGA-BR-8484-01	7.8966	766	1
TCGA-LUAD	TCGA-55-7724-01	6.4951	705	0
TCGA-COAD	TCGA-F4-6703-01	7.436	1456	0
TCGA-COADREAD	TCGA-F4-6703-01	7.436	1456	0
TCGA-STAD	TCGA-HU-A4G8-01	7.875	690	0
TCGA-STES	TCGA-HU-A4G8-01	7.875	690	0
TCGA-THCA	TCGA-FY-A3I4-01	7.1928	542	0
TCGA-SARC	TCGA-DX-AB2Q-01	7.9023	2030	0
TCGA-LUAD	TCGA-44-6776-01	6.4951	2616	0
TCGA-LUAD	TCGA-49-4514-01	6.6936	1700	0
TCGA-PRAD	TCGA-HC-A6AQ-01	6.2702	106	0
TCGA-LUAD	TCGA-05-4396-01	7.0785	303	1
TCGA-THYM	TCGA-XM-A8RL-01	7.6953	2562	0
TCGA-PRAD	TCGA-EJ-7789-01	6.9028	1105	0
TCGA-LUSC	TCGA-85-A50Z-01	7.1544	493	0
TCGA-SKCM-M	TCGA-FS-A1ZT-06	7.2836	1617	0
TCGA-SKCM	TCGA-FS-A1ZT-06	7.2836	1617	0
TCGA-KIRC	TCGA-B2-3923-01	5.2772	992	0
TCGA-KIPAN	TCGA-B2-3923-01	5.2772	992	0
TCGA-LUAD	TCGA-55-8204-01	7.1796	515	0
TCGA-LUSC	TCGA-77-7337-01	7.6198	3253	1
TCGA-UCEC	TCGA-QS-A5YR-01	7.0641	719	0
TCGA-LUAD	TCGA-L4-A4E6-01	6.3518	435	0
TCGA-ESCA	TCGA-L5-A8NJ-01	8.1776	501	0
TCGA-STES	TCGA-L5-A8NJ-01	8.1776	501	0
TCGA-SARC	TCGA-DX-A1L0-01	7.7268	564	1
TCGA-BRCA	TCGA-BH-A0AW-01	6.7718	622	0
TCGA-CESC	TCGA-VS-A9UJ-01	7.6277	52	1
TCGA-OV	TCGA-25-2392-01	7.1911	31	1
TCGA-PAAD	TCGA-XD-AAUH-01	6.5246	395	0
TCGA-BRCA	TCGA-BH-A2L8-01	7.0309	612	0
TCGA-STAD	TCGA-HU-A4GC-01	6.7995	99	0
TCGA-STES	TCGA-HU-A4GC-01	6.7995	99	0
TCGA-SKCM-P	TCGA-EB-A5SE-01	7.2797	401	1
TCGA-SKCM	TCGA-EB-A5SE-01	7.2797	401	1
TCGA-BRCA	TCGA-BH-A0B6-01	7.0442	2483	0
TCGA-COAD	TCGA-AA-3492-01	7.3446	92	1
TCGA-COADREAD	TCGA-AA-3492-01	7.3446	92	1
TCGA-COAD	TCGA-G4-6293-01	7.216	4051	0
TCGA-COADREAD	TCGA-G4-6293-01	7.216	4051	0
TCGA-STAD	TCGA-CG-5726-01	8.5898	881	1
TCGA-STES	TCGA-CG-5726-01	8.5898	881	1
TCGA-LGG	TCGA-CS-5396-01	6.2778	1631	0
TCGA-GBMLGG	TCGA-CS-5396-01	6.2778	1631	0
TCGA-SARC	TCGA-DX-AB32-01	7.4408	3102	0
TCGA-HNSC	TCGA-CN-6998-01	7.1895	357	1
TCGA-HNSC	TCGA-BB-7866-01	7.8351	1368	0
TCGA-OV	TCGA-31-1959-01	7.6757	67	0
TCGA-HNSC	TCGA-HD-7832-01	8.1088	836	0
TCGA-KIRP	TCGA-Y8-A895-01	6.9811	484	0
TCGA-KIPAN	TCGA-Y8-A895-01	6.9811	484	0
TCGA-PCPG	TCGA-QR-A6H1-01	6.8638	431	0
TCGA-BRCA	TCGA-AO-A0JL-01	6.6989	1683	0
TCGA-BRCA	TCGA-BH-A0BS-01	7.2217	2612	0
TCGA-LUSC	TCGA-56-8623-01	6.4531	692	1
TCGA-THCA	TCGA-DJ-A4UL-01	7.0087	939	0
TCGA-LAML	TCGA-AB-2956-03	8.1607	183	1
TCGA-STAD	TCGA-CD-A48C-01	7.0128	353	1
TCGA-STES	TCGA-CD-A48C-01	7.0128	353	1
TCGA-DLBC	TCGA-FF-8046-01	6.0084	751	0
TCGA-MESO	TCGA-TS-A7P1-01	7.5642	563	1
TCGA-STAD	TCGA-FP-8099-01	8.0888	519	0
TCGA-STES	TCGA-FP-8099-01	8.0888	519	0
TCGA-BRCA	TCGA-B6-A0IG-01	7.0069	4456	1
TCGA-PAAD	TCGA-XN-A8T5-01	6.7973	720	0
TCGA-PRAD	TCGA-ZG-A9M4-01	6.8278	547	0
TCGA-PRAD	TCGA-EJ-7793-01	6.4876	114	0
TCGA-COAD	TCGA-AA-3496-01	7.5323	31	0
TCGA-COADREAD	TCGA-AA-3496-01	7.5323	31	0
TCGA-OV	TCGA-23-1022-01	6.3649	1511	1
TCGA-PCPG	TCGA-QR-A7IN-01	6.9061	377	0
TCGA-BLCA	TCGA-ZF-AA4N-01	7.2484	88	1
TCGA-BLCA	TCGA-XF-AAMG-01	7.5675	3364	0
TCGA-BLCA	TCGA-GC-A3RC-01	7.3555	484	0
TCGA-THCA	TCGA-DJ-A13T-01	7.2449	1709	0
TCGA-PCPG	TCGA-QR-A6GT-01	6.8154	4185	0
TCGA-UCEC	TCGA-AX-A3FX-01	6.3683	1333	1
TCGA-PRAD	TCGA-HC-7210-01	7.249	868	0
TCGA-KIRC	TCGA-CJ-4923-01	6.732	572	1
TCGA-KIPAN	TCGA-CJ-4923-01	6.732	572	1
TCGA-COAD	TCGA-G4-6625-01	7.4654	2792	0
TCGA-COADREAD	TCGA-G4-6625-01	7.4654	2792	0
TCGA-LUSC	TCGA-98-A538-01	7.8418	826	0
TCGA-THCA	TCGA-ET-A3BO-01	6.8181	1533	0
TCGA-SKCM-M	TCGA-EB-A5VV-06	6.5828	214	0
TCGA-SKCM	TCGA-EB-A5VV-06	6.5828	214	0
TCGA-UCEC	TCGA-KP-A3W0-01	6.3942	404	0
TCGA-HNSC	TCGA-CV-6436-01	6.5715	1899	0
TCGA-THYM	TCGA-XM-A8RC-01	7.3504	2963	0
TCGA-PRAD	TCGA-EJ-7782-01	7.1474	1167	0
TCGA-LGG	TCGA-HW-8322-01	6.9051	758	0
TCGA-GBMLGG	TCGA-HW-8322-01	6.9051	758	0
TCGA-KIRC	TCGA-BP-4159-01	6.0159	2601	1
TCGA-KIPAN	TCGA-BP-4159-01	6.0159	2601	1
TCGA-CESC	TCGA-Q1-A6DT-01	7.1814	275	1
TCGA-BLCA	TCGA-CF-A8HY-01	6.8452	345	0
TCGA-ESCA	TCGA-L5-A8NN-01	7.9279	167	0
TCGA-STES	TCGA-L5-A8NN-01	7.9279	167	0
TCGA-BLCA	TCGA-ZF-A9RL-01	7.1674	2703	0
TCGA-OV	TCGA-25-1633-01	7.5764	1891	1
TCGA-OV	TCGA-25-2396-01	6.8647	92	1
TCGA-BRCA	TCGA-OL-A66L-01	6.6135	1301	0
TCGA-BRCA	TCGA-BH-A0DO-01	7.3867	1644	0
TCGA-PRAD	TCGA-HC-A8CY-01	6.9437	290	0
TCGA-SARC	TCGA-X6-A8C5-01	6.4785	1547	0
TCGA-THCA	TCGA-FK-A4UB-01	6.9592	3531	0
TCGA-COAD	TCGA-DM-A28E-01	7.3133	3648	0
TCGA-COADREAD	TCGA-DM-A28E-01	7.3133	3648	0
TCGA-LGG	TCGA-S9-A6U9-01	6.2112	2918	0
TCGA-GBMLGG	TCGA-S9-A6U9-01	6.2112	2918	0
TCGA-LIHC	TCGA-5R-AA1C-01	6.169	520	0
TCGA-COAD	TCGA-CK-6747-01	7.9926	2523	0
TCGA-COADREAD	TCGA-CK-6747-01	7.9926	2523	0
TCGA-PCPG	TCGA-WB-A819-01	6.6349	1031	0
TCGA-KIRP	TCGA-Y8-A8S1-01	6.6343	404	0
TCGA-KIPAN	TCGA-Y8-A8S1-01	6.6343	404	0
TCGA-CHOL	TCGA-W5-AA2I-01	6.9179	1939	1
TCGA-KIRC	TCGA-CJ-5680-01	7.0043	768	1
TCGA-KIPAN	TCGA-CJ-5680-01	7.0043	768	1
TCGA-LUSC	TCGA-34-5234-01	4.7339	2271	0
TCGA-HNSC	TCGA-CV-7097-01	7.7948	385	1
TCGA-PAAD	TCGA-IB-8126-01	5.4822	462	0
TCGA-BLCA	TCGA-XF-A9T0-01	7.0323	799	0
TCGA-SKCM-P	TCGA-FW-A5DX-01	6.9075	640	0
TCGA-SKCM	TCGA-FW-A5DX-01	6.9075	640	0
TCGA-PAAD	TCGA-HZ-7920-01	6.8732	236	1
TCGA-LUAD	TCGA-62-A46O-01	7.3055	1454	1
TCGA-OV	TCGA-04-1517-01	7.2245	608	1
TCGA-LIHC	TCGA-G3-AAV1-01	6.1129	359	1
TCGA-LGG	TCGA-HT-7469-01	7.1913	351	1
TCGA-GBMLGG	TCGA-HT-7469-01	7.1913	351	1
TCGA-LUAD	TCGA-78-7155-01	7.8807	1171	1
TCGA-LUSC	TCGA-56-7822-01	7.0071	532	1
TCGA-LUSC	TCGA-56-A62T-01	7.5817	440	0
TCGA-BRCA	TCGA-LL-A73Y-01	7.1999	477	0
TCGA-LIHC	TCGA-BC-A10X-01	5.844	770	1
TCGA-BLCA	TCGA-UY-A78M-01	6.934	690	1
TCGA-BRCA	TCGA-BH-A0DK-01	6.8239	423	0
TCGA-BLCA	TCGA-K4-A4AC-01	7.7523	278	1
TCGA-KIRP	TCGA-B3-4104-01	7.295	1049	0
TCGA-KIPAN	TCGA-B3-4104-01	7.295	1049	0
TCGA-LUSC	TCGA-85-A4JB-01	7.2929	942	0
TCGA-LUAD	TCGA-62-A472-01	7.0104	910	0
TCGA-OV	TCGA-30-1714-01	5.5341	1158	1
TCGA-LUAD	TCGA-NJ-A55R-01	6.4164	603	0
TCGA-OV	TCGA-23-1026-01	7.1695	816	0
TCGA-STAD	TCGA-VQ-A8E3-01	8.3004	661	1
TCGA-STES	TCGA-VQ-A8E3-01	8.3004	661	1
TCGA-READ	TCGA-F5-6702-01	7.2934	452	0
TCGA-COADREAD	TCGA-F5-6702-01	7.2934	452	0
TCGA-CESC	TCGA-VS-A9UQ-01	7.7764	1263	0
TCGA-BRCA	TCGA-BH-A0BG-01	6.993	1871	0
TCGA-UCEC	TCGA-AJ-A23N-01	7.2728	439	1
TCGA-CHOL	TCGA-W5-AA34-01	6.6045	555	1
TCGA-COAD	TCGA-CA-5255-01	6.9479	376	0
TCGA-COADREAD	TCGA-CA-5255-01	6.9479	376	0
TCGA-OV	TCGA-24-1431-01	5.7729	567	1
TCGA-COAD	TCGA-CK-4947-01	7.5789	534	0
TCGA-COADREAD	TCGA-CK-4947-01	7.5789	534	0
TCGA-SARC	TCGA-IE-A6BZ-01	7.4192	605	0
TCGA-UVM	TCGA-WC-A88A-01	6.7574	82	1
TCGA-LAML	TCGA-AB-2808-03	6.588	2861	0
TCGA-BLCA	TCGA-G2-A2ES-01	7.1536	1004	1
TCGA-SARC	TCGA-DX-A8BM-01	7.5248	1456	0
TCGA-PRAD	TCGA-V1-A8MU-01	6.8614	1876	0
TCGA-BRCA	TCGA-A8-A06Z-01	7.2327	31	0
TCGA-UCEC	TCGA-KP-A3W1-01	6.2856	288	0
TCGA-GBM	TCGA-32-2634-01	7.3033	693	0
TCGA-GBMLGG	TCGA-32-2634-01	7.3033	693	0
TCGA-READ	TCGA-G5-6233-01	7.3522	556	1
TCGA-COADREAD	TCGA-G5-6233-01	7.3522	556	1
TCGA-LUAD	TCGA-62-8395-01	7.0481	1216	0
TCGA-OV	TCGA-13-0800-01	6.6642	2661	0
TCGA-MESO	TCGA-3U-A98H-01	6.7057	1156	1
TCGA-LUSC	TCGA-77-8136-01	7.523	1189	1
TCGA-UCEC	TCGA-D1-A2G0-01	7.4556	1484	0
TCGA-THCA	TCGA-ET-A40P-01	6.8247	1338	0
TCGA-OV	TCGA-13-0765-01	5.8607	1389	1
TCGA-KIRC	TCGA-CW-5589-01	6.756	2378	0
TCGA-KIPAN	TCGA-CW-5589-01	6.756	2378	0
TCGA-STAD	TCGA-VQ-A8E0-01	7.3315	562	1
TCGA-STES	TCGA-VQ-A8E0-01	7.3315	562	1
TCGA-TGCT	TCGA-2G-AAHG-01	8.1033	1819	0
TCGA-OV	TCGA-61-1998-01	7.0779	168	0
TCGA-OV	TCGA-23-1029-01	7.4893	268	0
TCGA-LUAD	TCGA-95-7567-01	7.177	568	0
TCGA-BRCA	TCGA-E2-A14U-01	7.1086	1318	0
TCGA-COAD	TCGA-AD-6888-01	6.9438	472	1
TCGA-COADREAD	TCGA-AD-6888-01	6.9438	472	1
TCGA-STAD	TCGA-KB-A93G-01	7.6375	613	0
TCGA-STES	TCGA-KB-A93G-01	7.6375	613	0
TCGA-COAD	TCGA-F4-6809-01	7.2162	403	1
TCGA-COADREAD	TCGA-F4-6809-01	7.2162	403	1
TCGA-KIRC	TCGA-A3-3385-01	6.56	1993	0
TCGA-KIPAN	TCGA-A3-3385-01	6.56	1993	0
TCGA-LUAD	TCGA-50-5051-01	6.5993	478	1
TCGA-KIRC	TCGA-BP-5000-01	6.0264	563	0
TCGA-KIPAN	TCGA-BP-5000-01	6.0264	563	0
TCGA-HNSC	TCGA-CN-A63U-01	7.3638	964	0
TCGA-COAD	TCGA-CK-5914-01	7.7799	669	0
TCGA-COADREAD	TCGA-CK-5914-01	7.7799	669	0
TCGA-LGG	TCGA-HT-7478-01	5.5747	194	0
TCGA-GBMLGG	TCGA-HT-7478-01	5.5747	194	0
TCGA-OV	TCGA-23-1030-01	6.8829	886	0
TCGA-KIRP	TCGA-5P-A9K6-01	6.338	1914	0
TCGA-KIPAN	TCGA-5P-A9K6-01	6.338	1914	0
TCGA-CESC	TCGA-VS-A8EG-01	8.0133	1386	0
TCGA-UCEC	TCGA-D1-A3JP-01	6.5886	515	0
TCGA-KIRP	TCGA-IZ-8195-01	5.7244	677	0
TCGA-KIPAN	TCGA-IZ-8195-01	5.7244	677	0
TCGA-LUSC	TCGA-43-8116-01	7.7008	358	0
TCGA-LUSC	TCGA-18-3410-01	7.2164	146	1
TCGA-STAD	TCGA-BR-7704-01	7.2716	1072	0
TCGA-STES	TCGA-BR-7704-01	7.2716	1072	0
TCGA-OV	TCGA-61-2003-01	7.2166	122	0
TCGA-KIRC	TCGA-MW-A4EC-01	6.7978	498	0
TCGA-KIPAN	TCGA-MW-A4EC-01	6.7978	498	0
TCGA-ESCA	TCGA-L5-A4OM-01	8.3565	1458	1
TCGA-STES	TCGA-L5-A4OM-01	8.3565	1458	1
TCGA-PCPG	TCGA-WB-A80Q-01	6.4576	3880	0
TCGA-UCEC	TCGA-BK-A13B-01	6.6536	966	0
TCGA-CESC	TCGA-EX-A69L-01	6.9028	602	0
TCGA-BLCA	TCGA-FJ-A871-01	7.4225	272	1
TCGA-PCPG	TCGA-WB-A817-01	6.7394	1310	0
TCGA-LUAD	TCGA-55-A48Y-01	6.44	630	0
TCGA-THCA	TCGA-BJ-A45F-01	6.081	105	0
TCGA-KIRC	TCGA-AK-3447-01	3.7813	1217	0
TCGA-KIPAN	TCGA-AK-3447-01	3.7813	1217	0
TCGA-CESC	TCGA-Q1-A73O-01	7.7469	428	0
TCGA-COAD	TCGA-D5-6532-01	7.6086	555	0
TCGA-COADREAD	TCGA-D5-6532-01	7.6086	555	0
TCGA-PCPG	TCGA-QR-A70J-01	7.0452	399	0
TCGA-CESC	TCGA-VS-A8QC-01	7.4303	350	1
TCGA-SKCM-M	TCGA-W3-AA1O-06	7.4192	122	1
TCGA-SKCM	TCGA-W3-AA1O-06	7.4192	122	1
TCGA-LUAD	TCGA-86-A456-01	6.8154	896	0
TCGA-LUSC	TCGA-33-AASB-01	7.2639	211	1
TCGA-CESC	TCGA-EA-A5ZE-01	7.315	829	0
TCGA-MESO	TCGA-XT-AASU-01	7.1076	142	1
TCGA-THCA	TCGA-FE-A22Z-01	6.8303	2243	0
TCGA-KIRP	TCGA-B9-4617-01	5.9481	35	0
TCGA-KIPAN	TCGA-B9-4617-01	5.9481	35	0
TCGA-PCPG	TCGA-RW-A8AZ-01	6.6383	88	1
TCGA-LUAD	TCGA-50-5068-01	5.3847	1499	1
TCGA-LUSC	TCGA-NK-A5CR-01	7.4044	2542	0
TCGA-LIHC	TCGA-ZS-A9CF-01	6.3785	2412	0
TCGA-BRCA	TCGA-AR-A24Q-01	7.2369	3172	0
TCGA-SKCM-M	TCGA-D3-A2J7-06	6.6528	3136	1
TCGA-SKCM	TCGA-D3-A2J7-06	6.6528	3136	1
TCGA-LUSC	TCGA-33-4586-01	6.9379	428	1
TCGA-LUSC	TCGA-56-7580-01	7.5753	925	0
TCGA-THCA	TCGA-E8-A416-01	6.8784	952	0
TCGA-PAAD	TCGA-S4-A8RM-01	7.0819	737	0
TCGA-LGG	TCGA-DU-A5TW-01	6.2528	760	0
TCGA-GBMLGG	TCGA-DU-A5TW-01	6.2528	760	0
TCGA-OV	TCGA-24-2038-01	6.8204	1354	1
TCGA-SARC	TCGA-DX-AB2S-01	6.6672	280	0
TCGA-PRAD	TCGA-G9-6329-01	6.7518	1266	0
TCGA-KIRP	TCGA-MH-A560-01	5.7705	924	0
TCGA-KIPAN	TCGA-MH-A560-01	5.7705	924	0
TCGA-BLCA	TCGA-GD-A3OP-01	6.8104	64	0
TCGA-LUSC	TCGA-90-7769-01	7.1996	358	0
TCGA-HNSC	TCGA-CR-6467-01	7.5501	1777	0
TCGA-LGG	TCGA-S9-A6TX-01	5.7963	1245	0
TCGA-GBMLGG	TCGA-S9-A6TX-01	5.7963	1245	0
TCGA-ACC	TCGA-OR-A5JC-01	6.8177	1750	1
TCGA-DLBC	TCGA-GS-A9TV-01	7.4517	730	0
TCGA-LUSC	TCGA-37-4135-01	5.3607	207	0
TCGA-LGG	TCGA-RY-A83Z-01	6.0919	301	0
TCGA-GBMLGG	TCGA-RY-A83Z-01	6.0919	301	0
TCGA-CESC	TCGA-JX-A5QV-01	7.1974	636	0
TCGA-HNSC	TCGA-CN-6988-01	7.3175	318	0
TCGA-SKCM-M	TCGA-DA-A3F5-06	7.0801	6873	1
TCGA-SKCM	TCGA-DA-A3F5-06	7.0801	6873	1
TCGA-SARC	TCGA-DX-A8BQ-01	6.9952	1579	0
TCGA-BRCA	TCGA-EW-A1P5-01	7.5344	703	0
TCGA-PCPG	TCGA-QR-A6GS-01	7.1697	38	0
TCGA-BLCA	TCGA-FD-A3SL-01	6.7111	712	1
TCGA-THCA	TCGA-ET-A39L-01	7.3369	3299	0
TCGA-BRCA	TCGA-BH-A1FN-01	7.6049	2192	1
TCGA-MESO	TCGA-TS-A8AF-01	7.4705	358	1
TCGA-CESC	TCGA-EK-A2GZ-01	6.9196	383	0
TCGA-UCS	TCGA-N5-A4RM-01	6.7478	148	1
TCGA-LIHC	TCGA-DD-AACN-01	7.0042	1302	0
TCGA-KIRC	TCGA-MM-A564-01	6.0552	607	0
TCGA-KIPAN	TCGA-MM-A564-01	6.0552	607	0
TCGA-COAD	TCGA-3L-AA1B-01	7.3858	475	0
TCGA-COADREAD	TCGA-3L-AA1B-01	7.3858	475	0
TCGA-GBM	TCGA-06-0141-01	5.477	313	1
TCGA-GBMLGG	TCGA-06-0141-01	5.477	313	1
TCGA-HNSC	TCGA-DQ-7596-01	7.4135	1265	0
TCGA-PAAD	TCGA-HZ-8002-01	7.0157	366	1
TCGA-PAAD	TCGA-3A-A9IH-01	6.4601	1021	0
TCGA-UCEC	TCGA-B5-A3FC-01	6.6542	2185	0
TCGA-THCA	TCGA-BJ-A0ZC-01	6.8855	352	0
TCGA-BLCA	TCGA-XF-A9T3-01	7.3627	68	0
TCGA-LUSC	TCGA-98-8020-01	7.5591	84	1
TCGA-HNSC	TCGA-CV-5970-01	7.0657	406	1
TCGA-SARC	TCGA-DX-AB2G-01	6.9311	478	0
TCGA-BRCA	TCGA-A7-A4SE-01	7.5109	644	0
TCGA-BRCA	TCGA-A1-A0SJ-01	7.4345	416	0
TCGA-LUAD	TCGA-J2-A4AG-01	6.7458	988	0
TCGA-READ	TCGA-EI-6510-01	7.2972	556	0
TCGA-COADREAD	TCGA-EI-6510-01	7.2972	556	0
TCGA-COAD	TCGA-G4-6588-01	7.8872	796	0
TCGA-COADREAD	TCGA-G4-6588-01	7.8872	796	0
TCGA-LIHC	TCGA-RC-A7S9-01	6.6458	640	0
TCGA-DLBC	TCGA-GS-A9TZ-01	7.1957	765	0
TCGA-LUSC	TCGA-22-5471-01	6.9831	1845	0
TCGA-BRCA	TCGA-E2-A570-01	7.1865	931	0
TCGA-STAD	TCGA-VQ-A91V-01	7.362	1297	0
TCGA-STES	TCGA-VQ-A91V-01	7.362	1297	0
TCGA-HNSC	TCGA-CV-7425-01	7.0876	1718	1
TCGA-PCPG	TCGA-QR-A6H4-01	6.67	2661	0
TCGA-BRCA	TCGA-BH-A201-01	7.3347	856	0
TCGA-OV	TCGA-61-2016-01	7.2622	36	1
TCGA-HNSC	TCGA-CN-4733-01	7.1796	1586	0
TCGA-CESC	TCGA-IR-A3LL-01	7.3001	1106	0
TCGA-LUAD	TCGA-05-4405-01	7.1976	610	0
TCGA-GBM	TCGA-06-0125-01	7.4722	1448	1
TCGA-GBMLGG	TCGA-06-0125-01	7.4722	1448	1
TCGA-THYM	TCGA-XU-A92Z-01	7.714	3663	0
TCGA-LIHC	TCGA-DD-AA3A-01	7.1655	410	1
TCGA-PCPG	TCGA-RW-A68A-01	6.7982	762	0
TCGA-OV	TCGA-13-0885-01	6.0225	3388	0
TCGA-STAD	TCGA-FP-A4BF-01	6.9784	168	1
TCGA-STES	TCGA-FP-A4BF-01	6.9784	168	1
TCGA-BRCA	TCGA-A8-A09E-01	7.4969	1492	0
TCGA-THYM	TCGA-ZB-A964-01	8.0697	1287	0
TCGA-KIRP	TCGA-Y8-A8RZ-01	6.1927	205	0
TCGA-KIPAN	TCGA-Y8-A8RZ-01	6.1927	205	0
TCGA-HNSC	TCGA-CR-5243-01	7.8198	2562	0
TCGA-HNSC	TCGA-MT-A51W-01	6.8571	437	0
TCGA-THYM	TCGA-ZB-A96C-01	7.409	2163	0
TCGA-BRCA	TCGA-D8-A27V-01	7.4942	381	0
TCGA-BLCA	TCGA-ZF-AA4V-01	7.3746	1806	0
TCGA-LUAD	TCGA-50-5944-01	6.7372	1750	0
TCGA-STAD	TCGA-RD-A8N1-01	7.5307	3519	0
TCGA-STES	TCGA-RD-A8N1-01	7.5307	3519	0
TCGA-STAD	TCGA-BR-8687-01	7.1509	250	1
TCGA-STES	TCGA-BR-8687-01	7.1509	250	1
TCGA-ACC	TCGA-OR-A5JV-01	5.9809	2023	0
TCGA-THCA	TCGA-EM-A2CO-01	6.1532	184	0
TCGA-LUAD	TCGA-86-7955-01	7.0386	1072	0
TCGA-STAD	TCGA-BR-A4IY-01	7.429	392	0
TCGA-STES	TCGA-BR-A4IY-01	7.429	392	0
TCGA-PRAD	TCGA-V1-A9OQ-01	6.0655	371	0
TCGA-LGG	TCGA-FG-A6IZ-01	5.8953	457	0
TCGA-GBMLGG	TCGA-FG-A6IZ-01	5.8953	457	0
TCGA-CESC	TCGA-C5-A1M5-01	7.6074	2052	1
TCGA-HNSC	TCGA-DQ-7592-01	7.7667	1143	0
TCGA-BRCA	TCGA-E2-A14Y-01	7.1001	2109	0
TCGA-THCA	TCGA-EM-A3AN-01	6.9783	1006	0
TCGA-PRAD	TCGA-YL-A9WI-01	6.8324	1623	0
TCGA-LUAD	TCGA-55-7727-01	6.8817	119	0
TCGA-PCPG	TCGA-QR-A6H0-01	6.5147	280	0
TCGA-LGG	TCGA-CS-4941-01	6.8095	234	1
TCGA-GBMLGG	TCGA-CS-4941-01	6.8095	234	1
TCGA-OV	TCGA-59-2351-01	7.6074	3532	0
TCGA-ACC	TCGA-OU-A5PI-01	6.2722	1171	0
TCGA-THYM	TCGA-XU-A92Q-01	7.2449	1092	0
TCGA-LUAD	TCGA-55-8510-01	6.8889	539	0
TCGA-BRCA	TCGA-MS-A51U-01	7.4044	681	0
TCGA-BRCA	TCGA-A8-A06Y-01	6.9213	791	0
TCGA-BLCA	TCGA-XF-AAMW-01	7.4425	253	1
TCGA-BRCA	TCGA-GI-A2C8-01	7.064	225	0
TCGA-LAML	TCGA-AB-3012-03	7.6804	1887	0
TCGA-HNSC	TCGA-CN-4722-01	7.141	1483	0
TCGA-THCA	TCGA-EL-A3ZM-01	6.2945	1096	0
TCGA-THCA	TCGA-DJ-A13X-01	7.0884	253	0
TCGA-SARC	TCGA-DX-A1L3-01	6.9033	1020	1
TCGA-HNSC	TCGA-HD-A633-01	7.4008	421	0
TCGA-BRCA	TCGA-AR-A1AM-01	7.4118	2991	0
TCGA-OV	TCGA-13-0890-01	7.5407	4424	0
TCGA-TGCT	TCGA-VF-A8AE-01	7.4751	727	0
TCGA-LGG	TCGA-DH-A7UT-01	5.7271	531	1
TCGA-GBMLGG	TCGA-DH-A7UT-01	5.7271	531	1
TCGA-COAD	TCGA-A6-6138-01	7.5618	685	0
TCGA-COADREAD	TCGA-A6-6138-01	7.5618	685	0
TCGA-LGG	TCGA-DU-5871-01	6.1837	576	0
TCGA-GBMLGG	TCGA-DU-5871-01	6.1837	576	0
TCGA-HNSC	TCGA-CV-7238-01	7.1432	2727	0
TCGA-LAML	TCGA-AB-2841-03	7.5268	1401	1
TCGA-THCA	TCGA-EL-A3T7-01	6.887	1256	0
TCGA-COAD	TCGA-F4-6808-01	7.302	1024	0
TCGA-COADREAD	TCGA-F4-6808-01	7.302	1024	0
TCGA-HNSC	TCGA-CN-5367-01	7.033	352	1
TCGA-LUAD	TCGA-MP-A4T8-01	7.3494	161	1
TCGA-HNSC	TCGA-D6-A74Q-01	7.1044	710	0
TCGA-LUAD	TCGA-86-8279-01	7.5867	949	0
TCGA-PCPG	TCGA-W2-A7HB-01	7.4352	604	0
TCGA-DLBC	TCGA-GR-A4D4-01	7.3327	1581	0
TCGA-HNSC	TCGA-CR-5250-01	7.701	799	0
TCGA-KIRC	TCGA-B0-5100-01	6.7471	1913	1
TCGA-KIPAN	TCGA-B0-5100-01	6.7471	1913	1
TCGA-PRAD	TCGA-EJ-7218-01	6.4426	2542	0
TCGA-PRAD	TCGA-XK-AAJR-01	6.7008	1124	0
TCGA-LUAD	TCGA-55-A494-01	7.1016	481	0
TCGA-KIRC	TCGA-BP-4991-01	7.1538	1413	0
TCGA-KIPAN	TCGA-BP-4991-01	7.1538	1413	0
TCGA-LUAD	TCGA-44-3917-01	4.6185	1183	0
TCGA-OV	TCGA-61-2000-01	6.8603	441	0
TCGA-KIRP	TCGA-A4-7288-01	7.5431	1857	0
TCGA-KIPAN	TCGA-A4-7288-01	7.5431	1857	0
TCGA-LUAD	TCGA-75-5125-01	7.157	2027	1
TCGA-KIRC	TCGA-B0-5400-01	6.3549	1733	0
TCGA-KIPAN	TCGA-B0-5400-01	6.3549	1733	0
TCGA-COAD	TCGA-G4-6317-01	7.4859	1095	0
TCGA-COADREAD	TCGA-G4-6317-01	7.4859	1095	0
TCGA-STAD	TCGA-HU-8244-01	7.4466	742	0
TCGA-STES	TCGA-HU-8244-01	7.4466	742	0
TCGA-OV	TCGA-25-2404-01	7.6247	883	1
TCGA-HNSC	TCGA-CV-7437-01	7.3292	506	1
TCGA-THCA	TCGA-EL-A3T3-01	6.5491	4017	0
TCGA-LIHC	TCGA-K7-A5RG-01	6.3957	519	0
TCGA-PRAD	TCGA-ZG-A9LU-01	6.6033	579	0
TCGA-OV	TCGA-13-0768-01	6.3243	1784	1
TCGA-BRCA	TCGA-B6-A409-01	7.1747	573	1
TCGA-PRAD	TCGA-KC-A7F5-01	6.858	91	0
TCGA-CESC	TCGA-C5-A7X8-01	7.1695	83	0
TCGA-KIRC	TCGA-BP-4330-01	7.0008	1888	0
TCGA-KIPAN	TCGA-BP-4330-01	7.0008	1888	0
TCGA-LUSC	TCGA-21-1078-01	7.304	474	1
TCGA-LUSC	TCGA-34-2600-01	7.5994	1874	1
TCGA-CESC	TCGA-EA-A3HS-01	7.2754	959	0
TCGA-SKCM-M	TCGA-W3-AA1W-06	7.0285	6666	0
TCGA-SKCM	TCGA-W3-AA1W-06	7.0285	6666	0
TCGA-SARC	TCGA-3B-A9HZ-01	6.5013	1170	0
TCGA-KIRC	TCGA-CJ-4873-01	6.292	2259	0
TCGA-KIPAN	TCGA-CJ-4873-01	6.292	2259	0
TCGA-KIRP	TCGA-SX-A7SL-01	6.556	823	0
TCGA-KIPAN	TCGA-SX-A7SL-01	6.556	823	0
TCGA-LAML	TCGA-AB-2836-03	7.7349	518	1
TCGA-BRCA	TCGA-BH-A1EX-01	6.7954	1508	1
TCGA-LGG	TCGA-HW-8321-01	6.0259	1294	0
TCGA-GBMLGG	TCGA-HW-8321-01	6.0259	1294	0
TCGA-COAD	TCGA-CK-4952-01	8.2168	475	0
TCGA-COADREAD	TCGA-CK-4952-01	8.2168	475	0
TCGA-COAD	TCGA-G4-6309-01	7.6739	2600	0
TCGA-COADREAD	TCGA-G4-6309-01	7.6739	2600	0
TCGA-LGG	TCGA-EZ-7264-01	6.6565	1201	0
TCGA-GBMLGG	TCGA-EZ-7264-01	6.6565	1201	0
TCGA-THYM	TCGA-X7-A8M0-01	6.9728	441	0
TCGA-THCA	TCGA-E8-A433-01	6.2216	951	0
TCGA-LUAD	TCGA-55-8615-01	7.1708	446	0
TCGA-PAAD	TCGA-HZ-A4BK-01	7.1079	657	0
TCGA-THCA	TCGA-EL-A3GQ-01	6.8542	1528	0
TCGA-LUAD	TCGA-MP-A4TF-01	7.3925	336	1
TCGA-BLCA	TCGA-G2-A2EO-01	7.0299	1804	1
TCGA-HNSC	TCGA-D6-A6EO-01	7.3112	759	0
TCGA-LIHC	TCGA-RC-A7SF-01	5.88	579	0
TCGA-SKCM-P	TCGA-EB-A24C-01	7.1439	632	0
TCGA-SKCM	TCGA-EB-A24C-01	7.1439	632	0
TCGA-KIRC	TCGA-AK-3443-01	5.682	1423	0
TCGA-KIPAN	TCGA-AK-3443-01	5.682	1423	0
TCGA-BRCA	TCGA-A7-A0CJ-01	7.333	931	0
TCGA-LGG	TCGA-CS-6666-01	6.6461	1428	0
TCGA-GBMLGG	TCGA-CS-6666-01	6.6461	1428	0
TCGA-KIRC	TCGA-BP-4992-01	6.0815	501	0
TCGA-KIPAN	TCGA-BP-4992-01	6.0815	501	0
TCGA-COAD	TCGA-CM-5868-01	7.4439	518	0
TCGA-COADREAD	TCGA-CM-5868-01	7.4439	518	0
TCGA-UVM	TCGA-WC-A885-01	6.6238	686	0
TCGA-UCEC	TCGA-D1-A3DA-01	7.3223	483	0
TCGA-LUAD	TCGA-55-6979-01	6.3576	237	1
TCGA-KIRP	TCGA-P4-AAVO-01	6.0374	2400	0
TCGA-KIPAN	TCGA-P4-AAVO-01	6.0374	2400	0
TCGA-LUSC	TCGA-NC-A5HK-01	7.2966	128	0
TCGA-STAD	TCGA-VQ-A91Z-01	7.8774	1690	0
TCGA-STES	TCGA-VQ-A91Z-01	7.8774	1690	0
TCGA-SARC	TCGA-DX-A8BR-01	7.0046	4573	0
TCGA-CHOL	TCGA-W5-AA2X-01	7.0003	271	1
TCGA-THCA	TCGA-BJ-A291-01	6.2479	696	0
TCGA-CESC	TCGA-IR-A3LH-01	7.3164	2394	0
TCGA-KICH	TCGA-KO-8410-01	6.0518	3136	0
TCGA-KIPAN	TCGA-KO-8410-01	6.0518	3136	0
TCGA-BRCA	TCGA-BH-A0H0-01	7.4884	461	0
TCGA-ESCA	TCGA-LN-A4A9-01	7.2039	351	1
TCGA-STES	TCGA-LN-A4A9-01	7.2039	351	1
TCGA-BRCA	TCGA-LL-A5YO-01	6.914	440	0
TCGA-LUAD	TCGA-86-A4JF-01	7.5082	737	1
TCGA-READ	TCGA-DC-6156-01	7.4482	943	0
TCGA-COADREAD	TCGA-DC-6156-01	7.4482	943	0
TCGA-PRAD	TCGA-QU-A6IP-01	6.6445	2620	0
TCGA-UCEC	TCGA-FI-A3PV-01	7.1226	1249	1
TCGA-PRAD	TCGA-V1-A9O9-01	6.8938	2870	0
TCGA-SKCM-M	TCGA-FS-A1Z3-06	7.5365	636	1
TCGA-SKCM	TCGA-FS-A1Z3-06	7.5365	636	1
TCGA-STAD	TCGA-VQ-A8PH-01	8.0991	389	1
TCGA-STES	TCGA-VQ-A8PH-01	8.0991	389	1
TCGA-BRCA	TCGA-AC-A6IX-01	6.7267	373	0
TCGA-BLCA	TCGA-XF-A8HH-01	6.9433	57	1
TCGA-SKCM-P	TCGA-EB-A551-01	6.9205	590	0
TCGA-SKCM	TCGA-EB-A551-01	6.9205	590	0
TCGA-THCA	TCGA-EL-A4K2-01	6.9124	928	0
TCGA-LGG	TCGA-HW-7491-01	6.0273	2078	0
TCGA-GBMLGG	TCGA-HW-7491-01	6.0273	2078	0
TCGA-SKCM-M	TCGA-FS-A1ZD-06	7.4077	1628	1
TCGA-SKCM	TCGA-FS-A1ZD-06	7.4077	1628	1
TCGA-LUAD	TCGA-86-7701-01	6.7432	947	0
TCGA-PRAD	TCGA-EJ-A8FO-01	6.859	282	0
TCGA-LUAD	TCGA-62-8398-01	7.3855	444	1
TCGA-KIRC	TCGA-A3-3307-01	7.059	1436	0
TCGA-KIPAN	TCGA-A3-3307-01	7.059	1436	0
TCGA-KIRC	TCGA-A3-3320-01	7.1536	1508	0
TCGA-KIPAN	TCGA-A3-3320-01	7.1536	1508	0
TCGA-THCA	TCGA-EM-A3O7-01	6.8879	223	0
TCGA-SKCM-M	TCGA-D3-A8GP-06	7.3447	4646	0
TCGA-SKCM	TCGA-D3-A8GP-06	7.3447	4646	0
TCGA-LUAD	TCGA-L9-A443-01	6.3132	193	1
TCGA-KIRC	TCGA-CZ-5469-01	6.9021	946	1
TCGA-KIPAN	TCGA-CZ-5469-01	6.9021	946	1
TCGA-LGG	TCGA-S9-A6U1-01	6.44	785	0
TCGA-GBMLGG	TCGA-S9-A6U1-01	6.44	785	0
TCGA-BRCA	TCGA-A2-A04Y-01	6.9023	1099	0
TCGA-SKCM-M	TCGA-D3-A2JF-06	6.7568	1888	0
TCGA-SKCM	TCGA-D3-A2JF-06	6.7568	1888	0
TCGA-LUSC	TCGA-66-2767-01	6.615	61	0
TCGA-LIHC	TCGA-MR-A520-01	5.3183	229	0
TCGA-THYM	TCGA-X7-A8M4-01	7.3846	3808	0
TCGA-BLCA	TCGA-FD-A3B7-01	7.2742	122	1
TCGA-LGG	TCGA-E1-5307-01	6.2627	1762	1
TCGA-GBMLGG	TCGA-E1-5307-01	6.2627	1762	1
TCGA-LUAD	TCGA-78-8660-01	7.541	321	1
TCGA-LGG	TCGA-DU-A76L-01	6.7665	814	1
TCGA-GBMLGG	TCGA-DU-A76L-01	6.7665	814	1
TCGA-CESC	TCGA-C5-A1M9-01	7.6928	1065	1
TCGA-KICH	TCGA-KL-8325-01	6.5281	725	1
TCGA-KIPAN	TCGA-KL-8325-01	6.5281	725	1
TCGA-LGG	TCGA-HW-7495-01	5.7295	1078	0
TCGA-GBMLGG	TCGA-HW-7495-01	5.7295	1078	0
TCGA-BLCA	TCGA-K4-A3WU-01	6.8837	105	0
TCGA-READ	TCGA-AG-4021-01	7.5001	121	1
TCGA-COADREAD	TCGA-AG-4021-01	7.5001	121	1
TCGA-BRCA	TCGA-E2-A156-01	7.7169	726	0
TCGA-LGG	TCGA-CS-6669-01	3.6971	1494	0
TCGA-GBMLGG	TCGA-CS-6669-01	3.6971	1494	0
TCGA-THCA	TCGA-EL-A3GW-01	7.2519	1527	0
TCGA-THCA	TCGA-EM-A2CL-01	6.7049	401	0
TCGA-BLCA	TCGA-CF-A47V-01	7.4348	379	0
TCGA-BRCA	TCGA-AR-A24R-01	7.153	3430	0
TCGA-MESO	TCGA-3H-AB3O-01	6.6398	1302	1
TCGA-PRAD	TCGA-J4-A67L-01	6.2589	770	0
TCGA-LGG	TCGA-HT-7481-01	5.4182	2918	0
TCGA-GBMLGG	TCGA-HT-7481-01	5.4182	2918	0
TCGA-LAML	TCGA-AB-2894-03	6.6678	181	1
TCGA-LUSC	TCGA-NC-A5HO-01	7.0503	1336	0
TCGA-SARC	TCGA-QQ-A5VA-01	6.493	550	1
TCGA-UCEC	TCGA-AJ-A3BG-01	7.04	550	0
TCGA-SKCM-P	TCGA-BF-A1PZ-01	7.6455	853	0
TCGA-SKCM	TCGA-BF-A1PZ-01	7.6455	853	0
TCGA-LAML	TCGA-AB-2844-03	7.5889	122	1
TCGA-LAML	TCGA-AB-2828-03	7.084	2284	0
TCGA-PRAD	TCGA-XQ-A8TA-01	7.1134	146	1
TCGA-LUAD	TCGA-78-7148-01	7.0441	626	1
TCGA-LGG	TCGA-DU-8163-01	6.1985	629	0
TCGA-GBMLGG	TCGA-DU-8163-01	6.1985	629	0
TCGA-SKCM-M	TCGA-FS-A4FB-06	7.0727	813	1
TCGA-SKCM	TCGA-FS-A4FB-06	7.0727	813	1
TCGA-BRCA	TCGA-D8-A1JP-01	7.4325	639	0
TCGA-BRCA	TCGA-E2-A1IK-01	6.6863	1800	0
TCGA-OV	TCGA-24-0970-01	7.0462	354	1
TCGA-LUSC	TCGA-43-6773-01	6.2434	116	1
TCGA-OV	TCGA-24-1424-01	7.2891	183	0
TCGA-SKCM-M	TCGA-EB-A44Q-06	7.2503	422	0
TCGA-SKCM	TCGA-EB-A44Q-06	7.2503	422	0
TCGA-BRCA	TCGA-AN-A0FS-01	7.2611	210	0
TCGA-LUSC	TCGA-77-8154-01	7.6283	1841	0
TCGA-TGCT	TCGA-2G-AAFM-01	7.2212	503	0
TCGA-THCA	TCGA-DJ-A3V5-01	6.7746	584	0
TCGA-SKCM-M	TCGA-WE-A8ZX-06	7.5231	1089	0
TCGA-SKCM	TCGA-WE-A8ZX-06	7.5231	1089	0
TCGA-BRCA	TCGA-AC-A3TM-01	6.9054	762	0
TCGA-THCA	TCGA-DJ-A2Q3-01	6.5906	1224	0
TCGA-HNSC	TCGA-CV-7446-01	7.5202	1093	1
TCGA-DLBC	TCGA-G8-6909-01	6.3843	3553	1
TCGA-STAD	TCGA-VQ-A91N-01	8.239	570	1
TCGA-STES	TCGA-VQ-A91N-01	8.239	570	1
TCGA-BLCA	TCGA-DK-A3X1-01	6.7592	2009	0
TCGA-KIRP	TCGA-B9-A5W7-01	6.8708	585	0
TCGA-KIPAN	TCGA-B9-A5W7-01	6.8708	585	0
TCGA-BRCA	TCGA-AR-A2LE-01	6.6535	5062	0
TCGA-COAD	TCGA-AD-6964-01	7.3979	331	1
TCGA-COADREAD	TCGA-AD-6964-01	7.3979	331	1
TCGA-LUSC	TCGA-37-A5EL-01	6.9871	1143	1
TCGA-GBM	TCGA-26-1442-01	5.2525	953	0
TCGA-GBMLGG	TCGA-26-1442-01	5.2525	953	0
TCGA-KIRC	TCGA-B0-4688-01	7.1579	101	1
TCGA-KIPAN	TCGA-B0-4688-01	7.1579	101	1
TCGA-BRCA	TCGA-BH-A0HK-01	6.5338	178	0
TCGA-PRAD	TCGA-J4-A67O-01	5.6404	839	0
TCGA-COAD	TCGA-G4-6295-01	7.8818	254	0
TCGA-COADREAD	TCGA-G4-6295-01	7.8818	254	0
TCGA-STAD	TCGA-RD-A8NB-01	7.5407	513	1
TCGA-STES	TCGA-RD-A8NB-01	7.5407	513	1
TCGA-KIRC	TCGA-B2-4101-01	6.6113	648	0
TCGA-KIPAN	TCGA-B2-4101-01	6.6113	648	0
TCGA-KIRP	TCGA-BQ-7048-01	6.3685	2839	0
TCGA-KIPAN	TCGA-BQ-7048-01	6.3685	2839	0
TCGA-CESC	TCGA-DG-A2KJ-01	6.394	2893	0
TCGA-LUAD	TCGA-67-6215-01	7.0728	174	0
TCGA-LUAD	TCGA-55-A490-01	8.599	99	1
TCGA-BLCA	TCGA-4Z-AA81-01	7.4145	1270	1
TCGA-BLCA	TCGA-CF-A3MG-01	7.4025	369	0
TCGA-PCPG	TCGA-QR-A708-01	6.1414	35	0
TCGA-OV	TCGA-24-2023-01	7.1363	1364	1
TCGA-STAD	TCGA-BR-A4PE-01	7.586	621	0
TCGA-STES	TCGA-BR-A4PE-01	7.586	621	0
TCGA-COAD	TCGA-NH-A50T-01	7.2935	553	0
TCGA-COADREAD	TCGA-NH-A50T-01	7.2935	553	0
TCGA-THCA	TCGA-FE-A237-01	6.9363	3431	0
TCGA-TGCT	TCGA-2G-AAFI-01	8.014	675	0
TCGA-LIHC	TCGA-ZS-A9CE-01	6.3511	1241	0
TCGA-BRCA	TCGA-AR-A250-01	7.1431	2707	0
TCGA-PRAD	TCGA-HC-7230-01	7.2179	1001	0
TCGA-BLCA	TCGA-S5-AA26-01	7.0632	503	0
TCGA-LGG	TCGA-HT-8110-01	6.4077	419	0
TCGA-GBMLGG	TCGA-HT-8110-01	6.4077	419	0
TCGA-BRCA	TCGA-D8-A1JG-01	7.2404	1612	0
TCGA-KICH	TCGA-KL-8337-01	6.2449	1364	0
TCGA-KIPAN	TCGA-KL-8337-01	6.2449	1364	0
TCGA-BLCA	TCGA-ZF-A9R4-01	7.1975	921	0
TCGA-BLCA	TCGA-GC-A3OO-01	6.9713	481	0
TCGA-COAD	TCGA-D5-5539-01	7.1521	596	0
TCGA-COADREAD	TCGA-D5-5539-01	7.1521	596	0
TCGA-SKCM-P	TCGA-GN-A26C-01	6.8818	821	1
TCGA-SKCM	TCGA-GN-A26C-01	6.8818	821	1
TCGA-PRAD	TCGA-HC-A6AL-01	6.57	67	0
TCGA-LUAD	TCGA-69-7974-01	7.2362	184	0
TCGA-BRCA	TCGA-C8-A134-01	7.8153	383	0
TCGA-SKCM-M	TCGA-D3-A1Q7-06	7.591	4053	0
TCGA-SKCM	TCGA-D3-A1Q7-06	7.591	4053	0
TCGA-KIRC	TCGA-AK-3429-01	6.126	3328	0
TCGA-KIPAN	TCGA-AK-3429-01	6.126	3328	0
TCGA-SARC	TCGA-JV-A5VF-01	7.5785	32	1
TCGA-READ	TCGA-AH-6903-01	7.1096	592	0
TCGA-COADREAD	TCGA-AH-6903-01	7.1096	592	0
TCGA-KIRP	TCGA-5P-A9K8-01	6.4941	1309	0
TCGA-KIPAN	TCGA-5P-A9K8-01	6.4941	1309	0
TCGA-UCEC	TCGA-BS-A0V4-01	6.0697	1810	0
TCGA-ESCA	TCGA-Z6-A9VB-01	8.1845	40	0
TCGA-STES	TCGA-Z6-A9VB-01	8.1845	40	0
TCGA-CESC	TCGA-Q1-A5R3-01	6.5511	485	0
TCGA-BRCA	TCGA-AC-A62V-01	6.9154	348	1
TCGA-LIHC	TCGA-G3-AAV0-01	5.6103	476	0
TCGA-THCA	TCGA-ET-A39O-01	6.5177	3059	0
TCGA-PRAD	TCGA-G9-6369-01	6.3025	1215	0
TCGA-THCA	TCGA-FK-A3S3-01	6.8051	2162	0
TCGA-PAAD	TCGA-FB-AAQ1-01	6.9041	123	1
TCGA-KIRC	TCGA-AK-3455-01	6.3471	683	1
TCGA-KIPAN	TCGA-AK-3455-01	6.3471	683	1
TCGA-PRAD	TCGA-HC-7211-01	7.5057	1221	0
TCGA-KIRP	TCGA-2Z-A9J3-01	7.0688	1771	1
TCGA-KIPAN	TCGA-2Z-A9J3-01	7.0688	1771	1
TCGA-SKCM-M	TCGA-GF-A3OT-06	7.6061	301	0
TCGA-SKCM	TCGA-GF-A3OT-06	7.6061	301	0
TCGA-BRCA	TCGA-GM-A3XN-01	6.9566	2019	0
TCGA-LUAD	TCGA-49-AAR4-01	6.9237	879	1
TCGA-MESO	TCGA-UD-AAC7-01	7.293	406	1
TCGA-PRAD	TCGA-4L-AA1F-01	6.8449	350	0
TCGA-KIRC	TCGA-AK-3433-01	5.7975	3409	0
TCGA-KIPAN	TCGA-AK-3433-01	5.7975	3409	0
TCGA-LIHC	TCGA-DD-AAD8-01	6.3105	1219	0
TCGA-BRCA	TCGA-AO-A129-01	7.1257	3286	0
TCGA-HNSC	TCGA-P3-A6T3-01	7.432	577	1
TCGA-SKCM-M	TCGA-ER-A19G-06	7.296	9188	0
TCGA-SKCM	TCGA-ER-A19G-06	7.296	9188	0
TCGA-STAD	TCGA-R5-A7ZR-01	7.0113	185	1
TCGA-STES	TCGA-R5-A7ZR-01	7.0113	185	1
TCGA-HNSC	TCGA-CV-A468-01	7.0183	464	1
TCGA-PRAD	TCGA-EJ-5516-01	6.6681	1889	0
TCGA-SARC	TCGA-DX-A8BV-01	7.5624	1845	1
TCGA-UCEC	TCGA-EY-A2OO-01	7.6631	1392	0
TCGA-BLCA	TCGA-YF-AA3L-01	6.7158	364	0
TCGA-STAD	TCGA-BR-8059-01	7.5018	439	1
TCGA-STES	TCGA-BR-8059-01	7.5018	439	1
TCGA-THCA	TCGA-EL-A3MZ-01	6.5161	1597	1
TCGA-STAD	TCGA-CD-8527-01	7.0645	218	1
TCGA-STES	TCGA-CD-8527-01	7.0645	218	1
TCGA-LIHC	TCGA-DD-AACU-01	6.4431	1567	0
TCGA-BRCA	TCGA-BH-A1F8-01	7.0474	763	1
TCGA-LIHC	TCGA-G3-AAV3-01	6.3861	412	0
TCGA-HNSC	TCGA-QK-A6V9-01	7.9172	833	0
TCGA-KIRC	TCGA-A3-3306-01	6.2281	1120	0
TCGA-KIPAN	TCGA-A3-3306-01	6.2281	1120	0
TCGA-BLCA	TCGA-XF-A9SJ-01	6.5588	98	1
TCGA-BRCA	TCGA-D8-A1JK-01	7.2571	612	0
TCGA-SKCM-M	TCGA-WE-A8ZO-06	7.4193	2145	0
TCGA-SKCM	TCGA-WE-A8ZO-06	7.4193	2145	0
TCGA-BLCA	TCGA-ZF-A9R0-01	6.5997	680	1
TCGA-LGG	TCGA-RY-A840-01	5.7668	854	0
TCGA-GBMLGG	TCGA-RY-A840-01	5.7668	854	0
TCGA-BRCA	TCGA-A8-A08X-01	6.7611	1308	0
TCGA-BRCA	TCGA-AR-A2LN-01	7.3331	1161	0
TCGA-LAML	TCGA-AB-2949-03	7.3034	699	0
TCGA-READ	TCGA-EI-6882-01	7.9958	262	0
TCGA-COADREAD	TCGA-EI-6882-01	7.9958	262	0
TCGA-THCA	TCGA-MK-A4N6-01	6.7274	1098	0
TCGA-COAD	TCGA-AZ-4315-01	7.0955	1776	0
TCGA-COADREAD	TCGA-AZ-4315-01	7.0955	1776	0
TCGA-LIHC	TCGA-DD-AADO-01	5.5217	453	0
TCGA-STAD	TCGA-3M-AB46-01	7.0296	1765	0
TCGA-STES	TCGA-3M-AB46-01	7.0296	1765	0
TCGA-SARC	TCGA-DX-A48R-01	7.0604	805	0
TCGA-LGG	TCGA-VM-A8C9-01	5.3715	1314	0
TCGA-GBMLGG	TCGA-VM-A8C9-01	5.3715	1314	0
TCGA-SKCM-P	TCGA-EB-A85I-01	6.4733	362	0
TCGA-SKCM	TCGA-EB-A85I-01	6.4733	362	0
TCGA-SARC	TCGA-DX-A7ET-01	6.7965	463	0
TCGA-KIRC	TCGA-CJ-4869-01	6.688	2554	0
TCGA-KIPAN	TCGA-CJ-4869-01	6.688	2554	0
TCGA-COAD	TCGA-AA-3506-01	7.6297	1765	0
TCGA-COADREAD	TCGA-AA-3506-01	7.6297	1765	0
TCGA-PAAD	TCGA-3A-A9I9-01	6.3524	634	1
TCGA-KIRP	TCGA-A4-8098-01	6.2634	896	0
TCGA-KIPAN	TCGA-A4-8098-01	6.2634	896	0
TCGA-STAD	TCGA-BR-8286-01	7.7871	895	0
TCGA-STES	TCGA-BR-8286-01	7.7871	895	0
TCGA-PAAD	TCGA-F2-6879-01	6.9609	334	1
TCGA-STAD	TCGA-IN-A7NT-01	7.3231	323	0
TCGA-STES	TCGA-IN-A7NT-01	7.3231	323	0
TCGA-LIHC	TCGA-G3-A3CJ-01	5.4313	594	0
TCGA-PCPG	TCGA-SR-A6MU-01	6.1004	3362	0
TCGA-PRAD	TCGA-ZG-A9LM-01	6.615	378	0
TCGA-SKCM-P	TCGA-EB-A4OZ-01	6.626	620	0
TCGA-SKCM	TCGA-EB-A4OZ-01	6.626	620	0
TCGA-THCA	TCGA-J8-A3YD-01	6.8124	968	0
TCGA-LIHC	TCGA-DD-A73C-01	5.8562	701	0
TCGA-OV	TCGA-61-2111-01	7.3388	3825	0
TCGA-STAD	TCGA-R5-A7ZI-01	6.3418	2267	0
TCGA-STES	TCGA-R5-A7ZI-01	6.3418	2267	0
TCGA-UCEC	TCGA-AJ-A3NC-01	7.0145	1125	0
TCGA-THYM	TCGA-4V-A9QI-01	7.1795	2936	0
TCGA-BLCA	TCGA-BT-A42C-01	7.3857	873	0
TCGA-PCPG	TCGA-QR-A70K-01	6.8278	274	0
TCGA-LAML	TCGA-AB-2955-03	6.5803	489	1
TCGA-LIHC	TCGA-G3-A25X-01	5.8994	1779	0
TCGA-LUAD	TCGA-05-4418-01	6.2709	274	1
TCGA-KIRC	TCGA-BP-4983-01	7.5449	1413	0
TCGA-KIPAN	TCGA-BP-4983-01	7.5449	1413	0
TCGA-KIRC	TCGA-B4-5378-01	7.1736	175	0
TCGA-KIPAN	TCGA-B4-5378-01	7.1736	175	0
TCGA-CESC	TCGA-HG-A2PA-01	7.0379	773	1
TCGA-BRCA	TCGA-A8-A09A-01	7.0477	304	0
TCGA-KIRP	TCGA-BQ-7056-01	6.4024	612	0
TCGA-KIPAN	TCGA-BQ-7056-01	6.4024	612	0
TCGA-STAD	TCGA-BR-6801-01	6.9937	1223	0
TCGA-STES	TCGA-BR-6801-01	6.9937	1223	0
TCGA-KIRP	TCGA-F9-A4JJ-01	7.2575	325	1
TCGA-KIPAN	TCGA-F9-A4JJ-01	7.2575	325	1
TCGA-HNSC	TCGA-CV-A6K2-01	7.1265	317	1
TCGA-KIRP	TCGA-5P-A9JZ-01	6.6684	2744	0
TCGA-KIPAN	TCGA-5P-A9JZ-01	6.6684	2744	0
TCGA-HNSC	TCGA-HD-A6I0-01	6.4728	210	0
TCGA-UVM	TCGA-WC-A87W-01	7.0257	1703	0
TCGA-DLBC	TCGA-FA-A82F-01	7.4066	427	0
TCGA-THCA	TCGA-EM-A3AR-01	6.9431	1133	0
TCGA-LGG	TCGA-HW-8319-01	6.1438	1209	1
TCGA-GBMLGG	TCGA-HW-8319-01	6.1438	1209	1
TCGA-BRCA	TCGA-E2-A1IJ-01	6.8898	865	0
TCGA-SARC	TCGA-HB-A3L4-01	7.4604	1061	1
TCGA-PAAD	TCGA-3A-A9IB-01	6.9997	224	1
TCGA-KIRP	TCGA-G7-6792-01	7.2432	2765	0
TCGA-KIPAN	TCGA-G7-6792-01	7.2432	2765	0
TCGA-OV	TCGA-31-1946-01	7.7123	918	0
TCGA-PAAD	TCGA-IB-AAUV-01	6.705	404	0
TCGA-LIHC	TCGA-BD-A2L6-01	6.0108	1363	0
TCGA-KIRC	TCGA-B2-5639-01	6.8642	1003	1
TCGA-KIPAN	TCGA-B2-5639-01	6.8642	1003	1
TCGA-KIRC	TCGA-GK-A6C7-01	7.4408	61	0
TCGA-KIPAN	TCGA-GK-A6C7-01	7.4408	61	0
TCGA-SKCM-M	TCGA-EE-A2MS-06	7.2336	4942	0
TCGA-SKCM	TCGA-EE-A2MS-06	7.2336	4942	0
TCGA-THCA	TCGA-EL-A4K7-01	6.7552	1251	0
TCGA-PRAD	TCGA-ZG-A9LY-01	6.7306	370	0
TCGA-UCEC	TCGA-B5-A1MW-01	8.0391	447	0
TCGA-THCA	TCGA-DJ-A2PQ-01	6.79	1077	0
TCGA-ACC	TCGA-OR-A5KO-01	7.5598	1414	0
TCGA-BRCA	TCGA-A8-A08O-01	7.3996	943	0
TCGA-OV	TCGA-13-0720-01	6.5195	1355	1
TCGA-THCA	TCGA-EM-A22M-01	6.3285	442	0
TCGA-THCA	TCGA-EM-A3FO-01	7.0185	532	0
TCGA-UVM	TCGA-V4-A9ES-01	6.5902	1511	0
TCGA-PRAD	TCGA-J4-A67K-01	5.9418	1004	0
TCGA-KIRC	TCGA-A3-3359-01	6.3918	2504	0
TCGA-KIPAN	TCGA-A3-3359-01	6.3918	2504	0
TCGA-LGG	TCGA-HT-7482-01	5.8843	3253	0
TCGA-GBMLGG	TCGA-HT-7482-01	5.8843	3253	0
TCGA-HNSC	TCGA-CV-6962-01	7.4386	126	1
TCGA-CESC	TCGA-EA-A50E-01	7.1223	227	1
TCGA-LUSC	TCGA-21-1082-01	7.3599	3644	0
TCGA-LUAD	TCGA-35-4123-01	5.931	182	0
TCGA-BRCA	TCGA-A2-A4RY-01	7.2756	648	0
TCGA-LGG	TCGA-QH-A6CW-01	6.5024	414	0
TCGA-GBMLGG	TCGA-QH-A6CW-01	6.5024	414	0
TCGA-HNSC	TCGA-UF-A7JT-01	7.3396	993	1
[truncated: 10,107 more rows]

## Sheet: DE
	Group	Expression	SampleName
GBM(T=153,N=1157)	Tumor	6.6405	TCGA-19-1787-01
GBM(T=153,N=1157)	Tumor	6.1451	TCGA-06-5412-01
GBM(T=153,N=1157)	Tumor	6.5157	TCGA-16-0846-01
GBM(T=153,N=1157)	Tumor	6.4022	TCGA-12-5299-01
GBM(T=153,N=1157)	Tumor	6.2854	TCGA-06-2561-01
GBM(T=153,N=1157)	Tumor	5.1571	TCGA-06-0132-01
GBM(T=153,N=1157)	Tumor	6.4889	TCGA-26-5136-01
GBM(T=153,N=1157)	Tumor	6.8394	TCGA-27-2521-01
GBM(T=153,N=1157)	Tumor	7.2713	TCGA-19-2629-01
GBM(T=153,N=1157)	Tumor	5.8392	TCGA-06-0238-01
GBM(T=153,N=1157)	Tumor	5.6899	TCGA-06-0749-01
GBM(T=153,N=1157)	Tumor	7.0276	TCGA-06-0174-01
GBM(T=153,N=1157)	Tumor	7.2145	TCGA-06-5414-01
GBM(T=153,N=1157)	Tumor	6.6758	TCGA-28-5207-01
GBM(T=153,N=1157)	Tumor	5.8435	TCGA-06-5410-01
GBM(T=153,N=1157)	Tumor	7.4228	TCGA-06-0747-01
GBM(T=153,N=1157)	Tumor	6.6085	TCGA-28-2513-01
GBM(T=153,N=1157)	Tumor	7.2081	TCGA-76-4927-01
GBM(T=153,N=1157)	Tumor	6.687	TCGA-06-0645-01
GBM(T=153,N=1157)	Tumor	7.3609	TCGA-06-2565-01
GBM(T=153,N=1157)	Tumor	6.5513	TCGA-06-0130-01
GBM(T=153,N=1157)	Tumor	6.1235	TCGA-06-0750-01
GBM(T=153,N=1157)	Tumor	5.3448	TCGA-27-1831-01
GBM(T=153,N=1157)	Tumor	6.5	TCGA-06-5416-01
GBM(T=153,N=1157)	Tumor	5.477	TCGA-06-0141-01
GBM(T=153,N=1157)	Tumor	7.4722	TCGA-06-0125-01
GBM(T=153,N=1157)	Tumor	7.1687	TCGA-76-4925-01
GBM(T=153,N=1157)	Tumor	6.8623	TCGA-76-4932-01
GBM(T=153,N=1157)	Tumor	5.8708	TCGA-28-2510-01
GBM(T=153,N=1157)	Tumor	6.6162	TCGA-06-0743-01
GBM(T=153,N=1157)	Tumor	7.358	TCGA-14-1034-01
GBM(T=153,N=1157)	Tumor	6.4588	TCGA-06-0184-01
GBM(T=153,N=1157)	Tumor	5.93	TCGA-12-3652-01
GBM(T=153,N=1157)	Tumor	7.1792	TCGA-26-5132-01
GBM(T=153,N=1157)	Tumor	7.2897	TCGA-32-1970-01
GBM(T=153,N=1157)	Tumor	4.9444	TCGA-06-0219-01
GBM(T=153,N=1157)	Tumor	6.917	TCGA-14-0787-01
GBM(T=153,N=1157)	Tumor	7.1828	TCGA-06-0190-01
GBM(T=153,N=1157)	Tumor	6.8441	TCGA-26-5135-01
GBM(T=153,N=1157)	Tumor	7.0518	TCGA-76-4931-01
GBM(T=153,N=1157)	Tumor	6.2963	TCGA-41-3915-01
GBM(T=153,N=1157)	Tumor	6.1252	TCGA-06-0649-01
GBM(T=153,N=1157)	Tumor	6.7857	TCGA-12-0618-01
GBM(T=153,N=1157)	Tumor	6.5284	TCGA-27-2524-01
GBM(T=153,N=1157)	Tumor	7.2596	TCGA-28-1753-01
GBM(T=153,N=1157)	Tumor	6.1138	TCGA-12-5295-01
GBM(T=153,N=1157)	Tumor	7.5218	TCGA-27-2523-01
GBM(T=153,N=1157)	Tumor	7.0782	TCGA-06-2569-01
GBM(T=153,N=1157)	Tumor	6.7478	TCGA-27-1830-01
GBM(T=153,N=1157)	Tumor	6.9414	TCGA-06-2559-01
GBM(T=153,N=1157)	Tumor	5.5861	TCGA-27-2526-01
GBM(T=153,N=1157)	Tumor	6.7962	TCGA-06-5856-01
GBM(T=153,N=1157)	Tumor	5.2525	TCGA-26-1442-01
GBM(T=153,N=1157)	Tumor	6.3169	TCGA-06-5418-01
GBM(T=153,N=1157)	Tumor	7.1296	TCGA-26-5139-01
GBM(T=153,N=1157)	Tumor	5.7206	TCGA-06-5417-01
GBM(T=153,N=1157)	Tumor	4.5298	TCGA-26-5134-01
GBM(T=153,N=1157)	Tumor	6.4204	TCGA-06-5413-01
GBM(T=153,N=1157)	Tumor	6.1436	TCGA-76-4929-01
GBM(T=153,N=1157)	Tumor	7.05	TCGA-06-0646-01
GBM(T=153,N=1157)	Tumor	6.9218	TCGA-12-3650-01
GBM(T=153,N=1157)	Tumor	6.3248	TCGA-19-2620-01
GBM(T=153,N=1157)	Tumor	5.3355	TCGA-28-5213-01
GBM(T=153,N=1157)	Tumor	5.5533	TCGA-06-0138-01
GBM(T=153,N=1157)	Tumor	6.5935	TCGA-06-5415-01
GBM(T=153,N=1157)	Tumor	5.4208	TCGA-06-0139-01
GBM(T=153,N=1157)	Tumor	6.7518	TCGA-02-0047-01
GBM(T=153,N=1157)	Tumor	6.9533	TCGA-14-0789-01
GBM(T=153,N=1157)	Tumor	6.3282	TCGA-12-0616-01
GBM(T=153,N=1157)	Tumor	6.6159	TCGA-32-1982-01
GBM(T=153,N=1157)	Tumor	6.3379	TCGA-28-5220-01
GBM(T=153,N=1157)	Tumor	6.1156	TCGA-14-0817-01
GBM(T=153,N=1157)	Tumor	5.6735	TCGA-12-1597-01
GBM(T=153,N=1157)	Tumor	6.9628	TCGA-06-2570-01
GBM(T=153,N=1157)	Tumor	7.4075	TCGA-06-0211-01
GBM(T=153,N=1157)	Tumor	6.859	TCGA-02-2483-01
GBM(T=153,N=1157)	Tumor	6.5207	TCGA-06-0156-01
GBM(T=153,N=1157)	Tumor	6.7561	TCGA-27-1837-01
GBM(T=153,N=1157)	Tumor	6.797	TCGA-28-5204-01
GBM(T=153,N=1157)	Tumor	6.2852	TCGA-32-5222-01
GBM(T=153,N=1157)	Tumor	7.7089	TCGA-28-5209-01
GBM(T=153,N=1157)	Tumor	6.3924	TCGA-27-2519-01
GBM(T=153,N=1157)	Tumor	7.1291	TCGA-14-0790-01
GBM(T=153,N=1157)	Tumor	7.0049	TCGA-12-0821-01
GBM(T=153,N=1157)	Tumor	6.9833	TCGA-19-2619-01
GBM(T=153,N=1157)	Tumor	6.5526	TCGA-27-1835-01
GBM(T=153,N=1157)	Tumor	7.0612	TCGA-12-0619-01
GBM(T=153,N=1157)	Tumor	6.4605	TCGA-06-0168-01
GBM(T=153,N=1157)	Tumor	6.7966	TCGA-27-2528-01
GBM(T=153,N=1157)	Tumor	7.3279	TCGA-28-5215-01
GBM(T=153,N=1157)	Tumor	7.1393	TCGA-28-5218-01
GBM(T=153,N=1157)	Tumor	6.6068	TCGA-14-1825-01
GBM(T=153,N=1157)	Tumor	7.4796	TCGA-06-0129-01
GBM(T=153,N=1157)	Tumor	6.5037	TCGA-06-5859-01
GBM(T=153,N=1157)	Tumor	6.545	TCGA-28-1747-01
GBM(T=153,N=1157)	Tumor	6.0033	TCGA-28-2499-01
GBM(T=153,N=1157)	Tumor	5.774	TCGA-32-1980-01
GBM(T=153,N=1157)	Tumor	6.9122	TCGA-06-2564-01
GBM(T=153,N=1157)	Tumor	7.0389	TCGA-06-5408-01
GBM(T=153,N=1157)	Tumor	6.8231	TCGA-27-1832-01
GBM(T=153,N=1157)	Tumor	4.6153	TCGA-14-1829-01
GBM(T=153,N=1157)	Tumor	6.5934	TCGA-32-2615-01
GBM(T=153,N=1157)	Tumor	7.121	TCGA-06-0158-01
GBM(T=153,N=1157)	Tumor	6.5227	TCGA-28-5216-01
GBM(T=153,N=1157)	Tumor	6.7623	TCGA-41-2572-01
GBM(T=153,N=1157)	Tumor	6.0485	TCGA-02-0055-01
GBM(T=153,N=1157)	Tumor	7.3033	TCGA-32-2634-01
GBM(T=153,N=1157)	Tumor	5.4087	TCGA-06-5411-01
GBM(T=153,N=1157)	Tumor	6.7518	TCGA-06-0744-01
GBM(T=153,N=1157)	Tumor	6.6026	TCGA-76-4928-01
GBM(T=153,N=1157)	Tumor	6.9311	TCGA-06-0644-01
GBM(T=153,N=1157)	Tumor	6.4846	TCGA-14-0871-01
GBM(T=153,N=1157)	Tumor	7.4746	TCGA-08-0386-01
GBM(T=153,N=1157)	Tumor	7.1139	TCGA-32-2632-01
GBM(T=153,N=1157)	Tumor	6.2648	TCGA-06-0882-01
GBM(T=153,N=1157)	Tumor	6.3857	TCGA-41-4097-01
GBM(T=153,N=1157)	Tumor	6.7698	TCGA-16-1045-01
GBM(T=153,N=1157)	Tumor	6.6505	TCGA-19-2625-01
GBM(T=153,N=1157)	Tumor	6.4288	TCGA-27-1834-01
GBM(T=153,N=1157)	Tumor	5.5919	TCGA-41-2571-01
GBM(T=153,N=1157)	Tumor	6.1069	TCGA-19-4065-01
GBM(T=153,N=1157)	Tumor	6.2198	TCGA-14-0781-01
GBM(T=153,N=1157)	Tumor	7.1956	TCGA-06-0157-01
GBM(T=153,N=1157)	Tumor	7.3046	TCGA-12-3653-01
GBM(T=153,N=1157)	Tumor	6.4877	TCGA-76-4926-01
GBM(T=153,N=1157)	Tumor	7.0441	TCGA-26-5133-01
GBM(T=153,N=1157)	Tumor	6.6795	TCGA-06-2562-01
GBM(T=153,N=1157)	Tumor	7.5125	TCGA-41-5651-01
GBM(T=153,N=1157)	Tumor	6.3226	TCGA-06-0210-01
GBM(T=153,N=1157)	Tumor	7.0385	TCGA-19-2624-01
GBM(T=153,N=1157)	Tumor	7.4592	TCGA-19-5960-01
GBM(T=153,N=1157)	Tumor	6.7535	TCGA-06-0686-01
GBM(T=153,N=1157)	Tumor	7.189	TCGA-06-2563-01
GBM(T=153,N=1157)	Tumor	6.3595	TCGA-15-1444-01
GBM(T=153,N=1157)	Tumor	4.6124	TCGA-32-4213-01
GBM(T=153,N=1157)	Tumor	6.8668	TCGA-15-0742-01
GBM(T=153,N=1157)	Tumor	6.7666	TCGA-06-0187-01
GBM(T=153,N=1157)	Tumor	7.7347	TCGA-19-1390-01
GBM(T=153,N=1157)	Tumor	6.8455	TCGA-06-2557-01
GBM(T=153,N=1157)	Tumor	7.0598	TCGA-06-0878-01
GBM(T=153,N=1157)	Tumor	6.9751	TCGA-06-2567-01
GBM(T=153,N=1157)	Tumor	7.0947	TCGA-32-2616-01
GBM(T=153,N=1157)	Tumor	7.0934	TCGA-28-5208-01
GBM(T=153,N=1157)	Tumor	7.0933	TCGA-28-2514-01
GBM(T=153,N=1157)	Tumor	7.0192	TCGA-06-1804-01
GBM(T=153,N=1157)	Tumor	6.0944	TCGA-14-2554-01
GBM(T=153,N=1157)	Tumor	7.4675	TCGA-02-2485-01
GBM(T=153,N=1157)	Tumor	6.9688	TCGA-06-5858-01
GBM(T=153,N=1157)	Tumor	5.0009	TCGA-06-0178-01
GBM(T=153,N=1157)	Tumor	5.3191	TCGA-14-1823-01
GBM(T=153,N=1157)	Tumor	6.9064	TCGA-28-2509-01
GBM(T=153,N=1157)	Tumor	6.3908	TCGA-06-2558-01
GBM(T=153,N=1157)	Tumor	6.4514	TCGA-06-0745-01
GBM(T=153,N=1157)	Normal	4.6622	GTEX-13QIC-0011-R1a-SM-5O9CJ
GBM(T=153,N=1157)	Normal	5.3355	GTEX-N7MS-2526-SM-26GMA
GBM(T=153,N=1157)	Normal	3.278	GTEX-N7MS-2526-SM-26GMR
GBM(T=153,N=1157)	Normal	4.3653	GTEX-NPJ7-0011-R6a-SM-2I3G7
GBM(T=153,N=1157)	Normal	4.6124	GTEX-132Q8-3026-SM-5PNVG
GBM(T=153,N=1157)	Normal	4.6484	GTEX-NPJ7-2726-SM-2I3FT
GBM(T=153,N=1157)	Normal	4.8851	GTEX-13OVJ-0011-R9b-SM-5L3GD
GBM(T=153,N=1157)	Normal	4.7054	GTEX-XLM4-0011-R10A-SM-4AT5P
GBM(T=153,N=1157)	Normal	3.5595	GTEX-12ZZZ-0011-R10a-SM-5P9HC
GBM(T=153,N=1157)	Normal	3.4725	GTEX-X4XY-0011-R8A-SM-46MVC
GBM(T=153,N=1157)	Normal	4.0575	GTEX-13QJC-0011-R6a-SM-5S2VI
GBM(T=153,N=1157)	Normal	3.9155	GTEX-ZUA1-0011-R8b-SM-51MST
GBM(T=153,N=1157)	Normal	3.0479	GTEX-13FHP-0011-R7b-SM-5LZYI
GBM(T=153,N=1157)	Normal	6.0323	GTEX-11EMC-3326-SM-5P9JH
GBM(T=153,N=1157)	Normal	4.3067	GTEX-13112-0011-R7b-SM-5DUVW
GBM(T=153,N=1157)	Normal	4.1301	GTEX-12WSA-0011-R5b-SM-5GU5I
GBM(T=153,N=1157)	Normal	4.3917	GTEX-ZF28-3026-SM-4WKHP
GBM(T=153,N=1157)	Normal	3.9736	GTEX-ZUA1-0011-R7b-SM-4YCDP
GBM(T=153,N=1157)	Normal	3.5789	GTEX-11ZVC-0011-R9a-SM-57WC5
GBM(T=153,N=1157)	Normal	3.9891	GTEX-WZTO-0011-R4A-SM-3NMC7
GBM(T=153,N=1157)	Normal	5.8807	GTEX-NPJ7-0011-R11A-SM-2I3E8
GBM(T=153,N=1157)	Normal	4.2195	GTEX-13OVL-0011-R6a-SM-5L3G4
GBM(T=153,N=1157)	Normal	3.5059	GTEX-13NYB-0011-R1b-SM-5KM4F
GBM(T=153,N=1157)	Normal	4.9996	GTEX-WHSE-0011-R8A-SM-3P5Z1
GBM(T=153,N=1157)	Normal	4.1268	GTEX-T6MN-0011-R4A-SM-32QPG
GBM(T=153,N=1157)	Normal	3.855	GTEX-ZDXO-0011-R1a-SM-4WKF4
GBM(T=153,N=1157)	Normal	4.4229	GTEX-11DXY-3226-SM-5GIDE
GBM(T=153,N=1157)	Normal	3.4893	GTEX-ZV68-0011-R5a-SM-4YCDW
GBM(T=153,N=1157)	Normal	4.1194	GTEX-11GSP-0011-R6b-SM-57WBQ
GBM(T=153,N=1157)	Normal	4.1763	GTEX-13OVL-0011-R3b-SM-5L3I8
GBM(T=153,N=1157)	Normal	3.9625	GTEX-13OW7-0011-R5b-SM-5O9DM
GBM(T=153,N=1157)	Normal	6.2024	GTEX-11WQK-3126-SM-5EGI2
GBM(T=153,N=1157)	Normal	5.4985	GTEX-ZE9C-0011-R11a-SM-4WKGG
GBM(T=153,N=1157)	Normal	5.7584	GTEX-ZZPT-2926-SM-5EQ5S
GBM(T=153,N=1157)	Normal	4.8856	GTEX-12ZZY-3026-SM-5GCOU
GBM(T=153,N=1157)	Normal	6.5169	GTEX-WHSE-2926-SM-3NMBG
GBM(T=153,N=1157)	Normal	4.4854	GTEX-12ZZW-2926-SM-5LZUP
GBM(T=153,N=1157)	Normal	4.9649	GTEX-12WSD-0011-R9a-SM-5GU6W
GBM(T=153,N=1157)	Normal	5.5298	GTEX-YFC4-0011-R11a-SM-4SOK6
GBM(T=153,N=1157)	Normal	4.1779	GTEX-X261-0011-R5A-SM-3NMB4
GBM(T=153,N=1157)	Normal	6.4001	GTEX-11OC5-0626-SM-5HL6M
GBM(T=153,N=1157)	Normal	4.2608	GTEX-ZVZQ-0011-R7b-SM-57WBB
GBM(T=153,N=1157)	Normal	4.6229	GTEX-12ZZX-0011-R8a-SM-5DUW8
GBM(T=153,N=1157)	Normal	4.0583	GTEX-13PDP-0011-R1a-SM-5PNX5
GBM(T=153,N=1157)	Normal	4.7861	GTEX-11TTK-2926-SM-5PNYP
GBM(T=153,N=1157)	Normal	3.9193	GTEX-N7MS-0011-R3a-SM-5SI8H
GBM(T=153,N=1157)	Normal	4.5982	GTEX-T6MN-2626-SM-32PMQ
GBM(T=153,N=1157)	Normal	4.4822	GTEX-12WS9-0011-R5b-SM-5P9EV
GBM(T=153,N=1157)	Normal	4.607	GTEX-NL4W-0011-R9a-SM-2I3G1
GBM(T=153,N=1157)	Normal	3.8846	GTEX-13X6J-3026-SM-5Q5CU
GBM(T=153,N=1157)	Normal	4.0678	GTEX-145LS-0011-R10a-SM-5PNUQ
GBM(T=153,N=1157)	Normal	4.3998	GTEX-13OVL-0011-R10a-SM-5L3GS
GBM(T=153,N=1157)	Normal	4.2102	GTEX-14BIL-0011-R10a-SM-5SI75
GBM(T=153,N=1157)	Normal	4.8738	GTEX-13FLV-0011-R10b-SM-5LZZ2
GBM(T=153,N=1157)	Normal	4.3985	GTEX-13FLW-0011-R6b-SM-5L3EN
GBM(T=153,N=1157)	Normal	4.3312	GTEX-NL4W-0011-R10A-SM-2I3DY
GBM(T=153,N=1157)	Normal	4.0161	GTEX-S7SE-0011-R7A-SM-2XCDI
GBM(T=153,N=1157)	Normal	4.6662	GTEX-139UC-0011-R7a-SM-5IJCV
GBM(T=153,N=1157)	Normal	4.0566	GTEX-RNOR-0011-R4A-SM-3GAD3
GBM(T=153,N=1157)	Normal	6.5328	GTEX-13FHO-2926-SM-5L3ES
GBM(T=153,N=1157)	Normal	2.8217	GTEX-ZE7O-0011-R1a-SM-57WDM
GBM(T=153,N=1157)	Normal	5.9604	GTEX-11ZUS-2826-SM-5EQKW
GBM(T=153,N=1157)	Normal	5.9277	GTEX-WVLH-0011-R11A-SM-3MJFO
GBM(T=153,N=1157)	Normal	3.9635	GTEX-13IVO-0011-R5a-SM-5L3CY
GBM(T=153,N=1157)	Normal	3.7866	GTEX-11WQC-0011-R5a-SM-5BC74
GBM(T=153,N=1157)	Normal	4.4515	GTEX-R55F-1326-SM-5S2V4
GBM(T=153,N=1157)	Normal	0	GTEX-T6MN-0011-R7A-SM-5CHSP
GBM(T=153,N=1157)	Normal	3.4222	GTEX-RNOR-0011-R3A-SM-5SI8E
GBM(T=153,N=1157)	Normal	4.2479	GTEX-13QIC-0011-R10a-SM-5O9C7
GBM(T=153,N=1157)	Normal	3.9146	GTEX-13QJC-0011-R7b-SM-5PNUM
GBM(T=153,N=1157)	Normal	4.7148	GTEX-12WSD-3126-SM-5HL7P
GBM(T=153,N=1157)	Normal	3.5644	GTEX-13OVL-0011-R4b-SM-5L3HV
GBM(T=153,N=1157)	Normal	4.5361	GTEX-13X6I-0011-R2b-SM-5PNWQ
GBM(T=153,N=1157)	Normal	3.9449	GTEX-1313W-0011-R8a-SM-5DUVM
GBM(T=153,N=1157)	Normal	3.9079	GTEX-12ZZX-0011-R2a-SM-5EGLG
GBM(T=153,N=1157)	Normal	5.8096	GTEX-X261-0011-R11A-SM-4E3JY
GBM(T=153,N=1157)	Normal	3.9001	GTEX-13X6J-0011-R8b-SM-5PNUA
GBM(T=153,N=1157)	Normal	4.6502	GTEX-ZF28-0011-R11a-SM-4WWEI
GBM(T=153,N=1157)	Normal	5.7274	GTEX-ZF28-2926-SM-4WKG1
GBM(T=153,N=1157)	Normal	5.2861	GTEX-13OVJ-0011-R3b-SM-5P9H6
GBM(T=153,N=1157)	Normal	5.4459	GTEX-XOTO-0011-R11B-SM-4B64O
GBM(T=153,N=1157)	Normal	4.3653	GTEX-ZVZQ-0011-R9a-SM-51MRH
GBM(T=153,N=1157)	Normal	3.6938	GTEX-X261-0011-R7A-SM-4E3JJ
GBM(T=153,N=1157)	Normal	5.7263	GTEX-ZYY3-3026-SM-5GIEJ
GBM(T=153,N=1157)	Normal	3.7322	GTEX-12WSM-0011-R1a-SM-5LZW6
GBM(T=153,N=1157)	Normal	3.848	GTEX-13IVO-0011-R3b-SM-5IJBJ
GBM(T=153,N=1157)	Normal	4.3757	GTEX-13CZV-0011-R10b-SM-5LZYD
GBM(T=153,N=1157)	Normal	2.3978	GTEX-145MI-0011-R7b-SM-5Q5AZ
GBM(T=153,N=1157)	Normal	3.585	GTEX-13OW7-0011-R3a-SM-5O9DA
GBM(T=153,N=1157)	Normal	4.7761	GTEX-QVJO-0011-R7A-SM-2S1QO
GBM(T=153,N=1157)	Normal	3.6288	GTEX-RNOR-0011-R1A-SM-5SI8F
GBM(T=153,N=1157)	Normal	5.675	GTEX-13JVG-0011-R11a-SM-5KM53
GBM(T=153,N=1157)	Normal	3.4489	GTEX-11WQC-0011-R6a-SM-5BC77
GBM(T=153,N=1157)	Normal	4.8615	GTEX-13JUV-0011-R9a-SM-5LZX3
GBM(T=153,N=1157)	Normal	3.9402	GTEX-WL46-0011-R7A-SM-3LK7X
GBM(T=153,N=1157)	Normal	3.8856	GTEX-13FTZ-0011-R10b-SM-5KLZS
GBM(T=153,N=1157)	Normal	3.9874	GTEX-145MH-0011-R10b-SM-5PNUK
GBM(T=153,N=1157)	Normal	3.8846	GTEX-12WSF-0011-R6b-SM-5HL8W
GBM(T=153,N=1157)	Normal	4.1675	GTEX-13FXS-0011-R2b-SM-5K7XX
GBM(T=153,N=1157)	Normal	3.9117	GTEX-RNOR-0011-R5A-SM-2TF4J
GBM(T=153,N=1157)	Normal	3.9681	GTEX-TSE9-0011-R9A-SM-3DB7Q
GBM(T=153,N=1157)	Normal	3.943	GTEX-RVPU-0011-R11A-SM-2XCAF
GBM(T=153,N=1157)	Normal	6.3671	GTEX-X4EP-0011-R6A-SM-3P629
GBM(T=153,N=1157)	Normal	3.9326	GTEX-Y8DK-0011-R3A-SM-4RTW5
GBM(T=153,N=1157)	Normal	5.0466	GTEX-13IVO-2926-SM-5L3CZ
GBM(T=153,N=1157)	Normal	5.3607	GTEX-ZVT3-0011-R11b-SM-57WBI
GBM(T=153,N=1157)	Normal	5.9336	GTEX-13OVL-3026-SM-5IJF1
GBM(T=153,N=1157)	Normal	3.841	GTEX-1445S-0011-R5a-SM-5PNUS
GBM(T=153,N=1157)	Normal	5.1068	GTEX-13OVJ-0011-R7a-SM-5L3G1
GBM(T=153,N=1157)	Normal	5.641	GTEX-13OVH-0011-R11b-SM-5KM4X
GBM(T=153,N=1157)	Normal	4.0241	GTEX-11WQC-0011-R10a-SM-57WCT
GBM(T=153,N=1157)	Normal	3.5447	GTEX-11NV4-2126-SM-5N9DS
GBM(T=153,N=1157)	Normal	4.1875	GTEX-13X6I-0011-R3b-SM-5P9HM
GBM(T=153,N=1157)	Normal	6.2532	GTEX-Y111-2826-SM-4TT3O
GBM(T=153,N=1157)	Normal	3.9882	GTEX-13O3O-0011-R3b-SM-5KM3R
GBM(T=153,N=1157)	Normal	4.8904	GTEX-ZE9C-0011-R9a-SM-4WWCY
GBM(T=153,N=1157)	Normal	5.7145	GTEX-13X6K-0011-R11a-SM-5P9F5
GBM(T=153,N=1157)	Normal	4.1424	GTEX-12ZZX-0011-R10b-SM-5DUWK
GBM(T=153,N=1157)	Normal	4.3603	GTEX-12WSA-0011-R8a-SM-5P9EX
GBM(T=153,N=1157)	Normal	5.2246	TCGA-06-AABW-11
GBM(T=153,N=1157)	Normal	4.8841	GTEX-X4XX-0011-R1B-SM-3P622
GBM(T=153,N=1157)	Normal	4.0557	GTEX-13JVG-0011-R3b-SM-5LZXF
GBM(T=153,N=1157)	Normal	4.582	GTEX-ZAB4-0011-R6a-SM-4SOKD
GBM(T=153,N=1157)	Normal	4.717	GTEX-N7MT-0011-R2a-SM-2I3GI
GBM(T=153,N=1157)	Normal	6.2786	GTEX-13OW6-2926-SM-5KM29
GBM(T=153,N=1157)	Normal	4.0391	GTEX-12ZZW-0011-R5a-SM-5DUVN
GBM(T=153,N=1157)	Normal	4.1186	GTEX-S7SE-0011-R4A-SM-2XCDB
GBM(T=153,N=1157)	Normal	3.1408	GTEX-ZXG5-0011-R10a-SM-57WDD
GBM(T=153,N=1157)	Normal	4.3868	GTEX-13FLV-0011-R6a-SM-5KLZ4
GBM(T=153,N=1157)	Normal	4.2965	GTEX-ZAB4-0011-R7a-SM-4SOKE
GBM(T=153,N=1157)	Normal	4.1723	GTEX-OHPN-0011-R10A-SM-33HBU
GBM(T=153,N=1157)	Normal	4.7415	GTEX-13RTJ-0011-R7b-SM-5P9JS
GBM(T=153,N=1157)	Normal	5.7879	GTEX-12WSC-2926-SM-5BC5Z
GBM(T=153,N=1157)	Normal	4.98	GTEX-13OVJ-0011-R10b-SM-5L3HT
GBM(T=153,N=1157)	Normal	3.8827	GTEX-12ZZX-0011-R5a-SM-5HL89
GBM(T=153,N=1157)	Normal	4.3377	GTEX-145LS-0011-R7a-SM-5PNWM
GBM(T=153,N=1157)	Normal	6.1755	GTEX-N7MT-1226-SM-2TC6K
GBM(T=153,N=1157)	Normal	3.5741	GTEX-X261-0011-R6B-SM-4E3J8
GBM(T=153,N=1157)	Normal	4.4483	GTEX-13X6K-0011-R4b-SM-5P9HO
GBM(T=153,N=1157)	Normal	4.3971	GTEX-1445S-0011-R8a-SM-5PNWX
GBM(T=153,N=1157)	Normal	5.9788	GTEX-1128S-2826-SM-5N9DI
GBM(T=153,N=1157)	Normal	4.8773	GTEX-WWYW-0011-R6A-SM-3NB3G
GBM(T=153,N=1157)	Normal	3.2234	GTEX-147GR-0011-R4a-SM-5S2V2
GBM(T=153,N=1157)	Normal	3.6346	GTEX-12WSB-0011-R6b-SM-5GU6J
GBM(T=153,N=1157)	Normal	4.5361	GTEX-ZAK1-3026-SM-5S2MJ
GBM(T=153,N=1157)	Normal	3.5373	GTEX-13S7M-0011-R7a-SM-5O9DK
GBM(T=153,N=1157)	Normal	3.7708	GTEX-ZVT3-0011-R10b-SM-57WB6
GBM(T=153,N=1157)	Normal	4.0738	GTEX-QDT8-0011-R6A-SM-32PKI
GBM(T=153,N=1157)	Normal	6.1152	GTEX-11PRG-2826-SM-5BC54
GBM(T=153,N=1157)	Normal	3.8827	GTEX-ZE7O-0011-R6a-SM-57WCI
GBM(T=153,N=1157)	Normal	4.504	GTEX-12WSM-0011-R8a-SM-5DUWJ
GBM(T=153,N=1157)	Normal	3.9809	GTEX-13PDP-0011-R8b-SM-5O9CS
GBM(T=153,N=1157)	Normal	4.1457	GTEX-13NYB-0011-R8a-SM-5KM4R
GBM(T=153,N=1157)	Normal	4.2623	GTEX-P44H-0011-R5A-SM-2XCEX
GBM(T=153,N=1157)	Normal	4.4535	GTEX-13SLW-0011-R10a-SM-5S2UI
GBM(T=153,N=1157)	Normal	3.7388	GTEX-Q2AG-0011-R9A-SM-2HMJ6
GBM(T=153,N=1157)	Normal	4.1707	GTEX-14BIM-0011-R6b-SM-5S2VB
GBM(T=153,N=1157)	Normal	5.2149	GTEX-144FL-3026-SM-5O99C
GBM(T=153,N=1157)	Normal	4.546	GTEX-13FLV-0011-R8a-SM-5LZZE
GBM(T=153,N=1157)	Normal	4.1482	GTEX-13CF2-0011-R8b-SM-5IJCX
GBM(T=153,N=1157)	Normal	4.0934	GTEX-131YS-3126-SM-5KLYT
GBM(T=153,N=1157)	Normal	4.4542	GTEX-13OW7-3026-SM-5L3GY
GBM(T=153,N=1157)	Normal	4.3312	GTEX-13SLX-0011-R8b-SM-5PNWZ
GBM(T=153,N=1157)	Normal	4.067	GTEX-139T8-0011-R4a-SM-5HL54
GBM(T=153,N=1157)	Normal	3.7071	GTEX-145LU-0011-R3a-SM-5P9K2
GBM(T=153,N=1157)	Normal	4.7767	GTEX-WHSE-0011-R2A-SM-3P5ZL
GBM(T=153,N=1157)	Normal	4.5273	GTEX-13FXS-0011-R5b-SM-5LZYE
GBM(T=153,N=1157)	Normal	5.1052	GTEX-13N2G-0011-R9b-SM-5MR4E
GBM(T=153,N=1157)	Normal	4.4033	GTEX-13O3O-3126-SM-5KM3H
GBM(T=153,N=1157)	Normal	5.3795	GTEX-13NZA-0011-R11b-SM-5KM4W
GBM(T=153,N=1157)	Normal	5.3737	GTEX-13FLV-0011-R11a-SM-5LZZ7
GBM(T=153,N=1157)	Normal	4.2653	GTEX-13OW8-0011-R3a-SM-5L3I4
GBM(T=153,N=1157)	Normal	4.1747	GTEX-S7SE-0011-R5A-SM-2XCDA
GBM(T=153,N=1157)	Normal	4.8354	GTEX-13X6I-0011-R5a-SM-5PNWW
GBM(T=153,N=1157)	Normal	4.6628	GTEX-NPJ7-0011-R8a-SM-2I3G2
GBM(T=153,N=1157)	Normal	5.1831	GTEX-X4XX-0011-R8B-SM-46MWM
GBM(T=153,N=1157)	Normal	4.6165	GTEX-WVLH-0011-R5A-SM-3MJFW
GBM(T=153,N=1157)	Normal	4.1954	GTEX-13FLW-0011-R5a-SM-5LZX6
GBM(T=153,N=1157)	Normal	5.7879	GTEX-R55E-2526-SM-2TC6H
GBM(T=153,N=1157)	Normal	5.5801	GTEX-11ZTS-3226-SM-5EGID
GBM(T=153,N=1157)	Normal	5.1898	GTEX-13N2G-0011-R4b-SM-5MR54
GBM(T=153,N=1157)	Normal	3.1375	GTEX-YJ89-0011-R7a-SM-4V6GO
GBM(T=153,N=1157)	Normal	4.1384	GTEX-UTHO-0011-R3A-SM-3GIK8
GBM(T=153,N=1157)	Normal	3.9505	GTEX-13O3Q-0011-R6a-SM-5KM2V
GBM(T=153,N=1157)	Normal	4.4842	GTEX-N7MT-0011-R4a-SM-2I3G9
GBM(T=153,N=1157)	Normal	3.4142	GTEX-ZXG5-0011-R7b-SM-57WCC
GBM(T=153,N=1157)	Normal	4.3505	GTEX-ZAB4-0011-R5a-SM-4SOKC
GBM(T=153,N=1157)	Normal	4.9869	GTEX-X4EP-0011-R7B-SM-4PQZW
GBM(T=153,N=1157)	Normal	4.2055	GTEX-139UC-0011-R6b-SM-5K7Z1
GBM(T=153,N=1157)	Normal	4.6461	GTEX-12WSC-0011-R9a-SM-5GU4U
GBM(T=153,N=1157)	Normal	4.2817	GTEX-P44G-0011-R5A-SM-2I3FA
GBM(T=153,N=1157)	Normal	4.2032	GTEX-11WQK-0011-R9b-SM-5BC6N
GBM(T=153,N=1157)	Normal	6.0279	GTEX-X4EP-0011-R2B-SM-3P625
GBM(T=153,N=1157)	Normal	5.9215	GTEX-13NYB-3226-SM-5J2ND
GBM(T=153,N=1157)	Normal	4.1731	GTEX-11H98-0011-R8a-SM-5NQ8V
GBM(T=153,N=1157)	Normal	5.7613	GTEX-N7MS-2526-SM-2D7W3
GBM(T=153,N=1157)	Normal	5.4252	GTEX-13N1W-0011-R11a-SM-5MR3D
GBM(T=153,N=1157)	Normal	4.5285	GTEX-13PLJ-0011-R9b-SM-5O9DV
GBM(T=153,N=1157)	Normal	4.0418	GTEX-13PLJ-0011-R5a-SM-5O9BG
GBM(T=153,N=1157)	Normal	5.79	GTEX-144GL-2926-SM-5O99F
GBM(T=153,N=1157)	Normal	5.6419	GTEX-XOTO-2926-SM-4B65G
GBM(T=153,N=1157)	Normal	4.3806	GTEX-S7SE-0011-R10A-SM-2XCDF
GBM(T=153,N=1157)	Normal	5.8342	GTEX-139TT-2626-SM-5LZUB
GBM(T=153,N=1157)	Normal	5.8994	GTEX-X4XX-0011-R2A-SM-3P623
GBM(T=153,N=1157)	Normal	5.1862	GTEX-OHPN-0011-R9A-SM-4DXUH
GBM(T=153,N=1157)	Normal	5.1937	GTEX-ZVZQ-0011-R11a-SM-51MS6
GBM(T=153,N=1157)	Normal	2.862	GTEX-13CF2-0011-R7b-SM-5K7UV
GBM(T=153,N=1157)	Normal	2.8639	GTEX-13PL6-0011-R6a-SM-5O9C5
GBM(T=153,N=1157)	Normal	4.6548	GTEX-YFC4-0011-R2a-SM-4V6DZ
GBM(T=153,N=1157)	Normal	4.3541	GTEX-QVJO-0011-R2A-SM-2S1QK
GBM(T=153,N=1157)	Normal	4.3052	GTEX-131YS-0011-R9b-SM-5EQLY
GBM(T=153,N=1157)	Normal	3.5656	GTEX-145MG-0011-R3b-SM-5SI67
GBM(T=153,N=1157)	Normal	4.4568	GTEX-OXRO-0011-R2A-SM-3NB1W
GBM(T=153,N=1157)	Normal	4.8385	GTEX-QVUS-2826-SM-3GADB
GBM(T=153,N=1157)	Normal	4.7345	GTEX-11GSP-0011-R5a-SM-57WBE
GBM(T=153,N=1157)	Normal	3.6416	GTEX-ZVT3-0011-R3b-SM-51MTJ
GBM(T=153,N=1157)	Normal	5.4744	GTEX-Z93S-0011-R11a-SM-4RGNN
GBM(T=153,N=1157)	Normal	4.5078	GTEX-11GS4-3126-SM-5A5LH
GBM(T=153,N=1157)	Normal	4.4522	GTEX-13FHO-0011-R7b-SM-5LZXD
GBM(T=153,N=1157)	Normal	5.1106	GTEX-13FHO-3026-SM-5J1O9
GBM(T=153,N=1157)	Normal	4.464	GTEX-P44G-0011-R2A-SM-2XCD2
GBM(T=153,N=1157)	Normal	3.6288	GTEX-13RTL-0011-R1a-SM-5PNZ8
GBM(T=153,N=1157)	Normal	5.8339	GTEX-12WSF-0011-R11a-SM-5LZVT
GBM(T=153,N=1157)	Normal	3.9079	GTEX-13112-0011-R6b-SM-5DUVK
GBM(T=153,N=1157)	Normal	5.7485	GTEX-13OVL-0011-R11b-SM-5L3G7
GBM(T=153,N=1157)	Normal	5.3075	GTEX-ZAJG-3126-SM-5HL9J
GBM(T=153,N=1157)	Normal	3.9364	GTEX-P44G-0011-R1A-SM-2I3FE
GBM(T=153,N=1157)	Normal	5.4009	GTEX-1192X-3126-SM-5N9BY
GBM(T=153,N=1157)	Normal	4.2691	GTEX-13N2G-0011-R1b-SM-5MR3G
GBM(T=153,N=1157)	Normal	2.9069	GTEX-ZV68-0011-R6a-SM-51MSR
GBM(T=153,N=1157)	Normal	3.9059	GTEX-QVUS-0011-R3A-SM-3GAFD
GBM(T=153,N=1157)	Normal	5.1367	GTEX-OHPN-0011-R9A-SM-2YUMN
GBM(T=153,N=1157)	Normal	4.1635	GTEX-13SLW-0011-R1a-SM-5S2W7
GBM(T=153,N=1157)	Normal	4.4963	GTEX-N7MT-0011-R7a-SM-2I3FZ
GBM(T=153,N=1157)	Normal	4.5862	GTEX-13IVO-0011-R8a-SM-5L3DY
GBM(T=153,N=1157)	Normal	5.6617	GTEX-Q2AG-0011-R11A-SM-2HMKZ
GBM(T=153,N=1157)	Normal	4.0557	GTEX-144GL-0011-R5b-SM-5PNUJ
GBM(T=153,N=1157)	Normal	4.2441	GTEX-144GL-0011-R3a-SM-5P9HP
GBM(T=153,N=1157)	Normal	4.8104	GTEX-R55E-0011-R9A-SM-2TC6C
GBM(T=153,N=1157)	Normal	4.9136	GTEX-13X6J-0011-R11a-SM-5P9HE
GBM(T=153,N=1157)	Normal	5.6893	GTEX-R55F-1226-SM-2TF59
GBM(T=153,N=1157)	Normal	4.9699	GTEX-13CZV-0011-R11b-SM-5N9FN
GBM(T=153,N=1157)	Normal	4.393	GTEX-144GO-0011-R5a-SM-5PNUR
GBM(T=153,N=1157)	Normal	4.6582	GTEX-N7MT-0011-R3a-SM-2I3GC
GBM(T=153,N=1157)	Normal	4.0134	GTEX-132Q8-0011-R10b-SM-5DUWZ
GBM(T=153,N=1157)	Normal	3.4449	GTEX-13PL6-0011-R9b-SM-5O9CH
GBM(T=153,N=1157)	Normal	5.5323	GTEX-QMR6-0011-R11A-SM-32PKK
GBM(T=153,N=1157)	Normal	4.4549	GTEX-ZDXO-0011-R8a-SM-4WWD7
GBM(T=153,N=1157)	Normal	4.6305	GTEX-11EMC-3226-SM-5EGKW
GBM(T=153,N=1157)	Normal	4.1635	GTEX-P44G-0011-R3A-SM-2I3FC
GBM(T=153,N=1157)	Normal	3.5147	GTEX-12ZZW-0011-R10b-SM-5HL9X
GBM(T=153,N=1157)	Normal	3.7772	GTEX-12WSE-0011-R6b-SM-5LZV5
GBM(T=153,N=1157)	Normal	3.2095	GTEX-13FHP-0011-R1b-SM-5K7XL
GBM(T=153,N=1157)	Normal	4.8654	GTEX-XMD1-0011-R10A-SM-4AT4A
GBM(T=153,N=1157)	Normal	3.7093	GTEX-12WSD-0011-R3b-SM-5LZWN
GBM(T=153,N=1157)	Normal	4.2172	GTEX-WZTO-0011-R8A-SM-4E3II
GBM(T=153,N=1157)	Normal	5.054	GTEX-13FXS-0011-R9a-SM-5K7UI
GBM(T=153,N=1157)	Normal	4	GTEX-13O3Q-0011-R10b-SM-5KM39
GBM(T=153,N=1157)	Normal	4.2319	GTEX-131YS-0011-R4a-SM-5DUVL
GBM(T=153,N=1157)	Normal	5.7125	GTEX-13N2G-0011-R10a-SM-5MR34
GBM(T=153,N=1157)	Normal	4.0866	GTEX-13OW8-0011-R6b-SM-5L3I3
GBM(T=153,N=1157)	Normal	4.1169	GTEX-13FLV-0011-R4a-SM-5LZYU
GBM(T=153,N=1157)	Normal	3.9458	GTEX-ZVZQ-0011-R10b-SM-51MRT
GBM(T=153,N=1157)	Normal	4.4256	GTEX-131XH-0011-R1a-SM-5DUWA
GBM(T=153,N=1157)	Normal	3.7474	GTEX-P44H-0011-R10A-SM-2XCEK
GBM(T=153,N=1157)	Normal	3.3162	GTEX-13OW7-0011-R4b-SM-5O9CX
GBM(T=153,N=1157)	Normal	4.7855	GTEX-13OVH-0011-R6b-SM-5LUAX
GBM(T=153,N=1157)	Normal	5.1977	GTEX-13NYS-0011-R9b-SM-5MR44
GBM(T=153,N=1157)	Normal	3.2373	GTEX-RU72-0011-R10A-SM-2TF6D
GBM(T=153,N=1157)	Normal	5.2368	GTEX-13OVJ-2826-SM-5L3GW
GBM(T=153,N=1157)	Normal	6.0739	GTEX-11GSO-3026-SM-5Q5AL
GBM(T=153,N=1157)	Normal	4.3937	GTEX-WHSE-0011-R1A-SM-3P5ZK
GBM(T=153,N=1157)	Normal	0	GTEX-T6MN-0011-R4A-SM-5CHSD
GBM(T=153,N=1157)	Normal	4.4463	GTEX-ZUA1-3026-SM-59HJC
GBM(T=153,N=1157)	Normal	4.7777	GTEX-11GSP-0011-R8b-SM-5NQ79
GBM(T=153,N=1157)	Normal	2.9126	GTEX-YJ89-0011-R2b-SM-4RGLT
GBM(T=153,N=1157)	Normal	4.3737	GTEX-Q2AG-0011-R10A-SM-2HMLA
GBM(T=153,N=1157)	Normal	4.4202	GTEX-WL46-0011-R5A-SM-3LK6V
GBM(T=153,N=1157)	Normal	3.645	GTEX-145MG-0011-R7b-SM-5P9JY
GBM(T=153,N=1157)	Normal	5.572	GTEX-X4EP-0011-R9B-SM-4QASI
GBM(T=153,N=1157)	Normal	5.8158	GTEX-13112-2926-SM-5DUWT
GBM(T=153,N=1157)	Normal	0	GTEX-TSE9-0011-R7A-SM-5CHS2
GBM(T=153,N=1157)	Normal	3.2464	GTEX-11WQC-0011-R7b-SM-5BC7A
GBM(T=153,N=1157)	Normal	3.8359	GTEX-12ZZZ-0011-R7b-SM-5EGLE
GBM(T=153,N=1157)	Normal	3.3855	GTEX-13RTL-0011-R3a-SM-5P9JP
GBM(T=153,N=1157)	Normal	6.4217	GTEX-13FHO-0011-R11b-SM-5LZYQ
GBM(T=153,N=1157)	Normal	4.5292	GTEX-Q2AG-0011-R5A-SM-2HMJH
GBM(T=153,N=1157)	Normal	4.5422	GTEX-13OVH-0011-R8b-SM-5MR35
GBM(T=153,N=1157)	Normal	4.2456	GTEX-147GR-0011-R6b-SM-5S2RO
GBM(T=153,N=1157)	Normal	4.6005	GTEX-132Q8-0011-R5a-SM-5IJDM
GBM(T=153,N=1157)	Normal	4.4918	GTEX-WZTO-0011-R5B-SM-3NMC5
GBM(T=153,N=1157)	Normal	3.857	GTEX-11ONC-0011-R1a-SM-57WD4
GBM(T=153,N=1157)	Normal	3.4982	GTEX-14BIN-0011-R10a-SM-5S2UA
GBM(T=153,N=1157)	Normal	4.0357	GTEX-T2IS-0011-R6A-SM-32QP2
GBM(T=153,N=1157)	Normal	3.4777	GTEX-144GL-0011-R8a-SM-5Q5B1
GBM(T=153,N=1157)	Normal	5.9892	GTEX-13QIC-3026-SM-5LU58
GBM(T=153,N=1157)	Normal	3.3799	GTEX-1313W-0011-R10b-SM-5DUXA
GBM(T=153,N=1157)	Normal	5.0228	GTEX-YFC4-0011-R9a-SM-4SOK4
GBM(T=153,N=1157)	Normal	4.1643	GTEX-13O3Q-2926-SM-5KM45
GBM(T=153,N=1157)	Normal	4.3505	GTEX-12126-0011-R9b-SM-5BC6P
GBM(T=153,N=1157)	Normal	3.8895	GTEX-ZXG5-0011-R5b-SM-57WBN
GBM(T=153,N=1157)	Normal	4.2357	GTEX-13OW7-0011-R1b-SM-5L3HF
GBM(T=153,N=1157)	Normal	3.6053	GTEX-13112-0011-R5b-SM-5DUV8
GBM(T=153,N=1157)	Normal	4.4738	GTEX-T6MN-0011-R6A-SM-32QP8
GBM(T=153,N=1157)	Normal	3.342	GTEX-12584-0011-R6a-SM-5NQ7C
GBM(T=153,N=1157)	Normal	6.3298	GTEX-13PDP-2926-SM-5N9E8
GBM(T=153,N=1157)	Normal	4.0942	GTEX-ZE9C-0011-R5a-SM-5EGLO
GBM(T=153,N=1157)	Normal	3.2449	GTEX-139UC-0011-R3b-SM-5K7VZ
GBM(T=153,N=1157)	Normal	3.3757	GTEX-12WSC-0011-R10a-SM-5GU57
GBM(T=153,N=1157)	Normal	6.0139	GTEX-117XS-3126-SM-5GIDP
GBM(T=153,N=1157)	Normal	4.3957	GTEX-XOTO-0011-R8A-SM-4B65J
GBM(T=153,N=1157)	Normal	4.1009	GTEX-11H98-0011-R10b-SM-5NQ98
GBM(T=153,N=1157)	Normal	3.9588	GTEX-11OF3-0011-R7a-SM-57WCG
GBM(T=153,N=1157)	Normal	5.0228	GTEX-14ASI-3026-SM-5S2PN
GBM(T=153,N=1157)	Normal	5.9866	GTEX-NPJ8-2626-SM-26GMI
GBM(T=153,N=1157)	Normal	4.7761	GTEX-13CIG-0011-R9a-SM-5K7VU
GBM(T=153,N=1157)	Normal	4.6206	GTEX-WWYW-0011-R1A-SM-3TW8G
GBM(T=153,N=1157)	Normal	4.0566	GTEX-NL4W-0011-R6a-SM-2I3GA
GBM(T=153,N=1157)	Normal	4.5261	GTEX-NPJ7-0011-R10A-SM-2I3E5
GBM(T=153,N=1157)	Normal	4.0409	GTEX-13NYB-0011-R7a-SM-5MR5D
GBM(T=153,N=1157)	Normal	4.09	GTEX-13FLW-0011-R8b-SM-5J1MZ
GBM(T=153,N=1157)	Normal	4.1318	GTEX-Q2AG-0011-R8A-SM-2HMK5
GBM(T=153,N=1157)	Normal	4.8914	GTEX-13X6K-0011-R3b-SM-5PNUD
GBM(T=153,N=1157)	Normal	4.8033	GTEX-X585-0011-R1B-SM-46MVE
GBM(T=153,N=1157)	Normal	6.4133	GTEX-13N2G-0011-R5a-SM-5MR33
GBM(T=153,N=1157)	Normal	2.5849	GTEX-RVPU-0011-R6A-SM-2XCAC
GBM(T=153,N=1157)	Normal	5.6011	GTEX-13X6I-0011-R11a-SM-5P9HN
GBM(T=153,N=1157)	Normal	4.6171	GTEX-13S7M-3126-SM-5RQJQ
GBM(T=153,N=1157)	Normal	3.9393	GTEX-ZDXO-0011-R3a-SM-4WKFS
GBM(T=153,N=1157)	Normal	4.4574	GTEX-13RTJ-0011-R3a-SM-5PNX7
GBM(T=153,N=1157)	Normal	3.5753	GTEX-139UC-0011-R4a-SM-5K7XM
GBM(T=153,N=1157)	Normal	4.8053	GTEX-X261-0011-R8A-SM-4E3I5
GBM(T=153,N=1157)	Normal	6.2319	GTEX-12126-0926-SM-5FQTW
GBM(T=153,N=1157)	Normal	4.477	GTEX-14ASI-0011-R8b-SM-5S2UB
GBM(T=153,N=1157)	Normal	5.3008	GTEX-14A5I-2826-SM-5SIBF
GBM(T=153,N=1157)	Normal	4.6713	GTEX-12WSA-0011-R2a-SM-57WDK
GBM(T=153,N=1157)	Normal	4.5723	GTEX-NPJ7-0011-R1a-SM-3GACT
GBM(T=153,N=1157)	Normal	4.7913	GTEX-13N2G-0011-R6b-SM-5MR3P
GBM(T=153,N=1157)	Normal	4.1202	GTEX-NPJ7-0011-R4a-SM-2I3GJ
GBM(T=153,N=1157)	Normal	4.1858	GTEX-NL3H-0011-R6a-SM-2I3G8
GBM(T=153,N=1157)	Normal	4.391	GTEX-ZAB4-0011-R10a-SM-4SOKH
GBM(T=153,N=1157)	Normal	5.9876	GTEX-13SLW-0011-R11a-SM-5SI8Q
GBM(T=153,N=1157)	Normal	5.144	GTEX-11WQK-3026-SM-5EQL6
GBM(T=153,N=1157)	Normal	2.9392	GTEX-131XW-0011-R6b-SM-5K7XY
GBM(T=153,N=1157)	Normal	5.5295	GTEX-N7MT-1126-SM-2YUNQ
GBM(T=153,N=1157)	Normal	4.4654	GTEX-WL46-2926-SM-3LK82
GBM(T=153,N=1157)	Normal	5.8537	GTEX-ZDXO-2926-SM-4WKFM
GBM(T=153,N=1157)	Normal	3.7366	GTEX-1399T-0011-R4b-SM-5DUVX
GBM(T=153,N=1157)	Normal	3.6837	GTEX-12ZZW-0011-R7a-SM-5DUWC
GBM(T=153,N=1157)	Normal	3.9467	GTEX-1445S-0011-R2b-SM-5PNUH
GBM(T=153,N=1157)	Normal	5.6565	GTEX-R55E-0011-R11A-SM-2TC6I
GBM(T=153,N=1157)	Normal	5.7029	GTEX-QMR6-1326-SM-32PLB
GBM(T=153,N=1157)	Normal	4.3219	GTEX-147F4-0011-R8b-SM-5S2UN
GBM(T=153,N=1157)	Normal	3.1859	GTEX-139TS-0011-R10a-SM-5K7TU
GBM(T=153,N=1157)	Normal	3.5632	GTEX-12WSB-0011-R7b-SM-5GU6V
GBM(T=153,N=1157)	Normal	6.1987	GTEX-13IVO-0011-R11b-SM-5LZXQ
GBM(T=153,N=1157)	Normal	3.8904	GTEX-1212Z-0011-R1b-SM-5BC72
GBM(T=153,N=1157)	Normal	4.588	GTEX-Q2AG-0011-R2A-SM-2HMIT
GBM(T=153,N=1157)	Normal	4.0721	GTEX-11H98-0011-R5b-SM-57WCF
GBM(T=153,N=1157)	Normal	3.0789	GTEX-ZV68-0011-R7a-SM-51MT4
GBM(T=153,N=1157)	Normal	3.2494	GTEX-12ZZY-0011-R10b-SM-5HL7W
GBM(T=153,N=1157)	Normal	3.8846	GTEX-12WSC-0011-R5b-SM-5CVNS
GBM(T=153,N=1157)	Normal	4.749	GTEX-11GSO-2926-SM-5HL73
GBM(T=153,N=1157)	Normal	3.8318	GTEX-13O3O-0011-R10a-SM-5LUA9
GBM(T=153,N=1157)	Normal	4.1643	GTEX-12WSF-0011-R1a-SM-5DUVI
GBM(T=153,N=1157)	Normal	3.5741	GTEX-12WSM-0011-R7b-SM-5EGLD
GBM(T=153,N=1157)	Normal	4.4423	GTEX-139UC-3126-SM-5J1OY
GBM(T=153,N=1157)	Normal	4.4175	GTEX-11GSP-0011-R10a-SM-5NQ7J
GBM(T=153,N=1157)	Normal	4.1293	GTEX-ZF28-0011-R8a-SM-4WWFW
GBM(T=153,N=1157)	Normal	3.2032	GTEX-RVPU-0011-R3A-SM-2XCAE
GBM(T=153,N=1157)	Normal	4.2987	GTEX-RNOR-0011-R3A-SM-2TF5J
GBM(T=153,N=1157)	Normal	4.8268	GTEX-13OVJ-0011-R2b-SM-5L3GP
GBM(T=153,N=1157)	Normal	4.1144	GTEX-QMR6-0011-R5A-SM-32PKT
GBM(T=153,N=1157)	Normal	5.281	GTEX-11WQC-0011-R11b-SM-57WD6
GBM(T=153,N=1157)	Normal	5.9766	GTEX-11DXW-1026-SM-5H11K
GBM(T=153,N=1157)	Normal	4.303	GTEX-ZE9C-0011-R2a-SM-4WKGH
GBM(T=153,N=1157)	Normal	2.0976	GTEX-14753-0011-R8b-SM-5S2U1
GBM(T=153,N=1157)	Normal	4.6148	GTEX-13FHP-3026-SM-5IJBS
GBM(T=153,N=1157)	Normal	4.2204	GTEX-13VXU-0011-R7b-SM-5SI72
GBM(T=153,N=1157)	Normal	2.6299	GTEX-12WSE-0011-R7a-SM-5PNWF
GBM(T=153,N=1157)	Normal	5.465	GTEX-X585-3026-SM-46MWF
GBM(T=153,N=1157)	Normal	4.3067	GTEX-12WSF-0011-R10a-SM-5LZVH
GBM(T=153,N=1157)	Normal	3.278	GTEX-ZE9C-0011-R4a-SM-4WKH6
GBM(T=153,N=1157)	Normal	5.5726	GTEX-14BIN-0011-R11a-SM-5SI79
GBM(T=153,N=1157)	Normal	4.5354	GTEX-12ZZX-2926-SM-5GCOQ
GBM(T=153,N=1157)	Normal	5.9338	GTEX-Y8DK-0011-R11A-SM-4SOK2
GBM(T=153,N=1157)	Normal	4.9355	GTEX-WZTO-2926-SM-3NM9I
GBM(T=153,N=1157)	Normal	4.9708	GTEX-WWYW-0011-R5A-SM-3NB3E
GBM(T=153,N=1157)	Normal	4.3978	GTEX-13QJC-0011-R2b-SM-5PNUN
GBM(T=153,N=1157)	Normal	3.9088	GTEX-13SLX-0011-R10a-SM-5P9HV
GBM(T=153,N=1157)	Normal	5.5954	GTEX-RVPV-0011-R11A-SM-2TF6F
GBM(T=153,N=1157)	Normal	3.8042	GTEX-12WSA-0011-R7b-SM-5GU5U
GBM(T=153,N=1157)	Normal	5.202	GTEX-1269C-3126-SM-5EGI6
GBM(T=153,N=1157)	Normal	4.0575	GTEX-11WQK-0011-R10a-SM-5BC6R
GBM(T=153,N=1157)	Normal	4.9093	GTEX-13OVJ-0011-R1b-SM-5L3I6
GBM(T=153,N=1157)	Normal	4.4705	GTEX-139TS-0011-R2b-SM-5J1MX
GBM(T=153,N=1157)	Normal	3.7049	GTEX-11OF3-0011-R6b-SM-57WBG
GBM(T=153,N=1157)	Normal	4.1342	GTEX-13FHO-0011-R3b-SM-5K7YA
GBM(T=153,N=1157)	Normal	4.5354	GTEX-RU72-0011-R5A-SM-2TF6U
GBM(T=153,N=1157)	Normal	4.5681	GTEX-13OVL-0011-R1a-SM-5L3H5
GBM(T=153,N=1157)	Normal	6.382	GTEX-X4XX-0011-R11A-SM-46MWQ
GBM(T=153,N=1157)	Normal	4.009	GTEX-ZF28-0011-R5a-SM-4WWCZ
GBM(T=153,N=1157)	Normal	5.0819	GTEX-NPJ7-0011-R9a-SM-2TC5R
GBM(T=153,N=1157)	Normal	4.2787	GTEX-13OW6-0011-R10a-SM-5L3HE
GBM(T=153,N=1157)	Normal	3.856	GTEX-T6MN-0011-R1A-SM-32QOY
GBM(T=153,N=1157)	Normal	3.8599	GTEX-RVPU-0011-R7A-SM-2XCAB
GBM(T=153,N=1157)	Normal	4.5001	GTEX-11GSP-0011-R7b-SM-57WC3
GBM(T=153,N=1157)	Normal	4.1416	GTEX-12ZZX-0011-R6a-SM-5HL8L
GBM(T=153,N=1157)	Normal	3.4276	GTEX-131XW-0011-R10a-SM-5DUVA
GBM(T=153,N=1157)	Normal	4.1619	GTEX-UTHO-0011-R6A-SM-3GIJW
GBM(T=153,N=1157)	Normal	5.8826	GTEX-13VXU-3026-SM-5LU3K
GBM(T=153,N=1157)	Normal	4.8033	GTEX-T2IS-0011-R2A-SM-32QPF
GBM(T=153,N=1157)	Normal	4.6803	TCGA-06-0681-11
GBM(T=153,N=1157)	Normal	6.4373	GTEX-131XH-2926-SM-5LZU4
GBM(T=153,N=1157)	Normal	3.5422	GTEX-139UC-0011-R5b-SM-5K7VY
GBM(T=153,N=1157)	Normal	3.8924	GTEX-QDT8-0011-R5A-SM-32PKN
GBM(T=153,N=1157)	Normal	3.6485	GTEX-13G51-0011-R10b-SM-5LZYF
GBM(T=153,N=1157)	Normal	4.4873	GTEX-11DXW-1126-SM-5H12Q
GBM(T=153,N=1157)	Normal	4.4777	GTEX-145LS-0011-R2a-SM-5PNZI
GBM(T=153,N=1157)	Normal	3.6206	GTEX-WL46-0011-R10A-SM-3MJFQ
GBM(T=153,N=1157)	Normal	4.1326	GTEX-12WS9-0011-R6a-SM-5P9EW
GBM(T=153,N=1157)	Normal	3.9232	GTEX-147GR-0011-R7a-SM-5S2RP
GBM(T=153,N=1157)	Normal	4.5515	GTEX-13PL6-3126-SM-5LUAR
GBM(T=153,N=1157)	Normal	5.6212	GTEX-12WSH-0011-R11a-SM-5LZVM
GBM(T=153,N=1157)	Normal	4.275	GTEX-13SLX-0011-R2b-SM-5S2VP
GBM(T=153,N=1157)	Normal	5.1127	GTEX-WHSE-0011-R4A-SM-3P5ZN
GBM(T=153,N=1157)	Normal	3.4931	GTEX-12ZZW-0011-R3a-SM-5DUWW
GBM(T=153,N=1157)	Normal	4.8689	GTEX-13X6K-0011-R2b-SM-5P9K3
GBM(T=153,N=1157)	Normal	4.1424	GTEX-13X6I-0011-R10a-SM-5PNWI
GBM(T=153,N=1157)	Normal	6.1757	GTEX-14BIM-0011-R11b-SM-5S2RN
GBM(T=153,N=1157)	Normal	4.8374	GTEX-R55F-0011-R8A-SM-2TF4F
GBM(T=153,N=1157)	Normal	4.86	GTEX-11UD1-0011-R2b-SM-5BC6O
GBM(T=153,N=1157)	Normal	2.9049	GTEX-147F4-0011-R6b-SM-5S2UP
GBM(T=153,N=1157)	Normal	6.4688	GTEX-X585-0011-R11B-SM-46MUZ
GBM(T=153,N=1157)	Normal	4.6129	GTEX-13SLX-3126-SM-5S2Q5
GBM(T=153,N=1157)	Normal	3.7474	GTEX-11NV4-0011-R6a-SM-57WD5
GBM(T=153,N=1157)	Normal	3.5583	GTEX-13CZV-0011-R7b-SM-5LZXH
GBM(T=153,N=1157)	Normal	3.7474	GTEX-145LU-0011-R10a-SM-5PNWJ
GBM(T=153,N=1157)	Normal	4.3964	GTEX-ZAB4-0011-R2a-SM-4RGNP
GBM(T=153,N=1157)	Normal	4.9482	GTEX-11O72-2926-SM-5BC4V
GBM(T=153,N=1157)	Normal	4.0789	GTEX-12WSH-0011-R10a-SM-5LZUS
GBM(T=153,N=1157)	Normal	4.1243	GTEX-13FXS-0011-R6b-SM-5L3F7
GBM(T=153,N=1157)	Normal	3.6826	GTEX-1313W-0011-R4b-SM-5KLZV
GBM(T=153,N=1157)	Normal	4.6381	GTEX-Y8DK-0011-R6A-SM-4V6EG
GBM(T=153,N=1157)	Normal	4.2234	GTEX-R55E-0011-R7A-SM-2TC5Z
GBM(T=153,N=1157)	Normal	3.925	GTEX-131YS-0011-R1a-SM-5DUXC
GBM(T=153,N=1157)	Normal	4.4141	GTEX-13OW6-0011-R7b-SM-5L3H4
GBM(T=153,N=1157)	Normal	4.867	GTEX-ZVT3-3026-SM-5E43N
GBM(T=153,N=1157)	Normal	3.2296	GTEX-13X6J-0011-R10b-SM-5PNWA
GBM(T=153,N=1157)	Normal	5.9336	GTEX-11GSP-3126-SM-5A5LL
GBM(T=153,N=1157)	Normal	3.9755	GTEX-13PL6-0011-R5b-SM-5O9BI
GBM(T=153,N=1157)	Normal	4.4693	GTEX-11WQC-0011-R8b-SM-57WCH
GBM(T=153,N=1157)	Normal	4.9283	GTEX-13OVJ-0011-R4b-SM-5P9H5
GBM(T=153,N=1157)	Normal	4.3827	GTEX-13RTJ-0011-R2a-SM-5PNW9
GBM(T=153,N=1157)	Normal	3.9597	GTEX-13FLW-0011-R7b-SM-5L3EZ
GBM(T=153,N=1157)	Normal	4.6571	GTEX-XMD1-0011-R1A-SM-4AT4C
GBM(T=153,N=1157)	Normal	3.4699	GTEX-S7PM-0011-R6A-SM-3NM8F
GBM(T=153,N=1157)	Normal	4.2928	GTEX-139UW-0011-R11a-SM-5IJGN
GBM(T=153,N=1157)	Normal	5.8892	GTEX-1313W-3026-SM-5LZUZ
GBM(T=153,N=1157)	Normal	5.9312	GTEX-139UC-3226-SM-5N9EZ
GBM(T=153,N=1157)	Normal	4.813	GTEX-WL46-0011-R9A-SM-3MJFP
GBM(T=153,N=1157)	Normal	2.2449	GTEX-11ZU8-0011-R4a-SM-5BC6Y
GBM(T=153,N=1157)	Normal	3.6803	GTEX-NL3H-0011-R3a-SM-2I3GL
GBM(T=153,N=1157)	Normal	4.6153	GTEX-N7MT-0011-R1a-SM-5SI7S
GBM(T=153,N=1157)	Normal	4.6525	GTEX-13N1W-0011-R6a-SM-5MR43
GBM(T=153,N=1157)	Normal	4.2365	GTEX-13FLV-0011-R3b-SM-5LZYP
GBM(T=153,N=1157)	Normal	4.3785	GTEX-T5JC-0011-R6A-SM-5SI89
GBM(T=153,N=1157)	Normal	4.9231	GTEX-NPJ8-0011-R8a-SM-2HMLG
GBM(T=153,N=1157)	Normal	3.9709	GTEX-1445S-0011-R10a-SM-5PNWB
GBM(T=153,N=1157)	Normal	5.8731	GTEX-T2IS-2926-SM-32QPO
GBM(T=153,N=1157)	Normal	4.275	GTEX-131XW-0011-R11a-SM-5DUV9
GBM(T=153,N=1157)	Normal	5.96	GTEX-QVJO-1325-SM-2S1QX
GBM(T=153,N=1157)	Normal	4.5759	GTEX-XMD1-0011-R3B-SM-4AT5R
GBM(T=153,N=1157)	Normal	4.2795	GTEX-ZE7O-0011-R10a-SM-57WAZ
GBM(T=153,N=1157)	Normal	4.9141	GTEX-13G51-3026-SM-5IJB8
GBM(T=153,N=1157)	Normal	5.7679	GTEX-13FHP-0011-R11b-SM-5LZXP
GBM(T=153,N=1157)	Normal	5.8066	GTEX-WWYW-0011-R11A-SM-3NB38
GBM(T=153,N=1157)	Normal	4.0592	GTEX-14ABY-0011-R5b-SM-5SI7B
GBM(T=153,N=1157)	Normal	4.0487	GTEX-ZXG5-0011-R6a-SM-57WBZ
GBM(T=153,N=1157)	Normal	7.2598	GTEX-X4EP-3026-SM-3P5YP
GBM(T=153,N=1157)	Normal	4.4654	GTEX-13OW7-0011-R8b-SM-5L3HR
GBM(T=153,N=1157)	Normal	4.5317	GTEX-13RTJ-0011-R8b-SM-5O9DL
GBM(T=153,N=1157)	Normal	3.4568	GTEX-12ZZZ-0011-R4b-SM-5DUV7
GBM(T=153,N=1157)	Normal	3.85	GTEX-13CZV-0011-R3a-SM-5KM27
GBM(T=153,N=1157)	Normal	5.1578	GTEX-N7MS-0011-R11A-SM-2HMJS
GBM(T=153,N=1157)	Normal	3.5778	GTEX-12WSE-0011-R10b-SM-5P9JV
GBM(T=153,N=1157)	Normal	4.8207	GTEX-13SLW-0011-R5b-SM-5SI6Z
GBM(T=153,N=1157)	Normal	3.1473	GTEX-14753-0011-R10b-SM-5S2WE
GBM(T=153,N=1157)	Normal	5.3757	GTEX-13OW5-0011-R1b-SM-5L3GE
GBM(T=153,N=1157)	Normal	4.1659	GTEX-14ABY-0011-R4b-SM-5S2VN
GBM(T=153,N=1157)	Normal	4.009	GTEX-NL3H-0011-R10A-SM-2I3E9
GBM(T=153,N=1157)	Normal	6.0753	GTEX-145LU-2626-SM-5LU9Z
GBM(T=153,N=1157)	Normal	4.4816	GTEX-WHSE-0011-R6A-SM-3P5ZP
GBM(T=153,N=1157)	Normal	4.9307	GTEX-NPJ8-0011-R5a-SM-2HMJY
GBM(T=153,N=1157)	Normal	4.7618	GTEX-13OW6-0011-R8a-SM-5L3GF
GBM(T=153,N=1157)	Normal	3.757	GTEX-ZDXO-0011-R7a-SM-4WWCU
GBM(T=153,N=1157)	Normal	6.2206	GTEX-NPJ8-0011-R11A-SM-2YUMS
GBM(T=153,N=1157)	Normal	3.3406	GTEX-139TS-0011-R6a-SM-5J2OB
GBM(T=153,N=1157)	Normal	4.4848	GTEX-11NUK-2926-SM-5A5MD
GBM(T=153,N=1157)	Normal	4.5717	GTEX-131XW-0011-R9a-SM-5N9EO
GBM(T=153,N=1157)	Normal	2.623	GTEX-145LU-0011-R1a-SM-5Q5CE
GBM(T=153,N=1157)	Normal	4.2824	GTEX-145LS-0011-R4b-SM-5S2UT
GBM(T=153,N=1157)	Normal	4.2623	GTEX-ZF28-0011-R10a-SM-4WWEH
GBM(T=153,N=1157)	Normal	3.26	GTEX-144GO-0011-R1a-SM-5PNWO
GBM(T=153,N=1157)	Normal	4.3541	GTEX-NPJ8-0011-R7a-SM-2HMJV
GBM(T=153,N=1157)	Normal	5.0811	GTEX-X4EP-0011-R10B-SM-4QASJ
GBM(T=153,N=1157)	Normal	5.0513	GTEX-NPJ8-0011-R9a-SM-2YUN5
GBM(T=153,N=1157)	Normal	5.2437	GTEX-145MH-0011-R11a-SM-5P9HQ
GBM(T=153,N=1157)	Normal	4.4363	GTEX-QVUS-0011-R6A-SM-3GACX
GBM(T=153,N=1157)	Normal	4.1772	GTEX-WVLH-0011-R7A-SM-3MJFB
GBM(T=153,N=1157)	Normal	3.4789	GTEX-144GL-0011-R4a-SM-5PNUI
GBM(T=153,N=1157)	Normal	4.0018	GTEX-1445S-0011-R3a-SM-5P9HY
GBM(T=153,N=1157)	Normal	5.662	GTEX-14ABY-0011-R11a-SM-5SI7C
GBM(T=153,N=1157)	Normal	3.6577	GTEX-13OW6-0011-R4a-SM-5O9DX
GBM(T=153,N=1157)	Normal	4.5354	GTEX-ZVT3-0011-R8b-SM-57WDJ
GBM(T=153,N=1157)	Normal	4.528	GTEX-QVJO-0011-R4A-SM-2S1QL
GBM(T=153,N=1157)	Normal	5.7785	GTEX-X4EP-0011-R5A-SM-3P628
GBM(T=153,N=1157)	Normal	4.2653	GTEX-WVLH-0011-R2A-SM-3MJFJ
GBM(T=153,N=1157)	Normal	4.06	GTEX-13O3O-0011-R4b-SM-5KM3F
GBM(T=153,N=1157)	Normal	6.0661	GTEX-13OVJ-0011-R11a-SM-5P9H8
GBM(T=153,N=1157)	Normal	5.1755	GTEX-X4XX-0011-R7A-SM-46MWR
GBM(T=153,N=1157)	Normal	4.3819	GTEX-12WSB-0011-R5b-SM-5GU67
GBM(T=153,N=1157)	Normal	4.0197	GTEX-11ONC-0011-R9b-SM-5NQ8J
GBM(T=153,N=1157)	Normal	4.2126	GTEX-13JUV-0011-R10b-SM-5LZXR
GBM(T=153,N=1157)	Normal	4.4107	GTEX-13OW6-0011-R1a-SM-5L3HQ
GBM(T=153,N=1157)	Normal	6.1295	GTEX-13OW5-3126-SM-5MR3Y
GBM(T=153,N=1157)	Normal	5.7716	GTEX-12WSE-2926-SM-5RQJ9
GBM(T=153,N=1157)	Normal	0	GTEX-TSE9-2926-SM-5CHQO
GBM(T=153,N=1157)	Normal	6.1031	GTEX-13S7M-3026-SM-5S2QQ
GBM(T=153,N=1157)	Normal	6.2089	GTEX-13JUV-3026-SM-5K7WX
GBM(T=153,N=1157)	Normal	5.7963	GTEX-12ZZX-0011-R11a-SM-5DUVJ
GBM(T=153,N=1157)	Normal	4.7718	GTEX-13NYC-2826-SM-5K7WR
GBM(T=153,N=1157)	Normal	4.3298	GTEX-13O3O-0011-R5b-SM-5KM44
GBM(T=153,N=1157)	Normal	4.2312	GTEX-145LS-0011-R5a-SM-5SI65
GBM(T=153,N=1157)	Normal	4.5625	GTEX-13JVG-0011-R10b-SM-5KM2P
GBM(T=153,N=1157)	Normal	4.1707	GTEX-131XH-0011-R8a-SM-5EGLL
GBM(T=153,N=1157)	Normal	4.3212	TCGA-06-0675-11
GBM(T=153,N=1157)	Normal	3.2942	GTEX-139TT-0011-R5b-SM-5K7W8
GBM(T=153,N=1157)	Normal	4.6679	GTEX-1445S-3026-SM-5O9BR
GBM(T=153,N=1157)	Normal	4.3701	GTEX-RU72-3026-SM-5SI7Y
GBM(T=153,N=1157)	Normal	4.263	GTEX-N7MS-2425-SM-26GMD
GBM(T=153,N=1157)	Normal	3.3234	GTEX-N7MT-1226-SM-26GMT
GBM(T=153,N=1157)	Normal	5.8369	GTEX-N7MT-1226-SM-26GMC
GBM(T=153,N=1157)	Normal	6.0074	GTEX-ZUA1-2926-SM-59HL3
GBM(T=153,N=1157)	Normal	5.9537	GTEX-12WSM-2126-SM-5GCOC
GBM(T=153,N=1157)	Normal	3.9755	GTEX-1445S-0011-R4a-SM-5PNWN
GBM(T=153,N=1157)	Normal	4.0566	GTEX-ZE9C-0011-R7a-SM-4WWCX
GBM(T=153,N=1157)	Normal	3.8924	GTEX-1313W-0011-R6a-SM-5K7XO
GBM(T=153,N=1157)	Normal	3.2479	GTEX-13RTL-0011-R9a-SM-5Q5BR
GBM(T=153,N=1157)	Normal	3.9317	GTEX-13X6J-0011-R7b-SM-5PNUC
GBM(T=153,N=1157)	Normal	4.228	GTEX-145LS-0011-R1b-SM-5PNUP
GBM(T=153,N=1157)	Normal	4.2578	GTEX-13NYB-0011-R5a-SM-5MR45
GBM(T=153,N=1157)	Normal	4.2525	GTEX-QVUS-0011-R10A-SM-3GIK3
GBM(T=153,N=1157)	Normal	4.6241	GTEX-Q2AG-2926-SM-2HMJ3
GBM(T=153,N=1157)	Normal	6.3649	GTEX-13X6I-2926-SM-5Q5C3
GBM(T=153,N=1157)	Normal	3.6747	GTEX-13FTY-0011-R9b-SM-5KM2U
GBM(T=153,N=1157)	Normal	3.0161	GTEX-11ZVC-0011-R3a-SM-5BC6V
GBM(T=153,N=1157)	Normal	5.168	GTEX-13NYS-3126-SM-5KLYV
GBM(T=153,N=1157)	Normal	3.958	GTEX-13S7M-0011-R10b-SM-5PNZB
GBM(T=153,N=1157)	Normal	3.2388	GTEX-13CZV-0011-R4b-SM-5J2NY
GBM(T=153,N=1157)	Normal	4.1309	GTEX-131YS-0011-R7a-SM-5IJDA
GBM(T=153,N=1157)	Normal	4.0321	GTEX-1477Z-0011-R10b-SM-5S2RF
GBM(T=153,N=1157)	Normal	4.582	GTEX-13NYS-0011-R4b-SM-5MR3O
GBM(T=153,N=1157)	Normal	6.5246	GTEX-X4XX-2926-SM-3NMB1
GBM(T=153,N=1157)	Normal	5.3831	GTEX-NPJ8-1526-SM-2D7VU
GBM(T=153,N=1157)	Normal	4.6871	GTEX-WVLH-0011-R6A-SM-3MJFZ
GBM(T=153,N=1157)	Normal	4.1252	GTEX-14A5I-2926-SM-5Q5CQ
GBM(T=153,N=1157)	Normal	4.8928	GTEX-13PLJ-0011-R11b-SM-5O9BS
GBM(T=153,N=1157)	Normal	6.1091	GTEX-11TTK-2826-SM-5GU5K
GBM(T=153,N=1157)	Normal	4.5886	GTEX-13SLX-0011-R9b-SM-5SI6X
GBM(T=153,N=1157)	Normal	5.7955	GTEX-XMD1-2926-SM-4AT42
GBM(T=153,N=1157)	Normal	5.5217	GTEX-X585-0011-R5A-SM-46MVI
GBM(T=153,N=1157)	Normal	4.3248	GTEX-1399T-0011-R8b-SM-5IJD8
GBM(T=153,N=1157)	Normal	2.9837	GTEX-13O1R-0011-R9b-SM-5KM33
GBM(T=153,N=1157)	Normal	3.696	GTEX-13JVG-0011-R4a-SM-5MR4C
GBM(T=153,N=1157)	Normal	7.2155	GTEX-X4EP-0011-R11B-SM-4QASK
GBM(T=153,N=1157)	Normal	3.3618	GTEX-YJ89-0011-R5a-SM-4V6GM
GBM(T=153,N=1157)	Normal	4.4309	GTEX-14BIM-0011-R4b-SM-5S2RK
GBM(T=153,N=1157)	Normal	4.7366	GTEX-13SLW-0011-R8b-SM-5SI64
GBM(T=153,N=1157)	Normal	3.6565	GTEX-13QIC-0011-R8b-SM-5O9CV
GBM(T=153,N=1157)	Normal	4.3847	GTEX-N7MS-0011-R8a-SM-2YUMK
GBM(T=153,N=1157)	Normal	3.6656	GTEX-13NYB-0011-R10a-SM-5KM43
GBM(T=153,N=1157)	Normal	5.9964	GTEX-14BIN-3326-SM-5Q5E6
GBM(T=153,N=1157)	Normal	5.0211	GTEX-NPJ8-0011-R10A-SM-2YUMO
GBM(T=153,N=1157)	Normal	3.546	GTEX-1313W-0011-R5b-SM-5L3EP
GBM(T=153,N=1157)	Normal	4.691	GTEX-QVJO-0011-R10A-SM-2S1QJ
GBM(T=153,N=1157)	Normal	4.228	GTEX-Q2AG-0011-R4A-SM-2HMKA
GBM(T=153,N=1157)	Normal	2.6112	GTEX-RVPU-0011-R4A-SM-2TF6X
GBM(T=153,N=1157)	Normal	4.3016	GTEX-WHSE-0011-R7A-SM-3P5YZ
GBM(T=153,N=1157)	Normal	4.1086	GTEX-P44G-0011-R10A-SM-2I3FF
GBM(T=153,N=1157)	Normal	3.7038	GTEX-YFC4-0011-R1a-SM-4V6EH
GBM(T=153,N=1157)	Normal	4.0321	GTEX-131XH-0011-R10a-SM-5EGLJ
GBM(T=153,N=1157)	Normal	4.5674	GTEX-13N2G-0011-R2a-SM-5MR4Q
GBM(T=153,N=1157)	Normal	4.6118	GTEX-1128S-2726-SM-5H12C
GBM(T=153,N=1157)	Normal	3.7719	GTEX-11ZVC-0011-R4a-SM-5BC6Z
GBM(T=153,N=1157)	Normal	3.9495	GTEX-11GSO-0011-R3b-SM-57WB2
GBM(T=153,N=1157)	Normal	6.0794	GTEX-WVLH-2926-SM-3MJG5
GBM(T=153,N=1157)	Normal	3.6159	GTEX-RVPU-0011-R8A-SM-5SI8I
GBM(T=153,N=1157)	Normal	4.0841	GTEX-12ZZX-0011-R3b-SM-5EGLH
GBM(T=153,N=1157)	Normal	3.645	GTEX-1313W-0011-R2a-SM-5EGLF
GBM(T=153,N=1157)	Normal	3.4738	GTEX-13O3Q-0011-R1b-SM-5KM3L
GBM(T=153,N=1157)	Normal	4.9914	GTEX-XLM4-3026-SM-4AT6L
GBM(T=153,N=1157)	Normal	5.48	GTEX-12WSI-0011-R11b-SM-5P9EZ
GBM(T=153,N=1157)	Normal	4.2502	GTEX-N7MS-0011-R4a-SM-2HMKW
GBM(T=153,N=1157)	Normal	5.7754	GTEX-131YS-3026-SM-5EGHY
GBM(T=153,N=1157)	Normal	4.8664	GTEX-13JUV-0011-R1a-SM-5LZY4
GBM(T=153,N=1157)	Normal	4.2126	GTEX-1399T-0011-R2b-SM-5DUXM
GBM(T=153,N=1157)	Normal	4.0409	GTEX-XOTO-0011-R7B-SM-4B64R
GBM(T=153,N=1157)	Normal	3.3263	GTEX-12WSD-0011-R10b-SM-5GU79
GBM(T=153,N=1157)	Normal	4.2195	GTEX-N7MS-0011-R6a-SM-2HMJ4
GBM(T=153,N=1157)	Normal	4.1954	GTEX-13S7M-0011-R5b-SM-5P9HS
GBM(T=153,N=1157)	Normal	3.466	GTEX-12126-0011-R10b-SM-5BC6T
GBM(T=153,N=1157)	Normal	4.8237	GTEX-QVJO-0011-R1A-SM-2S1QI
GBM(T=153,N=1157)	Normal	4.2712	GTEX-XMD1-0011-R2B-SM-4AT5N
GBM(T=153,N=1157)	Normal	5.6383	GTEX-RU72-0011-R11A-SM-2TF6J
GBM(T=153,N=1157)	Normal	3.9864	GTEX-11UD1-0011-R3a-SM-5BC6S
GBM(T=153,N=1157)	Normal	4.4005	GTEX-XOTO-0011-R1B-SM-4B65C
GBM(T=153,N=1157)	Normal	3.9561	GTEX-13O3O-0011-R1b-SM-5KM2K
GBM(T=153,N=1157)	Normal	2.4777	GTEX-14753-0011-R5a-SM-5S2VW
GBM(T=153,N=1157)	Normal	6.6393	GTEX-12WS9-2826-SM-5FQU9
GBM(T=153,N=1157)	Normal	4.2743	GTEX-145LS-0011-R3a-SM-5S2VJ
GBM(T=153,N=1157)	Normal	4.6594	GTEX-R55E-0011-R8A-SM-2TC66
GBM(T=153,N=1157)	Normal	4.5354	GTEX-14BIM-0011-R5b-SM-5S2RM
GBM(T=153,N=1157)	Normal	3.4919	GTEX-ZF28-0011-R7a-SM-4WKF5
GBM(T=153,N=1157)	Normal	3.9269	GTEX-RVPU-0011-R8A-SM-2TF74
GBM(T=153,N=1157)	Normal	4.1827	GTEX-12ZZY-0011-R5a-SM-5EGL9
GBM(T=153,N=1157)	Normal	4.9676	GTEX-RNOR-0011-R9A-SM-2TF52
GBM(T=153,N=1157)	Normal	5.1719	GTEX-NPJ8-1526-SM-26GMH
GBM(T=153,N=1157)	Normal	4.2165	GTEX-13VXU-0011-R6a-SM-5SI71
GBM(T=153,N=1157)	Normal	3.3813	GTEX-NPJ8-1526-SM-26GMY
GBM(T=153,N=1157)	Normal	3.8339	GTEX-12WSF-0011-R3a-SM-5DUW7
GBM(T=153,N=1157)	Normal	3.9345	GTEX-12WSD-0011-R7b-SM-5PNWE
GBM(T=153,N=1157)	Normal	4.4957	GTEX-14BIM-0011-R3b-SM-5S2RL
GBM(T=153,N=1157)	Normal	4.8424	GTEX-13G51-0011-R1a-SM-5LZYR
GBM(T=153,N=1157)	Normal	3.1985	GTEX-13FLW-0011-R1b-SM-5LZX2
GBM(T=153,N=1157)	Normal	5.7079	GTEX-13OW6-0011-R11a-SM-5L3H2
GBM(T=153,N=1157)	Normal	4.9368	GTEX-NPJ8-0011-R6a-SM-2HMKB
GBM(T=153,N=1157)	Normal	3.7452	GTEX-11ZVC-0011-R1b-SM-5BC6M
GBM(T=153,N=1157)	Normal	6.3992	GTEX-WWYW-3026-SM-3NB36
GBM(T=153,N=1157)	Normal	4.4209	GTEX-QMR6-0011-R8A-SM-32PKJ
GBM(T=153,N=1157)	Normal	4.8996	GTEX-13RTJ-0011-R9a-SM-5Q5AY
GBM(T=153,N=1157)	Normal	4.5778	GTEX-13NYS-0011-R1b-SM-5MR55
GBM(T=153,N=1157)	Normal	3.7038	GTEX-OHPN-0011-R8A-SM-33HBT
GBM(T=153,N=1157)	Normal	3.7038	GTEX-13O3Q-0011-R2b-SM-5KM3K
GBM(T=153,N=1157)	Normal	4.9156	GTEX-13X6K-0011-R6a-SM-5P9K6
GBM(T=153,N=1157)	Normal	3.5838	GTEX-Y8DK-0011-R1A-SM-4RGLO
GBM(T=153,N=1157)	Normal	5.6985	GTEX-131YS-0011-R11b-SM-5EGLM
GBM(T=153,N=1157)	Normal	5.1543	GTEX-X4XX-3026-SM-3NMB2
GBM(T=153,N=1157)	Normal	5.7777	GTEX-11ONC-3026-SM-5985W
GBM(T=153,N=1157)	Normal	4.4647	GTEX-13NZA-0011-R9b-SM-5MR5I
GBM(T=153,N=1157)	Normal	3.7517	GTEX-ZVZQ-0011-R3a-SM-57WC7
GBM(T=153,N=1157)	Normal	4.4135	GTEX-14BIN-0011-R9a-SM-5SI76
GBM(T=153,N=1157)	Normal	4.2795	GTEX-139TT-0011-R7b-SM-5J2MN
GBM(T=153,N=1157)	Normal	5.5361	GTEX-11OF3-0011-R11a-SM-57WCR
GBM(T=153,N=1157)	Normal	4.4336	GTEX-145MF-2726-SM-5O995
GBM(T=153,N=1157)	Normal	5.5656	GTEX-13G51-0011-R11b-SM-5J2NE
GBM(T=153,N=1157)	Normal	4.41	GTEX-13O3Q-0011-R5b-SM-5P9H4
GBM(T=153,N=1157)	Normal	3.1522	GTEX-X4XY-0011-R10B-SM-46MWS
GBM(T=153,N=1157)	Normal	3.9241	GTEX-1313W-3126-SM-5LZUI
GBM(T=153,N=1157)	Normal	5.4236	GTEX-13FXS-0011-R11a-SM-5L3DM
GBM(T=153,N=1157)	Normal	4.8435	GTEX-13FHO-0011-R5b-SM-5LZZ3
GBM(T=153,N=1157)	Normal	4.0072	GTEX-1445S-0011-R7b-SM-5PNUG
GBM(T=153,N=1157)	Normal	4.2706	GTEX-RU72-0011-R6A-SM-2TF71
GBM(T=153,N=1157)	Normal	3.8197	GTEX-UTHO-0011-R10A-SM-3GIJQ
GBM(T=153,N=1157)	Normal	3.9801	GTEX-145MH-0011-R8a-SM-5PNUL
GBM(T=153,N=1157)	Normal	4.3957	GTEX-NPJ8-0011-R4a-SM-2HML3
GBM(T=153,N=1157)	Normal	5.6887	GTEX-ZYY3-3126-SM-5SI9L
GBM(T=153,N=1157)	Normal	5.6462	GTEX-139TT-0011-R11b-SM-5LZV1
GBM(T=153,N=1157)	Normal	5.6337	GTEX-145LU-0011-R11b-SM-5P9JX
GBM(T=153,N=1157)	Normal	5.8017	GTEX-13OW7-2926-SM-5MR3Z
GBM(T=153,N=1157)	Normal	4.2795	GTEX-12WSA-2926-SM-5EQ4D
GBM(T=153,N=1157)	Normal	4.0687	GTEX-12WSD-0011-R4b-SM-5LZUA
GBM(T=153,N=1157)	Normal	4.1546	GTEX-13S7M-0011-R9a-SM-5O9DW
GBM(T=153,N=1157)	Normal	4.3406	GTEX-14ASI-0011-R6a-SM-5S2UZ
GBM(T=153,N=1157)	Normal	4.116	GTEX-13OVL-0011-R5b-SM-5L3FU
GBM(T=153,N=1157)	Normal	3.4046	GTEX-1313W-0011-R7b-SM-5DUWL
GBM(T=153,N=1157)	Normal	4.7082	GTEX-144GL-0011-R6a-SM-5P9HW
GBM(T=153,N=1157)	Normal	4.5515	GTEX-R55F-1326-SM-2TF5F
GBM(T=153,N=1157)	Normal	3.4195	GTEX-1477Z-0011-R3b-SM-5PNX9
GBM(T=153,N=1157)	Normal	4.5533	GTEX-13X6I-0011-R8a-SM-5PNZF
GBM(T=153,N=1157)	Normal	6.0287	GTEX-12ZZX-2826-SM-5BC6K
GBM(T=153,N=1157)	Normal	4.6893	TCGA-06-0680-11
GBM(T=153,N=1157)	Normal	3.6276	GTEX-13X6J-0011-R5b-SM-5PNWT
GBM(T=153,N=1157)	Normal	4.6554	GTEX-NPJ8-0011-R1a-SM-5SI8B
GBM(T=153,N=1157)	Normal	5.3208	GTEX-XLM4-0011-R8A-SM-4AT44
GBM(T=153,N=1157)	Normal	4.6241	GTEX-139UW-0011-R9b-SM-5LZYT
GBM(T=153,N=1157)	Normal	5.445	GTEX-13RTJ-0011-R1a-SM-5O9D9
GBM(T=153,N=1157)	Normal	4.0144	GTEX-ZUA1-0011-R5b-SM-51MTG
GBM(T=153,N=1157)	Normal	3.9644	GTEX-11ZUS-2926-SM-5FQSL
GBM(T=153,N=1157)	Normal	4.6246	GTEX-117XS-3026-SM-5N9CA
GBM(T=153,N=1157)	Normal	4.5778	GTEX-13NYS-0011-R5a-SM-5MR4D
GBM(T=153,N=1157)	Normal	6.1158	GTEX-13OVJ-2726-SM-5IJG6
GBM(T=153,N=1157)	Normal	3.8807	GTEX-Z93S-0011-R5b-SM-4RGNI
GBM(T=153,N=1157)	Normal	6.1026	GTEX-QDT8-3026-SM-32PKB
GBM(T=153,N=1157)	Normal	5.3081	GTEX-NPJ8-0011-R3a-SM-2HMIW
GBM(T=153,N=1157)	Normal	3.5521	GTEX-13OVH-0011-R4a-SM-5KM3W
GBM(T=153,N=1157)	Normal	4.8201	GTEX-11ONC-2926-SM-5P9JM
GBM(T=153,N=1157)	Normal	4.8953	GTEX-WWYW-0011-R7A-SM-3NB3H
GBM(T=153,N=1157)	Normal	5.6174	GTEX-RNOR-2226-SM-2TF5O
GBM(T=153,N=1157)	Normal	4.1351	GTEX-WHSE-0011-R3A-SM-3P5ZM
GBM(T=153,N=1157)	Normal	4.5148	GTEX-131XH-0011-R6a-SM-5KM2G
GBM(T=153,N=1157)	Normal	5.0299	GTEX-12WS9-0011-R10a-SM-57WBV
GBM(T=153,N=1157)	Normal	3.6826	GTEX-131YS-0011-R10b-SM-5EQ5N
GBM(T=153,N=1157)	Normal	3.8708	GTEX-13VXU-0011-R3b-SM-5O9CU
GBM(T=153,N=1157)	Normal	4.7214	GTEX-OXRO-0011-R9A-SM-5S2W3
GBM(T=153,N=1157)	Normal	4.0197	GTEX-13X6J-0011-R3b-SM-5P9K5
GBM(T=153,N=1157)	Normal	4.3792	GTEX-11ONC-0011-R8b-SM-5NQ87
GBM(T=153,N=1157)	Normal	5.5549	GTEX-12126-0011-R11a-SM-5BC6X
GBM(T=153,N=1157)	Normal	3.3505	GTEX-RU72-0011-R7A-SM-2TF5U
GBM(T=153,N=1157)	Normal	5.7798	GTEX-11H98-0011-R11b-SM-5NQ6U
GBM(T=153,N=1157)	Normal	5.6008	GTEX-WZTO-0011-R11A-SM-4E3K9
GBM(T=153,N=1157)	Normal	6.4583	GTEX-14BIM-3126-SM-5Q5C7
GBM(T=153,N=1157)	Normal	3.6416	GTEX-ZAB4-0011-R3a-SM-4RGNQ
GBM(T=153,N=1157)	Normal	3.6508	GTEX-13OVL-0011-R8a-SM-5L3HH
GBM(T=153,N=1157)	Normal	4.757	GTEX-14ABY-0011-R9a-SM-5PNZK
GBM(T=153,N=1157)	Normal	4.6159	GTEX-NL4W-0011-R8a-SM-2I3G4
GBM(T=153,N=1157)	Normal	3.9644	GTEX-11GSO-0011-R2a-SM-57WDF
GBM(T=153,N=1157)	Normal	3.4919	GTEX-NL3H-0011-R1a-SM-48TDJ
GBM(T=153,N=1157)	Normal	4.3477	GTEX-X261-0011-R10B-SM-4E3JT
GBM(T=153,N=1157)	Normal	3.5236	GTEX-11ZTS-0011-R3a-SM-5BC78
GBM(T=153,N=1157)	Normal	4.8156	GTEX-XLM4-0011-R6A-SM-4AT4B
GBM(T=153,N=1157)	Normal	5.3316	GTEX-12WSB-0011-R11b-SM-57WBJ
GBM(T=153,N=1157)	Normal	4.7393	GTEX-N7MT-0011-R6a-SM-2I3G3
GBM(T=153,N=1157)	Normal	6.2559	GTEX-T5JC-2326-SM-32PMR
GBM(T=153,N=1157)	Normal	4.204	GTEX-145MH-0011-R5a-SM-5P9JT
GBM(T=153,N=1157)	Normal	5.7936	GTEX-13NZ8-3026-SM-5L3D4
GBM(T=153,N=1157)	Normal	4.6859	GTEX-13OVH-3026-SM-5MR4N
GBM(T=153,N=1157)	Normal	5.6573	GTEX-YJ89-0011-R11a-SM-4SOKA
GBM(T=153,N=1157)	Normal	4.4443	GTEX-13N1W-0011-R10b-SM-5MR4H
GBM(T=153,N=1157)	Normal	6.1941	GTEX-145MI-3126-SM-5Q5CF
GBM(T=153,N=1157)	Normal	4.2055	GTEX-13OW8-0011-R10a-SM-5L3H6
GBM(T=153,N=1157)	Normal	4.0303	GTEX-13OW8-0011-R8a-SM-5L3G5
GBM(T=153,N=1157)	Normal	4.7468	GTEX-QVUS-0011-R8A-SM-3GAD7
GBM(T=153,N=1157)	Normal	3.6053	GTEX-P44H-0011-R4A-SM-2XCEW
GBM(T=153,N=1157)	Normal	3.9837	GTEX-RU72-0011-R2A-SM-2TF6O
GBM(T=153,N=1157)	Normal	4.985	GTEX-X585-0011-R8A-SM-46MUX
GBM(T=153,N=1157)	Normal	3.9991	GTEX-145MH-0011-R3b-SM-5P9JQ
GBM(T=153,N=1157)	Normal	3.3618	GTEX-11ZUS-0011-R8a-SM-5BC73
GBM(T=153,N=1157)	Normal	6.1168	GTEX-NPJ8-2626-SM-2D7W2
GBM(T=153,N=1157)	Normal	4.1747	GTEX-YFC4-0011-R4a-SM-4RGLQ
GBM(T=153,N=1157)	Normal	4.2517	GTEX-13NZA-0011-R8b-SM-5KM2Q
GBM(T=153,N=1157)	Normal	4.2965	GTEX-Y8DK-0011-R5B-SM-4RTW6
GBM(T=153,N=1157)	Normal	3.8125	GTEX-11ZTS-0011-R1a-SM-5BC71
GBM(T=153,N=1157)	Normal	4.8022	GTEX-YJ89-0011-R9a-SM-4SOK7
GBM(T=153,N=1157)	Normal	3.9699	GTEX-139TU-0011-R5b-SM-5L3E1
GBM(T=153,N=1157)	Normal	5.7806	GTEX-NL3H-0011-R11A-SM-2I3E6
GBM(T=153,N=1157)	Normal	4.116	GTEX-N7MS-0011-R2a-SM-2HML6
GBM(T=153,N=1157)	Normal	2.7718	GTEX-13FTY-0011-R1a-SM-5LZXE
GBM(T=153,N=1157)	Normal	4.3169	GTEX-12WSF-0011-R4b-SM-5HL88
GBM(T=153,N=1157)	Normal	4.3327	GTEX-11ZTS-0011-R2b-SM-5BC75
GBM(T=153,N=1157)	Normal	5.8329	GTEX-T5JC-0011-R11A-SM-32PMB
GBM(T=153,N=1157)	Normal	4.5723	GTEX-1399T-3026-SM-5KLZC
GBM(T=153,N=1157)	Normal	4.2016	GTEX-12WS9-0011-R2a-SM-5CVNE
GBM(T=153,N=1157)	Normal	3.5825	GTEX-139T8-0011-R1a-SM-5HL75
GBM(T=153,N=1157)	Normal	4.9964	GTEX-X4XX-0011-R4B-SM-46MWL
GBM(T=153,N=1157)	Normal	3.2095	GTEX-NPJ8-2626-SM-26GMZ
GBM(T=153,N=1157)	Normal	4.1842	GTEX-T5JC-2426-SM-3NMDB
GBM(T=153,N=1157)	Normal	5.1214	GTEX-11ZUS-0011-R11b-SM-5BC7B
GBM(T=153,N=1157)	Normal	6.1843	GTEX-13RTJ-3126-SM-5S2Q4
GBM(T=153,N=1157)	Normal	4.6926	GTEX-13CZV-0011-R9a-SM-5LZXT
GBM(T=153,N=1157)	Normal	3.6735	GTEX-13CZV-0011-R5a-SM-5K7XA
GBM(T=153,N=1157)	Normal	4.7814	GTEX-13OW6-0011-R5a-SM-5O9BK
GBM(T=153,N=1157)	Normal	3.7645	GTEX-12WSM-0011-R6b-SM-5EQ6N
GBM(T=153,N=1157)	Normal	4.7377	GTEX-13N1W-0011-R5b-SM-5MR5Q
GBM(T=153,N=1157)	Normal	4.8555	GTEX-ZZPT-3026-SM-5GZXH
GBM(T=153,N=1157)	Normal	4.3709	GTEX-12ZZY-0011-R6b-SM-5EGLA
GBM(T=153,N=1157)	Normal	4.7457	GTEX-145MI-0011-R4b-SM-5PNZH
GBM(T=153,N=1157)	Normal	5.2972	GTEX-13QIC-0011-R11b-SM-5O9BU
GBM(T=153,N=1157)	Normal	4.3298	GTEX-WVLH-0011-R1A-SM-4MVOK
GBM(T=153,N=1157)	Normal	4.9345	GTEX-13OVJ-0011-R5a-SM-5P9H7
GBM(T=153,N=1157)	Normal	4.6588	GTEX-11GSP-3226-SM-5986O
GBM(T=153,N=1157)	Normal	4.7829	GTEX-13NYS-0011-R8a-SM-5MR5H
GBM(T=153,N=1157)	Normal	4.7666	GTEX-13OW6-3026-SM-5J2MI
GBM(T=153,N=1157)	Normal	3.1243	GTEX-ZE7O-0011-R7a-SM-57WCU
GBM(T=153,N=1157)	Normal	4.0764	GTEX-ZUA1-0011-R3a-SM-4YCEE
GBM(T=153,N=1157)	Normal	4.6707	GTEX-XMD1-0011-R6A-SM-4AT5K
GBM(T=153,N=1157)	Normal	4.4389	GTEX-13X6K-0011-R10a-SM-5P9JR
GBM(T=153,N=1157)	Normal	3.1227	GTEX-ZF28-0011-R1a-SM-4WWD1
GBM(T=153,N=1157)	Normal	4.582	GTEX-ZF28-0011-R6a-SM-4WKHI
GBM(T=153,N=1157)	Normal	4.4647	GTEX-131XH-0011-R2b-SM-5DUVY
GBM(T=153,N=1157)	Normal	5.8339	GTEX-13RTJ-0011-R11a-SM-5O9CK
GBM(T=153,N=1157)	Normal	4.8299	GTEX-13OW5-0011-R4b-SM-5L3HS
GBM(T=153,N=1157)	Normal	4.5329	GTEX-RVPV-0011-R5A-SM-2TF69
GBM(T=153,N=1157)	Normal	3.9727	GTEX-12WSF-0011-R7b-SM-5HL99
GBM(T=153,N=1157)	Normal	4.5361	GTEX-WZTO-0011-R1B-SM-3NMAR
GBM(T=153,N=1157)	Normal	4.2957	GTEX-WL46-0011-R1A-SM-3LK6M
GBM(T=153,N=1157)	Normal	6.2331	GTEX-UTHO-2926-SM-3P5Z9
GBM(T=153,N=1157)	Normal	3.847	GTEX-12WSE-0011-R1b-SM-5GU4V
GBM(T=153,N=1157)	Normal	4.1675	GTEX-ZE9C-0011-R6a-SM-4WWCW
GBM(T=153,N=1157)	Normal	3.1293	GTEX-144GL-0011-R1a-SM-5PNZ5
GBM(T=153,N=1157)	Normal	4.4189	GTEX-13O3Q-0011-R8b-SM-5KM2J
GBM(T=153,N=1157)	Normal	4.2563	GTEX-PWO3-0011-R2A-SM-2S1OX
GBM(T=153,N=1157)	Normal	6.119	GTEX-12ZZY-2926-SM-5DUXO
GBM(T=153,N=1157)	Normal	4.528	GTEX-11OF3-3126-SM-5GU5E
GBM(T=153,N=1157)	Normal	4.0452	GTEX-Z93S-0011-R6b-SM-4RGNJ
GBM(T=153,N=1157)	Normal	3.5261	GTEX-139UC-0011-R11a-SM-5KM3J
GBM(T=153,N=1157)	Normal	4.0755	GTEX-13G51-0011-R2b-SM-5LZXS
GBM(T=153,N=1157)	Normal	4.1169	GTEX-YJ89-0011-R6a-SM-4V6GN
GBM(T=153,N=1157)	Normal	5.5777	GTEX-ZDXO-0011-R11a-SM-4WWD9
GBM(T=153,N=1157)	Normal	4.9795	GTEX-14BIL-0011-R9a-SM-5SI7A
GBM(T=153,N=1157)	Normal	3.228	GTEX-Z93S-0011-R2a-SM-4RGNG
GBM(T=153,N=1157)	Normal	4.6633	GTEX-12ZZZ-0011-R5a-SM-5EQ4M
GBM(T=153,N=1157)	Normal	3.8227	GTEX-13OW8-0011-R7a-SM-5L3FP
GBM(T=153,N=1157)	Normal	3.4289	GTEX-13FHP-0011-R6b-SM-5LZY6
GBM(T=153,N=1157)	Normal	5.5589	GTEX-13S7M-0011-R11b-SM-5P9HU
GBM(T=153,N=1157)	Normal	4.1367	GTEX-TSE9-3026-SM-3DB76
GBM(T=153,N=1157)	Normal	4.3701	GTEX-12WSC-3026-SM-5GCNF
GBM(T=153,N=1157)	Normal	3.9809	GTEX-QVUS-0011-R4A-SM-3GAE7
GBM(T=153,N=1157)	Normal	3.8629	GTEX-11UD1-0011-R5b-SM-5P9FP
GBM(T=153,N=1157)	Normal	4.211	GTEX-13FLW-1426-SM-5K7YE
GBM(T=153,N=1157)	Normal	3.855	GTEX-13JVG-0011-R7b-SM-5MR3Q
GBM(T=153,N=1157)	Normal	4.3111	GTEX-145MH-0011-R7a-SM-5PNWH
GBM(T=153,N=1157)	Normal	2.8379	GTEX-139TS-0011-R7a-SM-5K7X7
GBM(T=153,N=1157)	Normal	3.4944	GTEX-ZVZQ-0011-R1a-SM-57WBU
GBM(T=153,N=1157)	Normal	4.1867	GTEX-QMR6-0011-R10A-SM-32PKO
GBM(T=153,N=1157)	Normal	5.3526	GTEX-WL46-0011-R11A-SM-3MJFT
GBM(T=153,N=1157)	Normal	4.847	GTEX-12WSD-0011-R6b-SM-5P9JU
GBM(T=153,N=1157)	Normal	3.6485	GTEX-13X6J-0011-R4b-SM-5P9K4
GBM(T=153,N=1157)	Normal	5.6901	GTEX-11GSP-0011-R11b-SM-5NQ7V
GBM(T=153,N=1157)	Normal	7.913	GTEX-X4EP-0011-R4B-SM-3P627
GBM(T=153,N=1157)	Normal	4.204	GTEX-WVLH-0011-R10A-SM-3MJFM
GBM(T=153,N=1157)	Normal	4.368	GTEX-Q2AG-0011-R1A-SM-2HMJI
GBM(T=153,N=1157)	Normal	5.938	GTEX-X261-3126-SM-4PQZC
GBM(T=153,N=1157)	Normal	3.7345	GTEX-Z93S-2926-SM-57WB9
GBM(T=153,N=1157)	Normal	5.0268	GTEX-13OVJ-0011-R6b-SM-5L3GH
GBM(T=153,N=1157)	Normal	4.1811	GTEX-13IVO-0011-R10a-SM-5LZY3
GBM(T=153,N=1157)	Normal	6.3586	GTEX-11DZ1-2926-SM-5A5KI
GBM(T=153,N=1157)	Normal	4.5951	GTEX-13X6I-0011-R7b-SM-5PNWP
GBM(T=153,N=1157)	Normal	4.1009	GTEX-RVPU-0011-R9A-SM-3NM8E
GBM(T=153,N=1157)	Normal	4.0027	GTEX-13NZA-0011-R1b-SM-5LUAF
GBM(T=153,N=1157)	Normal	3.0669	GTEX-13NZA-0011-R5b-SM-5KM4K
GBM(T=153,N=1157)	Normal	6.0639	GTEX-13OVH-2926-SM-5IJFH
GBM(T=153,N=1157)	Normal	4.5717	GTEX-P44H-0011-R1A-SM-3NM8J
GBM(T=153,N=1157)	Normal	3.9764	GTEX-13CIG-0011-R5b-SM-5L3F2
GBM(T=153,N=1157)	Normal	6.312	GTEX-13OW5-0011-R11b-SM-5L3GG
GBM(T=153,N=1157)	Normal	3.9335	GTEX-13JVG-0011-R6a-SM-5MR3E
GBM(T=153,N=1157)	Normal	3.516	GTEX-11ZU8-0011-R3a-SM-5BC6U
GBM(T=153,N=1157)	Normal	4.5404	GTEX-132Q8-0011-R2b-SM-5EQ5Z
GBM(T=153,N=1157)	Normal	6.356	GTEX-YFC4-3026-SM-5IFJK
GBM(T=153,N=1157)	Normal	5.6256	GTEX-145MH-2926-SM-5Q5D2
GBM(T=153,N=1157)	Normal	4.3618	GTEX-13JUV-0011-R6b-SM-5LZYG
GBM(T=153,N=1157)	Normal	4.3399	GTEX-T6MN-0011-R5A-SM-32QPD
GBM(T=153,N=1157)	Normal	3.2675	GTEX-139TT-0011-R3b-SM-5K7VL
GBM(T=153,N=1157)	Normal	5.5774	GTEX-13CF2-0011-R11b-SM-5LZXO
GBM(T=153,N=1157)	Normal	4.3771	GTEX-144GL-3026-SM-5Q5CW
GBM(T=153,N=1157)	Normal	4.5614	GTEX-QDT8-2926-SM-32PKC
GBM(T=153,N=1157)	Normal	3.9097	GTEX-11NV4-0011-R7a-SM-57WDH
GBM(T=153,N=1157)	Normal	4.2517	GTEX-14ASI-0011-R1b-SM-5S2TY
GBM(T=153,N=1157)	Normal	6.0924	GTEX-ZAB4-0011-R11a-SM-4SOKI
GBM(T=153,N=1157)	Normal	6.1444	GTEX-WZTO-2826-SM-3NM8P
GBM(T=153,N=1157)	Normal	4.6831	GTEX-XLM4-0011-R2B-SM-4AT5Z
GBM(T=153,N=1157)	Normal	5.31	GTEX-QDT8-0011-R9A-SM-32PKH
GBM(T=153,N=1157)	Normal	6.2275	GTEX-ZYFD-2926-SM-5GID9
GBM(T=153,N=1157)	Normal	5.5242	GTEX-X585-0011-R4B-SM-46MVH
GBM(T=153,N=1157)	Normal	4.4229	GTEX-QMR6-0011-R6A-SM-32PKP
GBM(T=153,N=1157)	Normal	3.3491	GTEX-13112-0011-R1b-SM-5HL7K
GBM(T=153,N=1157)	Normal	3.2869	GTEX-Z93S-0011-R3b-SM-4RGNH
GBM(T=153,N=1157)	Normal	4.1359	GTEX-T5JC-0011-R10A-SM-32PM2
GBM(T=153,N=1157)	Normal	5.3789	GTEX-X585-0011-R2B-SM-46MVF
GBM(T=153,N=1157)	Normal	3.706	GTEX-WL46-0011-R3A-SM-3TW8E
GBM(T=153,N=1157)	Normal	4.2327	GTEX-13X6I-0011-R1b-SM-5PNZC
GBM(T=153,N=1157)	Normal	4.4282	GTEX-R55E-0011-R5A-SM-2TC5N
GBM(T=153,N=1157)	Normal	4.2288	GTEX-WVLH-3026-SM-3MJG9
GBM(T=153,N=1157)	Normal	4.408	GTEX-13OW5-0011-R5b-SM-5L3FR
GBM(T=153,N=1157)	Normal	4.2211	GTEX-Y8DK-0826-SM-4TT3T
GBM(T=153,N=1157)	Normal	5.4591	GTEX-ZUA1-0011-R11b-SM-51MTI
GBM(T=153,N=1157)	Normal	3.3771	GTEX-13CF2-0011-R1a-SM-5LZY1
GBM(T=153,N=1157)	Normal	5.9361	GTEX-12WSH-3126-SM-5LZW8
GBM(T=153,N=1157)	Normal	5.3729	GTEX-12696-3026-SM-5FQTU
GBM(T=153,N=1157)	Normal	4.7109	GTEX-WL46-0011-R6A-SM-3LK6X
GBM(T=153,N=1157)	Normal	5.4633	GTEX-139UC-0011-R9a-SM-5K7W7
GBM(T=153,N=1157)	Normal	3.849	GTEX-N7MS-0011-R10A-SM-2HMJK
GBM(T=153,N=1157)	Normal	5.634	GTEX-13SLX-0011-R11b-SM-5O9C8
GBM(T=153,N=1157)	Normal	4.2258	GTEX-147GR-0011-R2b-SM-5S2RQ
GBM(T=153,N=1157)	Normal	4.5754	GTEX-145MG-3026-SM-5RQJA
GBM(T=153,N=1157)	Normal	5.7746	GTEX-13O3O-0011-R11b-SM-5KM4G
GBM(T=153,N=1157)	Normal	4.1875	GTEX-YFC4-0011-R5a-SM-4RGLR
GBM(T=153,N=1157)	Normal	4.3312	GTEX-13PVQ-0011-R9b-SM-5LU3B
GBM(T=153,N=1157)	Normal	3.254	GTEX-12WSD-0011-R2a-SM-5LZWB
GBM(T=153,N=1157)	Normal	4.1683	GTEX-12WSB-0011-R1b-SM-5P9EY
GBM(T=153,N=1157)	Normal	3.4046	GTEX-12ZZW-0011-R4a-SM-5DUX9
GBM(T=153,N=1157)	Normal	4.3498	GTEX-ZE7O-0011-R5a-SM-57WBO
GBM(T=153,N=1157)	Normal	4.3861	GTEX-WZTO-0011-R3B-SM-3NMC6
GBM(T=153,N=1157)	Normal	3.9955	GTEX-13VXU-0011-R4b-SM-5O9CI
GBM(T=153,N=1157)	Normal	6.1898	GTEX-11EQ8-2826-SM-5N9C1
GBM(T=153,N=1157)	Normal	5.6999	GTEX-QVUS-2926-SM-3GIJB
GBM(T=153,N=1157)	Normal	4.2449	GTEX-P44H-0011-R3A-SM-2XCEQ
GBM(T=153,N=1157)	Normal	4.0755	GTEX-WVLH-0011-R4A-SM-3MJFS
GBM(T=153,N=1157)	Normal	4.5522	GTEX-XOTO-3026-SM-4B65M
GBM(T=153,N=1157)	Normal	3.9982	GTEX-13SLW-0011-R3b-SM-5SI6Y
GBM(T=153,N=1157)	Normal	4.4673	GTEX-13JVG-0011-R5a-SM-5MR4O
GBM(T=153,N=1157)	Normal	4.7872	GTEX-111FC-3126-SM-5GZZ2
GBM(T=153,N=1157)	Normal	5.0413	GTEX-1117F-3226-SM-5N9CT
GBM(T=153,N=1157)	Normal	3.6288	GTEX-13JUV-0011-R7b-SM-5LZZG
GBM(T=153,N=1157)	Normal	2.9763	GTEX-145MI-0011-R5a-SM-5Q5B4
GBM(T=153,N=1157)	Normal	6.0807	GTEX-13JVG-3226-SM-5IJGJ
GBM(T=153,N=1157)	Normal	5.6274	GTEX-WHSE-0011-R11A-SM-3P5YY
GBM(T=153,N=1157)	Normal	5.0161	GTEX-13JVG-0011-R8a-SM-5KM3E
GBM(T=153,N=1157)	Normal	4.861	GTEX-QDT8-0011-R9A-SM-5SI8J
GBM(T=153,N=1157)	Normal	4.5503	GTEX-13OW5-0011-R6b-SM-5O9BW
GBM(T=153,N=1157)	Normal	4.857	GTEX-OXRO-0011-R9A-SM-3NB1X
GBM(T=153,N=1157)	Normal	4.4196	GTEX-RNOR-2326-SM-2TF4I
GBM(T=153,N=1157)	Normal	5.8455	GTEX-WL46-2826-SM-3LK81
GBM(T=153,N=1157)	Normal	3.1985	GTEX-YJ89-0011-R1a-SM-4RGLS
GBM(T=153,N=1157)	Normal	4.254	GTEX-13NYB-0011-R6b-SM-5MR51
GBM(T=153,N=1157)	Normal	3.8084	GTEX-11WQK-0011-R8a-SM-5BC7C
GBM(T=153,N=1157)	Normal	4.1285	GTEX-WL46-0011-R2A-SM-3LK6O
GBM(T=153,N=1157)	Normal	4.7629	GTEX-RU72-0011-R8A-SM-2TF61
GBM(T=153,N=1157)	Normal	5.5916	GTEX-13N2G-0011-R11a-SM-5MR3F
GBM(T=153,N=1157)	Normal	4.228	GTEX-ZVZQ-0011-R6b-SM-57WAY
GBM(T=153,N=1157)	Normal	3.8248	GTEX-ZVT3-0011-R5a-SM-51MSI
GBM(T=153,N=1157)	Normal	5.9828	GTEX-12ZZZ-3126-SM-5LZU6
GBM(T=153,N=1157)	Normal	2.8074	GTEX-RVPU-0011-R4A-SM-5SI8K
GBM(T=153,N=1157)	Normal	3.6065	GTEX-13NZA-0011-R10b-SM-5KM54
GBM(T=153,N=1157)	Normal	5.3078	GTEX-XMD1-0011-R5A-SM-4AT47
GBM(T=153,N=1157)	Normal	4.1803	GTEX-14ABY-0011-R6a-SM-5PNWR
GBM(T=153,N=1157)	Normal	4.9174	GTEX-WWYW-0011-R10A-SM-3NB35
GBM(T=153,N=1157)	Normal	4.7328	GTEX-T6MN-0011-R2A-SM-32QOW
GBM(T=153,N=1157)	Normal	4.951	GTEX-NL4W-0011-R11A-SM-2I3DW
GBM(T=153,N=1157)	Normal	3.3205	GTEX-1313W-0011-R3a-SM-5EGLI
GBM(T=153,N=1157)	Normal	4.1433	GTEX-13VXU-0011-R5a-SM-5O9D7
GBM(T=153,N=1157)	Normal	4.3778	GTEX-12WSD-0011-R1b-SM-5LZVY
GBM(T=153,N=1157)	Normal	4.2883	GTEX-P44H-0011-R3A-SM-5SI8A
GBM(T=153,N=1157)	Normal	3.8299	GTEX-TSE9-0011-R10A-SM-3DB7O
GBM(T=153,N=1157)	Normal	3.8053	GTEX-1445S-0011-R6b-SM-5PNUF
GBM(T=153,N=1157)	Normal	3.3363	GTEX-ZV68-0011-R2a-SM-4YCDK
GBM(T=153,N=1157)	Normal	4.2064	GTEX-XLM4-0011-R9A-SM-4AT45
GBM(T=153,N=1157)	Normal	5.7724	GTEX-13JUV-0011-R11a-SM-5LZYH
GBM(T=153,N=1157)	Normal	3.5336	GTEX-S7PM-0011-R5A-SM-3NM8G
GBM(T=153,N=1157)	Normal	3.9745	GTEX-13FXS-0011-R1a-SM-5K7U6
GBM(T=153,N=1157)	Normal	5.5351	GTEX-144GL-0011-R11b-SM-5P9F6
GBM(T=153,N=1157)	Normal	5.5894	GTEX-X4XX-0011-R5A-SM-46MWN
GBM(T=153,N=1157)	Normal	4.144	GTEX-145LU-0011-R9b-SM-5SI66
GBM(T=153,N=1157)	Normal	4.1177	GTEX-13OW6-0011-R2a-SM-5L3HG
GBM(T=153,N=1157)	Normal	5.888	GTEX-14DAQ-3026-SM-5S2QZ
GBM(T=153,N=1157)	Normal	4.6176	GTEX-13FHO-0011-R1b-SM-5KLZG
GBM(T=153,N=1157)	Normal	4.504	GTEX-13N1W-0011-R4a-SM-5MR52
GBM(T=153,N=1157)	Normal	6.7463	GTEX-X4EP-0011-R1A-SM-3P624
GBM(T=153,N=1157)	Normal	3.4555	GTEX-12WS9-0011-R4b-SM-5P9EU
GBM(T=153,N=1157)	Normal	3.9837	GTEX-13RTJ-0011-R10b-SM-5O9CW
GBM(T=153,N=1157)	Normal	3.511	GTEX-13S7M-0011-R6b-SM-5O9D8
GBM(T=153,N=1157)	Normal	4.5008	GTEX-13O3O-0011-R6b-SM-5P9GY
GBM(T=153,N=1157)	Normal	4.8629	GTEX-12WSH-0011-R9b-SM-5LZUG
GBM(T=153,N=1157)	Normal	4.5844	GTEX-12126-1026-SM-5P9JJ
GBM(T=153,N=1157)	Normal	4.678	GTEX-WWYW-3126-SM-3NB39
GBM(T=153,N=1157)	Normal	3.332	GTEX-13CF2-0011-R5a-SM-5LZWS
GBM(T=153,N=1157)	Normal	4.669	GTEX-13VXU-2926-SM-5LU5C
GBM(T=153,N=1157)	Normal	4.5236	GTEX-ZAB4-0011-R8b-SM-4SOKF
GBM(T=153,N=1157)	Normal	4.5027	GTEX-13NYB-3026-SM-5IJD7
GBM(T=153,N=1157)	Normal	4.8161	GTEX-13CIG-0011-R8b-SM-5LZX5
GBM(T=153,N=1157)	Normal	4.4509	GTEX-UTHO-0011-R5A-SM-3GIJD
GBM(T=153,N=1157)	Normal	4.4601	GTEX-13O3O-0011-R8b-SM-5LUAL
GBM(T=153,N=1157)	Normal	4.957	GTEX-X4XX-0011-R3B-SM-46MWK
GBM(T=153,N=1157)	Normal	4.6358	GTEX-NPJ7-0011-R2a-SM-2I3GF
GBM(T=153,N=1157)	Normal	4.2	GTEX-ZE9C-0011-R3a-SM-4WKGT
GBM(T=153,N=1157)	Normal	3.7115	GTEX-13QJC-0011-R8b-SM-5S2U6
GBM(T=153,N=1157)	Normal	4.0233	GTEX-12WS9-0011-R3a-SM-5CVNF
GBM(T=153,N=1157)	Normal	4.4654	GTEX-ZUA1-0011-R6b-SM-4YCDD
GBM(T=153,N=1157)	Normal	4.7301	GTEX-13PVQ-0011-R7a-SM-5L3G3
GBM(T=153,N=1157)	Normal	4.5975	GTEX-13NYS-0011-R3b-SM-5MR41
GBM(T=153,N=1157)	Normal	4.3176	GTEX-13X6K-0011-R7b-SM-5P9K7
GBM(T=153,N=1157)	Normal	4.4686	GTEX-1399T-0011-R5b-SM-5IJDK
GBM(T=153,N=1157)	Normal	4.2156	GTEX-145MH-3026-SM-5Q5DZ
GBM(T=153,N=1157)	Normal	3.61	GTEX-Y8DK-0011-R10A-SM-4SOK1
GBM(T=153,N=1157)	Normal	4.1086	GTEX-13OW8-0011-R1a-SM-5L3HI
GBM(T=153,N=1157)	Normal	2.2839	GTEX-14753-0011-R6b-SM-5S2UD
GBM(T=153,N=1157)	Normal	4.4835	GTEX-13X6K-0011-R5b-SM-5PNUE
GBM(T=153,N=1157)	Normal	3.6041	GTEX-NL3H-0011-R7a-SM-2I3G5
GBM(T=153,N=1157)	Normal	4.4389	GTEX-ZDXO-0011-R5a-SM-4WKG5
GBM(T=153,N=1157)	Normal	7.6255	GTEX-X4EP-0011-R3A-SM-3P626
GBM(T=153,N=1157)	Normal	4.9773	GTEX-13N2G-0011-R3b-SM-5MR5G
GBM(T=153,N=1157)	Normal	3.9718	GTEX-T2IS-3026-SM-32QPM
GBM(T=153,N=1157)	Normal	4.2517	GTEX-14BIN-0011-R6a-SM-5S2RH
GBM(T=153,N=1157)	Normal	4.1086	GTEX-13OVH-0011-R3a-SM-5KM49
GBM(T=153,N=1157)	Normal	4.1052	GTEX-P44G-0011-R4A-SM-2I3FB
GBM(T=153,N=1157)	Normal	3.7005	GTEX-13PDP-0011-R6b-SM-5O9D5
GBM(T=153,N=1157)	Normal	4.6135	GTEX-NPJ8-0011-R1a-SM-2HMLC
GBM(T=153,N=1157)	Normal	4.0134	GTEX-N7MS-0011-R7a-SM-2HMKN
GBM(T=153,N=1157)	Normal	4.2211	GTEX-13SLW-0011-R2b-SM-5O9C6
GBM(T=153,N=1157)	Normal	6.2124	GTEX-ZAJG-3026-SM-5HL92
GBM(T=153,N=1157)	Normal	5.2612	GTEX-WHSE-0011-R5A-SM-3P5ZO
GBM(T=153,N=1157)	Normal	4.1384	GTEX-11ZUS-0011-R9b-SM-5BC76
GBM(T=153,N=1157)	Normal	5.7203	GTEX-RU72-2926-SM-2TF66
GBM(T=153,N=1157)	Normal	4.2601	GTEX-Q2AG-0011-R6A-SM-2HML7
GBM(T=153,N=1157)	Normal	5.5717	GTEX-11EI6-2926-SM-5985U
GBM(T=153,N=1157)	Normal	3.5447	GTEX-R55F-0011-R5A-SM-2TF5L
GBM(T=153,N=1157)	Normal	3.9097	GTEX-13FXS-0011-R10a-SM-5J2MA
GBM(T=153,N=1157)	Normal	3.7782	GTEX-13O3Q-0011-R4a-SM-5P9H2
GBM(T=153,N=1157)	Normal	6.2439	GTEX-132Q8-2926-SM-5IFFP
GBM(T=153,N=1157)	Normal	4.3399	GTEX-NL3H-0011-R5a-SM-2I3GB
GBM(T=153,N=1157)	Normal	5.8671	GTEX-1399T-0011-R11a-SM-5J2O1
GBM(T=153,N=1157)	Normal	5.8902	GTEX-ZAB4-2926-SM-57WCV
GBM(T=153,N=1157)	Normal	4.7724	GTEX-13N1W-0011-R9b-SM-5MR4R
GBM(T=153,N=1157)	Normal	4.3653	GTEX-13OVL-0011-R9a-SM-5P9GX
GBM(T=153,N=1157)	Normal	4.2434	GTEX-13FXS-0011-R8a-SM-5J1MN
GBM(T=153,N=1157)	Normal	5.2064	GTEX-ZAB4-0011-R9a-SM-4SOKG
GBM(T=153,N=1157)	Normal	4.3674	GTEX-S7SE-0011-R2A-SM-2XCDC
GBM(T=153,N=1157)	Normal	3.8289	GTEX-139TT-0011-R1a-SM-5LZVD
GBM(T=153,N=1157)	Normal	5.6639	GTEX-12696-2926-SM-5FQTG
GBM(T=153,N=1157)	Normal	4.5248	GTEX-N7MT-0011-R10A-SM-2I3E1
GBM(T=153,N=1157)	Normal	4.2935	GTEX-13NYS-0011-R10a-SM-5MR4S
GBM(T=153,N=1157)	Normal	3.9069	GTEX-11NV4-0011-R5a-SM-5NQ88
GBM(T=153,N=1157)	Normal	3.6656	GTEX-13CF2-0011-R3b-SM-5LZZ6
GBM(T=153,N=1157)	Normal	3.856	GTEX-ZVZQ-0011-R4b-SM-57WCZ
GBM(T=153,N=1157)	Normal	4.3624	GTEX-13RTJ-0011-R4b-SM-5PNX1
GBM(T=153,N=1157)	Normal	6.7166	GTEX-13NYS-0011-R11b-SM-5MR4P
GBM(T=153,N=1157)	Normal	4.1851	GTEX-T6MN-0011-R10A-SM-32QP7
GBM(T=153,N=1157)	Normal	3.9364	GTEX-NPJ8-0011-R1a-SM-33HCB
GBM(T=153,N=1157)	Normal	4.4996	GTEX-13SLW-0011-R4b-SM-5S2W2
GBM(T=153,N=1157)	Normal	3.9088	GTEX-PVOW-2526-SM-2XCF7
GBM(T=153,N=1157)	Normal	4.6865	GTEX-OHPN-0011-R10A-SM-5S2U3
GBM(T=153,N=1157)	Normal	3.841	GTEX-13FHP-0011-R5b-SM-5LZY2
GBM(T=153,N=1157)	Normal	4.3764	GTEX-139T8-0011-R3b-SM-5HL4R
GBM(T=153,N=1157)	Normal	5.699	GTEX-ZE7O-0011-R11a-SM-57WBC
GBM(T=153,N=1157)	Normal	4.6916	GTEX-N7MT-0011-R11A-SM-2I3DZ
GBM(T=153,N=1157)	Normal	4.5416	GTEX-NL4W-0011-R5a-SM-2I3GD
GBM(T=153,N=1157)	Normal	3.5298	GTEX-147GR-0011-R10b-SM-5S2UM
GBM(T=153,N=1157)	Normal	3.7677	GTEX-ZVZQ-0011-R8a-SM-51MR5
GBM(T=153,N=1157)	Normal	4.4443	GTEX-13CIG-0011-R3b-SM-5K7XF
GBM(T=153,N=1157)	Normal	4.266	GTEX-13SLX-0011-R5a-SM-5O9BV
GBM(T=153,N=1157)	Normal	4.0866	GTEX-13PVQ-0011-R5b-SM-5O9DI
GBM(T=153,N=1157)	Normal	5.5176	GTEX-RU72-0011-R11A-SM-5SI8G
GBM(T=153,N=1157)	Normal	4.4502	GTEX-S7SE-0011-R6A-SM-2XCD9
GBM(T=153,N=1157)	Normal	3.7908	GTEX-12WSA-0011-R4a-SM-57WB7
GBM(T=153,N=1157)	Normal	3.6622	GTEX-12WSH-0011-R1a-SM-5GU5V
GBM(T=153,N=1157)	Normal	5.6636	GTEX-145MI-0011-R11a-SM-5P9JZ
GBM(T=153,N=1157)	Normal	4.5699	GTEX-12WSF-0011-R5a-SM-5HL8K
GBM(T=153,N=1157)	Normal	4.0063	GTEX-PVOW-0011-R3A-SM-32PKX
GBM(T=153,N=1157)	Normal	4.7965	GTEX-145LS-3126-SM-5Q5BY
GBM(T=153,N=1157)	Normal	4.7355	GTEX-QVJO-0011-R6A-SM-2S1QN
GBM(T=153,N=1157)	Normal	5.1835	GTEX-145LS-0011-R8b-SM-5PNXA
GBM(T=153,N=1157)	Normal	5.904	GTEX-13OW8-2926-SM-5L3FV
GBM(T=153,N=1157)	Normal	3.0756	GTEX-ZVT3-0011-R7a-SM-57WCO
GBM(T=153,N=1157)	Normal	3.846	GTEX-QMR6-0011-R4A-SM-32PKU
GBM(T=153,N=1157)	Normal	4.9425	GTEX-P44H-0011-R6A-SM-2XCF3
GBM(T=153,N=1157)	Normal	3.853	GTEX-P44G-0011-R7A-SM-2I3F9
GBM(T=153,N=1157)	Normal	4.0687	GTEX-R55F-0011-R6A-SM-2TF4L
GBM(T=153,N=1157)	Normal	4.2935	GTEX-YJ89-0011-R8b-SM-4SOK8
GBM(T=153,N=1157)	Normal	3.7366	GTEX-TSE9-0011-R1A-SM-3DB7E
GBM(T=153,N=1157)	Normal	3.5261	GTEX-12ZZW-0011-R6a-SM-5DUVZ
GBM(T=153,N=1157)	Normal	3.9616	GTEX-N7MS-0011-R1a-SM-2HMJG
GBM(T=153,N=1157)	Normal	4.0583	GTEX-Q2AG-0011-R3A-SM-2HMJ9
GBM(T=153,N=1157)	Normal	0	GTEX-T6MN-0011-R6A-SM-5CHQD
GBM(T=153,N=1157)	Normal	5.8528	GTEX-12WSB-3026-SM-59HKM
GBM(T=153,N=1157)	Normal	5.839	GTEX-Z93S-2826-SM-57WBL
GBM(T=153,N=1157)	Normal	4.7026	GTEX-ZE9C-3026-SM-4WKHB
GBM(T=153,N=1157)	Normal	4.121	GTEX-ZF28-0011-R3a-SM-4WWDA
GBM(T=153,N=1157)	Normal	4.5723	GTEX-13SLX-0011-R6a-SM-5PNX4
GBM(T=153,N=1157)	Normal	4.1882	GTEX-13N1W-0011-R3a-SM-5MR5E
GBM(T=153,N=1157)	Normal	4.218	GTEX-XOTO-0011-R3A-SM-4B64W
GBM(T=153,N=1157)	Normal	3.7623	GTEX-ZV68-0011-R10a-SM-51MT7
GBM(T=153,N=1157)	Normal	3.6713	GTEX-13SLX-0011-R4a-SM-5O9BJ
GBM(T=153,N=1157)	Normal	3.7377	GTEX-147F4-0011-R10b-SM-5S2WC
GBM(T=153,N=1157)	Normal	4.1977	GTEX-WZTO-0011-R7B-SM-4E3IS
GBM(T=153,N=1157)	Normal	4.6926	GTEX-WHSE-3026-SM-3P5ZH
GBM(T=153,N=1157)	Normal	3.8748	GTEX-WZTO-0011-R10B-SM-4E3KB
GBM(T=153,N=1157)	Normal	5.3816	GTEX-145MI-0011-R10a-SM-5PNZD
GBM(T=153,N=1157)	Normal	4.4495	GTEX-13NYB-0011-R2a-SM-5MR3C
GBM(T=153,N=1157)	Normal	4.2134	GTEX-ZUA1-0011-R1a-SM-4YCE2
GBM(T=153,N=1157)	Normal	3.775	GTEX-12ZZZ-0011-R3b-SM-5DUXK
GBM(T=153,N=1157)	Normal	4.0635	GTEX-13O3O-0011-R7b-SM-5P9GZ
GBM(T=153,N=1157)	Normal	4.2653	GTEX-WVLH-0011-R8A-SM-3MJFC
GBM(T=153,N=1157)	Normal	4.3183	GTEX-131XH-0011-R4b-SM-5DUWB
GBM(T=153,N=1157)	Normal	4.8141	GTEX-147GR-0011-R9a-SM-5S2UY
GBM(T=153,N=1157)	Normal	6.057	GTEX-13O3Q-3026-SM-5IJGD
GBM(T=153,N=1157)	Normal	3.4789	GTEX-ZVT3-0011-R6a-SM-51MSU
GBM(T=153,N=1157)	Normal	6.7815	GTEX-X4EP-0011-R8B-SM-4QASL
GBM(T=153,N=1157)	Normal	5.9476	GTEX-YJ89-2926-SM-5P9IT
GBM(T=153,N=1157)	Normal	6.0096	GTEX-ZAK1-2926-SM-5HL9S
GBM(T=153,N=1157)	Normal	5.1614	GTEX-11TUW-3126-SM-5GU4Y
GBM(T=153,N=1157)	Normal	4.9275	GTEX-XLM4-0011-R11A-SM-4AT46
GBM(T=153,N=1157)	Normal	4.0251	GTEX-T5JC-0011-R1A-SM-32PM6
GBM(T=153,N=1157)	Normal	4.1723	GTEX-13QIC-0011-R4a-SM-5PNX8
GBM(T=153,N=1157)	Normal	3.3306	GTEX-13CF2-0011-R2a-SM-5L3DC
GBM(T=153,N=1157)	Normal	4.4712	GTEX-N7MS-0011-R5a-SM-2HMK8
GBM(T=153,N=1157)	Normal	3.5248	GTEX-ZDXO-0011-R2b-SM-4WKFG
GBM(T=153,N=1157)	Normal	3.9782	GTEX-13G51-0011-R7b-SM-5LZXG
GBM(T=153,N=1157)	Normal	5.2036	GTEX-X585-0011-R3B-SM-46MVG
GBM(T=153,N=1157)	Normal	4.3096	GTEX-13FLV-0011-R5a-SM-5LZWT
GBM(T=153,N=1157)	Normal	6.0529	GTEX-13FHP-2926-SM-5IJG9
GBM(T=153,N=1157)	Normal	3.2172	GTEX-12WSC-0011-R3a-SM-5P9F1
GBM(T=153,N=1157)	Normal	4.1219	GTEX-12WSA-0011-R10b-SM-5P9ET
GBM(T=153,N=1157)	Normal	6.4082	GTEX-11O72-2826-SM-5HL6W
GBM(T=153,N=1157)	Normal	4.4937	GTEX-11EI6-3026-SM-5GZZO
GBM(T=153,N=1157)	Normal	4.3183	GTEX-148VJ-0011-R9b-SM-5SI77
GBM(T=153,N=1157)	Normal	5.9633	GTEX-N7MT-1226-SM-2D7W4
GBM(T=153,N=1157)	Normal	0	GTEX-T6MN-0011-R10A-SM-5CHQC
GBM(T=153,N=1157)	Normal	5.779	GTEX-11WQK-0011-R11a-SM-5BC6W
GBM(T=153,N=1157)	Normal	4.3455	GTEX-12WSC-0011-R7b-SM-5LU9L
GBM(T=153,N=1157)	Normal	4.1619	GTEX-12WSH-3026-SM-5CVNI
GBM(T=153,N=1157)	Normal	4.4719	GTEX-XLM4-0011-R4B-SM-4AT5C
GBM(T=153,N=1157)	Normal	5.0531	GTEX-13OVJ-0011-R8b-SM-5L3FS
GBM(T=153,N=1157)	Normal	4.541	GTEX-13OW5-0011-R8a-SM-5L3GQ
GBM(T=153,N=1157)	Normal	4.9122	GTEX-X4XX-0011-R10B-SM-46MWO
GBM(T=153,N=1157)	Normal	5.8283	GTEX-145MG-3126-SM-5Q5D3
GBM(T=153,N=1157)	Normal	4.2817	GTEX-13NZ8-0011-R8b-SM-5KM48
GBM(T=153,N=1157)	Normal	3.6241	GTEX-12WSH-0011-R2a-SM-5GU68
GBM(T=153,N=1157)	Normal	3.7484	GTEX-131YS-0011-R3b-SM-5DUXB
GBM(T=153,N=1157)	Normal	4.8324	GTEX-12ZZZ-3026-SM-5BC67
GBM(T=153,N=1157)	Normal	4.9213	TCGA-06-0678-11
GBM(T=153,N=1157)	Normal	5.5008	GTEX-XMD1-0011-R8A-SM-4AT48
GBM(T=153,N=1157)	Normal	5.822	GTEX-QDT8-0011-R11A-SM-32PKD
GBM(T=153,N=1157)	Normal	4.6246	GTEX-145LS-0011-R6b-SM-5PNWL
GBM(T=153,N=1157)	Normal	4.2195	GTEX-11OF3-0011-R8b-SM-57WCS
GBM(T=153,N=1157)	Normal	3.9174	GTEX-PVOW-0011-R1A-SM-32PL6
GBM(T=153,N=1157)	Normal	4.7038	GTEX-QVJO-0011-R8A-SM-447C7
GBM(T=153,N=1157)	Normal	4.4719	GTEX-QVJO-0011-R5A-SM-2S1QM
GBM(T=153,N=1157)	Normal	4.5008	GTEX-WZTO-0011-R6B-SM-4E3J6
GBM(T=153,N=1157)	Normal	6.2141	GTEX-13O3O-3026-SM-5KM42
GBM(T=153,N=1157)	Normal	3.5472	GTEX-13X6J-0011-R6a-SM-5PNUB
GBM(T=153,N=1157)	Normal	4.844	GTEX-ZYFD-3026-SM-5E44C
GBM(T=153,N=1157)	Normal	3.7549	GTEX-13QIC-0011-R3a-SM-5P9HT
GBM(T=153,N=1157)	Normal	4.6293	GTEX-13NZ8-0011-R1b-SM-5KM3V
GBM(T=153,N=1157)	Normal	4.756	GTEX-14BMV-3026-SM-5S2PQ
GBM(T=153,N=1157)	Normal	4.6029	GTEX-13NYS-0011-R6b-SM-5MR3R
GBM(T=153,N=1157)	Normal	5.4845	GTEX-13OW8-0011-R11a-SM-5L3GT
GBM(T=153,N=1157)	Normal	5.7626	GTEX-139TS-3126-SM-5LZWX
GBM(T=153,N=1157)	Normal	4.2578	GTEX-XOTO-0011-R6B-SM-4B65X
GBM(T=153,N=1157)	Normal	3.7824	GTEX-RNOR-0011-R7A-SM-2TF4V
GBM(T=153,N=1157)	Normal	5.0027	GTEX-X4XX-0011-R6B-SM-46MWP
GBM(T=153,N=1157)	Normal	5.7826	GTEX-13O3Q-0011-R11b-SM-5KM2W
GBM(T=153,N=1157)	Normal	3.7656	GTEX-145MH-0011-R1b-SM-5PNWY
GBM(T=153,N=1157)	Normal	4.1546	GTEX-ZE7O-3126-SM-5HL5X
GBM(T=153,N=1157)	Normal	5.8669	GTEX-13G51-3126-SM-5IJG7
GBM(T=153,N=1157)	Normal	3.6206	GTEX-1477Z-0011-R5b-SM-5PNUO
GBM(T=153,N=1157)	Normal	4.3327	GTEX-RVPV-0011-R3A-SM-2TF63
GBM(T=153,N=1157)	Normal	5.894	GTEX-13FXS-3026-SM-5LZYO
GBM(T=153,N=1157)	Normal	4.3674	GTEX-ZDXO-0011-R10a-SM-4WWD8
GBM(T=153,N=1157)	Normal	4.1969	GTEX-144GO-0011-R6b-SM-5S2V7
GBM(T=153,N=1157)	Normal	3.4854	GTEX-13PLJ-0011-R3a-SM-5O9DT
GBM(T=153,N=1157)	Normal	4.8349	GTEX-13QIC-2926-SM-5J2NF
GBM(T=153,N=1157)	Normal	5.0967	GTEX-145MI-0011-R8b-SM-5PNZ9
GBM(T=153,N=1157)	Normal	4.3688	GTEX-12ZZX-0011-R7b-SM-5DUVV
GBM(T=153,N=1157)	Normal	5.8299	GTEX-111FC-3326-SM-5GZYV
GBM(T=153,N=1157)	Normal	3.3715	GTEX-Z93S-0011-R10a-SM-4RGNM
GBM(T=153,N=1157)	Normal	4.3819	GTEX-YFC4-0011-R6b-SM-4V6E1
GBM(T=153,N=1157)	Normal	5.5558	GTEX-13OW7-0011-R11a-SM-5O9DY
GBM(T=153,N=1157)	Normal	5.3244	GTEX-T2IS-0011-R11A-SM-32QPC
GBM(T=153,N=1157)	Normal	4.0858	GTEX-XOTO-0011-R5A-SM-4B657
GBM(T=153,N=1157)	Normal	4.5065	GTEX-139T4-0011-R9b-SM-5HL6S
GBM(T=153,N=1157)	Normal	5.6952	GTEX-13VXU-0011-R11b-SM-5O9DJ
GBM(T=153,N=1157)	Normal	4.6017	GTEX-139TS-0011-R5b-SM-5J2MZ
GBM(T=153,N=1157)	Normal	3.8166	GTEX-11OF3-0011-R5a-SM-57WB4
GBM(T=153,N=1157)	Normal	4.4568	GTEX-Q2AG-0011-R7A-SM-2HMJP
GBM(T=153,N=1157)	Normal	5.9568	GTEX-13X6K-2826-SM-5O9DS
GBM(T=153,N=1157)	Normal	3.859	GTEX-1399T-0011-R1b-SM-5DUWN
GBM(T=153,N=1157)	Normal	6.2904	GTEX-XLM4-2926-SM-4AT59
GBM(T=153,N=1157)	Normal	4.054	GTEX-131XH-0011-R3b-SM-5DUWM
GBM(T=153,N=1157)	Normal	6.2485	GTEX-1192X-3226-SM-5987D
GBM(T=153,N=1157)	Normal	4.0661	GTEX-ZVZQ-0011-R5b-SM-57WDC
GBM(T=153,N=1157)	Normal	4.8783	GTEX-13X6K-0011-R8b-SM-5PNZ4
GBM(T=153,N=1157)	Normal	3.6496	GTEX-12ZZZ-0011-R6b-SM-5EQ5B
GBM(T=153,N=1157)	Normal	3.8972	GTEX-13G51-0011-R6b-SM-5LZX4
GBM(T=153,N=1157)	Normal	4.3944	GTEX-YFC4-0011-R10a-SM-4SOK5
GBM(T=153,N=1157)	Normal	3.849	GTEX-13112-0011-R4b-SM-5DUXL
GBM(T=153,N=1157)	Normal	3.568	GTEX-1313W-0011-R1b-SM-5EQ4A
GBM(T=153,N=1157)	Normal	5.8372	GTEX-Q2AG-2826-SM-2HMJQ
GBMLGG(T=662,N=1157)	Tumor	6.6405	TCGA-19-1787-01
GBMLGG(T=662,N=1157)	Tumor	6.3329	TCGA-S9-A7J2-01
GBMLGG(T=662,N=1157)	Tumor	7.3026	TCGA-E1-A7YI-01
GBMLGG(T=662,N=1157)	Tumor	6.1451	TCGA-06-5412-01
GBMLGG(T=662,N=1157)	Tumor	6.0753	TCGA-DU-7302-01
GBMLGG(T=662,N=1157)	Tumor	6.3296	TCGA-DU-A7TI-01
GBMLGG(T=662,N=1157)	Tumor	6.5157	TCGA-16-0846-01
GBMLGG(T=662,N=1157)	Tumor	6.4022	TCGA-12-5299-01
GBMLGG(T=662,N=1157)	Tumor	5.9678	TCGA-P5-A5EX-01
GBMLGG(T=662,N=1157)	Tumor	6.4497	TCGA-HT-8563-01
GBMLGG(T=662,N=1157)	Tumor	6.2854	TCGA-06-2561-01
GBMLGG(T=662,N=1157)	Tumor	6.649	TCGA-DU-7012-01
GBMLGG(T=662,N=1157)	Tumor	6.5634	TCGA-E1-5322-01
GBMLGG(T=662,N=1157)	Tumor	4.4121	TCGA-HT-8558-01
GBMLGG(T=662,N=1157)	Tumor	6.2132	TCGA-S9-A6U8-01
GBMLGG(T=662,N=1157)	Tumor	5.7663	TCGA-CS-5393-01
GBMLGG(T=662,N=1157)	Tumor	6.1516	TCGA-HT-7854-01
GBMLGG(T=662,N=1157)	Tumor	4.9878	TCGA-HT-7874-01
GBMLGG(T=662,N=1157)	Tumor	5.8184	TCGA-RY-A845-01
GBMLGG(T=662,N=1157)	Tumor	5.1571	TCGA-06-0132-01
GBMLGG(T=662,N=1157)	Tumor	5.8826	TCGA-HT-7616-01
GBMLGG(T=662,N=1157)	Tumor	7.9948	TCGA-KT-A7W1-01
GBMLGG(T=662,N=1157)	Tumor	5.8405	TCGA-P5-A5F2-01
GBMLGG(T=662,N=1157)	Tumor	6.4889	TCGA-26-5136-01
GBMLGG(T=662,N=1157)	Tumor	6.8394	TCGA-27-2521-01
GBMLGG(T=662,N=1157)	Tumor	7.2713	TCGA-19-2629-01
GBMLGG(T=662,N=1157)	Tumor	5.8392	TCGA-06-0238-01
GBMLGG(T=662,N=1157)	Tumor	5.6899	TCGA-06-0749-01
GBMLGG(T=662,N=1157)	Tumor	6.2778	TCGA-CS-5396-01
GBMLGG(T=662,N=1157)	Tumor	5.498	TCGA-HT-7680-01
GBMLGG(T=662,N=1157)	Tumor	7.0822	TCGA-S9-A7IS-01
GBMLGG(T=662,N=1157)	Tumor	7.0276	TCGA-06-0174-01
GBMLGG(T=662,N=1157)	Tumor	5.6049	TCGA-HW-7486-01
GBMLGG(T=662,N=1157)	Tumor	6.0492	TCGA-P5-A5F1-01
GBMLGG(T=662,N=1157)	Tumor	5.3413	TCGA-DU-7011-01
GBMLGG(T=662,N=1157)	Tumor	7.2145	TCGA-06-5414-01
GBMLGG(T=662,N=1157)	Tumor	5.1305	TCGA-P5-A77X-01
GBMLGG(T=662,N=1157)	Tumor	6.6758	TCGA-28-5207-01
GBMLGG(T=662,N=1157)	Tumor	5.2307	TCGA-VM-A8CA-01
GBMLGG(T=662,N=1157)	Tumor	6.1532	TCGA-DU-7015-01
GBMLGG(T=662,N=1157)	Tumor	5.5868	TCGA-TM-A7C5-01
GBMLGG(T=662,N=1157)	Tumor	5.4884	TCGA-DU-8162-01
GBMLGG(T=662,N=1157)	Tumor	6.2166	TCGA-TM-A84O-01
GBMLGG(T=662,N=1157)	Tumor	5.8435	TCGA-06-5410-01
GBMLGG(T=662,N=1157)	Tumor	7.4228	TCGA-06-0747-01
GBMLGG(T=662,N=1157)	Tumor	6.0301	TCGA-FG-A60K-01
GBMLGG(T=662,N=1157)	Tumor	5.8145	TCGA-S9-A7R3-01
GBMLGG(T=662,N=1157)	Tumor	6.0367	TCGA-TQ-A7RN-01
GBMLGG(T=662,N=1157)	Tumor	6.6085	TCGA-28-2513-01
GBMLGG(T=662,N=1157)	Tumor	5.9903	TCGA-DU-A6S6-01
GBMLGG(T=662,N=1157)	Tumor	6.1937	TCGA-S9-A7R2-01
GBMLGG(T=662,N=1157)	Tumor	6.1426	TCGA-P5-A735-01
GBMLGG(T=662,N=1157)	Tumor	7.2081	TCGA-76-4927-01
GBMLGG(T=662,N=1157)	Tumor	5.6062	TCGA-HT-7691-01
GBMLGG(T=662,N=1157)	Tumor	5.557	TCGA-FG-A6J1-01
GBMLGG(T=662,N=1157)	Tumor	7.5061	TCGA-DU-6402-01
GBMLGG(T=662,N=1157)	Tumor	7.1044	TCGA-HT-8104-01
GBMLGG(T=662,N=1157)	Tumor	6.3118	TCGA-FN-7833-01
GBMLGG(T=662,N=1157)	Tumor	6.2655	TCGA-HT-7473-01
GBMLGG(T=662,N=1157)	Tumor	6.687	TCGA-06-0645-01
GBMLGG(T=662,N=1157)	Tumor	7.3609	TCGA-06-2565-01
GBMLGG(T=662,N=1157)	Tumor	3.9874	TCGA-HT-8019-01
GBMLGG(T=662,N=1157)	Tumor	6.5513	TCGA-06-0130-01
GBMLGG(T=662,N=1157)	Tumor	6.1235	TCGA-06-0750-01
GBMLGG(T=662,N=1157)	Tumor	5.6843	TCGA-DB-A4XF-01
GBMLGG(T=662,N=1157)	Tumor	7.5695	TCGA-HT-A5RA-01
GBMLGG(T=662,N=1157)	Tumor	6.797	TCGA-E1-A7YL-01
GBMLGG(T=662,N=1157)	Tumor	5.3448	TCGA-27-1831-01
GBMLGG(T=662,N=1157)	Tumor	6.72	TCGA-HT-A61B-01
GBMLGG(T=662,N=1157)	Tumor	6.0512	TCGA-TM-A7CA-01
GBMLGG(T=662,N=1157)	Tumor	6.5	TCGA-06-5416-01
GBMLGG(T=662,N=1157)	Tumor	5.0742	TCGA-HT-7684-01
GBMLGG(T=662,N=1157)	Tumor	6.9051	TCGA-HW-8322-01
GBMLGG(T=662,N=1157)	Tumor	6.2112	TCGA-S9-A6U9-01
GBMLGG(T=662,N=1157)	Tumor	5.6758	TCGA-HT-7676-01
GBMLGG(T=662,N=1157)	Tumor	7.1913	TCGA-HT-7469-01
GBMLGG(T=662,N=1157)	Tumor	7.0383	TCGA-DH-A7UU-01
GBMLGG(T=662,N=1157)	Tumor	7.3039	TCGA-HT-7873-01
GBMLGG(T=662,N=1157)	Tumor	6.0435	TCGA-HW-A5KK-01
GBMLGG(T=662,N=1157)	Tumor	6.0588	TCGA-DB-A64P-01
GBMLGG(T=662,N=1157)	Tumor	5.5747	TCGA-HT-7478-01
GBMLGG(T=662,N=1157)	Tumor	5.7963	TCGA-S9-A6TX-01
GBMLGG(T=662,N=1157)	Tumor	6.0919	TCGA-RY-A83Z-01
GBMLGG(T=662,N=1157)	Tumor	6.3444	TCGA-FG-6688-01
GBMLGG(T=662,N=1157)	Tumor	5.477	TCGA-06-0141-01
GBMLGG(T=662,N=1157)	Tumor	7.4722	TCGA-06-0125-01
GBMLGG(T=662,N=1157)	Tumor	6.4265	TCGA-FG-A4MT-01
GBMLGG(T=662,N=1157)	Tumor	7.1687	TCGA-76-4925-01
GBMLGG(T=662,N=1157)	Tumor	5.8953	TCGA-FG-A6IZ-01
GBMLGG(T=662,N=1157)	Tumor	4.4483	TCGA-HT-8113-01
GBMLGG(T=662,N=1157)	Tumor	5.7271	TCGA-DH-A7UT-01
GBMLGG(T=662,N=1157)	Tumor	6.8623	TCGA-76-4932-01
GBMLGG(T=662,N=1157)	Tumor	6.6565	TCGA-EZ-7264-01
GBMLGG(T=662,N=1157)	Tumor	6.4861	TCGA-TQ-A7RF-01
GBMLGG(T=662,N=1157)	Tumor	5.8708	TCGA-28-2510-01
GBMLGG(T=662,N=1157)	Tumor	5.4793	TCGA-DB-5274-01
GBMLGG(T=662,N=1157)	Tumor	6.1597	TCGA-S9-A7R8-01
GBMLGG(T=662,N=1157)	Tumor	5.6916	TCGA-FG-7641-01
GBMLGG(T=662,N=1157)	Tumor	5.7295	TCGA-HW-7495-01
GBMLGG(T=662,N=1157)	Tumor	3.6971	TCGA-CS-6669-01
GBMLGG(T=662,N=1157)	Tumor	5.4182	TCGA-HT-7481-01
GBMLGG(T=662,N=1157)	Tumor	6.1985	TCGA-DU-8163-01
GBMLGG(T=662,N=1157)	Tumor	5.6514	TCGA-S9-A6WD-01
GBMLGG(T=662,N=1157)	Tumor	6.0697	TCGA-CS-4942-01
GBMLGG(T=662,N=1157)	Tumor	6.4077	TCGA-HT-8110-01
GBMLGG(T=662,N=1157)	Tumor	6.2441	TCGA-HT-8106-01
GBMLGG(T=662,N=1157)	Tumor	6.5024	TCGA-QH-A6CW-01
GBMLGG(T=662,N=1157)	Tumor	5.7668	TCGA-RY-A840-01
GBMLGG(T=662,N=1157)	Tumor	6.6162	TCGA-06-0743-01
GBMLGG(T=662,N=1157)	Tumor	6.1438	TCGA-HW-8319-01
GBMLGG(T=662,N=1157)	Tumor	5.8843	TCGA-HT-7482-01
GBMLGG(T=662,N=1157)	Tumor	5.8342	TCGA-DU-5870-01
GBMLGG(T=662,N=1157)	Tumor	7.4301	TCGA-E1-5304-01
GBMLGG(T=662,N=1157)	Tumor	5.738	TCGA-TM-A84S-01
GBMLGG(T=662,N=1157)	Tumor	6.5142	TCGA-CS-4943-01
GBMLGG(T=662,N=1157)	Tumor	5.391	TCGA-E1-A7Z3-01
GBMLGG(T=662,N=1157)	Tumor	7.358	TCGA-14-1034-01
GBMLGG(T=662,N=1157)	Tumor	6.4588	TCGA-06-0184-01
GBMLGG(T=662,N=1157)	Tumor	5.93	TCGA-12-3652-01
GBMLGG(T=662,N=1157)	Tumor	6.3561	TCGA-FG-8182-01
GBMLGG(T=662,N=1157)	Tumor	7.1792	TCGA-26-5132-01
GBMLGG(T=662,N=1157)	Tumor	6.2528	TCGA-DU-A5TW-01
GBMLGG(T=662,N=1157)	Tumor	6.2145	TCGA-TQ-A7RP-01
GBMLGG(T=662,N=1157)	Tumor	5.8171	TCGA-HT-7689-01
GBMLGG(T=662,N=1157)	Tumor	5.464	TCGA-FG-7638-01
GBMLGG(T=662,N=1157)	Tumor	7.2897	TCGA-32-1970-01
GBMLGG(T=662,N=1157)	Tumor	5.9727	TCGA-P5-A5EV-01
GBMLGG(T=662,N=1157)	Tumor	5.3558	TCGA-HT-7476-01
GBMLGG(T=662,N=1157)	Tumor	6.2358	TCGA-TQ-A7RG-01
GBMLGG(T=662,N=1157)	Tumor	5.8736	TCGA-TM-A84F-01
GBMLGG(T=662,N=1157)	Tumor	4.3819	TCGA-FG-8181-01
GBMLGG(T=662,N=1157)	Tumor	6.3856	TCGA-DU-A7T6-01
GBMLGG(T=662,N=1157)	Tumor	6.2256	TCGA-DB-A4XC-01
GBMLGG(T=662,N=1157)	Tumor	4.9444	TCGA-06-0219-01
GBMLGG(T=662,N=1157)	Tumor	6.917	TCGA-14-0787-01
GBMLGG(T=662,N=1157)	Tumor	6.6776	TCGA-S9-A6U2-01
GBMLGG(T=662,N=1157)	Tumor	5.9397	TCGA-DB-A75M-01
GBMLGG(T=662,N=1157)	Tumor	6.1349	TCGA-HT-8012-01
GBMLGG(T=662,N=1157)	Tumor	5.8787	TCGA-S9-A7QW-01
GBMLGG(T=662,N=1157)	Tumor	5.0592	TCGA-P5-A733-01
GBMLGG(T=662,N=1157)	Tumor	6.3933	TCGA-E1-A7Z4-01
GBMLGG(T=662,N=1157)	Tumor	6.0246	TCGA-FG-8185-01
GBMLGG(T=662,N=1157)	Tumor	6.7506	TCGA-FG-A4MW-01
GBMLGG(T=662,N=1157)	Tumor	6.2368	TCGA-HW-8320-01
GBMLGG(T=662,N=1157)	Tumor	5.7687	TCGA-DU-5849-01
GBMLGG(T=662,N=1157)	Tumor	7.1828	TCGA-06-0190-01
GBMLGG(T=662,N=1157)	Tumor	5.9334	TCGA-DB-5273-01
GBMLGG(T=662,N=1157)	Tumor	6.3533	TCGA-R8-A6MO-01
GBMLGG(T=662,N=1157)	Tumor	5.5097	TCGA-CS-6670-01
GBMLGG(T=662,N=1157)	Tumor	6.3676	TCGA-DU-5854-01
GBMLGG(T=662,N=1157)	Tumor	6.0121	TCGA-S9-A6WL-01
GBMLGG(T=662,N=1157)	Tumor	7.118	TCGA-S9-A6TV-01
GBMLGG(T=662,N=1157)	Tumor	6.8441	TCGA-26-5135-01
GBMLGG(T=662,N=1157)	Tumor	5.9028	TCGA-S9-A6WE-01
GBMLGG(T=662,N=1157)	Tumor	7.0518	TCGA-76-4931-01
GBMLGG(T=662,N=1157)	Tumor	5.6017	TCGA-QH-A6XA-01
GBMLGG(T=662,N=1157)	Tumor	6.4323	TCGA-DU-6393-01
GBMLGG(T=662,N=1157)	Tumor	6.2963	TCGA-41-3915-01
GBMLGG(T=662,N=1157)	Tumor	5.3715	TCGA-VM-A8C9-01
GBMLGG(T=662,N=1157)	Tumor	6.1252	TCGA-06-0649-01
GBMLGG(T=662,N=1157)	Tumor	5.8721	TCGA-DU-5853-01
GBMLGG(T=662,N=1157)	Tumor	6.7857	TCGA-12-0618-01
GBMLGG(T=662,N=1157)	Tumor	5.625	TCGA-FG-5962-01
GBMLGG(T=662,N=1157)	Tumor	6.5284	TCGA-27-2524-01
GBMLGG(T=662,N=1157)	Tumor	5.5759	TCGA-QH-A65S-01
GBMLGG(T=662,N=1157)	Tumor	6.0228	TCGA-F6-A8O4-01
GBMLGG(T=662,N=1157)	Tumor	7.2596	TCGA-28-1753-01
GBMLGG(T=662,N=1157)	Tumor	6.1791	TCGA-QH-A870-01
GBMLGG(T=662,N=1157)	Tumor	5.6899	TCGA-S9-A7R1-01
GBMLGG(T=662,N=1157)	Tumor	6.1054	TCGA-TQ-A7RH-01
GBMLGG(T=662,N=1157)	Tumor	6.1138	TCGA-12-5295-01
GBMLGG(T=662,N=1157)	Tumor	7.2429	TCGA-E1-A7YQ-01
GBMLGG(T=662,N=1157)	Tumor	7.5218	TCGA-27-2523-01
GBMLGG(T=662,N=1157)	Tumor	4.6865	TCGA-HT-8107-01
GBMLGG(T=662,N=1157)	Tumor	5.8622	TCGA-P5-A5ET-01
GBMLGG(T=662,N=1157)	Tumor	5.5832	TCGA-P5-A72W-01
GBMLGG(T=662,N=1157)	Tumor	5.8468	TCGA-DB-A64L-01
GBMLGG(T=662,N=1157)	Tumor	5.9873	TCGA-HW-7493-01
GBMLGG(T=662,N=1157)	Tumor	4.5619	TCGA-TM-A84R-01
GBMLGG(T=662,N=1157)	Tumor	5.9637	TCGA-HT-A74L-01
GBMLGG(T=662,N=1157)	Tumor	7.6144	TCGA-HT-7477-01
GBMLGG(T=662,N=1157)	Tumor	6.1977	TCGA-FG-A87Q-01
GBMLGG(T=662,N=1157)	Tumor	6.5533	TCGA-FG-A70Z-01
GBMLGG(T=662,N=1157)	Tumor	7.5472	TCGA-FG-A4MU-01
GBMLGG(T=662,N=1157)	Tumor	6.458	TCGA-DB-A4XB-01
GBMLGG(T=662,N=1157)	Tumor	6.1509	TCGA-WY-A85D-01
GBMLGG(T=662,N=1157)	Tumor	5.8415	TCGA-DU-A5TR-01
GBMLGG(T=662,N=1157)	Tumor	6.8095	TCGA-CS-4941-01
GBMLGG(T=662,N=1157)	Tumor	6.2147	TCGA-HT-A615-01
GBMLGG(T=662,N=1157)	Tumor	7.0782	TCGA-06-2569-01
GBMLGG(T=662,N=1157)	Tumor	5.8301	TCGA-HT-A5RB-01
GBMLGG(T=662,N=1157)	Tumor	6.3352	TCGA-E1-A7YN-01
GBMLGG(T=662,N=1157)	Tumor	6.7478	TCGA-27-1830-01
GBMLGG(T=662,N=1157)	Tumor	6.371	TCGA-QH-A6XC-01
GBMLGG(T=662,N=1157)	Tumor	6.9414	TCGA-06-2559-01
GBMLGG(T=662,N=1157)	Tumor	6.0459	TCGA-S9-A6WN-01
GBMLGG(T=662,N=1157)	Tumor	6.1959	TCGA-P5-A72X-01
GBMLGG(T=662,N=1157)	Tumor	5.6179	TCGA-WY-A858-01
GBMLGG(T=662,N=1157)	Tumor	5.5686	TCGA-DU-7014-01
GBMLGG(T=662,N=1157)	Tumor	5.5861	TCGA-27-2526-01
GBMLGG(T=662,N=1157)	Tumor	5.6792	TCGA-VM-A8CF-01
GBMLGG(T=662,N=1157)	Tumor	6.7962	TCGA-06-5856-01
GBMLGG(T=662,N=1157)	Tumor	5.2525	TCGA-26-1442-01
GBMLGG(T=662,N=1157)	Tumor	5.3363	TCGA-CS-4938-01
GBMLGG(T=662,N=1157)	Tumor	6.3093	TCGA-DU-8166-01
GBMLGG(T=662,N=1157)	Tumor	6.1641	TCGA-DU-7300-01
GBMLGG(T=662,N=1157)	Tumor	5.8929	TCGA-DU-7292-01
GBMLGG(T=662,N=1157)	Tumor	5.1752	TCGA-DB-A75P-01
GBMLGG(T=662,N=1157)	Tumor	6.3169	TCGA-06-5418-01
GBMLGG(T=662,N=1157)	Tumor	6.6143	TCGA-FG-6691-01
GBMLGG(T=662,N=1157)	Tumor	7.1296	TCGA-26-5139-01
GBMLGG(T=662,N=1157)	Tumor	5.7206	TCGA-06-5417-01
GBMLGG(T=662,N=1157)	Tumor	6.0514	TCGA-DB-5279-01
GBMLGG(T=662,N=1157)	Tumor	4.3442	TCGA-S9-A6WI-01
GBMLGG(T=662,N=1157)	Tumor	5.8702	TCGA-DB-A64S-01
GBMLGG(T=662,N=1157)	Tumor	6.9618	TCGA-FG-6692-01
GBMLGG(T=662,N=1157)	Tumor	5.4205	TCGA-HW-7489-01
GBMLGG(T=662,N=1157)	Tumor	6.4575	TCGA-R8-A6YH-01
GBMLGG(T=662,N=1157)	Tumor	4.5298	TCGA-26-5134-01
GBMLGG(T=662,N=1157)	Tumor	5.9231	TCGA-HT-8114-01
GBMLGG(T=662,N=1157)	Tumor	6.1803	TCGA-TM-A84H-01
GBMLGG(T=662,N=1157)	Tumor	5.8364	TCGA-DB-A64V-01
GBMLGG(T=662,N=1157)	Tumor	5.8948	TCGA-DU-7019-01
GBMLGG(T=662,N=1157)	Tumor	5.9279	TCGA-S9-A7R4-01
GBMLGG(T=662,N=1157)	Tumor	6.3128	TCGA-S9-A7J3-01
GBMLGG(T=662,N=1157)	Tumor	5.7666	TCGA-TM-A84L-01
GBMLGG(T=662,N=1157)	Tumor	6.0601	TCGA-E1-A7YH-01
GBMLGG(T=662,N=1157)	Tumor	6.4204	TCGA-06-5413-01
GBMLGG(T=662,N=1157)	Tumor	6.1436	TCGA-76-4929-01
GBMLGG(T=662,N=1157)	Tumor	7.05	TCGA-06-0646-01
GBMLGG(T=662,N=1157)	Tumor	5.9136	TCGA-QH-A65Z-01
GBMLGG(T=662,N=1157)	Tumor	7.2086	TCGA-DU-A7TD-01
GBMLGG(T=662,N=1157)	Tumor	6.1837	TCGA-DU-5871-01
GBMLGG(T=662,N=1157)	Tumor	5.5182	TCGA-HW-A5KL-01
GBMLGG(T=662,N=1157)	Tumor	6.0195	TCGA-RY-A83X-01
GBMLGG(T=662,N=1157)	Tumor	6.4067	TCGA-HT-7687-01
GBMLGG(T=662,N=1157)	Tumor	5.687	TCGA-HT-A4DV-01
GBMLGG(T=662,N=1157)	Tumor	5.7677	TCGA-WY-A85A-01
GBMLGG(T=662,N=1157)	Tumor	6.9218	TCGA-12-3650-01
GBMLGG(T=662,N=1157)	Tumor	6.3248	TCGA-19-2620-01
GBMLGG(T=662,N=1157)	Tumor	6.2769	TCGA-DB-5281-01
GBMLGG(T=662,N=1157)	Tumor	5.5925	TCGA-E1-A7YK-01
GBMLGG(T=662,N=1157)	Tumor	5.3355	TCGA-28-5213-01
GBMLGG(T=662,N=1157)	Tumor	6.5563	TCGA-DU-A7TA-01
GBMLGG(T=662,N=1157)	Tumor	7.0082	TCGA-CS-5395-01
GBMLGG(T=662,N=1157)	Tumor	6.4951	TCGA-DH-A7UR-01
GBMLGG(T=662,N=1157)	Tumor	6.0358	TCGA-DU-6400-01
GBMLGG(T=662,N=1157)	Tumor	5.5533	TCGA-06-0138-01
GBMLGG(T=662,N=1157)	Tumor	6.083	TCGA-HT-A5R5-01
GBMLGG(T=662,N=1157)	Tumor	5.5264	TCGA-HT-8018-01
GBMLGG(T=662,N=1157)	Tumor	4.9169	TCGA-FG-A713-01
GBMLGG(T=662,N=1157)	Tumor	6.1813	TCGA-S9-A6WP-01
GBMLGG(T=662,N=1157)	Tumor	6.0186	TCGA-S9-A6U5-01
GBMLGG(T=662,N=1157)	Tumor	6.0813	TCGA-E1-A7YO-01
GBMLGG(T=662,N=1157)	Tumor	6.5622	TCGA-FG-A710-01
GBMLGG(T=662,N=1157)	Tumor	6.1779	TCGA-QH-A6X8-01
GBMLGG(T=662,N=1157)	Tumor	6.5935	TCGA-06-5415-01
GBMLGG(T=662,N=1157)	Tumor	5.7818	TCGA-HT-7610-01
GBMLGG(T=662,N=1157)	Tumor	6.1233	TCGA-HT-7875-01
GBMLGG(T=662,N=1157)	Tumor	5.2559	TCGA-DU-A6S3-01
GBMLGG(T=662,N=1157)	Tumor	5.5774	TCGA-R8-A6MK-01
GBMLGG(T=662,N=1157)	Tumor	5.9103	TCGA-P5-A5F0-01
GBMLGG(T=662,N=1157)	Tumor	5.4208	TCGA-06-0139-01
GBMLGG(T=662,N=1157)	Tumor	6.7518	TCGA-02-0047-01
GBMLGG(T=662,N=1157)	Tumor	6.1542	TCGA-S9-A6TS-01
GBMLGG(T=662,N=1157)	Tumor	5.3027	TCGA-S9-A6TW-01
GBMLGG(T=662,N=1157)	Tumor	5.6818	TCGA-E1-5303-01
GBMLGG(T=662,N=1157)	Tumor	5.9568	TCGA-DU-7299-01
GBMLGG(T=662,N=1157)	Tumor	6.7932	TCGA-DH-5140-01
GBMLGG(T=662,N=1157)	Tumor	5.8125	TCGA-S9-A7QX-01
GBMLGG(T=662,N=1157)	Tumor	6.4112	TCGA-DU-6408-01
GBMLGG(T=662,N=1157)	Tumor	6.9533	TCGA-14-0789-01
GBMLGG(T=662,N=1157)	Tumor	5.723	TCGA-FG-5964-01
GBMLGG(T=662,N=1157)	Tumor	6.3901	TCGA-DB-A64Q-01
GBMLGG(T=662,N=1157)	Tumor	6.1398	TCGA-S9-A6WH-01
GBMLGG(T=662,N=1157)	Tumor	6.3282	TCGA-12-0616-01
GBMLGG(T=662,N=1157)	Tumor	6.0036	TCGA-DU-A6S8-01
GBMLGG(T=662,N=1157)	Tumor	6.1264	TCGA-HT-7858-01
GBMLGG(T=662,N=1157)	Tumor	6.6159	TCGA-32-1982-01
GBMLGG(T=662,N=1157)	Tumor	7.0817	TCGA-HT-7860-01
GBMLGG(T=662,N=1157)	Tumor	6.9123	TCGA-DU-7006-01
GBMLGG(T=662,N=1157)	Tumor	6.2882	TCGA-TQ-A7RS-01
GBMLGG(T=662,N=1157)	Tumor	6.2481	TCGA-DU-7009-01
GBMLGG(T=662,N=1157)	Tumor	6.7316	TCGA-DU-7010-01
GBMLGG(T=662,N=1157)	Tumor	5.8968	TCGA-QH-A6X3-01
GBMLGG(T=662,N=1157)	Tumor	6.7677	TCGA-DU-8164-01
GBMLGG(T=662,N=1157)	Tumor	5.9265	TCGA-DU-7018-01
GBMLGG(T=662,N=1157)	Tumor	5.8863	TCGA-R8-A73M-01
GBMLGG(T=662,N=1157)	Tumor	5.9383	TCGA-DB-A75L-01
GBMLGG(T=662,N=1157)	Tumor	5.7821	TCGA-RY-A843-01
GBMLGG(T=662,N=1157)	Tumor	6.201	TCGA-HT-7693-01
GBMLGG(T=662,N=1157)	Tumor	6.7665	TCGA-DU-A76L-01
GBMLGG(T=662,N=1157)	Tumor	6.3379	TCGA-28-5220-01
GBMLGG(T=662,N=1157)	Tumor	6.2538	TCGA-HT-7472-01
GBMLGG(T=662,N=1157)	Tumor	6.1156	TCGA-14-0817-01
GBMLGG(T=662,N=1157)	Tumor	5.6735	TCGA-12-1597-01
GBMLGG(T=662,N=1157)	Tumor	6.9628	TCGA-06-2570-01
GBMLGG(T=662,N=1157)	Tumor	6.1136	TCGA-TQ-A8XE-01
GBMLGG(T=662,N=1157)	Tumor	5.6946	TCGA-HT-A616-01
GBMLGG(T=662,N=1157)	Tumor	5.9231	TCGA-FG-A4MY-01
GBMLGG(T=662,N=1157)	Tumor	5.3996	TCGA-HT-7681-01
GBMLGG(T=662,N=1157)	Tumor	6.4541	TCGA-CS-5390-01
GBMLGG(T=662,N=1157)	Tumor	6.0332	TCGA-DU-A6S2-01
GBMLGG(T=662,N=1157)	Tumor	6.0963	TCGA-P5-A5EW-01
GBMLGG(T=662,N=1157)	Tumor	5.4657	TCGA-DU-7309-01
GBMLGG(T=662,N=1157)	Tumor	7.2506	TCGA-FG-A87N-01
GBMLGG(T=662,N=1157)	Tumor	5.4896	TCGA-DB-A4XH-01
GBMLGG(T=662,N=1157)	Tumor	6.1322	TCGA-HT-7485-01
GBMLGG(T=662,N=1157)	Tumor	7.4075	TCGA-06-0211-01
GBMLGG(T=662,N=1157)	Tumor	6.2538	TCGA-VV-A86M-01
GBMLGG(T=662,N=1157)	Tumor	6.2521	TCGA-HT-7468-01
GBMLGG(T=662,N=1157)	Tumor	6.859	TCGA-02-2483-01
GBMLGG(T=662,N=1157)	Tumor	6.51	TCGA-HT-7677-01
GBMLGG(T=662,N=1157)	Tumor	6.223	TCGA-VW-A7QS-01
GBMLGG(T=662,N=1157)	Tumor	6.554	TCGA-DU-A5TY-01
GBMLGG(T=662,N=1157)	Tumor	5.2891	TCGA-HT-8109-01
GBMLGG(T=662,N=1157)	Tumor	6.5207	TCGA-06-0156-01
GBMLGG(T=662,N=1157)	Tumor	5.9686	TCGA-S9-A6TZ-01
GBMLGG(T=662,N=1157)	Tumor	5.7743	TCGA-HT-7606-01
GBMLGG(T=662,N=1157)	Tumor	6.7038	TCGA-DH-5142-01
GBMLGG(T=662,N=1157)	Tumor	6.1391	TCGA-DU-7294-01
GBMLGG(T=662,N=1157)	Tumor	5.546	TCGA-HT-7479-01
GBMLGG(T=662,N=1157)	Tumor	6.1609	TCGA-DB-5275-01
GBMLGG(T=662,N=1157)	Tumor	5.2935	TCGA-TM-A7C4-01
GBMLGG(T=662,N=1157)	Tumor	6.7561	TCGA-27-1837-01
GBMLGG(T=662,N=1157)	Tumor	5.4767	TCGA-DU-5872-01
GBMLGG(T=662,N=1157)	Tumor	6.0483	TCGA-FG-8186-01
GBMLGG(T=662,N=1157)	Tumor	6.9474	TCGA-TM-A84I-01
GBMLGG(T=662,N=1157)	Tumor	5.9979	TCGA-S9-A6U6-01
GBMLGG(T=662,N=1157)	Tumor	5.9253	TCGA-E1-5305-01
GBMLGG(T=662,N=1157)	Tumor	6.0181	TCGA-DU-6395-01
GBMLGG(T=662,N=1157)	Tumor	6.797	TCGA-28-5204-01
GBMLGG(T=662,N=1157)	Tumor	5.7581	TCGA-TM-A84T-01
GBMLGG(T=662,N=1157)	Tumor	6.4511	TCGA-HT-7879-01
GBMLGG(T=662,N=1157)	Tumor	6.6015	TCGA-S9-A7IZ-01
GBMLGG(T=662,N=1157)	Tumor	5.3858	TCGA-HT-7602-01
GBMLGG(T=662,N=1157)	Tumor	6.2852	TCGA-32-5222-01
GBMLGG(T=662,N=1157)	Tumor	7.5575	TCGA-DU-A7TJ-01
GBMLGG(T=662,N=1157)	Tumor	7.7089	TCGA-28-5209-01
GBMLGG(T=662,N=1157)	Tumor	5.4825	TCGA-P5-A77W-01
GBMLGG(T=662,N=1157)	Tumor	6.3924	TCGA-27-2519-01
GBMLGG(T=662,N=1157)	Tumor	6.9385	TCGA-CS-6186-01
GBMLGG(T=662,N=1157)	Tumor	6.1175	TCGA-DU-7008-01
GBMLGG(T=662,N=1157)	Tumor	7.1291	TCGA-14-0790-01
GBMLGG(T=662,N=1157)	Tumor	6.0639	TCGA-P5-A5EU-01
GBMLGG(T=662,N=1157)	Tumor	5.2765	TCGA-HT-7688-01
GBMLGG(T=662,N=1157)	Tumor	6.299	TCGA-DU-A7T8-01
GBMLGG(T=662,N=1157)	Tumor	6.5132	TCGA-DB-A64U-01
GBMLGG(T=662,N=1157)	Tumor	7.2322	TCGA-HT-A61C-01
GBMLGG(T=662,N=1157)	Tumor	7.0049	TCGA-12-0821-01
GBMLGG(T=662,N=1157)	Tumor	6.9833	TCGA-19-2619-01
GBMLGG(T=662,N=1157)	Tumor	6.5406	TCGA-F6-A8O3-01
GBMLGG(T=662,N=1157)	Tumor	5.949	TCGA-DB-A64O-01
GBMLGG(T=662,N=1157)	Tumor	5.7743	TCGA-R8-A6ML-01
GBMLGG(T=662,N=1157)	Tumor	6.2087	TCGA-DU-A5TT-01
GBMLGG(T=662,N=1157)	Tumor	6.5526	TCGA-27-1835-01
GBMLGG(T=662,N=1157)	Tumor	5.8069	TCGA-HT-8111-01
GBMLGG(T=662,N=1157)	Tumor	6.0299	TCGA-S9-A7QZ-01
GBMLGG(T=662,N=1157)	Tumor	7.0612	TCGA-12-0619-01
GBMLGG(T=662,N=1157)	Tumor	6.4605	TCGA-06-0168-01
GBMLGG(T=662,N=1157)	Tumor	6.3536	TCGA-IK-7675-01
GBMLGG(T=662,N=1157)	Tumor	6.3556	TCGA-TQ-A7RW-01
GBMLGG(T=662,N=1157)	Tumor	6.2808	TCGA-TQ-A7RU-01
GBMLGG(T=662,N=1157)	Tumor	6.7966	TCGA-27-2528-01
GBMLGG(T=662,N=1157)	Tumor	5.6401	TCGA-HT-7470-01
GBMLGG(T=662,N=1157)	Tumor	6.0084	TCGA-HT-8108-01
GBMLGG(T=662,N=1157)	Tumor	5.9633	TCGA-DB-A4XE-01
GBMLGG(T=662,N=1157)	Tumor	6.2211	TCGA-HT-A4DS-01
GBMLGG(T=662,N=1157)	Tumor	5.8502	TCGA-E1-A7YU-01
GBMLGG(T=662,N=1157)	Tumor	6.2754	TCGA-DU-8158-01
GBMLGG(T=662,N=1157)	Tumor	5.4433	TCGA-HT-7474-01
GBMLGG(T=662,N=1157)	Tumor	5.9432	TCGA-DH-5143-01
GBMLGG(T=662,N=1157)	Tumor	6.1495	TCGA-TQ-A7RJ-01
GBMLGG(T=662,N=1157)	Tumor	6.4057	TCGA-TM-A84J-01
GBMLGG(T=662,N=1157)	Tumor	6.8536	TCGA-E1-A7YD-01
GBMLGG(T=662,N=1157)	Tumor	5.7071	TCGA-S9-A7QY-01
GBMLGG(T=662,N=1157)	Tumor	5.5543	TCGA-P5-A731-01
GBMLGG(T=662,N=1157)	Tumor	6.586	TCGA-E1-A7YE-01
GBMLGG(T=662,N=1157)	Tumor	6.0259	TCGA-HW-8321-01
GBMLGG(T=662,N=1157)	Tumor	5.3075	TCGA-HT-8010-01
GBMLGG(T=662,N=1157)	Tumor	5.526	TCGA-DB-5270-01
GBMLGG(T=662,N=1157)	Tumor	6.0179	TCGA-HT-A5R9-01
GBMLGG(T=662,N=1157)	Tumor	5.738	TCGA-KT-A74X-01
GBMLGG(T=662,N=1157)	Tumor	5.5046	TCGA-HT-A74K-01
GBMLGG(T=662,N=1157)	Tumor	5.6876	TCGA-WY-A85C-01
GBMLGG(T=662,N=1157)	Tumor	6.0828	TCGA-FG-8188-01
GBMLGG(T=662,N=1157)	Tumor	6.3016	TCGA-DU-A6S7-01
GBMLGG(T=662,N=1157)	Tumor	6.4007	TCGA-HT-7855-01
GBMLGG(T=662,N=1157)	Tumor	5.1489	TCGA-HT-8015-01
GBMLGG(T=662,N=1157)	Tumor	5.7525	TCGA-DB-A75O-01
GBMLGG(T=662,N=1157)	Tumor	5.5084	TCGA-S9-A6TY-01
GBMLGG(T=662,N=1157)	Tumor	5.4118	TCGA-DU-A7TB-01
GBMLGG(T=662,N=1157)	Tumor	6.5411	TCGA-HT-7604-01
GBMLGG(T=662,N=1157)	Tumor	5.8726	TCGA-HT-7884-01
GBMLGG(T=662,N=1157)	Tumor	7.3279	TCGA-28-5215-01
GBMLGG(T=662,N=1157)	Tumor	5.26	TCGA-QH-A6CY-01
GBMLGG(T=662,N=1157)	Tumor	7.3206	TCGA-S9-A6WM-01
GBMLGG(T=662,N=1157)	Tumor	5.5066	TCGA-CS-6667-01
GBMLGG(T=662,N=1157)	Tumor	7.1393	TCGA-28-5218-01
GBMLGG(T=662,N=1157)	Tumor	7.2613	TCGA-QH-A6CV-01
GBMLGG(T=662,N=1157)	Tumor	6.105	TCGA-VM-A8CE-01
GBMLGG(T=662,N=1157)	Tumor	5.7584	TCGA-DB-A64X-01
GBMLGG(T=662,N=1157)	Tumor	6.7074	TCGA-P5-A72U-01
GBMLGG(T=662,N=1157)	Tumor	6.4352	TCGA-DB-A75K-01
GBMLGG(T=662,N=1157)	Tumor	6.1717	TCGA-DU-6410-01
GBMLGG(T=662,N=1157)	Tumor	6.6068	TCGA-14-1825-01
GBMLGG(T=662,N=1157)	Tumor	6.2627	TCGA-E1-5307-01
GBMLGG(T=662,N=1157)	Tumor	5.5903	TCGA-S9-A7IY-01
GBMLGG(T=662,N=1157)	Tumor	5.4416	TCGA-P5-A781-01
GBMLGG(T=662,N=1157)	Tumor	6.883	TCGA-DU-6405-01
GBMLGG(T=662,N=1157)	Tumor	7.4796	TCGA-06-0129-01
GBMLGG(T=662,N=1157)	Tumor	6.7173	TCGA-DU-5852-01
GBMLGG(T=662,N=1157)	Tumor	6.3997	TCGA-FG-A6J3-01
GBMLGG(T=662,N=1157)	Tumor	6.3138	TCGA-CS-5397-01
GBMLGG(T=662,N=1157)	Tumor	5.9741	TCGA-FG-A70Y-01
GBMLGG(T=662,N=1157)	Tumor	5.4469	TCGA-FG-7643-01
GBMLGG(T=662,N=1157)	Tumor	6.5037	TCGA-06-5859-01
GBMLGG(T=662,N=1157)	Tumor	6.6623	TCGA-TM-A84C-01
GBMLGG(T=662,N=1157)	Tumor	6.2449	TCGA-WY-A85E-01
GBMLGG(T=662,N=1157)	Tumor	6.545	TCGA-28-1747-01
GBMLGG(T=662,N=1157)	Tumor	6.0033	TCGA-28-2499-01
GBMLGG(T=662,N=1157)	Tumor	6.5403	TCGA-HW-A5KM-01
GBMLGG(T=662,N=1157)	Tumor	5.774	TCGA-32-1980-01
GBMLGG(T=662,N=1157)	Tumor	6.2679	TCGA-DU-7298-01
GBMLGG(T=662,N=1157)	Tumor	6.0946	TCGA-FG-7637-01
GBMLGG(T=662,N=1157)	Tumor	5.9136	TCGA-QH-A65R-01
GBMLGG(T=662,N=1157)	Tumor	6.0728	TCGA-FG-A60J-01
GBMLGG(T=662,N=1157)	Tumor	4.2525	TCGA-FG-8189-01
GBMLGG(T=662,N=1157)	Tumor	5.0063	TCGA-P5-A5EY-01
GBMLGG(T=662,N=1157)	Tumor	6.9122	TCGA-06-2564-01
GBMLGG(T=662,N=1157)	Tumor	7.0389	TCGA-06-5408-01
GBMLGG(T=662,N=1157)	Tumor	6.8231	TCGA-27-1832-01
GBMLGG(T=662,N=1157)	Tumor	4.6153	TCGA-14-1829-01
GBMLGG(T=662,N=1157)	Tumor	5.5846	TCGA-QH-A6X5-01
GBMLGG(T=662,N=1157)	Tumor	6.5934	TCGA-32-2615-01
GBMLGG(T=662,N=1157)	Tumor	7.121	TCGA-06-0158-01
GBMLGG(T=662,N=1157)	Tumor	5.1784	TCGA-HT-7605-01
GBMLGG(T=662,N=1157)	Tumor	6.8801	TCGA-DU-6394-01
GBMLGG(T=662,N=1157)	Tumor	6.1856	TCGA-S9-A6WO-01
GBMLGG(T=662,N=1157)	Tumor	6.5227	TCGA-28-5216-01
GBMLGG(T=662,N=1157)	Tumor	5.7032	TCGA-WY-A859-01
GBMLGG(T=662,N=1157)	Tumor	6.0781	TCGA-WY-A85B-01
GBMLGG(T=662,N=1157)	Tumor	6.3163	TCGA-S9-A6UB-01
GBMLGG(T=662,N=1157)	Tumor	6.7623	TCGA-41-2572-01
GBMLGG(T=662,N=1157)	Tumor	6.7872	TCGA-DU-7290-01
GBMLGG(T=662,N=1157)	Tumor	6.2757	TCGA-P5-A5F6-01
GBMLGG(T=662,N=1157)	Tumor	6.4236	TCGA-DU-6407-01
GBMLGG(T=662,N=1157)	Tumor	6.0485	TCGA-02-0055-01
GBMLGG(T=662,N=1157)	Tumor	6.1534	TCGA-HT-7601-01
GBMLGG(T=662,N=1157)	Tumor	7.3033	TCGA-32-2634-01
GBMLGG(T=662,N=1157)	Tumor	6.6469	TCGA-DU-6403-01
GBMLGG(T=662,N=1157)	Tumor	6.0757	TCGA-DB-A4XG-01
GBMLGG(T=662,N=1157)	Tumor	6.2405	TCGA-DB-A64R-01
GBMLGG(T=662,N=1157)	Tumor	5.1185	TCGA-HW-7487-01
GBMLGG(T=662,N=1157)	Tumor	6.1216	TCGA-S9-A7J1-01
GBMLGG(T=662,N=1157)	Tumor	5.4812	TCGA-FG-6689-01
GBMLGG(T=662,N=1157)	Tumor	7.4382	TCGA-HT-8011-01
GBMLGG(T=662,N=1157)	Tumor	7.4149	TCGA-E1-A7YJ-01
GBMLGG(T=662,N=1157)	Tumor	5.4087	TCGA-06-5411-01
GBMLGG(T=662,N=1157)	Tumor	6.7926	TCGA-DB-5277-01
GBMLGG(T=662,N=1157)	Tumor	6.2359	TCGA-HT-7690-01
GBMLGG(T=662,N=1157)	Tumor	6.745	TCGA-TM-A84M-01
GBMLGG(T=662,N=1157)	Tumor	5.717	TCGA-HT-8105-01
GBMLGG(T=662,N=1157)	Tumor	6.7518	TCGA-06-0744-01
GBMLGG(T=662,N=1157)	Tumor	6.6026	TCGA-76-4928-01
GBMLGG(T=662,N=1157)	Tumor	6.9311	TCGA-06-0644-01
GBMLGG(T=662,N=1157)	Tumor	4.649	TCGA-E1-A7YY-01
GBMLGG(T=662,N=1157)	Tumor	6.2228	TCGA-HT-A619-01
GBMLGG(T=662,N=1157)	Tumor	6.7862	TCGA-E1-5318-01
GBMLGG(T=662,N=1157)	Tumor	5.8189	TCGA-P5-A737-01
GBMLGG(T=662,N=1157)	Tumor	6.4846	TCGA-14-0871-01
GBMLGG(T=662,N=1157)	Tumor	6.0546	TCGA-RY-A83Y-01
GBMLGG(T=662,N=1157)	Tumor	7.4746	TCGA-08-0386-01
GBMLGG(T=662,N=1157)	Tumor	6.0358	TCGA-HT-8564-01
GBMLGG(T=662,N=1157)	Tumor	5.9253	TCGA-HT-7686-01
GBMLGG(T=662,N=1157)	Tumor	6.0936	TCGA-E1-A7YM-01
GBMLGG(T=662,N=1157)	Tumor	6.1006	TCGA-DU-7301-01
GBMLGG(T=662,N=1157)	Tumor	6.684	TCGA-S9-A6UA-01
GBMLGG(T=662,N=1157)	Tumor	7.1139	TCGA-32-2632-01
GBMLGG(T=662,N=1157)	Tumor	6.7036	TCGA-TM-A84G-01
GBMLGG(T=662,N=1157)	Tumor	5.8063	TCGA-VV-A829-01
GBMLGG(T=662,N=1157)	Tumor	6.5535	TCGA-DH-A66B-01
GBMLGG(T=662,N=1157)	Tumor	5.437	TCGA-HT-A5R7-01
GBMLGG(T=662,N=1157)	Tumor	6.0755	TCGA-CS-5394-01
GBMLGG(T=662,N=1157)	Tumor	4.852	TCGA-HT-A61A-01
GBMLGG(T=662,N=1157)	Tumor	5.8091	TCGA-HT-7877-01
GBMLGG(T=662,N=1157)	Tumor	5.8176	TCGA-HT-A618-01
GBMLGG(T=662,N=1157)	Tumor	6.2648	TCGA-06-0882-01
GBMLGG(T=662,N=1157)	Tumor	6.6289	TCGA-DU-6542-01
GBMLGG(T=662,N=1157)	Tumor	6.3857	TCGA-41-4097-01
GBMLGG(T=662,N=1157)	Tumor	5.7562	TCGA-QH-A6CS-01
GBMLGG(T=662,N=1157)	Tumor	5.7996	TCGA-W9-A837-01
GBMLGG(T=662,N=1157)	Tumor	6.7698	TCGA-16-1045-01
GBMLGG(T=662,N=1157)	Tumor	6.003	TCGA-DU-7306-01
GBMLGG(T=662,N=1157)	Tumor	5.7928	TCGA-VM-A8CH-01
GBMLGG(T=662,N=1157)	Tumor	5.824	TCGA-QH-A6X9-01
GBMLGG(T=662,N=1157)	Tumor	5.8965	TCGA-E1-5311-01
GBMLGG(T=662,N=1157)	Tumor	6.6861	TCGA-S9-A6U0-01
GBMLGG(T=662,N=1157)	Tumor	5.4489	TCGA-QH-A6CZ-01
GBMLGG(T=662,N=1157)	Tumor	6.4756	TCGA-HT-7611-01
GBMLGG(T=662,N=1157)	Tumor	6.6505	TCGA-19-2625-01
GBMLGG(T=662,N=1157)	Tumor	5.7801	TCGA-WH-A86K-01
GBMLGG(T=662,N=1157)	Tumor	5.2869	TCGA-DH-5141-01
GBMLGG(T=662,N=1157)	Tumor	5.3541	TCGA-FG-A60L-01
GBMLGG(T=662,N=1157)	Tumor	6.4912	TCGA-DB-5280-01
GBMLGG(T=662,N=1157)	Tumor	6.32	TCGA-S9-A7IX-01
GBMLGG(T=662,N=1157)	Tumor	7.1898	TCGA-HT-A5RC-01
GBMLGG(T=662,N=1157)	Tumor	6.1218	TCGA-FG-5965-01
GBMLGG(T=662,N=1157)	Tumor	6.5527	TCGA-FG-7634-01
GBMLGG(T=662,N=1157)	Tumor	5.8099	TCGA-S9-A6TU-01
GBMLGG(T=662,N=1157)	Tumor	6.4288	TCGA-27-1834-01
GBMLGG(T=662,N=1157)	Tumor	6.6674	TCGA-DU-7007-01
GBMLGG(T=662,N=1157)	Tumor	5.7023	TCGA-HW-7490-01
GBMLGG(T=662,N=1157)	Tumor	6.9442	TCGA-TM-A7C3-01
GBMLGG(T=662,N=1157)	Tumor	6.6793	TCGA-CS-6668-01
GBMLGG(T=662,N=1157)	Tumor	6.6595	TCGA-S9-A6WG-01
GBMLGG(T=662,N=1157)	Tumor	7.5859	TCGA-DU-8165-01
GBMLGG(T=662,N=1157)	Tumor	5.742	TCGA-HT-7692-01
GBMLGG(T=662,N=1157)	Tumor	7.9683	TCGA-TQ-A7RM-01
GBMLGG(T=662,N=1157)	Tumor	5.1132	TCGA-HT-7607-01
GBMLGG(T=662,N=1157)	Tumor	5.0308	TCGA-HT-7880-01
GBMLGG(T=662,N=1157)	Tumor	6.5503	TCGA-DU-8161-01
GBMLGG(T=662,N=1157)	Tumor	5.3398	TCGA-HT-7467-01
GBMLGG(T=662,N=1157)	Tumor	6.211	TCGA-VM-A8CD-01
GBMLGG(T=662,N=1157)	Tumor	6.0424	TCGA-DU-6401-01
GBMLGG(T=662,N=1157)	Tumor	6.5111	TCGA-DU-6396-01
GBMLGG(T=662,N=1157)	Tumor	5.4657	TCGA-HT-A74H-01
GBMLGG(T=662,N=1157)	Tumor	5.5919	TCGA-41-2571-01
GBMLGG(T=662,N=1157)	Tumor	6.1069	TCGA-19-4065-01
GBMLGG(T=662,N=1157)	Tumor	6.2198	TCGA-14-0781-01
GBMLGG(T=662,N=1157)	Tumor	6.2248	TCGA-HT-7483-01
GBMLGG(T=662,N=1157)	Tumor	5.579	TCGA-HT-7620-01
GBMLGG(T=662,N=1157)	Tumor	6.1989	TCGA-HT-7480-01
GBMLGG(T=662,N=1157)	Tumor	7.1956	TCGA-06-0157-01
GBMLGG(T=662,N=1157)	Tumor	7.1525	TCGA-S9-A7J0-01
GBMLGG(T=662,N=1157)	Tumor	7.3046	TCGA-12-3653-01
GBMLGG(T=662,N=1157)	Tumor	5.7955	TCGA-P5-A736-01
GBMLGG(T=662,N=1157)	Tumor	6.6733	TCGA-TM-A84Q-01
GBMLGG(T=662,N=1157)	Tumor	6.4877	TCGA-76-4926-01
GBMLGG(T=662,N=1157)	Tumor	7.0441	TCGA-26-5133-01
GBMLGG(T=662,N=1157)	Tumor	6.6795	TCGA-06-2562-01
GBMLGG(T=662,N=1157)	Tumor	5.5619	TCGA-RY-A847-01
GBMLGG(T=662,N=1157)	Tumor	6.472	TCGA-E1-A7YV-01
GBMLGG(T=662,N=1157)	Tumor	6.2602	TCGA-TQ-A7RQ-01
GBMLGG(T=662,N=1157)	Tumor	5.9069	TCGA-FG-8191-01
GBMLGG(T=662,N=1157)	Tumor	6.1586	TCGA-E1-A7YW-01
GBMLGG(T=662,N=1157)	Tumor	5.8876	TCGA-DB-5278-01
GBMLGG(T=662,N=1157)	Tumor	6.4494	TCGA-E1-A7YS-01
GBMLGG(T=662,N=1157)	Tumor	5.6868	TCGA-HT-7695-01
GBMLGG(T=662,N=1157)	Tumor	5.2122	TCGA-DU-A7TC-01
GBMLGG(T=662,N=1157)	Tumor	6.0273	TCGA-HW-7491-01
GBMLGG(T=662,N=1157)	Tumor	6.1692	TCGA-DB-A4X9-01
GBMLGG(T=662,N=1157)	Tumor	6.3959	TCGA-HT-A614-01
GBMLGG(T=662,N=1157)	Tumor	6.2073	TCGA-TQ-A7RI-01
GBMLGG(T=662,N=1157)	Tumor	7.0751	TCGA-CS-6188-01
GBMLGG(T=662,N=1157)	Tumor	6.1115	TCGA-QH-A86X-01
GBMLGG(T=662,N=1157)	Tumor	5.8209	TCGA-DU-A76R-01
GBMLGG(T=662,N=1157)	Tumor	6.3351	TCGA-DH-5144-01
GBMLGG(T=662,N=1157)	Tumor	6.6123	TCGA-DU-8168-01
GBMLGG(T=662,N=1157)	Tumor	5.9944	TCGA-VM-A8C8-01
GBMLGG(T=662,N=1157)	Tumor	6.9764	TCGA-HT-7882-01
GBMLGG(T=662,N=1157)	Tumor	6.5785	TCGA-DU-6399-01
GBMLGG(T=662,N=1157)	Tumor	6.5382	TCGA-S9-A7R7-01
GBMLGG(T=662,N=1157)	Tumor	7.5125	TCGA-41-5651-01
GBMLGG(T=662,N=1157)	Tumor	6.1619	TCGA-E1-A7Z2-01
GBMLGG(T=662,N=1157)	Tumor	7.0836	TCGA-DU-A5TP-01
GBMLGG(T=662,N=1157)	Tumor	6.3226	TCGA-06-0210-01
GBMLGG(T=662,N=1157)	Tumor	5.5207	TCGA-FG-8187-01
GBMLGG(T=662,N=1157)	Tumor	7.0385	TCGA-19-2624-01
GBMLGG(T=662,N=1157)	Tumor	5.6271	TCGA-IK-8125-01
GBMLGG(T=662,N=1157)	Tumor	7.4592	TCGA-19-5960-01
GBMLGG(T=662,N=1157)	Tumor	6.6461	TCGA-CS-6666-01
GBMLGG(T=662,N=1157)	Tumor	6.7535	TCGA-06-0686-01
GBMLGG(T=662,N=1157)	Tumor	5.9975	TCGA-TM-A7CF-01
GBMLGG(T=662,N=1157)	Tumor	6.1898	TCGA-DH-A7US-01
GBMLGG(T=662,N=1157)	Tumor	7.3468	TCGA-DU-7013-01
GBMLGG(T=662,N=1157)	Tumor	5.9662	TCGA-E1-A7Z6-01
GBMLGG(T=662,N=1157)	Tumor	6.6976	TCGA-HT-7857-01
GBMLGG(T=662,N=1157)	Tumor	5.5855	TCGA-E1-5319-01
GBMLGG(T=662,N=1157)	Tumor	5.7074	TCGA-DU-A5TS-01
GBMLGG(T=662,N=1157)	Tumor	5.1811	TCGA-HT-7856-01
GBMLGG(T=662,N=1157)	Tumor	6.4812	TCGA-DU-6392-01
GBMLGG(T=662,N=1157)	Tumor	5.2574	TCGA-QH-A6CU-01
GBMLGG(T=662,N=1157)	Tumor	6.7493	TCGA-DU-6404-01
GBMLGG(T=662,N=1157)	Tumor	6.6107	TCGA-VW-A8FI-01
GBMLGG(T=662,N=1157)	Tumor	5.5641	TCGA-P5-A5EZ-01
GBMLGG(T=662,N=1157)	Tumor	6.4658	TCGA-S9-A89Z-01
GBMLGG(T=662,N=1157)	Tumor	6.3691	TCGA-FG-5963-01
GBMLGG(T=662,N=1157)	Tumor	4.8719	TCGA-S9-A7IQ-01
GBMLGG(T=662,N=1157)	Tumor	6.6197	TCGA-S9-A89V-01
GBMLGG(T=662,N=1157)	Tumor	7.027	TCGA-DB-A64W-01
GBMLGG(T=662,N=1157)	Tumor	5.4074	TCGA-FG-A4MX-01
GBMLGG(T=662,N=1157)	Tumor	7.3058	TCGA-P5-A72Z-01
GBMLGG(T=662,N=1157)	Tumor	7.189	TCGA-06-2563-01
GBMLGG(T=662,N=1157)	Tumor	6.44	TCGA-S9-A6U1-01
GBMLGG(T=662,N=1157)	Tumor	6.3595	TCGA-15-1444-01
GBMLGG(T=662,N=1157)	Tumor	4.6124	TCGA-32-4213-01
GBMLGG(T=662,N=1157)	Tumor	5.1977	TCGA-HT-7881-01
GBMLGG(T=662,N=1157)	Tumor	6.8668	TCGA-15-0742-01
GBMLGG(T=662,N=1157)	Tumor	6.7666	TCGA-06-0187-01
GBMLGG(T=662,N=1157)	Tumor	7.7347	TCGA-19-1390-01
GBMLGG(T=662,N=1157)	Tumor	5.8107	TCGA-QH-A65V-01
GBMLGG(T=662,N=1157)	Tumor	4.9969	TCGA-DU-A7TG-01
GBMLGG(T=662,N=1157)	Tumor	6.0624	TCGA-TQ-A7RV-01
GBMLGG(T=662,N=1157)	Tumor	6.7451	TCGA-DU-5874-01
GBMLGG(T=662,N=1157)	Tumor	5.9158	TCGA-QH-A6X4-01
GBMLGG(T=662,N=1157)	Tumor	5.9134	TCGA-VM-A8CB-01
GBMLGG(T=662,N=1157)	Tumor	5.7758	TCGA-DH-A66F-01
GBMLGG(T=662,N=1157)	Tumor	5.0917	TCGA-HT-7694-01
GBMLGG(T=662,N=1157)	Tumor	6.6143	TCGA-HT-7471-01
GBMLGG(T=662,N=1157)	Tumor	5.4607	TCGA-HT-7608-01
GBMLGG(T=662,N=1157)	Tumor	5.7655	TCGA-CS-6290-01
GBMLGG(T=662,N=1157)	Tumor	6.3891	TCGA-DB-A4XD-01
GBMLGG(T=662,N=1157)	Tumor	6.6337	TCGA-TQ-A7RK-01
GBMLGG(T=662,N=1157)	Tumor	5.7101	TCGA-HT-7475-01
GBMLGG(T=662,N=1157)	Tumor	6.3811	TCGA-TQ-A7RO-01
GBMLGG(T=662,N=1157)	Tumor	5.6097	TCGA-HT-7902-01
GBMLGG(T=662,N=1157)	Tumor	6.067	TCGA-FG-A711-01
GBMLGG(T=662,N=1157)	Tumor	6.8455	TCGA-06-2557-01
GBMLGG(T=662,N=1157)	Tumor	6.0199	TCGA-DB-5276-01
GBMLGG(T=662,N=1157)	Tumor	5.5744	TCGA-P5-A730-01
GBMLGG(T=662,N=1157)	Tumor	6.3398	TCGA-HT-A74O-01
GBMLGG(T=662,N=1157)	Tumor	5.9553	TCGA-HT-A74J-01
GBMLGG(T=662,N=1157)	Tumor	6.0841	TCGA-DU-5855-01
GBMLGG(T=662,N=1157)	Tumor	7.0598	TCGA-06-0878-01
GBMLGG(T=662,N=1157)	Tumor	7.1564	TCGA-DH-A669-01
GBMLGG(T=662,N=1157)	Tumor	6.1305	TCGA-HT-A617-01
GBMLGG(T=662,N=1157)	Tumor	6.9751	TCGA-06-2567-01
GBMLGG(T=662,N=1157)	Tumor	7.0947	TCGA-32-2616-01
GBMLGG(T=662,N=1157)	Tumor	7.0934	TCGA-28-5208-01
GBMLGG(T=662,N=1157)	Tumor	7.0933	TCGA-28-2514-01
GBMLGG(T=662,N=1157)	Tumor	7.0192	TCGA-06-1804-01
GBMLGG(T=662,N=1157)	Tumor	5.4453	TCGA-QH-A6CX-01
GBMLGG(T=662,N=1157)	Tumor	6.0944	TCGA-14-2554-01
GBMLGG(T=662,N=1157)	Tumor	5.8034	TCGA-P5-A5F4-01
GBMLGG(T=662,N=1157)	Tumor	6.2186	TCGA-DU-A5TU-01
GBMLGG(T=662,N=1157)	Tumor	6.338	TCGA-DU-A76K-01
GBMLGG(T=662,N=1157)	Tumor	5.9413	TCGA-HT-7609-01
GBMLGG(T=662,N=1157)	Tumor	5.7415	TCGA-TQ-A7RR-01
GBMLGG(T=662,N=1157)	Tumor	6.6295	TCGA-DH-A66D-01
GBMLGG(T=662,N=1157)	Tumor	5.9134	TCGA-DH-A7UV-01
GBMLGG(T=662,N=1157)	Tumor	7.4675	TCGA-02-2485-01
GBMLGG(T=662,N=1157)	Tumor	6.9688	TCGA-06-5858-01
GBMLGG(T=662,N=1157)	Tumor	5.9056	TCGA-FG-6690-01
GBMLGG(T=662,N=1157)	Tumor	6.1687	TCGA-DB-A4XA-01
GBMLGG(T=662,N=1157)	Tumor	6.0512	TCGA-DU-8167-01
GBMLGG(T=662,N=1157)	Tumor	5.8429	TCGA-QH-A65X-01
GBMLGG(T=662,N=1157)	Tumor	5.0009	TCGA-06-0178-01
GBMLGG(T=662,N=1157)	Tumor	5.5619	TCGA-P5-A780-01
GBMLGG(T=662,N=1157)	Tumor	6.0343	TCGA-E1-5302-01
GBMLGG(T=662,N=1157)	Tumor	5.3191	TCGA-14-1823-01
GBMLGG(T=662,N=1157)	Tumor	5.332	TCGA-HW-A5KJ-01
GBMLGG(T=662,N=1157)	Tumor	5.9418	TCGA-FG-7636-01
GBMLGG(T=662,N=1157)	Tumor	7.0984	TCGA-DU-5847-01
GBMLGG(T=662,N=1157)	Tumor	6.9064	TCGA-28-2509-01
GBMLGG(T=662,N=1157)	Tumor	7.8844	TCGA-DU-6406-01
GBMLGG(T=662,N=1157)	Tumor	6.3908	TCGA-06-2558-01
GBMLGG(T=662,N=1157)	Tumor	6.4514	TCGA-06-0745-01
GBMLGG(T=662,N=1157)	Tumor	6.9608	TCGA-TM-A84B-01
GBMLGG(T=662,N=1157)	Tumor	5.7756	TCGA-DU-A76O-01
GBMLGG(T=662,N=1157)	Tumor	4.5273	TCGA-CS-4944-01
GBMLGG(T=662,N=1157)	Tumor	4.4409	TCGA-HT-7603-01
GBMLGG(T=662,N=1157)	Normal	4.6622	GTEX-13QIC-0011-R1a-SM-5O9CJ
GBMLGG(T=662,N=1157)	Normal	5.3355	GTEX-N7MS-2526-SM-26GMA
GBMLGG(T=662,N=1157)	Normal	3.278	GTEX-N7MS-2526-SM-26GMR
GBMLGG(T=662,N=1157)	Normal	4.3653	GTEX-NPJ7-0011-R6a-SM-2I3G7
GBMLGG(T=662,N=1157)	Normal	4.6124	GTEX-132Q8-3026-SM-5PNVG
GBMLGG(T=662,N=1157)	Normal	4.6484	GTEX-NPJ7-2726-SM-2I3FT
GBMLGG(T=662,N=1157)	Normal	4.8851	GTEX-13OVJ-0011-R9b-SM-5L3GD
GBMLGG(T=662,N=1157)	Normal	4.7054	GTEX-XLM4-0011-R10A-SM-4AT5P
GBMLGG(T=662,N=1157)	Normal	3.5595	GTEX-12ZZZ-0011-R10a-SM-5P9HC
GBMLGG(T=662,N=1157)	Normal	3.4725	GTEX-X4XY-0011-R8A-SM-46MVC
GBMLGG(T=662,N=1157)	Normal	4.0575	GTEX-13QJC-0011-R6a-SM-5S2VI
GBMLGG(T=662,N=1157)	Normal	3.9155	GTEX-ZUA1-0011-R8b-SM-51MST
GBMLGG(T=662,N=1157)	Normal	3.0479	GTEX-13FHP-0011-R7b-SM-5LZYI
GBMLGG(T=662,N=1157)	Normal	6.0323	GTEX-11EMC-3326-SM-5P9JH
GBMLGG(T=662,N=1157)	Normal	4.3067	GTEX-13112-0011-R7b-SM-5DUVW
GBMLGG(T=662,N=1157)	Normal	4.1301	GTEX-12WSA-0011-R5b-SM-5GU5I
GBMLGG(T=662,N=1157)	Normal	4.3917	GTEX-ZF28-3026-SM-4WKHP
GBMLGG(T=662,N=1157)	Normal	3.9736	GTEX-ZUA1-0011-R7b-SM-4YCDP
GBMLGG(T=662,N=1157)	Normal	3.5789	GTEX-11ZVC-0011-R9a-SM-57WC5
GBMLGG(T=662,N=1157)	Normal	3.9891	GTEX-WZTO-0011-R4A-SM-3NMC7
GBMLGG(T=662,N=1157)	Normal	5.8807	GTEX-NPJ7-0011-R11A-SM-2I3E8
GBMLGG(T=662,N=1157)	Normal	4.2195	GTEX-13OVL-0011-R6a-SM-5L3G4
GBMLGG(T=662,N=1157)	Normal	3.5059	GTEX-13NYB-0011-R1b-SM-5KM4F
GBMLGG(T=662,N=1157)	Normal	4.9996	GTEX-WHSE-0011-R8A-SM-3P5Z1
GBMLGG(T=662,N=1157)	Normal	4.1268	GTEX-T6MN-0011-R4A-SM-32QPG
GBMLGG(T=662,N=1157)	Normal	3.855	GTEX-ZDXO-0011-R1a-SM-4WKF4
GBMLGG(T=662,N=1157)	Normal	4.4229	GTEX-11DXY-3226-SM-5GIDE
[truncated: 20,047 more rows]

## Sheet: DSS
TCGA-GBM	TCGA-19-1787-01	6.6405	385	1
TCGA-GBMLGG	TCGA-19-1787-01	6.6405	385	1
TCGA-LGG	TCGA-S9-A7J2-01	6.3329	62	0
TCGA-GBMLGG	TCGA-S9-A7J2-01	6.3329	62	0
TCGA-CESC	TCGA-EK-A2RE-01	7.1356	57	0
TCGA-LUAD	TCGA-44-6778-01	6.9859	1864	0
TCGA-BRCA	TCGA-C8-A1HL-01	7.5073	317	0
TCGA-BRCA	TCGA-EW-A2FS-01	6.9939	1604	0
TCGA-CESC	TCGA-IR-A3L7-01	7.5636	4483	0
TCGA-LUAD	TCGA-05-4420-01	6.7556	912	0
TCGA-ESCA	TCGA-R6-A8WC-01	8.0492	70	0
TCGA-STES	TCGA-R6-A8WC-01	8.0492	70	0
TCGA-SARC	TCGA-DX-A3U8-01	6.8145	138	1
TCGA-KIRP	TCGA-GL-8500-01	6.3849	841	0
TCGA-KIPAN	TCGA-GL-8500-01	6.3849	841	0
TCGA-PRAD	TCGA-EJ-7125-01	6.8416	2850	0
TCGA-STAD	TCGA-IN-7808-01	7.0185	105	1
TCGA-STES	TCGA-IN-7808-01	7.0185	105	1
TCGA-ESCA	TCGA-L5-A4OH-01	8.1686	992	0
TCGA-STES	TCGA-L5-A4OH-01	8.1686	992	0
TCGA-KIRP	TCGA-B9-A8YH-01	7.0576	532	0
TCGA-KIPAN	TCGA-B9-A8YH-01	7.0576	532	0
TCGA-LGG	TCGA-E1-A7YI-01	7.3026	111	1
TCGA-GBMLGG	TCGA-E1-A7YI-01	7.3026	111	1
TCGA-STAD	TCGA-BR-A4QL-01	6.4927	491	0
TCGA-STES	TCGA-BR-A4QL-01	6.4927	491	0
TCGA-PRAD	TCGA-CH-5751-01	7.3403	1065	0
TCGA-BRCA	TCGA-A2-A3XX-01	7.1987	1439	0
TCGA-HNSC	TCGA-DQ-5624-01	7.1625	1778	0
TCGA-PRAD	TCGA-KK-A7B3-01	7.0548	899	0
TCGA-HNSC	TCGA-DQ-7591-01	6.9011	622	0
TCGA-GBM	TCGA-06-5412-01	6.1451	138	1
TCGA-GBMLGG	TCGA-06-5412-01	6.1451	138	1
TCGA-KIRC	TCGA-BP-4989-01	6.1237	118	0
TCGA-KIPAN	TCGA-BP-4989-01	6.1237	118	0
TCGA-PRAD	TCGA-EJ-8468-01	6.8998	2347	0
TCGA-KIRC	TCGA-CZ-5459-01	6.4666	1683	0
TCGA-KIPAN	TCGA-CZ-5459-01	6.4666	1683	0
TCGA-COAD	TCGA-D5-5538-01	7.4923	1661	1
TCGA-COADREAD	TCGA-D5-5538-01	7.4923	1661	1
TCGA-LUSC	TCGA-56-8305-01	7.2268	105	0
TCGA-THYM	TCGA-4X-A9FA-01	6.8895	392	0
TCGA-LIHC	TCGA-DD-AAW0-01	6.259	2015	0
TCGA-COAD	TCGA-AA-3511-01	7.3653	212	0
TCGA-COADREAD	TCGA-AA-3511-01	7.3653	212	0
TCGA-BRCA	TCGA-Z7-A8R5-01	6.5912	3287	0
TCGA-LUSC	TCGA-39-5031-01	7.2015	1841	0
TCGA-PRAD	TCGA-ZG-A8QW-01	6.6468	94	0
TCGA-LGG	TCGA-DU-7302-01	6.0753	1834	0
TCGA-GBMLGG	TCGA-DU-7302-01	6.0753	1834	0
TCGA-THCA	TCGA-DJ-A3UX-01	6.9176	345	0
TCGA-MESO	TCGA-ZN-A9VQ-01	7.6709	499	0
TCGA-READ	TCGA-EI-6512-01	8.1905	538	0
TCGA-COADREAD	TCGA-EI-6512-01	8.1905	538	0
TCGA-PRAD	TCGA-J4-A83K-01	6.8065	328	0
TCGA-SKCM-M	TCGA-EE-A17X-06	8.0663	907	1
TCGA-SKCM	TCGA-EE-A17X-06	8.0663	907	1
TCGA-LIHC	TCGA-DD-AACA-01	6.7088	2301	0
TCGA-SKCM-M	TCGA-D3-A8GD-06	6.72	718	0
TCGA-SKCM	TCGA-D3-A8GD-06	6.72	718	0
TCGA-OV	TCGA-13-1485-01	6.8167	629	1
TCGA-COAD	TCGA-QG-A5YX-01	7.1538	1003	0
TCGA-COADREAD	TCGA-QG-A5YX-01	7.1538	1003	0
TCGA-PRAD	TCGA-ZG-A9MC-01	6.9559	455	0
TCGA-LGG	TCGA-DU-A7TI-01	6.3296	1183	1
TCGA-GBMLGG	TCGA-DU-A7TI-01	6.3296	1183	1
TCGA-KIRC	TCGA-A3-3335-01	5.8958	1886	0
TCGA-KIPAN	TCGA-A3-3335-01	5.8958	1886	0
TCGA-STAD	TCGA-BR-8372-01	8.1239	951	0
TCGA-STES	TCGA-BR-8372-01	8.1239	951	0
TCGA-PRAD	TCGA-HC-7742-01	7.1019	938	0
TCGA-LUAD	TCGA-64-1679-01	7.6066	2488	0
TCGA-HNSC	TCGA-CV-5976-01	7.5996	1478	0
TCGA-OV	TCGA-25-1315-01	7.015	1583	1
TCGA-TGCT	TCGA-2G-AAFZ-01	8.026	1353	0
TCGA-ESCA	TCGA-LN-A4MQ-01	7.8729	375	0
TCGA-STES	TCGA-LN-A4MQ-01	7.8729	375	0
TCGA-HNSC	TCGA-CV-6948-01	7.7504	1289	0
TCGA-LIHC	TCGA-K7-AAU7-01	7.0482	359	0
TCGA-KIRC	TCGA-CJ-6028-01	6.8502	1625	1
TCGA-KIPAN	TCGA-CJ-6028-01	6.8502	1625	1
TCGA-BRCA	TCGA-B6-A0RL-01	7.3359	2469	0
TCGA-KIRC	TCGA-CZ-5456-01	6.3563	2422	0
TCGA-KIPAN	TCGA-CZ-5456-01	6.3563	2422	0
TCGA-THCA	TCGA-EL-A3D0-01	6.5506	4254	0
TCGA-THCA	TCGA-EM-A22Q-01	5.7159	433	0
TCGA-LUAD	TCGA-49-6744-01	6.6872	1683	0
TCGA-ESCA	TCGA-L5-A4ON-01	7.9636	558	0
TCGA-STES	TCGA-L5-A4ON-01	7.9636	558	0
TCGA-SKCM-M	TCGA-FS-A1ZF-06	7.0676	470	1
TCGA-SKCM	TCGA-FS-A1ZF-06	7.0676	470	1
TCGA-MESO	TCGA-ZN-A9VU-01	7.1675	977	0
TCGA-PAAD	TCGA-Q3-A5QY-01	6.6776	416	0
TCGA-UCEC	TCGA-AJ-A3BI-01	6.515	575	0
TCGA-PCPG	TCGA-W2-A7UY-01	6.134	450	0
TCGA-THCA	TCGA-E3-A3E2-01	6.8297	1922	0
TCGA-PAAD	TCGA-FB-A545-01	7.4454	732	1
TCGA-COAD	TCGA-G4-6320-01	7.4106	804	0
TCGA-COADREAD	TCGA-G4-6320-01	7.4106	804	0
TCGA-SKCM-P	TCGA-EB-A41A-01	6.7936	262	0
TCGA-SKCM	TCGA-EB-A41A-01	6.7936	262	0
TCGA-LUAD	TCGA-55-6982-01	6.82	995	1
TCGA-LIHC	TCGA-RC-A7SH-01	7.0532	468	0
TCGA-LIHC	TCGA-CC-A3MA-01	7.0434	303	1
TCGA-LIHC	TCGA-RC-A7SB-01	5.8851	588	0
TCGA-COAD	TCGA-CM-6164-01	7.6447	883	0
TCGA-COADREAD	TCGA-CM-6164-01	7.6447	883	0
TCGA-THCA	TCGA-ET-A3BW-01	7.2769	1419	0
TCGA-OV	TCGA-09-0369-01	6.9514	1082	1
TCGA-BRCA	TCGA-E2-A2P6-01	7.2449	1051	0
TCGA-UVM	TCGA-VD-A8KF-01	7.0762	40	1
TCGA-THCA	TCGA-EL-A4JZ-01	6.9974	1856	0
TCGA-PRAD	TCGA-M7-A722-01	5.704	1060	0
TCGA-HNSC	TCGA-CV-A6K0-01	7.2057	606	0
TCGA-OV	TCGA-24-1419-01	7.2695	239	0
TCGA-TGCT	TCGA-S6-A8JY-01	7.9953	278	0
TCGA-BRCA	TCGA-AO-A1KT-01	6.7031	541	0
TCGA-UCS	TCGA-N9-A4Q1-01	6.813	2043	1
TCGA-GBM	TCGA-12-5299-01	6.4022	98	1
TCGA-GBMLGG	TCGA-12-5299-01	6.4022	98	1
TCGA-OV	TCGA-29-1761-01	5.691	528	1
TCGA-THCA	TCGA-BJ-A0ZJ-01	6.9615	1280	0
TCGA-LGG	TCGA-P5-A5EX-01	5.9678	243	0
TCGA-GBMLGG	TCGA-P5-A5EX-01	5.9678	243	0
TCGA-THCA	TCGA-DJ-A4V2-01	6.9447	95	0
TCGA-LGG	TCGA-HT-8563-01	6.4497	860	0
TCGA-GBMLGG	TCGA-HT-8563-01	6.4497	860	0
TCGA-THCA	TCGA-J8-A3O2-01	6.6689	342	0
TCGA-BRCA	TCGA-E9-A3HO-01	7.4165	1158	0
TCGA-COAD	TCGA-A6-A567-01	7.072	1881	1
TCGA-COADREAD	TCGA-A6-A567-01	7.072	1881	1
TCGA-LUSC	TCGA-58-A46N-01	7.6971	910	0
TCGA-SKCM-M	TCGA-D3-A3ML-06	7.1094	422	1
TCGA-SKCM	TCGA-D3-A3ML-06	7.1094	422	1
TCGA-STAD	TCGA-CG-4466-01	7.1733	577	0
TCGA-STES	TCGA-CG-4466-01	7.1733	577	0
TCGA-KIRC	TCGA-A3-3383-01	6.3507	861	0
TCGA-KIPAN	TCGA-A3-3383-01	6.3507	861	0
TCGA-BRCA	TCGA-D8-A1XJ-01	7.6559	664	0
TCGA-SARC	TCGA-VT-A80J-01	7.449	796	0
TCGA-CESC	TCGA-Q1-A73Q-01	7.5455	284	0
TCGA-KIRP	TCGA-BQ-5880-01	5.8413	1314	1
TCGA-KIPAN	TCGA-BQ-5880-01	5.8413	1314	1
TCGA-SKCM-M	TCGA-EE-A2GB-06	7.4836	1803	0
TCGA-SKCM	TCGA-EE-A2GB-06	7.4836	1803	0
TCGA-OV	TCGA-24-1845-01	6.2675	116	0
TCGA-THYM	TCGA-ZB-A96L-01	8.7136	1529	0
TCGA-LUAD	TCGA-73-4666-01	7.3826	800	0
TCGA-BLCA	TCGA-MV-A51V-01	6.818	410	0
TCGA-LUSC	TCGA-77-A5G6-01	7.7653	678	1
TCGA-KIRP	TCGA-5P-A9K4-01	7.0365	2184	0
TCGA-KIPAN	TCGA-5P-A9K4-01	7.0365	2184	0
TCGA-UVM	TCGA-VD-A8KE-01	6.7046	821	0
TCGA-LUSC	TCGA-56-A4BX-01	7.7245	405	0
TCGA-THCA	TCGA-BJ-A290-01	7.1819	919	0
TCGA-HNSC	TCGA-CV-6955-01	6.731	334	1
TCGA-HNSC	TCGA-P3-A5Q6-01	6.871	480	1
TCGA-LGG	TCGA-FG-A60K-01	6.0301	542	0
TCGA-GBMLGG	TCGA-FG-A60K-01	6.0301	542	0
TCGA-STAD	TCGA-D7-A4Z0-01	6.674	449	0
TCGA-STES	TCGA-D7-A4Z0-01	6.674	449	0
TCGA-HNSC	TCGA-QK-A64Z-01	7.6233	641	1
TCGA-BRCA	TCGA-AC-A2FK-01	7.1072	2650	0
TCGA-PRAD	TCGA-VP-A879-01	6.9663	728	0
TCGA-OV	TCGA-29-A5NZ-01	8.2489	1088	1
TCGA-PRAD	TCGA-HC-8265-01	5.4501	483	0
TCGA-LUSC	TCGA-37-4129-01	6.0193	242	0
TCGA-LIHC	TCGA-DD-AAVZ-01	6.4998	1900	0
TCGA-THCA	TCGA-DJ-A13R-01	5.4353	565	0
TCGA-BRCA	TCGA-E9-A1R4-01	7.541	186	0
TCGA-MESO	TCGA-3U-A98F-01	7.6387	536	1
TCGA-CESC	TCGA-C5-A1MF-01	5.6573	1617	0
TCGA-BRCA	TCGA-LL-A740-01	6.9865	441	0
TCGA-READ	TCGA-F5-6863-01	7.5376	361	1
TCGA-COADREAD	TCGA-F5-6863-01	7.5376	361	1
TCGA-GBM	TCGA-06-2565-01	7.3609	506	1
TCGA-GBMLGG	TCGA-06-2565-01	7.3609	506	1
TCGA-LUSC	TCGA-33-AASD-01	6.9694	3376	1
TCGA-THCA	TCGA-ET-A3BS-01	6.1211	176	0
TCGA-BRCA	TCGA-BH-A0BZ-01	7.4368	2255	0
TCGA-LUAD	TCGA-MN-A4N1-01	7.3625	827	0
TCGA-HNSC	TCGA-IQ-A61O-01	6.5309	421	0
TCGA-LUSC	TCGA-92-8063-01	7.3472	122	0
TCGA-LUAD	TCGA-55-7911-01	6.9574	537	0
TCGA-LIHC	TCGA-ED-A627-01	6.3311	423	0
TCGA-UCS	TCGA-N6-A4VC-01	7.3554	597	1
TCGA-BRCA	TCGA-C8-A3M8-01	7.5964	394	0
TCGA-THCA	TCGA-BJ-A0ZF-01	6.6721	1217	0
TCGA-BRCA	TCGA-BH-A0BM-01	6.7173	1876	0
TCGA-SKCM-M	TCGA-ER-A19S-06	6.6497	1505	0
TCGA-SKCM	TCGA-ER-A19S-06	6.6497	1505	0
TCGA-COAD	TCGA-DM-A0X9-01	7.2059	3641	0
TCGA-COADREAD	TCGA-DM-A0X9-01	7.2059	3641	0
TCGA-COAD	TCGA-AY-A69D-01	8.3919	543	0
TCGA-COADREAD	TCGA-AY-A69D-01	8.3919	543	0
TCGA-BRCA	TCGA-AN-A0XW-01	7.246	170	0
TCGA-LUAD	TCGA-55-A4DG-01	6.5179	608	0
TCGA-PCPG	TCGA-RW-A684-01	6.3595	32	0
TCGA-THCA	TCGA-BJ-A45C-01	7.0069	243	1
TCGA-THCA	TCGA-ET-A2N4-01	6.9741	81	0
TCGA-LUSC	TCGA-58-A46J-01	7.4816	2589	0
TCGA-SKCM-M	TCGA-EE-A3AB-06	6.8333	3733	0
TCGA-SKCM	TCGA-EE-A3AB-06	6.8333	3733	0
TCGA-OV	TCGA-24-1426-01	5.8485	163	0
TCGA-OV	TCGA-24-1551-01	7.071	1579	1
TCGA-GBM	TCGA-06-2561-01	6.2854	537	1
TCGA-GBMLGG	TCGA-06-2561-01	6.2854	537	1
TCGA-PRAD	TCGA-KK-A8I5-01	6.7911	3096	0
TCGA-STAD	TCGA-IN-8663-01	8.3331	103	0
TCGA-STES	TCGA-IN-8663-01	8.3331	103	0
TCGA-LIHC	TCGA-DD-AAVV-01	6.4271	2455	0
TCGA-CESC	TCGA-ZJ-A8QQ-01	7.4054	2056	0
TCGA-LUSC	TCGA-37-4133-01	5.4406	238	0
TCGA-LUSC	TCGA-77-8146-01	7.0462	3189	0
TCGA-TGCT	TCGA-2G-AAHN-01	7.5506	6445	0
TCGA-LUAD	TCGA-L9-A5IP-01	7.2538	58	1
TCGA-KIRC	TCGA-CJ-5672-01	6.6487	2190	0
TCGA-KIPAN	TCGA-CJ-5672-01	6.6487	2190	0
TCGA-LUAD	TCGA-73-4662-01	7.1808	2515	0
TCGA-MESO	TCGA-3U-A98I-01	7.23	860	1
TCGA-HNSC	TCGA-CQ-5327-01	7.2623	1660	0
TCGA-BRCA	TCGA-E2-A1LL-01	7.6237	1309	0
TCGA-BLCA	TCGA-FD-A3SR-01	7.6265	602	1
TCGA-PRAD	TCGA-KK-A8II-01	7.0839	3467	1
TCGA-OV	TCGA-24-1923-01	6.4764	690	1
TCGA-BRCA	TCGA-BH-A18K-01	7.1665	2763	1
TCGA-BRCA	TCGA-BH-A28O-01	7.0791	1120	0
TCGA-LUAD	TCGA-55-6712-01	6.756	171	1
TCGA-SKCM-P	TCGA-XV-AAZW-01	6.9177	393	1
TCGA-SKCM	TCGA-XV-AAZW-01	6.9177	393	1
TCGA-PAAD	TCGA-F2-7276-01	6.9153	216	1
TCGA-THCA	TCGA-BJ-A0Z2-01	7.0373	1514	0
TCGA-BLCA	TCGA-DK-A6B0-01	6.8714	2330	0
TCGA-LUAD	TCGA-97-7553-01	6.9218	1870	0
TCGA-THCA	TCGA-ET-A2N0-01	5.9011	1600	0
TCGA-PAAD	TCGA-FB-A7DR-01	6.9523	353	1
TCGA-SKCM-M	TCGA-D3-A5GR-06	6.8119	5424	0
TCGA-SKCM	TCGA-D3-A5GR-06	6.8119	5424	0
TCGA-PAAD	TCGA-YB-A89D-01	7.1131	350	0
TCGA-PRAD	TCGA-CH-5752-01	7.1932	943	0
TCGA-LUSC	TCGA-77-7142-01	7.4666	2227	0
TCGA-THCA	TCGA-KS-A4I1-01	7.3268	812	0
TCGA-LUSC	TCGA-60-2719-01	8.1615	1297	0
TCGA-ESCA	TCGA-VR-A8Q7-01	7.5966	1590	0
TCGA-STES	TCGA-VR-A8Q7-01	7.5966	1590	0
TCGA-BRCA	TCGA-A7-A4SC-01	7.3661	446	0
TCGA-BLCA	TCGA-FD-A5BS-01	5.8136	1639	0
TCGA-KIRP	TCGA-J7-6720-01	6.5962	388	0
TCGA-KIPAN	TCGA-J7-6720-01	6.5962	388	0
TCGA-BRCA	TCGA-E9-A24A-01	7.2675	747	0
TCGA-LUAD	TCGA-49-AARE-01	7.2525	1229	1
TCGA-LIHC	TCGA-BC-4073-01	7.0174	849	0
TCGA-BRCA	TCGA-AC-A6IV-01	7.2628	568	0
TCGA-BLCA	TCGA-DK-A1AD-01	7.0127	3420	0
TCGA-BRCA	TCGA-B6-A400-01	7.5074	215	0
TCGA-THCA	TCGA-EM-A2OW-01	6.2547	1227	0
TCGA-BLCA	TCGA-XF-AAMQ-01	7.6576	2177	0
TCGA-THCA	TCGA-EM-A2OZ-01	6.8395	1033	0
TCGA-PCPG	TCGA-WB-A816-01	6.3395	1254	0
TCGA-THCA	TCGA-EM-A1CS-01	7.6469	817	0
TCGA-KIRC	TCGA-B0-5075-01	6.5433	637	0
TCGA-KIPAN	TCGA-B0-5075-01	6.5433	637	0
TCGA-SKCM-M	TCGA-W3-AA1R-06	7.1455	3379	1
TCGA-SKCM	TCGA-W3-AA1R-06	7.1455	3379	1
TCGA-HNSC	TCGA-P3-A6T0-01	7.5089	578	0
TCGA-OV	TCGA-13-0899-01	6.2216	2012	1
TCGA-COAD	TCGA-AY-A8YK-01	7.5571	573	0
TCGA-COADREAD	TCGA-AY-A8YK-01	7.5571	573	0
TCGA-LIHC	TCGA-QA-A7B7-01	6.9864	94	0
TCGA-SKCM-M	TCGA-DA-A1IC-06	7.0019	2071	1
TCGA-SKCM	TCGA-DA-A1IC-06	7.0019	2071	1
TCGA-UCEC	TCGA-A5-AB3J-01	6.8515	512	0
TCGA-LUAD	TCGA-50-8460-01	6.4437	829	0
TCGA-UCEC	TCGA-PG-A917-01	7.1757	212	0
TCGA-PAAD	TCGA-IB-7889-01	6.0768	481	1
TCGA-THCA	TCGA-EM-A3SY-01	6.0628	411	0
TCGA-PRAD	TCGA-ZG-A9L1-01	7.4648	1302	0
TCGA-HNSC	TCGA-CN-5361-01	7.2647	2120	0
TCGA-CESC	TCGA-EX-A3L1-01	7.5012	463	0
TCGA-LUAD	TCGA-50-5933-01	7.6222	2393	0
TCGA-BLCA	TCGA-FT-A3EE-01	7.1295	99	0
TCGA-SARC	TCGA-IE-A4EH-01	6.7626	819	0
TCGA-THYM	TCGA-ZB-A96E-01	7.4736	1819	0
TCGA-LUSC	TCGA-43-3394-01	6.3169	1190	1
TCGA-BLCA	TCGA-ZF-AA4T-01	7.7499	599	1
TCGA-MESO	TCGA-MQ-A6BQ-01	6.8248	2359	0
TCGA-BRCA	TCGA-E2-A1LH-01	6.5227	3247	0
TCGA-THCA	TCGA-ET-A39P-01	6.7116	2900	0
TCGA-OV	TCGA-29-1769-01	6.4011	699	0
TCGA-PAAD	TCGA-IB-7890-01	7.2642	598	1
TCGA-LUSC	TCGA-18-3409-01	6.7262	3747	0
TCGA-KIRC	TCGA-CJ-4899-01	7.4282	1528	0
TCGA-KIPAN	TCGA-CJ-4899-01	7.4282	1528	0
TCGA-BLCA	TCGA-E7-A3X6-01	7.2736	904	1
TCGA-COAD	TCGA-5M-AAT4-01	7.453	49	1
TCGA-COADREAD	TCGA-5M-AAT4-01	7.453	49	1
TCGA-OV	TCGA-24-1474-01	7.0666	676	1
TCGA-MESO	TCGA-3H-AB3U-01	6.7992	826	1
TCGA-ESCA	TCGA-2H-A9GF-01	8.4641	784	1
TCGA-STES	TCGA-2H-A9GF-01	8.4641	784	1
TCGA-COAD	TCGA-CM-6167-01	6.8588	456	0
TCGA-COADREAD	TCGA-CM-6167-01	6.8588	456	0
TCGA-HNSC	TCGA-CR-7370-01	8.0989	105	0
TCGA-KIRP	TCGA-BQ-5888-01	6.0446	403	0
TCGA-KIPAN	TCGA-BQ-5888-01	6.0446	403	0
TCGA-BRCA	TCGA-B6-A0RH-01	7.205	6456	0
TCGA-THCA	TCGA-EL-A3ZG-01	6.4889	2724	0
TCGA-BRCA	TCGA-A8-A07W-01	8.1343	304	0
TCGA-PCPG	TCGA-QR-A6GY-01	7.0779	32	0
TCGA-UVM	TCGA-VD-A8KA-01	7.2238	1178	0
TCGA-PRAD	TCGA-YL-A8HJ-01	6.7677	1611	0
TCGA-LUAD	TCGA-44-6774-01	6.7274	658	0
TCGA-BLCA	TCGA-GU-A762-01	7.1398	232	1
TCGA-KIRP	TCGA-2Z-A9JK-01	6.6439	1186	0
TCGA-KIPAN	TCGA-2Z-A9JK-01	6.6439	1186	0
TCGA-LGG	TCGA-CS-5397-01	6.3138	194	1
TCGA-GBMLGG	TCGA-CS-5397-01	6.3138	194	1
TCGA-UCEC	TCGA-AX-A3G8-01	5.9468	36	0
TCGA-ACC	TCGA-OR-A5K3-01	5.5668	3465	0
TCGA-KIRC	TCGA-CZ-4860-01	6.234	206	1
TCGA-KIPAN	TCGA-CZ-4860-01	6.234	206	1
TCGA-THCA	TCGA-BJ-A28S-01	7.14	640	0
TCGA-OV	TCGA-09-2048-01	6.3254	138	1
TCGA-LUAD	TCGA-73-4670-01	6.962	131	0
TCGA-PRAD	TCGA-ZG-A9L5-01	7.5425	908	0
TCGA-HNSC	TCGA-CN-5365-01	6.5362	351	1
TCGA-HNSC	TCGA-MT-A7BN-01	6.7234	469	0
TCGA-KIRC	TCGA-B0-5700-01	6.9196	1790	0
TCGA-KIPAN	TCGA-B0-5700-01	6.9196	1790	0
TCGA-SKCM-P	TCGA-BF-A5ER-01	7.333	327	0
TCGA-SKCM	TCGA-BF-A5ER-01	7.333	327	0
TCGA-CESC	TCGA-JW-A5VI-01	7.3806	747	0
TCGA-PRAD	TCGA-XK-AAJT-01	6.1542	1434	0
TCGA-LUSC	TCGA-56-A4BW-01	7.2736	585	0
TCGA-LUSC	TCGA-56-8308-01	7.0433	517	0
TCGA-HNSC	TCGA-CV-6956-01	7.0892	217	1
TCGA-HNSC	TCGA-DQ-5631-01	7.9971	548	1
TCGA-LUSC	TCGA-85-8353-01	7.4555	94	1
TCGA-OV	TCGA-36-1580-01	6.5364	737	1
TCGA-STAD	TCGA-BR-7716-01	7.8634	1210	0
TCGA-STES	TCGA-BR-7716-01	7.8634	1210	0
TCGA-LIHC	TCGA-HP-A5N0-01	5.9957	1147	1
TCGA-HNSC	TCGA-CR-7369-01	7.8522	1090	0
TCGA-LUAD	TCGA-55-A48Z-01	7.3446	651	0
TCGA-LGG	TCGA-HT-8558-01	4.4121	418	0
TCGA-GBMLGG	TCGA-HT-8558-01	4.4121	418	0
TCGA-BLCA	TCGA-FD-A43S-01	6.3567	455	0
TCGA-UCEC	TCGA-5B-A90C-01	7.6434	1202	0
TCGA-BRCA	TCGA-B6-A0X7-01	7.171	1781	0
TCGA-BRCA	TCGA-EW-A1P0-01	7.5885	1251	0
TCGA-THCA	TCGA-DE-A7U5-01	6.7576	84	0
TCGA-SKCM-M	TCGA-D3-A5GU-06	6.8102	3808	0
TCGA-SKCM	TCGA-D3-A5GU-06	6.8102	3808	0
TCGA-BLCA	TCGA-XF-A8HE-01	7.4651	3817	0
TCGA-HNSC	TCGA-QK-A6IG-01	7.6672	222	1
TCGA-LUSC	TCGA-22-4604-01	7.0189	399	1
TCGA-BLCA	TCGA-BT-A42F-01	6.7291	864	0
TCGA-OV	TCGA-61-1900-01	7.2157	176	0
TCGA-KIRP	TCGA-Y8-A894-01	7.6189	567	0
TCGA-KIPAN	TCGA-Y8-A894-01	7.6189	567	0
TCGA-LGG	TCGA-S9-A6U8-01	6.2132	2988	1
TCGA-GBMLGG	TCGA-S9-A6U8-01	6.2132	2988	1
TCGA-READ	TCGA-DC-5337-01	6.7609	792	0
TCGA-COADREAD	TCGA-DC-5337-01	6.7609	792	0
TCGA-HNSC	TCGA-CV-7261-01	7.4521	1512	0
TCGA-THCA	TCGA-BJ-A192-01	6.3163	1349	0
TCGA-KICH	TCGA-KL-8345-01	6.4927	1665	0
TCGA-KIPAN	TCGA-KL-8345-01	6.4927	1665	0
TCGA-KIRC	TCGA-BP-4998-01	7.1171	932	0
TCGA-KIPAN	TCGA-BP-4998-01	7.1171	932	0
TCGA-CHOL	TCGA-ZH-A8Y5-01	7.5526	1229	0
TCGA-THCA	TCGA-EL-A3T9-01	6.6298	174	1
TCGA-ACC	TCGA-OR-A5J2-01	6.7807	1677	1
TCGA-HNSC	TCGA-T2-A6X2-01	7.3885	987	0
TCGA-HNSC	TCGA-CR-6492-01	7.291	479	0
TCGA-BLCA	TCGA-G2-A3IB-01	7.0906	220	1
TCGA-BRCA	TCGA-EW-A1PC-01	7.4158	187	0
TCGA-THCA	TCGA-FK-A3SB-01	7.2476	125	0
TCGA-KIRC	TCGA-CJ-5675-01	6.9658	3936	0
TCGA-KIPAN	TCGA-CJ-5675-01	6.9658	3936	0
TCGA-BLCA	TCGA-CU-A3KJ-01	7.3784	562	0
TCGA-BRCA	TCGA-A7-A0CH-01	7.0488	1079	0
TCGA-COAD	TCGA-CM-6168-01	7.6534	395	0
TCGA-COADREAD	TCGA-CM-6168-01	7.6534	395	0
TCGA-HNSC	TCGA-QK-A6IF-01	7.4362	704	0
TCGA-BRCA	TCGA-E9-A2JS-01	6.9376	904	1
TCGA-CESC	TCGA-EA-A1QT-01	7.5047	1243	0
TCGA-BRCA	TCGA-A2-A1G6-01	7.2879	501	0
TCGA-SARC	TCGA-LI-A67I-01	6.9004	922	0
TCGA-TGCT	TCGA-W4-A7U4-01	8.0714	738	0
TCGA-THCA	TCGA-EL-A3ZL-01	6.5215	1895	0
TCGA-TGCT	TCGA-XY-A8S3-01	8.2264	843	0
TCGA-LGG	TCGA-HT-7854-01	6.1516	1201	0
TCGA-GBMLGG	TCGA-HT-7854-01	6.1516	1201	0
TCGA-LUAD	TCGA-44-A47A-01	7.4674	466	0
TCGA-BRCA	TCGA-B6-A0WV-01	7.5936	2417	0
TCGA-PCPG	TCGA-WB-A81J-01	7.0719	741	0
TCGA-TGCT	TCGA-2G-AAL5-01	7.9782	7437	0
TCGA-KIRP	TCGA-HE-7129-01	7.5772	2492	0
TCGA-KIPAN	TCGA-HE-7129-01	7.5772	2492	0
TCGA-LUAD	TCGA-05-4398-01	7.2663	1431	0
TCGA-HNSC	TCGA-HD-7753-01	7.4259	866	0
TCGA-HNSC	TCGA-BA-5559-01	7.9375	2083	1
TCGA-PRAD	TCGA-KK-A59X-01	6.6492	2535	0
TCGA-BRCA	TCGA-UL-AAZ6-01	7.1491	518	0
TCGA-BRCA	TCGA-B6-A0RG-01	7.498	2082	0
TCGA-PCPG	TCGA-SP-A6QC-01	6.2979	3491	0
TCGA-LUSC	TCGA-56-7579-01	7.0717	951	1
TCGA-LUAD	TCGA-67-3773-01	6.0199	427	0
TCGA-OV	TCGA-24-1562-01	7.1135	1384	1
TCGA-THCA	TCGA-FE-A235-01	6.8934	3571	0
TCGA-THCA	TCGA-EM-A3SU-01	5.9165	911	0
TCGA-LGG	TCGA-HT-7874-01	4.9878	1130	0
TCGA-GBMLGG	TCGA-HT-7874-01	4.9878	1130	0
TCGA-SKCM-M	TCGA-FS-A1ZB-06	7.2515	1486	1
TCGA-SKCM	TCGA-FS-A1ZB-06	7.2515	1486	1
TCGA-BRCA	TCGA-A7-A0DC-01	6.8206	906	0
TCGA-BRCA	TCGA-A2-A0CR-01	6.4099	3283	0
TCGA-BRCA	TCGA-GM-A2DD-01	6.8231	2282	0
TCGA-LGG	TCGA-S9-A6TV-01	7.118	571	0
TCGA-GBMLGG	TCGA-S9-A6TV-01	7.118	571	0
TCGA-BRCA	TCGA-BH-A6R9-01	6.9653	160	0
TCGA-LUSC	TCGA-39-5039-01	6.7067	544	0
TCGA-CESC	TCGA-UC-A7PG-01	7.1062	370	1
TCGA-BLCA	TCGA-DK-A3IS-01	7.725	1529	0
TCGA-HNSC	TCGA-CV-6943-01	7.3755	602	1
TCGA-LUAD	TCGA-64-5781-01	6.5368	1559	0
TCGA-BRCA	TCGA-HN-A2OB-01	7.2751	1900	1
TCGA-HNSC	TCGA-CQ-7068-01	7.4569	1309	0
TCGA-LGG	TCGA-VM-A8CD-01	6.211	240	1
TCGA-GBMLGG	TCGA-VM-A8CD-01	6.211	240	1
TCGA-LUAD	TCGA-97-7552-01	6.8348	1932	0
TCGA-BRCA	TCGA-UU-A93S-01	6.8439	116	1
TCGA-SARC	TCGA-QC-AA9N-01	7.3574	537	0
TCGA-THCA	TCGA-EM-A2CJ-01	6.9037	1447	0
TCGA-COAD	TCGA-AA-3697-01	7.574	2587	0
TCGA-COADREAD	TCGA-AA-3697-01	7.574	2587	0
TCGA-HNSC	TCGA-CV-5444-01	7.0283	2437	0
TCGA-BRCA	TCGA-AR-A24P-01	7.1457	84	0
TCGA-KIRP	TCGA-SX-A7SM-01	6.9925	363	1
TCGA-KIPAN	TCGA-SX-A7SM-01	6.9925	363	1
TCGA-THCA	TCGA-DJ-A4V5-01	7.0886	1076	0
TCGA-LIHC	TCGA-DD-AAEI-01	5.7777	1531	0
TCGA-COAD	TCGA-AZ-4615-01	7.4814	1002	0
TCGA-COADREAD	TCGA-AZ-4615-01	7.4814	1002	0
TCGA-GBM	TCGA-06-0132-01	5.1571	771	1
TCGA-GBMLGG	TCGA-06-0132-01	5.1571	771	1
TCGA-ESCA	TCGA-VR-A8EO-01	8.3489	785	0
TCGA-STES	TCGA-VR-A8EO-01	8.3489	785	0
TCGA-KIRP	TCGA-HE-A5NK-01	6.5529	2228	0
TCGA-KIPAN	TCGA-HE-A5NK-01	6.5529	2228	0
TCGA-THCA	TCGA-ET-A25G-01	6.7607	2492	0
TCGA-HNSC	TCGA-CR-7395-01	7.2768	930	0
TCGA-STAD	TCGA-VQ-A91D-01	7.8293	356	1
TCGA-STES	TCGA-VQ-A91D-01	7.8293	356	1
TCGA-STAD	TCGA-BR-7196-01	7.5227	666	0
TCGA-STES	TCGA-BR-7196-01	7.5227	666	0
TCGA-OV	TCGA-23-1113-01	6.6443	949	1
TCGA-KIRC	TCGA-BP-4777-01	6.2246	1731	0
TCGA-KIPAN	TCGA-BP-4777-01	6.2246	1731	0
TCGA-OV	TCGA-24-2290-01	4.1867	1102	1
TCGA-THCA	TCGA-ET-A39J-01	7.1435	3227	0
TCGA-BRCA	TCGA-E9-A1N9-01	7.6511	1101	0
TCGA-BRCA	TCGA-B6-A0I9-01	7.3747	362	1
TCGA-HNSC	TCGA-CN-6022-01	7.715	281	1
TCGA-THCA	TCGA-E8-A242-01	6.313	950	0
TCGA-THCA	TCGA-DJ-A2Q5-01	6.7641	1140	0
TCGA-KIRP	TCGA-DW-7963-01	5.9286	1240	0
TCGA-KIPAN	TCGA-DW-7963-01	5.9286	1240	0
TCGA-DLBC	TCGA-FA-A7DS-01	7.8329	719	0
TCGA-BRCA	TCGA-E2-A1L9-01	7.1457	598	0
TCGA-BRCA	TCGA-AC-A23H-01	7.4136	174	1
TCGA-CESC	TCGA-EA-A3QD-01	6.9708	397	0
TCGA-BLCA	TCGA-E5-A4U1-01	7.4981	1181	0
TCGA-SARC	TCGA-DX-AB3C-01	7.0168	2169	0
TCGA-KIRC	TCGA-BP-4762-01	6.4868	1343	0
TCGA-KIPAN	TCGA-BP-4762-01	6.4868	1343	0
TCGA-BRCA	TCGA-AR-A1AP-01	7.3817	2856	0
TCGA-LGG	TCGA-KT-A7W1-01	7.9948	438	0
TCGA-GBMLGG	TCGA-KT-A7W1-01	7.9948	438	0
TCGA-LUAD	TCGA-44-3919-01	6.926	1026	1
TCGA-COAD	TCGA-AZ-6598-01	7.5278	1503	0
TCGA-COADREAD	TCGA-AZ-6598-01	7.5278	1503	0
TCGA-COAD	TCGA-A6-6653-01	8.06	742	0
TCGA-COADREAD	TCGA-A6-6653-01	8.06	742	0
TCGA-HNSC	TCGA-CV-6952-01	6.7801	185	0
TCGA-COAD	TCGA-NH-A50V-01	6.942	588	0
TCGA-COADREAD	TCGA-NH-A50V-01	6.942	588	0
TCGA-KIRC	TCGA-B0-5109-01	6.7855	587	1
TCGA-KIPAN	TCGA-B0-5109-01	6.7855	587	1
TCGA-BRCA	TCGA-BH-A0H5-01	6.8567	1620	0
TCGA-BRCA	TCGA-OK-A5Q2-01	7.3299	64	0
TCGA-UCEC	TCGA-B5-A0K9-01	7.2021	409	0
TCGA-HNSC	TCGA-CV-A45P-01	7.0916	639	0
TCGA-BRCA	TCGA-BH-A0E6-01	7.0052	293	0
TCGA-BRCA	TCGA-D8-A1JA-01	7.4163	502	0
TCGA-LUSC	TCGA-56-7221-01	7.6119	608	0
TCGA-COAD	TCGA-AD-6899-01	7.8374	176	0
TCGA-COADREAD	TCGA-AD-6899-01	7.8374	176	0
TCGA-CHOL	TCGA-4G-AAZT-01	6.6053	420	0
TCGA-ESCA	TCGA-VR-A8EX-01	7.7378	855	1
TCGA-STES	TCGA-VR-A8EX-01	7.7378	855	1
TCGA-LGG	TCGA-P5-A5F2-01	5.8405	242	0
TCGA-GBMLGG	TCGA-P5-A5F2-01	5.8405	242	0
TCGA-KIRC	TCGA-BP-4352-01	6.7768	344	1
TCGA-KIPAN	TCGA-BP-4352-01	6.7768	344	1
TCGA-LUAD	TCGA-99-8032-01	6.3797	44	0
TCGA-BRCA	TCGA-BH-A0BW-01	7.3593	2371	0
TCGA-KIRP	TCGA-DW-7841-01	6.9931	445	0
TCGA-KIPAN	TCGA-DW-7841-01	6.9931	445	0
TCGA-HNSC	TCGA-CV-A6JN-01	6.3156	906	0
TCGA-ACC	TCGA-OR-A5LN-01	5.7695	2342	0
TCGA-STAD	TCGA-CD-8528-01	8.9116	375	0
TCGA-STES	TCGA-CD-8528-01	8.9116	375	0
TCGA-THCA	TCGA-H2-A2K9-01	7.4081	659	0
TCGA-PRAD	TCGA-G9-7509-01	6.7922	1610	0
TCGA-PRAD	TCGA-J4-A67R-01	6.0193	910	0
TCGA-GBM	TCGA-19-2629-01	7.2713	737	1
TCGA-GBMLGG	TCGA-19-2629-01	7.2713	737	1
TCGA-DLBC	TCGA-GS-A9TT-01	8.0889	1163	0
TCGA-KIRC	TCGA-B2-4098-01	5.761	51	0
TCGA-KIPAN	TCGA-B2-4098-01	5.761	51	0
TCGA-STAD	TCGA-D7-8575-01	8.0936	554	1
TCGA-STES	TCGA-D7-8575-01	8.0936	554	1
TCGA-LGG	TCGA-HT-7607-01	5.1132	96	1
TCGA-GBMLGG	TCGA-HT-7607-01	5.1132	96	1
TCGA-HNSC	TCGA-CR-7380-01	8.1503	606	1
TCGA-LUSC	TCGA-43-2576-01	6.7961	1223	0
TCGA-THCA	TCGA-DJ-A2PW-01	6.8198	1060	0
TCGA-UCS	TCGA-N8-A56S-01	7.1341	371	1
TCGA-STAD	TCGA-BR-8367-01	8.0578	801	1
TCGA-STES	TCGA-BR-8367-01	8.0578	801	1
TCGA-CESC	TCGA-C5-A1ME-01	6.3887	1756	0
TCGA-GBM	TCGA-06-0238-01	5.8392	405	1
TCGA-GBMLGG	TCGA-06-0238-01	5.8392	405	1
TCGA-PRAD	TCGA-QU-A6IL-01	6.0948	97	0
TCGA-PAAD	TCGA-FB-AAQ3-01	5.8104	31	0
TCGA-SARC	TCGA-3B-A9HX-01	7.6986	1303	0
TCGA-KIRC	TCGA-CJ-5679-01	6.5233	679	1
TCGA-KIPAN	TCGA-CJ-5679-01	6.5233	679	1
TCGA-READ	TCGA-DC-6682-01	7.3149	762	0
TCGA-COADREAD	TCGA-DC-6682-01	7.3149	762	0
TCGA-PRAD	TCGA-V1-A9Z7-01	6.9901	874	0
TCGA-KICH	TCGA-KL-8346-01	6.1912	1897	0
TCGA-KIPAN	TCGA-KL-8346-01	6.1912	1897	0
TCGA-STAD	TCGA-VQ-A91Q-01	7.7429	633	1
TCGA-STES	TCGA-VQ-A91Q-01	7.7429	633	1
TCGA-THCA	TCGA-FE-A239-01	7.1401	1023	1
TCGA-HNSC	TCGA-DQ-7594-01	7.4516	1218	0
TCGA-BLCA	TCGA-XF-A8HF-01	6.5155	2954	0
TCGA-BLCA	TCGA-KQ-A41P-01	6.9631	1094	0
TCGA-KIRC	TCGA-BP-4766-01	7.3335	1462	0
TCGA-KIPAN	TCGA-BP-4766-01	7.3335	1462	0
TCGA-LIHC	TCGA-DD-AACT-01	5.9939	1562	0
TCGA-BLCA	TCGA-BL-A13I-01	7.0127	223	1
TCGA-SARC	TCGA-DX-A7EU-01	6.7253	721	0
TCGA-BRCA	TCGA-B6-A0WZ-01	7.1243	6292	0
TCGA-BRCA	TCGA-C8-A135-01	6.8515	393	0
TCGA-THYM	TCGA-XU-A92W-01	7.747	3279	0
TCGA-LUAD	TCGA-55-8299-01	7.0364	469	1
TCGA-LUSC	TCGA-39-5027-01	7.0576	3108	0
TCGA-HNSC	TCGA-HD-7917-01	7.1404	836	0
TCGA-OV	TCGA-09-1674-01	8.4846	260	0
TCGA-LUSC	TCGA-22-5485-01	7.9596	916	1
TCGA-THCA	TCGA-EL-A4K1-01	5.9962	1046	0
TCGA-BRCA	TCGA-BH-A0E2-01	7.4831	435	0
TCGA-THCA	TCGA-DJ-A2PX-01	6.573	881	0
TCGA-BRCA	TCGA-BH-A0BJ-01	7.4289	660	0
TCGA-BRCA	TCGA-BH-A203-01	6.8691	1174	1
TCGA-THCA	TCGA-BJ-A190-01	6.9052	626	0
TCGA-THCA	TCGA-DJ-A3VM-01	6.7938	840	0
TCGA-BRCA	TCGA-A2-A1G1-01	7.5516	584	0
TCGA-KIRP	TCGA-GL-A9DD-01	6.274	341	0
TCGA-KIPAN	TCGA-GL-A9DD-01	6.274	341	0
TCGA-OV	TCGA-13-A5FT-01	7.1336	2143	0
TCGA-PAAD	TCGA-IB-AAUW-01	6.8125	230	1
TCGA-PCPG	TCGA-WB-A81M-01	7.1324	1394	0
TCGA-LGG	TCGA-HT-7873-01	7.3039	718	0
TCGA-GBMLGG	TCGA-HT-7873-01	7.3039	718	0
TCGA-KIRC	TCGA-BP-5183-01	7.1965	1291	0
TCGA-KIPAN	TCGA-BP-5183-01	7.1965	1291	0
TCGA-LUAD	TCGA-55-A491-01	6.9737	626	0
TCGA-THCA	TCGA-FY-A3NM-01	7.2257	885	0
TCGA-GBM	TCGA-06-0749-01	5.6899	82	1
TCGA-GBMLGG	TCGA-06-0749-01	5.6899	82	1
TCGA-SKCM-M	TCGA-D3-A3CE-06	7.3756	1832	1
TCGA-SKCM	TCGA-D3-A3CE-06	7.3756	1832	1
TCGA-LUSC	TCGA-46-6025-01	7.2745	324	0
TCGA-THCA	TCGA-FE-A236-01	6.7721	2031	0
TCGA-BLCA	TCGA-ZF-AA4W-01	7.3817	1830	0
TCGA-BLCA	TCGA-UY-A9PA-01	7.3344	1072	0
TCGA-KICH	TCGA-KL-8330-01	6.7399	3304	0
TCGA-KIPAN	TCGA-KL-8330-01	6.7399	3304	0
TCGA-THCA	TCGA-ET-A3DP-01	7.276	2877	0
TCGA-LGG	TCGA-HT-7603-01	4.4409	705	0
TCGA-GBMLGG	TCGA-HT-7603-01	4.4409	705	0
TCGA-UCEC	TCGA-AJ-A3NF-01	7.2505	645	0
TCGA-THYM	TCGA-4V-A9QT-01	7.4987	813	0
TCGA-PRAD	TCGA-HC-7752-01	5.4653	782	0
TCGA-CESC	TCGA-FU-A40J-01	7.1929	426	0
TCGA-KIRP	TCGA-B9-4116-01	7.6328	627	0
TCGA-KIPAN	TCGA-B9-4116-01	7.6328	627	0
TCGA-BRCA	TCGA-BH-A0C7-01	8.0435	2767	0
TCGA-LUAD	TCGA-50-6595-01	7.3867	189	1
TCGA-LGG	TCGA-DB-A64P-01	6.0588	916	0
TCGA-GBMLGG	TCGA-DB-A64P-01	6.0588	916	0
TCGA-KIRC	TCGA-BP-4981-01	6.2421	1097	0
TCGA-KIPAN	TCGA-BP-4981-01	6.2421	1097	0
TCGA-CESC	TCGA-VS-A9V5-01	6.837	494	1
TCGA-KIRC	TCGA-AK-3428-01	6.4167	3728	0
TCGA-KIPAN	TCGA-AK-3428-01	6.4167	3728	0
TCGA-BRCA	TCGA-E2-A14X-01	6.9645	972	0
TCGA-COAD	TCGA-G4-6311-01	7.8102	1199	0
TCGA-COADREAD	TCGA-G4-6311-01	7.8102	1199	0
TCGA-BRCA	TCGA-BH-A8FZ-01	7.2023	574	0
TCGA-BRCA	TCGA-S3-AA17-01	7.1633	424	0
TCGA-UCEC	TCGA-DF-A2L0-01	5.9208	788	1
TCGA-READ	TCGA-CI-6619-01	7.4838	184	0
TCGA-COADREAD	TCGA-CI-6619-01	7.4838	184	0
TCGA-STAD	TCGA-B7-A5TI-01	7.5548	595	0
TCGA-STES	TCGA-B7-A5TI-01	7.5548	595	0
TCGA-BRCA	TCGA-AR-A1AR-01	7.6639	524	1
TCGA-BRCA	TCGA-D8-A13Z-01	7.7949	635	0
TCGA-HNSC	TCGA-BA-5152-01	6.8033	1288	0
TCGA-CESC	TCGA-MY-A913-01	7.4426	524	0
TCGA-DLBC	TCGA-G8-6325-01	6.4471	1581	0
TCGA-SKCM-M	TCGA-ER-A19M-06	6.9158	1857	1
TCGA-SKCM	TCGA-ER-A19M-06	6.9158	1857	1
TCGA-KIRP	TCGA-A4-7997-01	6.9765	927	0
TCGA-KIPAN	TCGA-A4-7997-01	6.9765	927	0
TCGA-ESCA	TCGA-L5-A88T-01	7.7569	694	0
TCGA-STES	TCGA-L5-A88T-01	7.7569	694	0
TCGA-SARC	TCGA-DX-A48O-01	6.5591	1605	0
TCGA-OV	TCGA-13-1512-01	7.336	442	0
TCGA-OV	TCGA-23-2078-01	7.4097	2661	0
TCGA-BRCA	TCGA-A7-A6VX-01	7.4817	317	0
TCGA-CESC	TCGA-VS-A8Q9-01	7.5784	1630	0
TCGA-LIHC	TCGA-DD-A39V-01	5.498	643	1
TCGA-PRAD	TCGA-EJ-A65F-01	6.9664	560	0
TCGA-LUAD	TCGA-95-A4VP-01	6.7211	605	0
TCGA-KIRC	TCGA-BP-4340-01	6.8376	562	0
TCGA-KIPAN	TCGA-BP-4340-01	6.8376	562	0
TCGA-SKCM-M	TCGA-EE-A3AF-06	7.3135	420	1
TCGA-SKCM	TCGA-EE-A3AF-06	7.3135	420	1
TCGA-PRAD	TCGA-HC-8261-01	5.6848	546	0
TCGA-UCEC	TCGA-AX-A3G3-01	6.3875	42	0
TCGA-LUSC	TCGA-85-A512-01	7.2868	465	0
TCGA-THCA	TCGA-ET-A25P-01	7.434	559	0
TCGA-THCA	TCGA-DJ-A3VI-01	6.6092	95	0
TCGA-LUAD	TCGA-55-8302-01	6.8971	478	0
TCGA-LUAD	TCGA-44-4112-01	5.3564	808	1
TCGA-LUSC	TCGA-60-2710-01	8.2531	2024	0
TCGA-READ	TCGA-AF-3911-01	7.6062	1148	0
TCGA-COADREAD	TCGA-AF-3911-01	7.6062	1148	0
TCGA-HNSC	TCGA-UF-A7JJ-01	6.6911	549	0
TCGA-LUAD	TCGA-05-4430-01	6.7714	761	0
TCGA-BRCA	TCGA-AR-A255-01	7.5699	2161	0
TCGA-PCPG	TCGA-WB-A81F-01	7.1353	1737	0
TCGA-UVM	TCGA-V4-A9EQ-01	7.2384	455	1
TCGA-PAAD	TCGA-HZ-7919-01	7.3495	593	1
TCGA-HNSC	TCGA-CN-5366-01	7.1844	360	1
TCGA-BLCA	TCGA-E5-A2PC-01	7.27	1326	0
TCGA-BRCA	TCGA-A2-A0CU-01	7.3673	158	0
TCGA-KIRP	TCGA-V9-A7HT-01	6.783	965	0
TCGA-KIPAN	TCGA-V9-A7HT-01	6.783	965	0
TCGA-PRAD	TCGA-YL-A8HM-01	6.8169	1482	0
TCGA-STAD	TCGA-CD-A486-01	6.5519	192	1
TCGA-STES	TCGA-CD-A486-01	6.5519	192	1
TCGA-SKCM-M	TCGA-DA-A95Y-06	7.3707	430	1
TCGA-SKCM	TCGA-DA-A95Y-06	7.3707	430	1
TCGA-BLCA	TCGA-UY-A9PE-01	7.0559	189	0
TCGA-HNSC	TCGA-CQ-7071-01	6.4726	1311	0
TCGA-UCEC	TCGA-D1-A3DG-01	7.3533	130	0
TCGA-STAD	TCGA-VQ-A8PX-01	7.7592	1964	0
TCGA-STES	TCGA-VQ-A8PX-01	7.7592	1964	0
TCGA-BLCA	TCGA-XF-A9SV-01	7.1592	388	1
TCGA-OV	TCGA-24-1924-01	6.637	919	1
TCGA-KIRC	TCGA-B0-5120-01	6.5614	1169	0
TCGA-KIPAN	TCGA-B0-5120-01	6.5614	1169	0
TCGA-SARC	TCGA-DX-A6BG-01	7.1318	1121	0
TCGA-BRCA	TCGA-BH-A0AZ-01	7.3145	1919	0
TCGA-BLCA	TCGA-E7-A6MF-01	7.4506	750	0
TCGA-KIRC	TCGA-MM-A84U-01	6.4031	700	0
TCGA-KIPAN	TCGA-MM-A84U-01	6.4031	700	0
TCGA-HNSC	TCGA-CV-6933-01	7.0025	2741	0
TCGA-ESCA	TCGA-LN-A8HZ-01	8.2245	375	0
TCGA-STES	TCGA-LN-A8HZ-01	8.2245	375	0
TCGA-CESC	TCGA-DS-A0VL-01	7.7611	81	0
TCGA-LUSC	TCGA-63-6202-01	7.1524	1602	0
TCGA-TGCT	TCGA-SB-A76C-01	8.4509	42	0
TCGA-SKCM-M	TCGA-FS-A1YY-06	7.5928	6953	1
TCGA-SKCM	TCGA-FS-A1YY-06	7.5928	6953	1
TCGA-LUSC	TCGA-46-3767-01	6.4555	396	0
TCGA-BRCA	TCGA-E2-A1IH-01	6.8044	1026	0
TCGA-KIRC	TCGA-B0-5095-01	7.134	245	0
TCGA-KIPAN	TCGA-B0-5095-01	7.134	245	0
TCGA-GBM	TCGA-06-0174-01	7.0276	98	1
TCGA-GBMLGG	TCGA-06-0174-01	7.0276	98	1
TCGA-READ	TCGA-CI-6622-01	7.4225	1362	0
TCGA-COADREAD	TCGA-CI-6622-01	7.4225	1362	0
TCGA-KIRC	TCGA-BP-4167-01	6.1555	2718	0
TCGA-KIPAN	TCGA-BP-4167-01	6.1555	2718	0
TCGA-LGG	TCGA-HW-7486-01	5.6049	1721	0
TCGA-GBMLGG	TCGA-HW-7486-01	5.6049	1721	0
TCGA-LIHC	TCGA-ZP-A9D2-01	7.3374	765	1
TCGA-BRCA	TCGA-BH-A18R-01	7.5792	1142	0
TCGA-HNSC	TCGA-BA-7269-01	6.1713	1273	0
TCGA-BLCA	TCGA-ZF-AA56-01	7.3015	259	1
TCGA-STAD	TCGA-HU-A4G3-01	6.6642	170	0
TCGA-STES	TCGA-HU-A4G3-01	6.6642	170	0
TCGA-ACC	TCGA-OR-A5KY-01	6.8158	391	1
TCGA-SKCM-M	TCGA-ER-A19A-06	7.2797	2365	0
TCGA-SKCM	TCGA-ER-A19A-06	7.2797	2365	0
TCGA-COAD	TCGA-NH-A6GC-01	7.0996	389	0
TCGA-COADREAD	TCGA-NH-A6GC-01	7.0996	389	0
TCGA-SARC	TCGA-DX-A48K-01	7.3128	1399	0
TCGA-LIHC	TCGA-DD-A73B-01	6.361	283	1
TCGA-BRCA	TCGA-AC-A4ZE-01	7.6116	890	0
TCGA-LGG	TCGA-P5-A5F1-01	6.0492	179	0
TCGA-GBMLGG	TCGA-P5-A5F1-01	6.0492	179	0
TCGA-BLCA	TCGA-DK-AA6X-01	6.8942	467	0
TCGA-STAD	TCGA-BR-7722-01	7.0407	466	0
TCGA-STES	TCGA-BR-7722-01	7.0407	466	0
TCGA-BRCA	TCGA-B6-A0RS-01	6.6518	3063	1
TCGA-LUSC	TCGA-33-AAS8-01	7.7235	1114	0
TCGA-BRCA	TCGA-AR-A24H-01	7.9714	4894	0
TCGA-COAD	TCGA-F4-6570-01	7.5699	188	0
TCGA-COADREAD	TCGA-F4-6570-01	7.5699	188	0
TCGA-THCA	TCGA-E8-A432-01	7.0207	931	0
TCGA-OV	TCGA-24-1928-01	7.4269	336	1
TCGA-LGG	TCGA-DU-7011-01	5.3413	3200	1
TCGA-GBMLGG	TCGA-DU-7011-01	5.3413	3200	1
TCGA-COAD	TCGA-G4-6627-01	7.0198	2275	0
TCGA-COADREAD	TCGA-G4-6627-01	7.0198	2275	0
TCGA-PRAD	TCGA-J9-A8CP-01	6.6823	386	0
TCGA-BLCA	TCGA-ZF-A9R9-01	6.5821	864	1
TCGA-PCPG	TCGA-P8-A6RX-01	7.0249	540	0
TCGA-HNSC	TCGA-UF-A7JF-01	6.6074	1686	0
TCGA-BRCA	TCGA-A8-A099-01	7.5497	304	0
TCGA-COAD	TCGA-CM-6679-01	7.1472	306	0
TCGA-COADREAD	TCGA-CM-6679-01	7.1472	306	0
TCGA-DLBC	TCGA-G8-6907-01	6.202	595	1
TCGA-PAAD	TCGA-HV-A5A4-01	7.0893	232	0
TCGA-READ	TCGA-DC-6157-01	7.6989	1581	0
TCGA-COADREAD	TCGA-DC-6157-01	7.6989	1581	0
TCGA-CESC	TCGA-VS-A9UU-01	7.3362	442	0
TCGA-LUSC	TCGA-66-2790-01	6.981	699	0
TCGA-LUAD	TCGA-75-7027-01	7.322	3059	0
TCGA-PRAD	TCGA-V1-A8WS-01	6.9656	474	0
TCGA-THCA	TCGA-CE-A3MD-01	6.837	389	0
TCGA-STAD	TCGA-HU-A4GD-01	7.2643	692	0
TCGA-STES	TCGA-HU-A4GD-01	7.2643	692	0
TCGA-STAD	TCGA-VQ-A94U-01	7.3258	819	0
TCGA-STES	TCGA-VQ-A94U-01	7.3258	819	0
TCGA-MESO	TCGA-LK-A4O0-01	7.2379	185	0
TCGA-PAAD	TCGA-XD-AAUG-01	6.726	420	0
TCGA-LIHC	TCGA-FV-A4ZP-01	5.8625	2486	0
TCGA-KICH	TCGA-KN-8435-01	6.58	3498	0
TCGA-KIPAN	TCGA-KN-8435-01	6.58	3498	0
TCGA-COAD	TCGA-A6-4105-01	7.7441	442	0
TCGA-COADREAD	TCGA-A6-4105-01	7.7441	442	0
TCGA-OV	TCGA-04-1514-01	7.0398	1720	0
TCGA-LGG	TCGA-P5-A77X-01	5.1305	105	0
TCGA-GBMLGG	TCGA-P5-A77X-01	5.1305	105	0
TCGA-LUSC	TCGA-NC-A5HI-01	7.5479	1743	0
TCGA-KIRC	TCGA-BP-4781-01	6.9225	2080	0
TCGA-KIPAN	TCGA-BP-4781-01	6.9225	2080	0
TCGA-HNSC	TCGA-CV-6937-01	7.044	624	0
TCGA-UCEC	TCGA-AJ-A3QS-01	7.1114	513	0
TCGA-LIHC	TCGA-DD-AACS-01	6.7227	1804	0
TCGA-CESC	TCGA-VS-A9U6-01	7.4429	1320	0
TCGA-SKCM-P	TCGA-EB-A6QZ-01	7.3742	352	1
TCGA-SKCM	TCGA-EB-A6QZ-01	7.3742	352	1
TCGA-HNSC	TCGA-IQ-7631-01	6.1595	1172	0
TCGA-ESCA	TCGA-L5-A4OI-01	8.411	608	0
TCGA-STES	TCGA-L5-A4OI-01	8.411	608	0
TCGA-SKCM-P	TCGA-EB-A1NK-01	6.8132	1039	0
TCGA-SKCM	TCGA-EB-A1NK-01	6.8132	1039	0
TCGA-SKCM-M	TCGA-D3-A8GQ-06	6.9796	884	1
TCGA-SKCM	TCGA-D3-A8GQ-06	6.9796	884	1
TCGA-BRCA	TCGA-A8-A09R-01	7.8332	273	0
TCGA-BLCA	TCGA-DK-AA6S-01	6.9391	5050	0
TCGA-PRAD	TCGA-V1-A9Z8-01	6.7937	827	0
TCGA-LIHC	TCGA-DD-A4NK-01	6.4438	1210	1
TCGA-THYM	TCGA-3S-A8YW-01	7.0561	643	0
TCGA-STAD	TCGA-VQ-A8PJ-01	7.9843	82	1
TCGA-STES	TCGA-VQ-A8PJ-01	7.9843	82	1
TCGA-BLCA	TCGA-KQ-A41S-01	6.9345	35	0
TCGA-LUAD	TCGA-44-2668-01	6.5313	761	1
TCGA-LUAD	TCGA-55-8507-01	7.2664	418	0
TCGA-THCA	TCGA-DJ-A3UN-01	6.908	986	0
TCGA-LGG	TCGA-HW-7493-01	5.9873	2107	0
TCGA-GBMLGG	TCGA-HW-7493-01	5.9873	2107	0
TCGA-LIHC	TCGA-CC-5261-01	7.5845	97	0
TCGA-CESC	TCGA-C5-A2LX-01	6.5976	2526	0
TCGA-HNSC	TCGA-CR-6471-01	7.9166	1202	1
TCGA-LGG	TCGA-VM-A8CA-01	5.2307	411	0
TCGA-GBMLGG	TCGA-VM-A8CA-01	5.2307	411	0
TCGA-BRCA	TCGA-EW-A6SC-01	7.6274	952	0
TCGA-KIRC	TCGA-B0-5699-01	7.2257	3841	0
TCGA-KIPAN	TCGA-B0-5699-01	7.2257	3841	0
TCGA-PRAD	TCGA-XQ-A8TB-01	7.0228	770	0
TCGA-LUSC	TCGA-37-5819-01	6.4728	103	0
TCGA-LGG	TCGA-DU-7015-01	6.1532	2761	0
TCGA-GBMLGG	TCGA-DU-7015-01	6.1532	2761	0
TCGA-CESC	TCGA-C5-A1M8-01	7.1532	919	0
TCGA-CESC	TCGA-C5-A7CJ-01	7.6483	3097	0
TCGA-LUSC	TCGA-22-A5C4-01	7.3524	671	0
TCGA-SARC	TCGA-HB-A2OT-01	6.7896	2057	0
TCGA-LUSC	TCGA-85-A4CL-01	6.7932	921	0
TCGA-LGG	TCGA-TM-A7C5-01	5.5868	1500	0
TCGA-GBMLGG	TCGA-TM-A7C5-01	5.5868	1500	0
TCGA-SARC	TCGA-DX-A3UB-01	7.1667	2247	0
TCGA-KIRC	TCGA-BP-4801-01	6.826	1124	0
TCGA-KIPAN	TCGA-BP-4801-01	6.826	1124	0
TCGA-BRCA	TCGA-D8-A1XC-01	7.2352	377	1
TCGA-LGG	TCGA-DU-8162-01	5.4884	444	1
TCGA-GBMLGG	TCGA-DU-8162-01	5.4884	444	1
TCGA-LGG	TCGA-TM-A84O-01	6.2166	1011	1
TCGA-GBMLGG	TCGA-TM-A84O-01	6.2166	1011	1
TCGA-GBM	TCGA-06-5410-01	5.8435	108	1
TCGA-GBMLGG	TCGA-06-5410-01	5.8435	108	1
TCGA-READ	TCGA-DC-6158-01	7.7572	334	0
TCGA-COADREAD	TCGA-DC-6158-01	7.7572	334	0
TCGA-SKCM-M	TCGA-FW-A3TU-06	6.6489	1691	1
TCGA-SKCM	TCGA-FW-A3TU-06	6.6489	1691	1
TCGA-LUAD	TCGA-69-8254-01	7.0081	409	0
TCGA-THYM	TCGA-3T-AA9L-01	7.2338	1050	0
TCGA-PRAD	TCGA-HC-A6HY-01	6.7074	134	0
TCGA-THCA	TCGA-EM-A3FM-01	6.9305	639	0
TCGA-CESC	TCGA-GH-A9DA-01	8.1042	540	0
TCGA-HNSC	TCGA-TN-A7HL-01	7.0545	619	0
TCGA-SARC	TCGA-3B-A9HT-01	7.3447	1665	0
TCGA-HNSC	TCGA-CN-4742-01	7.7821	397	1
TCGA-OV	TCGA-04-1348-01	7.7323	1483	1
TCGA-STAD	TCGA-RD-A8N6-01	7.2892	272	1
TCGA-STES	TCGA-RD-A8N6-01	7.2892	272	1
TCGA-LIHC	TCGA-DD-AACX-01	6.337	170	0
TCGA-LUAD	TCGA-78-8640-01	7.3637	7062	0
TCGA-THCA	TCGA-DJ-A3UY-01	6.926	1091	0
TCGA-BRCA	TCGA-EW-A1PE-01	7.7009	320	0
TCGA-LUAD	TCGA-69-7979-01	7.3607	408	0
TCGA-BRCA	TCGA-E2-A1II-01	7.2703	1025	0
TCGA-BRCA	TCGA-S3-AA14-01	7.5768	529	0
TCGA-HNSC	TCGA-CR-7392-01	7.3442	1425	0
TCGA-LGG	TCGA-S9-A7R3-01	5.8145	3013	0
TCGA-GBMLGG	TCGA-S9-A7R3-01	5.8145	3013	0
TCGA-BRCA	TCGA-A8-A09B-01	7.3067	365	0
TCGA-LUSC	TCGA-60-2714-01	7.0612	1531	0
TCGA-SKCM-M	TCGA-GN-A9SD-06	6.7208	1807	1
TCGA-SKCM	TCGA-GN-A9SD-06	6.7208	1807	1
TCGA-TGCT	TCGA-2G-AAFO-01	7.3455	685	0
TCGA-BRCA	TCGA-AR-A5QP-01	7.0442	1185	0
TCGA-UCS	TCGA-NF-A4WX-01	6.8907	452	0
TCGA-LIHC	TCGA-DD-AAE0-01	6.8546	555	0
TCGA-BRCA	TCGA-E9-A6HE-01	6.9879	847	0
TCGA-STAD	TCGA-BR-8291-01	7.4795	607	0
TCGA-STES	TCGA-BR-8291-01	7.4795	607	0
TCGA-LIHC	TCGA-DD-AADA-01	5.9791	1233	0
TCGA-LGG	TCGA-TQ-A7RN-01	6.0367	1026	0
TCGA-GBMLGG	TCGA-TQ-A7RN-01	6.0367	1026	0
TCGA-TGCT	TCGA-ZM-AA0B-01	7.5093	838	0
TCGA-KIRP	TCGA-GL-A9DE-01	6.4472	496	0
TCGA-KIPAN	TCGA-GL-A9DE-01	6.4472	496	0
TCGA-PAAD	TCGA-2J-AABI-01	6.7097	969	0
TCGA-BRCA	TCGA-BH-A0HI-01	7.2275	620	0
TCGA-TGCT	TCGA-XE-AANI-01	7.3402	1041	0
TCGA-THCA	TCGA-ET-A3DT-01	6.3717	1330	0
TCGA-LIHC	TCGA-DD-A1EI-01	6.055	183	0
TCGA-KIRC	TCGA-BP-4790-01	7.1906	1111	0
TCGA-KIPAN	TCGA-BP-4790-01	7.1906	1111	0
TCGA-KIRC	TCGA-BP-5008-01	7.0526	1071	0
TCGA-KIPAN	TCGA-BP-5008-01	7.0526	1071	0
TCGA-KIRC	TCGA-BP-4170-01	6.9279	2343	0
TCGA-KIPAN	TCGA-BP-4170-01	6.9279	2343	0
TCGA-UCEC	TCGA-AJ-A3BK-01	7.0309	1031	0
TCGA-OV	TCGA-04-1530-01	6.5241	3622	1
TCGA-SKCM-M	TCGA-FS-A4FC-06	7.2373	1655	1
TCGA-SKCM	TCGA-FS-A4FC-06	7.2373	1655	1
TCGA-HNSC	TCGA-CR-6480-01	8.3728	362	0
TCGA-THCA	TCGA-EL-A3D1-01	6.4224	2997	0
TCGA-HNSC	TCGA-CV-6942-01	7.0375	4282	0
TCGA-COAD	TCGA-D5-6924-01	7.7842	435	0
TCGA-COADREAD	TCGA-D5-6924-01	7.7842	435	0
TCGA-GBM	TCGA-28-2513-01	6.6085	222	0
TCGA-GBMLGG	TCGA-28-2513-01	6.6085	222	0
TCGA-BRCA	TCGA-EW-A1P1-01	7.1451	1210	0
TCGA-LIHC	TCGA-BC-A5W4-01	6.1841	547	0
TCGA-LUSC	TCGA-39-5019-01	6.6876	3387	0
TCGA-UCEC	TCGA-JU-AAVI-01	6.8561	540	1
TCGA-PCPG	TCGA-QR-A70R-01	6.7173	432	0
TCGA-BRCA	TCGA-OL-A66P-01	5.6979	428	0
TCGA-UCS	TCGA-NG-A4VW-01	7.8021	949	1
TCGA-SKCM-M	TCGA-EE-A3JA-06	6.1951	1618	1
TCGA-SKCM	TCGA-EE-A3JA-06	6.1951	1618	1
TCGA-BRCA	TCGA-A2-A1G4-01	7.7176	595	0
TCGA-BRCA	TCGA-E2-A105-01	7.7259	1308	0
TCGA-LUAD	TCGA-55-7573-01	6.9799	487	0
TCGA-PCPG	TCGA-WB-A80M-01	6.5613	136	0
TCGA-ESCA	TCGA-L5-A4OR-01	8.3386	96	0
TCGA-STES	TCGA-L5-A4OR-01	8.3386	96	0
TCGA-OV	TCGA-25-2042-01	7.6529	396	1
TCGA-HNSC	TCGA-CV-A45W-01	6.9345	1398	0
TCGA-BRCA	TCGA-E2-A573-01	6.5188	1062	0
TCGA-KIRC	TCGA-B0-5085-01	6.2006	770	0
TCGA-KIPAN	TCGA-B0-5085-01	6.2006	770	0
TCGA-LGG	TCGA-DU-A6S6-01	5.9903	2893	0
TCGA-GBMLGG	TCGA-DU-A6S6-01	5.9903	2893	0
TCGA-TGCT	TCGA-YU-AA61-01	7.9374	864	0
TCGA-KIRC	TCGA-DV-A4W0-01	6.9689	2470	0
TCGA-KIPAN	TCGA-DV-A4W0-01	6.9689	2470	0
TCGA-COAD	TCGA-AD-6965-01	8.0581	805	0
TCGA-COADREAD	TCGA-AD-6965-01	8.0581	805	0
TCGA-THCA	TCGA-BJ-A3PR-01	6.5775	1107	0
TCGA-MESO	TCGA-SH-A7BD-01	6.2683	459	1
TCGA-THCA	TCGA-H2-A422-01	7.0871	566	0
TCGA-UCEC	TCGA-EY-A549-01	6.6521	605	0
TCGA-SARC	TCGA-DX-A6YU-01	6.8578	1045	0
TCGA-LGG	TCGA-P5-A735-01	6.1426	292	0
TCGA-GBMLGG	TCGA-P5-A735-01	6.1426	292	0
TCGA-STAD	TCGA-VQ-A928-01	8.0911	174	1
TCGA-STES	TCGA-VQ-A928-01	8.0911	174	1
TCGA-COAD	TCGA-D5-6931-01	8.2086	365	0
TCGA-COADREAD	TCGA-D5-6931-01	8.2086	365	0
TCGA-SARC	TCGA-DX-A6Z2-01	6.8741	3079	0
TCGA-LIHC	TCGA-BC-A10T-01	5.7052	837	1
TCGA-CESC	TCGA-EA-A5O9-01	7.4681	788	0
TCGA-LUSC	TCGA-43-5668-01	6.7754	559	1
TCGA-PAAD	TCGA-FB-AAQ0-01	6.9825	473	0
TCGA-SKCM-P	TCGA-BF-AAP1-01	7.2686	409	0
TCGA-SKCM	TCGA-BF-AAP1-01	7.2686	409	0
TCGA-BRCA	TCGA-A2-A0EV-01	7.5742	968	0
TCGA-OV	TCGA-31-1950-01	6.812	571	0
TCGA-LUSC	TCGA-18-4083-01	7.6694	188	0
TCGA-LGG	TCGA-FG-A6J1-01	5.557	500	0
TCGA-GBMLGG	TCGA-FG-A6J1-01	5.557	500	0
TCGA-LGG	TCGA-S9-A7R7-01	6.5382	3000	0
TCGA-GBMLGG	TCGA-S9-A7R7-01	6.5382	3000	0
TCGA-STAD	TCGA-CD-8526-01	8.2987	381	0
TCGA-STES	TCGA-CD-8526-01	8.2987	381	0
TCGA-STAD	TCGA-BR-7703-01	7.2901	1100	0
TCGA-STES	TCGA-BR-7703-01	7.2901	1100	0
TCGA-KIRP	TCGA-AL-3471-01	6.6613	1500	0
TCGA-KIPAN	TCGA-AL-3471-01	6.6613	1500	0
TCGA-TGCT	TCGA-2G-AAH0-01	8.3293	5477	0
TCGA-THYM	TCGA-YT-A95D-01	7.4058	750	0
TCGA-BRCA	TCGA-E9-A1RG-01	7.0935	647	0
TCGA-BLCA	TCGA-YF-AA3M-01	7.5979	415	0
TCGA-GBM	TCGA-76-4929-01	6.1436	111	1
TCGA-GBMLGG	TCGA-76-4929-01	6.1436	111	1
TCGA-OV	TCGA-24-1413-01	6.8535	192	0
TCGA-SKCM-M	TCGA-EE-A2MU-06	7.1424	1620	0
TCGA-SKCM	TCGA-EE-A2MU-06	7.1424	1620	0
TCGA-TGCT	TCGA-SN-A84W-01	7.934	293	0
TCGA-COAD	TCGA-A6-5656-01	6.2635	1001	0
TCGA-COADREAD	TCGA-A6-5656-01	6.2635	1001	0
TCGA-LUSC	TCGA-43-8115-01	7.2173	407	0
TCGA-PAAD	TCGA-3A-A9IX-01	6.5441	1037	0
TCGA-READ	TCGA-EI-6884-01	7.7149	328	0
TCGA-COADREAD	TCGA-EI-6884-01	7.7149	328	0
TCGA-LGG	TCGA-DU-6402-01	7.5061	214	1
TCGA-GBMLGG	TCGA-DU-6402-01	7.5061	214	1
TCGA-CESC	TCGA-Q1-A73P-01	6.9715	483	0
TCGA-UVM	TCGA-V4-A9EI-01	7.1677	389	1
TCGA-LGG	TCGA-HT-7684-01	5.0742	184	0
TCGA-GBMLGG	TCGA-HT-7684-01	5.0742	184	0
TCGA-BRCA	TCGA-D8-A1XL-01	6.7879	606	0
TCGA-SKCM-M	TCGA-ER-A3EV-06	7.302	1429	1
TCGA-SKCM	TCGA-ER-A3EV-06	7.302	1429	1
TCGA-THCA	TCGA-E8-A413-01	6.864	912	0
TCGA-HNSC	TCGA-BA-6871-01	7.6294	108	1
TCGA-LGG	TCGA-HT-8104-01	7.1044	372	0
TCGA-GBMLGG	TCGA-HT-8104-01	7.1044	372	0
TCGA-HNSC	TCGA-CN-6017-01	6.7928	853	0
TCGA-LIHC	TCGA-CC-A7IH-01	6.6249	365	0
TCGA-STAD	TCGA-D7-A747-01	6.2315	255	1
TCGA-STES	TCGA-D7-A747-01	6.2315	255	1
TCGA-KIRP	TCGA-A4-7585-01	6.0181	1070	0
TCGA-KIPAN	TCGA-A4-7585-01	6.0181	1070	0
TCGA-PAAD	TCGA-3A-A9IO-01	6.4678	1942	0
TCGA-LIHC	TCGA-DD-A4NG-01	5.7821	802	1
TCGA-KIRC	TCGA-BP-5170-01	6.4497	2412	0
TCGA-KIPAN	TCGA-BP-5170-01	6.4497	2412	0
TCGA-LGG	TCGA-FN-7833-01	6.3118	837	0
TCGA-GBMLGG	TCGA-FN-7833-01	6.3118	837	0
TCGA-KICH	TCGA-KN-8436-01	6.6503	1288	0
TCGA-KIPAN	TCGA-KN-8436-01	6.6503	1288	0
TCGA-CESC	TCGA-C5-A8XK-01	7.2592	3039	0
TCGA-LUSC	TCGA-43-A474-01	7.7219	353	0
TCGA-LGG	TCGA-HT-7473-01	6.2655	503	0
TCGA-GBMLGG	TCGA-HT-7473-01	6.2655	503	0
TCGA-GBM	TCGA-06-0645-01	6.687	175	1
TCGA-GBMLGG	TCGA-06-0645-01	6.687	175	1
TCGA-LUSC	TCGA-33-AASI-01	6.9583	1344	1
TCGA-KIRP	TCGA-UZ-A9PV-01	7.185	1444	0
TCGA-KIPAN	TCGA-UZ-A9PV-01	7.185	1444	0
TCGA-THCA	TCGA-BJ-A2N9-01	6.3462	623	0
TCGA-SKCM-M	TCGA-EE-A2M5-06	8.1429	659	1
TCGA-SKCM	TCGA-EE-A2M5-06	8.1429	659	1
TCGA-BLCA	TCGA-CF-A7I0-01	7.0882	368	0
TCGA-OV	TCGA-25-1625-01	6.97	840	1
TCGA-LIHC	TCGA-WJ-A86L-01	6.3093	345	0
TCGA-SARC	TCGA-DX-AB2X-01	7.1966	404	1
TCGA-PRAD	TCGA-HC-A632-01	6.8544	61	0
TCGA-SARC	TCGA-MJ-A850-01	6.9272	681	0
TCGA-CESC	TCGA-C5-A907-01	7.4021	448	0
TCGA-LGG	TCGA-HT-8019-01	3.9874	1004	0
TCGA-GBMLGG	TCGA-HT-8019-01	3.9874	1004	0
TCGA-KIRP	TCGA-BQ-5877-01	7.4657	270	1
TCGA-KIPAN	TCGA-BQ-5877-01	7.4657	270	1
TCGA-STAD	TCGA-BR-6564-01	6.4431	794	0
TCGA-STES	TCGA-BR-6564-01	6.4431	794	0
TCGA-KIRC	TCGA-B2-5633-01	5.9467	963	0
TCGA-KIPAN	TCGA-B2-5633-01	5.9467	963	0
TCGA-PRAD	TCGA-G9-6353-01	6.4204	1542	0
TCGA-BRCA	TCGA-A2-A0ER-01	7.3748	2263	0
TCGA-ESCA	TCGA-IG-A8O2-01	7.6902	142	0
TCGA-STES	TCGA-IG-A8O2-01	7.6902	142	0
TCGA-CESC	TCGA-VS-A9UD-01	6.9265	739	0
TCGA-UCEC	TCGA-AX-A1C7-01	5.896	1054	0
TCGA-LGG	TCGA-TQ-A7RU-01	6.2808	1032	0
TCGA-GBMLGG	TCGA-TQ-A7RU-01	6.2808	1032	0
TCGA-KIRC	TCGA-BP-4982-01	7.1075	1014	0
TCGA-KIPAN	TCGA-BP-4982-01	7.1075	1014	0
TCGA-SKCM-M	TCGA-EE-A2GP-06	7.4634	423	1
TCGA-SKCM	TCGA-EE-A2GP-06	7.4634	423	1
TCGA-TGCT	TCGA-2G-AAG0-01	7.9877	1529	0
TCGA-BLCA	TCGA-CU-A0YR-01	7.6448	460	1
TCGA-UCEC	TCGA-EO-A22X-01	7.6655	1752	0
TCGA-LIHC	TCGA-DD-A4ND-01	6.8162	2746	0
TCGA-THYM	TCGA-X7-A8DB-01	7.4764	1992	0
TCGA-LUSC	TCGA-66-2785-01	6.4776	60	0
TCGA-BRCA	TCGA-OL-A66K-01	7.3103	1275	0
TCGA-KIRP	TCGA-P4-A5E8-01	6.7144	1306	1
TCGA-KIPAN	TCGA-P4-A5E8-01	6.7144	1306	1
TCGA-ESCA	TCGA-Q9-A6FW-01	7.1837	238	0
TCGA-STES	TCGA-Q9-A6FW-01	7.1837	238	0
TCGA-STAD	TCGA-IN-7806-01	7.0543	1106	0
TCGA-STES	TCGA-IN-7806-01	7.0543	1106	0
TCGA-OV	TCGA-36-1574-01	7.1133	686	0
TCGA-HNSC	TCGA-QK-A8Z8-01	7.1924	171	1
TCGA-HNSC	TCGA-CQ-5326-01	7.835	89	1
TCGA-LGG	TCGA-DB-A4XF-01	5.6843	1021	0
TCGA-GBMLGG	TCGA-DB-A4XF-01	5.6843	1021	0
TCGA-LIHC	TCGA-2Y-A9H2-01	6.777	1731	0
TCGA-CESC	TCGA-C5-A7CM-01	7.251	619	0
TCGA-TGCT	TCGA-4K-AAAL-01	7.5945	483	0
TCGA-PRAD	TCGA-G9-6367-01	6.5057	1222	0
TCGA-KIRP	TCGA-A4-A5Y1-01	6.8941	395	1
TCGA-KIPAN	TCGA-A4-A5Y1-01	6.8941	395	1
TCGA-LUSC	TCGA-56-8201-01	7.5967	397	1
TCGA-PRAD	TCGA-G9-6342-01	6.8896	1696	0
TCGA-HNSC	TCGA-KU-A66T-01	6.9835	552	0
TCGA-LIHC	TCGA-DD-AAVW-01	6.3933	2317	0
TCGA-KIRC	TCGA-CJ-4905-01	7.4226	1496	0
TCGA-KIPAN	TCGA-CJ-4905-01	7.4226	1496	0
TCGA-ESCA	TCGA-LN-A7HY-01	7.0744	366	0
TCGA-STES	TCGA-LN-A7HY-01	7.0744	366	0
TCGA-PRAD	TCGA-KK-A7AQ-01	6.3544	1610	0
TCGA-SARC	TCGA-IE-A3OV-01	6.7925	2448	1
TCGA-KIRP	TCGA-G7-6790-01	6.7249	1575	0
TCGA-KIPAN	TCGA-G7-6790-01	6.7249	1575	0
TCGA-TGCT	TCGA-XY-A89B-01	7.7627	471	0
TCGA-LIHC	TCGA-CC-A7IL-01	5.6676	278	1
TCGA-BRCA	TCGA-EW-A1OX-01	7.3428	911	0
TCGA-BRCA	TCGA-S3-AA10-01	7.5265	586	0
TCGA-UVM	TCGA-YZ-A984-01	7.1463	1396	1
TCGA-PRAD	TCGA-EJ-A65M-01	6.3522	230	0
TCGA-KIRC	TCGA-BP-5174-01	6.7381	2257	0
TCGA-KIPAN	TCGA-BP-5174-01	6.7381	2257	0
TCGA-PCPG	TCGA-QR-A705-01	6.0993	317	0
TCGA-OV	TCGA-20-1684-01	7.3939	581	0
TCGA-UCS	TCGA-N8-A4PI-01	7.1214	810	1
TCGA-LUAD	TCGA-05-4402-01	6.8963	244	0
TCGA-TGCT	TCGA-2G-AAH4-01	7.8891	6210	0
TCGA-HNSC	TCGA-CX-7086-01	8.0594	573	0
TCGA-THCA	TCGA-ET-A25L-01	6.5549	1721	0
TCGA-KIRP	TCGA-UZ-A9PZ-01	6.849	657	0
TCGA-KIPAN	TCGA-UZ-A9PZ-01	6.849	657	0
TCGA-BRCA	TCGA-A8-A0A9-01	8.0283	822	0
TCGA-THCA	TCGA-DE-A2OL-01	7.2718	1145	0
TCGA-KIRP	TCGA-G7-A4TM-01	7.2765	768	0
TCGA-KIPAN	TCGA-G7-A4TM-01	7.2765	768	0
TCGA-KIRP	TCGA-BQ-7060-01	6.2685	214	0
TCGA-KIPAN	TCGA-BQ-7060-01	6.2685	214	0
TCGA-LIHC	TCGA-DD-A4NS-01	6.8235	2456	1
TCGA-HNSC	TCGA-CN-5356-01	8.1061	1409	0
TCGA-KIRC	TCGA-EU-5905-01	6.6006	119	0
TCGA-KIPAN	TCGA-EU-5905-01	6.6006	119	0
TCGA-KIRC	TCGA-B0-4697-01	5.0259	578	1
TCGA-KIPAN	TCGA-B0-4697-01	5.0259	578	1
TCGA-PCPG	TCGA-QR-A6GO-01	6.9937	1065	0
TCGA-STAD	TCGA-IN-AB1X-01	7.7231	411	0
TCGA-STES	TCGA-IN-AB1X-01	7.7231	411	0
TCGA-BRCA	TCGA-BH-A1FB-01	7.1383	3669	1
TCGA-LUAD	TCGA-44-8119-01	7.3506	285	0
TCGA-OV	TCGA-13-0886-01	5.9894	4665	0
TCGA-SKCM-M	TCGA-EE-A29X-06	7.3034	545	1
TCGA-SKCM	TCGA-EE-A29X-06	7.3034	545	1
TCGA-KIRC	TCGA-BP-4759-01	5.9112	2372	0
TCGA-KIPAN	TCGA-BP-4759-01	5.9112	2372	0
TCGA-SKCM-M	TCGA-GN-A262-06	6.8849	4255	0
TCGA-SKCM	TCGA-GN-A262-06	6.8849	4255	0
TCGA-LGG	TCGA-FG-A713-01	4.9169	622	0
TCGA-GBMLGG	TCGA-FG-A713-01	4.9169	622	0
TCGA-UVM	TCGA-V4-A9EZ-01	6.1083	599	0
TCGA-CESC	TCGA-VS-A9V2-01	7.6479	555	0
TCGA-CESC	TCGA-VS-A94Y-01	7.2577	144	1
TCGA-COAD	TCGA-F4-6461-01	7.2759	338	1
TCGA-COADREAD	TCGA-F4-6461-01	7.2759	338	1
TCGA-LUSC	TCGA-90-A4EE-01	7.1911	688	0
TCGA-CESC	TCGA-C5-A8ZZ-01	8.1155	636	0
TCGA-MESO	TCGA-MQ-A6BS-01	6.5521	608	0
TCGA-STAD	TCGA-CD-8533-01	8.5224	468	0
TCGA-STES	TCGA-CD-8533-01	8.5224	468	0
TCGA-SARC	TCGA-IS-A3K8-01	6.573	4845	0
TCGA-LGG	TCGA-E1-A7YL-01	6.797	492	1
TCGA-GBMLGG	TCGA-E1-A7YL-01	6.797	492	1
TCGA-BRCA	TCGA-A2-A04T-01	6.8455	2246	0
TCGA-KIRC	TCGA-CJ-6030-01	6.6843	2299	0
TCGA-KIPAN	TCGA-CJ-6030-01	6.6843	2299	0
TCGA-BRCA	TCGA-OL-A5S0-01	7.0712	620	0
TCGA-MESO	TCGA-UD-AAC5-01	7.7968	253	1
TCGA-LIHC	TCGA-DD-AADI-01	6.5215	1085	0
TCGA-PRAD	TCGA-FC-7961-01	6.942	469	0
TCGA-LIHC	TCGA-CC-A7IG-01	6.7133	299	1
TCGA-LIHC	TCGA-MR-A8JO-01	6.213	330	0
TCGA-BLCA	TCGA-GC-A3YS-01	7.3496	758	0
TCGA-ACC	TCGA-OR-A5LG-01	6.6608	1589	0
TCGA-UVM	TCGA-VD-A8KH-01	6.1813	1158	0
TCGA-SKCM-M	TCGA-EE-A3JB-06	7.5553	6138	0
TCGA-SKCM	TCGA-EE-A3JB-06	7.5553	6138	0
TCGA-KIRC	TCGA-CJ-4918-01	6.6668	93	1
TCGA-KIPAN	TCGA-CJ-4918-01	6.6668	93	1
TCGA-BRCA	TCGA-A8-A07J-01	6.8886	365	0
TCGA-BRCA	TCGA-E9-A229-01	7.4368	1148	0
TCGA-ESCA	TCGA-L5-A4OU-01	7.5599	882	0
TCGA-STES	TCGA-L5-A4OU-01	7.5599	882	0
TCGA-SARC	TCGA-X9-A971-01	8.0435	831	0
TCGA-HNSC	TCGA-D6-6826-01	7.7616	348	0
TCGA-BRCA	TCGA-A2-A0SX-01	7.1597	1534	0
TCGA-OV	TCGA-57-1994-01	7.8121	761	0
TCGA-SKCM-M	TCGA-ER-A19E-06	7.902	396	1
TCGA-SKCM	TCGA-ER-A19E-06	7.902	396	1
TCGA-PRAD	TCGA-KK-A8I4-01	7.0883	2259	0
TCGA-KIRP	TCGA-UZ-A9PM-01	6.3189	3811	0
TCGA-KIPAN	TCGA-UZ-A9PM-01	6.3189	3811	0
TCGA-KIRC	TCGA-B8-5545-01	7.0545	1525	0
TCGA-KIPAN	TCGA-B8-5545-01	7.0545	1525	0
TCGA-PAAD	TCGA-US-A776-01	7.1718	1216	0
TCGA-STAD	TCGA-BR-8484-01	7.8966	766	0
TCGA-STES	TCGA-BR-8484-01	7.8966	766	0
TCGA-LUAD	TCGA-55-7724-01	6.4951	705	0
TCGA-COAD	TCGA-F4-6703-01	7.436	1456	0
TCGA-COADREAD	TCGA-F4-6703-01	7.436	1456	0
TCGA-STAD	TCGA-HU-A4G8-01	7.875	690	0
TCGA-STES	TCGA-HU-A4G8-01	7.875	690	0
TCGA-THCA	TCGA-FY-A3I4-01	7.1928	542	0
TCGA-SARC	TCGA-DX-AB2Q-01	7.9023	2030	0
TCGA-LUAD	TCGA-44-6776-01	6.4951	2616	0
TCGA-LUAD	TCGA-49-4514-01	6.6936	1700	0
TCGA-PRAD	TCGA-HC-A6AQ-01	6.2702	106	0
TCGA-THYM	TCGA-XM-A8RL-01	7.6953	2562	0
TCGA-PRAD	TCGA-EJ-7789-01	6.9028	1105	0
TCGA-LUSC	TCGA-85-A50Z-01	7.1544	493	0
TCGA-SKCM-M	TCGA-FS-A1ZT-06	7.2836	1617	0
TCGA-SKCM	TCGA-FS-A1ZT-06	7.2836	1617	0
TCGA-KIRC	TCGA-B2-3923-01	5.2772	992	0
TCGA-KIPAN	TCGA-B2-3923-01	5.2772	992	0
TCGA-LUAD	TCGA-55-8204-01	7.1796	515	0
TCGA-UCEC	TCGA-QS-A5YR-01	7.0641	719	0
TCGA-LUAD	TCGA-L4-A4E6-01	6.3518	435	0
TCGA-ESCA	TCGA-L5-A8NJ-01	8.1776	501	0
TCGA-STES	TCGA-L5-A8NJ-01	8.1776	501	0
TCGA-SARC	TCGA-DX-A1L0-01	7.7268	564	1
TCGA-BRCA	TCGA-BH-A0AW-01	6.7718	622	0
TCGA-CESC	TCGA-VS-A9UJ-01	7.6277	52	1
TCGA-PAAD	TCGA-XD-AAUH-01	6.5246	395	0
TCGA-BRCA	TCGA-BH-A2L8-01	7.0309	612	0
TCGA-STAD	TCGA-HU-A4GC-01	6.7995	99	0
TCGA-STES	TCGA-HU-A4GC-01	6.7995	99	0
TCGA-SKCM-P	TCGA-EB-A5SE-01	7.2797	401	1
TCGA-SKCM	TCGA-EB-A5SE-01	7.2797	401	1
TCGA-BRCA	TCGA-BH-A0B6-01	7.0442	2483	0
TCGA-COAD	TCGA-AA-3492-01	7.3446	92	0
TCGA-COADREAD	TCGA-AA-3492-01	7.3446	92	0
TCGA-COAD	TCGA-G4-6293-01	7.216	4051	0
TCGA-COADREAD	TCGA-G4-6293-01	7.216	4051	0
TCGA-STAD	TCGA-CG-5726-01	8.5898	881	0
TCGA-STES	TCGA-CG-5726-01	8.5898	881	0
TCGA-LGG	TCGA-CS-5396-01	6.2778	1631	0
TCGA-GBMLGG	TCGA-CS-5396-01	6.2778	1631	0
TCGA-SARC	TCGA-DX-AB32-01	7.4408	3102	0
TCGA-HNSC	TCGA-CN-6998-01	7.1895	357	1
TCGA-HNSC	TCGA-BB-7866-01	7.8351	1368	0
TCGA-OV	TCGA-31-1959-01	7.6757	67	0
TCGA-HNSC	TCGA-HD-7832-01	8.1088	836	0
TCGA-KIRP	TCGA-Y8-A895-01	6.9811	484	0
TCGA-KIPAN	TCGA-Y8-A895-01	6.9811	484	0
TCGA-PCPG	TCGA-QR-A6H1-01	6.8638	431	0
TCGA-BRCA	TCGA-AO-A0JL-01	6.6989	1683	0
TCGA-BRCA	TCGA-BH-A0BS-01	7.2217	2612	0
TCGA-LUSC	TCGA-56-8623-01	6.4531	692	0
TCGA-THCA	TCGA-DJ-A4UL-01	7.0087	939	0
TCGA-STAD	TCGA-CD-A48C-01	7.0128	353	1
TCGA-STES	TCGA-CD-A48C-01	7.0128	353	1
TCGA-DLBC	TCGA-FF-8046-01	6.0084	751	0
TCGA-STAD	TCGA-FP-8099-01	8.0888	519	0
TCGA-STES	TCGA-FP-8099-01	8.0888	519	0
TCGA-BRCA	TCGA-B6-A0IG-01	7.0069	4456	1
TCGA-PAAD	TCGA-XN-A8T5-01	6.7973	720	0
TCGA-PRAD	TCGA-ZG-A9M4-01	6.8278	547	0
TCGA-PRAD	TCGA-EJ-7793-01	6.4876	114	0
TCGA-COAD	TCGA-AA-3496-01	7.5323	31	0
TCGA-COADREAD	TCGA-AA-3496-01	7.5323	31	0
TCGA-OV	TCGA-23-1022-01	6.3649	1511	1
TCGA-PCPG	TCGA-QR-A7IN-01	6.9061	377	0
TCGA-BLCA	TCGA-ZF-AA4N-01	7.2484	88	1
TCGA-BLCA	TCGA-XF-AAMG-01	7.5675	3364	0
TCGA-BLCA	TCGA-GC-A3RC-01	7.3555	484	0
TCGA-THCA	TCGA-DJ-A13T-01	7.2449	1709	0
TCGA-PCPG	TCGA-QR-A6GT-01	6.8154	4185	0
TCGA-PRAD	TCGA-HC-7210-01	7.249	868	0
TCGA-KIRC	TCGA-CJ-4923-01	6.732	572	1
TCGA-KIPAN	TCGA-CJ-4923-01	6.732	572	1
TCGA-COAD	TCGA-G4-6625-01	7.4654	2792	0
TCGA-COADREAD	TCGA-G4-6625-01	7.4654	2792	0
TCGA-LUSC	TCGA-98-A538-01	7.8418	826	0
TCGA-THCA	TCGA-ET-A3BO-01	6.8181	1533	0
TCGA-SKCM-M	TCGA-EB-A5VV-06	6.5828	214	0
TCGA-SKCM	TCGA-EB-A5VV-06	6.5828	214	0
TCGA-UCEC	TCGA-KP-A3W0-01	6.3942	404	0
TCGA-HNSC	TCGA-CV-6436-01	6.5715	1899	0
TCGA-THYM	TCGA-XM-A8RC-01	7.3504	2963	0
TCGA-PRAD	TCGA-EJ-7782-01	7.1474	1167	0
TCGA-LGG	TCGA-HW-8322-01	6.9051	758	0
TCGA-GBMLGG	TCGA-HW-8322-01	6.9051	758	0
TCGA-KIRC	TCGA-BP-4159-01	6.0159	2601	1
TCGA-KIPAN	TCGA-BP-4159-01	6.0159	2601	1
TCGA-CESC	TCGA-Q1-A6DT-01	7.1814	275	1
TCGA-BLCA	TCGA-CF-A8HY-01	6.8452	345	0
TCGA-ESCA	TCGA-L5-A8NN-01	7.9279	167	0
TCGA-STES	TCGA-L5-A8NN-01	7.9279	167	0
TCGA-BLCA	TCGA-ZF-A9RL-01	7.1674	2703	0
TCGA-OV	TCGA-25-1633-01	7.5764	1891	1
TCGA-BRCA	TCGA-OL-A66L-01	6.6135	1301	0
TCGA-BRCA	TCGA-BH-A0DO-01	7.3867	1644	0
TCGA-PRAD	TCGA-HC-A8CY-01	6.9437	290	0
TCGA-SARC	TCGA-X6-A8C5-01	6.4785	1547	0
TCGA-THCA	TCGA-FK-A4UB-01	6.9592	3531	0
TCGA-COAD	TCGA-DM-A28E-01	7.3133	3648	0
TCGA-COADREAD	TCGA-DM-A28E-01	7.3133	3648	0
TCGA-LGG	TCGA-S9-A6U9-01	6.2112	2918	0
TCGA-GBMLGG	TCGA-S9-A6U9-01	6.2112	2918	0
TCGA-LIHC	TCGA-5R-AA1C-01	6.169	520	0
TCGA-COAD	TCGA-CK-6747-01	7.9926	2523	0
TCGA-COADREAD	TCGA-CK-6747-01	7.9926	2523	0
TCGA-PCPG	TCGA-WB-A819-01	6.6349	1031	0
TCGA-KIRP	TCGA-Y8-A8S1-01	6.6343	404	0
TCGA-KIPAN	TCGA-Y8-A8S1-01	6.6343	404	0
TCGA-CHOL	TCGA-W5-AA2I-01	6.9179	1939	1
TCGA-KIRC	TCGA-CJ-5680-01	7.0043	768	1
TCGA-KIPAN	TCGA-CJ-5680-01	7.0043	768	1
TCGA-LUSC	TCGA-34-5234-01	4.7339	2271	0
TCGA-HNSC	TCGA-CV-7097-01	7.7948	385	1
TCGA-PAAD	TCGA-IB-8126-01	5.4822	462	0
TCGA-BLCA	TCGA-XF-A9T0-01	7.0323	799	0
TCGA-SKCM-P	TCGA-FW-A5DX-01	6.9075	640	0
TCGA-SKCM	TCGA-FW-A5DX-01	6.9075	640	0
TCGA-PAAD	TCGA-HZ-7920-01	6.8732	236	0
TCGA-LUAD	TCGA-62-A46O-01	7.3055	1454	1
TCGA-OV	TCGA-04-1517-01	7.2245	608	1
TCGA-LIHC	TCGA-G3-AAV1-01	6.1129	359	1
TCGA-LGG	TCGA-HT-7469-01	7.1913	351	1
TCGA-GBMLGG	TCGA-HT-7469-01	7.1913	351	1
TCGA-LUSC	TCGA-56-7822-01	7.0071	532	1
TCGA-LUSC	TCGA-56-A62T-01	7.5817	440	0
TCGA-BRCA	TCGA-LL-A73Y-01	7.1999	477	0
TCGA-LIHC	TCGA-BC-A10X-01	5.844	770	0
TCGA-BLCA	TCGA-UY-A78M-01	6.934	690	1
TCGA-BRCA	TCGA-BH-A0DK-01	6.8239	423	0
TCGA-BLCA	TCGA-K4-A4AC-01	7.7523	278	1
TCGA-KIRP	TCGA-B3-4104-01	7.295	1049	0
TCGA-KIPAN	TCGA-B3-4104-01	7.295	1049	0
TCGA-LUSC	TCGA-85-A4JB-01	7.2929	942	0
TCGA-LUAD	TCGA-62-A472-01	7.0104	910	0
TCGA-OV	TCGA-30-1714-01	5.5341	1158	1
TCGA-LUAD	TCGA-NJ-A55R-01	6.4164	603	0
TCGA-OV	TCGA-23-1026-01	7.1695	816	0
TCGA-READ	TCGA-F5-6702-01	7.2934	452	0
TCGA-COADREAD	TCGA-F5-6702-01	7.2934	452	0
TCGA-CESC	TCGA-VS-A9UQ-01	7.7764	1263	0
TCGA-BRCA	TCGA-BH-A0BG-01	6.993	1871	0
TCGA-UCEC	TCGA-AJ-A23N-01	7.2728	439	1
TCGA-CHOL	TCGA-W5-AA34-01	6.6045	555	1
TCGA-COAD	TCGA-CA-5255-01	6.9479	376	0
TCGA-COADREAD	TCGA-CA-5255-01	6.9479	376	0
TCGA-OV	TCGA-24-1431-01	5.7729	567	1
TCGA-COAD	TCGA-CK-4947-01	7.5789	534	0
TCGA-COADREAD	TCGA-CK-4947-01	7.5789	534	0
TCGA-SARC	TCGA-IE-A6BZ-01	7.4192	605	0
TCGA-UVM	TCGA-WC-A88A-01	6.7574	82	1
TCGA-BLCA	TCGA-G2-A2ES-01	7.1536	1004	1
TCGA-SARC	TCGA-DX-A8BM-01	7.5248	1456	0
TCGA-PRAD	TCGA-V1-A8MU-01	6.8614	1876	0
TCGA-BRCA	TCGA-A8-A06Z-01	7.2327	31	0
TCGA-UCEC	TCGA-KP-A3W1-01	6.2856	288	0
TCGA-GBM	TCGA-32-2634-01	7.3033	693	0
TCGA-GBMLGG	TCGA-32-2634-01	7.3033	693	0
TCGA-READ	TCGA-G5-6233-01	7.3522	556	1
TCGA-COADREAD	TCGA-G5-6233-01	7.3522	556	1
TCGA-LUAD	TCGA-62-8395-01	7.0481	1216	0
TCGA-OV	TCGA-13-0800-01	6.6642	2661	0
TCGA-MESO	TCGA-3U-A98H-01	6.7057	1156	1
TCGA-UCEC	TCGA-D1-A2G0-01	7.4556	1484	0
TCGA-THCA	TCGA-ET-A40P-01	6.8247	1338	0
TCGA-OV	TCGA-13-0765-01	5.8607	1389	1
TCGA-KIRC	TCGA-CW-5589-01	6.756	2378	0
TCGA-KIPAN	TCGA-CW-5589-01	6.756	2378	0
TCGA-STAD	TCGA-VQ-A8E0-01	7.3315	562	1
TCGA-STES	TCGA-VQ-A8E0-01	7.3315	562	1
TCGA-TGCT	TCGA-2G-AAHG-01	8.1033	1819	0
TCGA-OV	TCGA-61-1998-01	7.0779	168	0
TCGA-OV	TCGA-23-1029-01	7.4893	268	0
TCGA-LUAD	TCGA-95-7567-01	7.177	568	0
TCGA-BRCA	TCGA-E2-A14U-01	7.1086	1318	0
TCGA-COAD	TCGA-AD-6888-01	6.9438	472	1
TCGA-COADREAD	TCGA-AD-6888-01	6.9438	472	1
TCGA-STAD	TCGA-KB-A93G-01	7.6375	613	0
TCGA-STES	TCGA-KB-A93G-01	7.6375	613	0
TCGA-COAD	TCGA-F4-6809-01	7.2162	403	1
TCGA-COADREAD	TCGA-F4-6809-01	7.2162	403	1
TCGA-KIRC	TCGA-A3-3385-01	6.56	1993	0
TCGA-KIPAN	TCGA-A3-3385-01	6.56	1993	0
TCGA-LUAD	TCGA-50-5051-01	6.5993	478	1
TCGA-KIRC	TCGA-BP-5000-01	6.0264	563	0
TCGA-KIPAN	TCGA-BP-5000-01	6.0264	563	0
TCGA-HNSC	TCGA-CN-A63U-01	7.3638	964	0
TCGA-COAD	TCGA-CK-5914-01	7.7799	669	0
TCGA-COADREAD	TCGA-CK-5914-01	7.7799	669	0
TCGA-LGG	TCGA-HT-7478-01	5.5747	194	0
TCGA-GBMLGG	TCGA-HT-7478-01	5.5747	194	0
TCGA-OV	TCGA-23-1030-01	6.8829	886	0
TCGA-KIRP	TCGA-5P-A9K6-01	6.338	1914	0
TCGA-KIPAN	TCGA-5P-A9K6-01	6.338	1914	0
TCGA-CESC	TCGA-VS-A8EG-01	8.0133	1386	0
TCGA-UCEC	TCGA-D1-A3JP-01	6.5886	515	0
TCGA-KIRP	TCGA-IZ-8195-01	5.7244	677	0
TCGA-KIPAN	TCGA-IZ-8195-01	5.7244	677	0
TCGA-LUSC	TCGA-43-8116-01	7.7008	358	0
TCGA-LUSC	TCGA-18-3410-01	7.2164	146	0
TCGA-STAD	TCGA-BR-7704-01	7.2716	1072	0
TCGA-STES	TCGA-BR-7704-01	7.2716	1072	0
TCGA-OV	TCGA-61-2003-01	7.2166	122	0
TCGA-KIRC	TCGA-MW-A4EC-01	6.7978	498	0
TCGA-KIPAN	TCGA-MW-A4EC-01	6.7978	498	0
TCGA-ESCA	TCGA-L5-A4OM-01	8.3565	1458	0
TCGA-STES	TCGA-L5-A4OM-01	8.3565	1458	0
TCGA-PCPG	TCGA-WB-A80Q-01	6.4576	3880	0
TCGA-UCEC	TCGA-BK-A13B-01	6.6536	966	0
TCGA-CESC	TCGA-EX-A69L-01	6.9028	602	0
TCGA-BLCA	TCGA-FJ-A871-01	7.4225	272	1
TCGA-PCPG	TCGA-WB-A817-01	6.7394	1310	0
TCGA-LUAD	TCGA-55-A48Y-01	6.44	630	0
TCGA-THCA	TCGA-BJ-A45F-01	6.081	105	0
TCGA-KIRC	TCGA-AK-3447-01	3.7813	1217	0
TCGA-KIPAN	TCGA-AK-3447-01	3.7813	1217	0
TCGA-CESC	TCGA-Q1-A73O-01	7.7469	428	0
TCGA-COAD	TCGA-D5-6532-01	7.6086	555	0
TCGA-COADREAD	TCGA-D5-6532-01	7.6086	555	0
TCGA-PCPG	TCGA-QR-A70J-01	7.0452	399	0
TCGA-CESC	TCGA-VS-A8QC-01	7.4303	350	1
TCGA-SKCM-M	TCGA-W3-AA1O-06	7.4192	122	1
TCGA-SKCM	TCGA-W3-AA1O-06	7.4192	122	1
TCGA-LUAD	TCGA-86-A456-01	6.8154	896	0
TCGA-LUSC	TCGA-33-AASB-01	7.2639	211	1
TCGA-CESC	TCGA-EA-A5ZE-01	7.315	829	0
TCGA-MESO	TCGA-XT-AASU-01	7.1076	142	1
TCGA-THCA	TCGA-FE-A22Z-01	6.8303	2243	0
TCGA-KIRP	TCGA-B9-4617-01	5.9481	35	0
TCGA-KIPAN	TCGA-B9-4617-01	5.9481	35	0
TCGA-PCPG	TCGA-RW-A8AZ-01	6.6383	88	0
TCGA-LUAD	TCGA-50-5068-01	5.3847	1499	1
TCGA-LUSC	TCGA-NK-A5CR-01	7.4044	2542	0
TCGA-LIHC	TCGA-ZS-A9CF-01	6.3785	2412	0
TCGA-BRCA	TCGA-AR-A24Q-01	7.2369	3172	0
TCGA-SKCM-M	TCGA-D3-A2J7-06	6.6528	3136	1
TCGA-SKCM	TCGA-D3-A2J7-06	6.6528	3136	1
TCGA-LUSC	TCGA-56-7580-01	7.5753	925	0
TCGA-THCA	TCGA-E8-A416-01	6.8784	952	0
TCGA-PAAD	TCGA-S4-A8RM-01	7.0819	737	0
TCGA-LGG	TCGA-DU-A5TW-01	6.2528	760	0
TCGA-GBMLGG	TCGA-DU-A5TW-01	6.2528	760	0
TCGA-OV	TCGA-24-2038-01	6.8204	1354	1
TCGA-SARC	TCGA-DX-AB2S-01	6.6672	280	0
TCGA-PRAD	TCGA-G9-6329-01	6.7518	1266	0
TCGA-KIRP	TCGA-MH-A560-01	5.7705	924	0
TCGA-KIPAN	TCGA-MH-A560-01	5.7705	924	0
TCGA-BLCA	TCGA-GD-A3OP-01	6.8104	64	0
TCGA-LUSC	TCGA-90-7769-01	7.1996	358	0
TCGA-HNSC	TCGA-CR-6467-01	7.5501	1777	0
TCGA-LGG	TCGA-S9-A6TX-01	5.7963	1245	0
TCGA-GBMLGG	TCGA-S9-A6TX-01	5.7963	1245	0
TCGA-DLBC	TCGA-GS-A9TV-01	7.4517	730	0
TCGA-LUSC	TCGA-37-4135-01	5.3607	207	0
TCGA-LGG	TCGA-RY-A83Z-01	6.0919	301	0
TCGA-GBMLGG	TCGA-RY-A83Z-01	6.0919	301	0
TCGA-CESC	TCGA-JX-A5QV-01	7.1974	636	0
TCGA-HNSC	TCGA-CN-6988-01	7.3175	318	0
TCGA-SKCM-M	TCGA-DA-A3F5-06	7.0801	6873	1
TCGA-SKCM	TCGA-DA-A3F5-06	7.0801	6873	1
TCGA-SARC	TCGA-DX-A8BQ-01	6.9952	1579	0
TCGA-BRCA	TCGA-EW-A1P5-01	7.5344	703	0
TCGA-PCPG	TCGA-QR-A6GS-01	7.1697	38	0
TCGA-BLCA	TCGA-FD-A3SL-01	6.7111	712	1
TCGA-THCA	TCGA-ET-A39L-01	7.3369	3299	0
TCGA-BRCA	TCGA-BH-A1FN-01	7.6049	2192	1
TCGA-CESC	TCGA-EK-A2GZ-01	6.9196	383	0
TCGA-UCS	TCGA-N5-A4RM-01	6.7478	148	1
TCGA-LIHC	TCGA-DD-AACN-01	7.0042	1302	0
TCGA-KIRC	TCGA-MM-A564-01	6.0552	607	0
TCGA-KIPAN	TCGA-MM-A564-01	6.0552	607	0
TCGA-COAD	TCGA-3L-AA1B-01	7.3858	475	0
TCGA-COADREAD	TCGA-3L-AA1B-01	7.3858	475	0
TCGA-GBM	TCGA-06-0141-01	5.477	313	1
TCGA-GBMLGG	TCGA-06-0141-01	5.477	313	1
TCGA-HNSC	TCGA-DQ-7596-01	7.4135	1265	0
TCGA-PAAD	TCGA-HZ-8002-01	7.0157	366	1
TCGA-PAAD	TCGA-3A-A9IH-01	6.4601	1021	0
TCGA-UCEC	TCGA-B5-A3FC-01	6.6542	2185	0
TCGA-THCA	TCGA-BJ-A0ZC-01	6.8855	352	0
TCGA-BLCA	TCGA-XF-A9T3-01	7.3627	68	0
TCGA-LUSC	TCGA-98-8020-01	7.5591	84	1
TCGA-HNSC	TCGA-CV-5970-01	7.0657	406	1
TCGA-SARC	TCGA-DX-AB2G-01	6.9311	478	0
TCGA-BRCA	TCGA-A7-A4SE-01	7.5109	644	0
TCGA-BRCA	TCGA-A1-A0SJ-01	7.4345	416	0
TCGA-LUAD	TCGA-J2-A4AG-01	6.7458	988	0
TCGA-READ	TCGA-EI-6510-01	7.2972	556	0
TCGA-COADREAD	TCGA-EI-6510-01	7.2972	556	0
TCGA-COAD	TCGA-G4-6588-01	7.8872	796	0
TCGA-COADREAD	TCGA-G4-6588-01	7.8872	796	0
TCGA-LIHC	TCGA-RC-A7S9-01	6.6458	640	0
TCGA-DLBC	TCGA-GS-A9TZ-01	7.1957	765	0
TCGA-LUSC	TCGA-22-5471-01	6.9831	1845	0
TCGA-BRCA	TCGA-E2-A570-01	7.1865	931	0
TCGA-STAD	TCGA-VQ-A91V-01	7.362	1297	0
TCGA-STES	TCGA-VQ-A91V-01	7.362	1297	0
TCGA-HNSC	TCGA-CV-7425-01	7.0876	1718	1
TCGA-PCPG	TCGA-QR-A6H4-01	6.67	2661	0
TCGA-BRCA	TCGA-BH-A201-01	7.3347	856	0
TCGA-OV	TCGA-61-2016-01	7.2622	36	1
TCGA-HNSC	TCGA-CN-4733-01	7.1796	1586	0
TCGA-CESC	TCGA-IR-A3LL-01	7.3001	1106	0
TCGA-LUAD	TCGA-05-4405-01	7.1976	610	0
TCGA-GBM	TCGA-06-0125-01	7.4722	1448	1
TCGA-GBMLGG	TCGA-06-0125-01	7.4722	1448	1
TCGA-THYM	TCGA-XU-A92Z-01	7.714	3663	0
TCGA-LIHC	TCGA-DD-AA3A-01	7.1655	410	0
TCGA-PCPG	TCGA-RW-A68A-01	6.7982	762	0
TCGA-OV	TCGA-13-0885-01	6.0225	3388	0
TCGA-STAD	TCGA-FP-A4BF-01	6.9784	168	1
TCGA-STES	TCGA-FP-A4BF-01	6.9784	168	1
TCGA-BRCA	TCGA-A8-A09E-01	7.4969	1492	0
TCGA-THYM	TCGA-ZB-A964-01	8.0697	1287	0
TCGA-KIRP	TCGA-Y8-A8RZ-01	6.1927	205	0
TCGA-KIPAN	TCGA-Y8-A8RZ-01	6.1927	205	0
TCGA-HNSC	TCGA-CR-5243-01	7.8198	2562	0
TCGA-HNSC	TCGA-MT-A51W-01	6.8571	437	0
TCGA-THYM	TCGA-ZB-A96C-01	7.409	2163	0
TCGA-BRCA	TCGA-D8-A27V-01	7.4942	381	0
TCGA-BLCA	TCGA-ZF-AA4V-01	7.3746	1806	0
TCGA-LUAD	TCGA-50-5944-01	6.7372	1750	0
TCGA-STAD	TCGA-RD-A8N1-01	7.5307	3519	0
TCGA-STES	TCGA-RD-A8N1-01	7.5307	3519	0
TCGA-STAD	TCGA-BR-8687-01	7.1509	250	1
TCGA-STES	TCGA-BR-8687-01	7.1509	250	1
TCGA-ACC	TCGA-OR-A5JV-01	5.9809	2023	0
TCGA-THCA	TCGA-EM-A2CO-01	6.1532	184	0
TCGA-LUAD	TCGA-86-7955-01	7.0386	1072	0
TCGA-STAD	TCGA-BR-A4IY-01	7.429	392	0
TCGA-STES	TCGA-BR-A4IY-01	7.429	392	0
TCGA-PRAD	TCGA-V1-A9OQ-01	6.0655	371	0
TCGA-LGG	TCGA-FG-A6IZ-01	5.8953	457	0
TCGA-GBMLGG	TCGA-FG-A6IZ-01	5.8953	457	0
TCGA-CESC	TCGA-C5-A1M5-01	7.6074	2052	1
TCGA-HNSC	TCGA-DQ-7592-01	7.7667	1143	0
TCGA-BRCA	TCGA-E2-A14Y-01	7.1001	2109	0
TCGA-THCA	TCGA-EM-A3AN-01	6.9783	1006	0
TCGA-PRAD	TCGA-YL-A9WI-01	6.8324	1623	0
TCGA-LUAD	TCGA-55-7727-01	6.8817	119	0
TCGA-PCPG	TCGA-QR-A6H0-01	6.5147	280	0
TCGA-LGG	TCGA-CS-4941-01	6.8095	234	1
TCGA-GBMLGG	TCGA-CS-4941-01	6.8095	234	1
TCGA-OV	TCGA-59-2351-01	7.6074	3532	0
TCGA-ACC	TCGA-OU-A5PI-01	6.2722	1171	0
TCGA-THYM	TCGA-XU-A92Q-01	7.2449	1092	0
TCGA-LUAD	TCGA-55-8510-01	6.8889	539	0
TCGA-BRCA	TCGA-MS-A51U-01	7.4044	681	0
TCGA-BRCA	TCGA-A8-A06Y-01	6.9213	791	0
TCGA-BLCA	TCGA-XF-AAMW-01	7.4425	253	1
TCGA-BRCA	TCGA-GI-A2C8-01	7.064	225	0
TCGA-HNSC	TCGA-CN-4722-01	7.141	1483	0
TCGA-THCA	TCGA-EL-A3ZM-01	6.2945	1096	0
TCGA-THCA	TCGA-DJ-A13X-01	7.0884	253	0
TCGA-SARC	TCGA-DX-A1L3-01	6.9033	1020	1
TCGA-HNSC	TCGA-HD-A633-01	7.4008	421	0
TCGA-BRCA	TCGA-AR-A1AM-01	7.4118	2991	0
TCGA-OV	TCGA-13-0890-01	7.5407	4424	0
TCGA-TGCT	TCGA-VF-A8AE-01	7.4751	727	0
TCGA-LGG	TCGA-DH-A7UT-01	5.7271	531	1
TCGA-GBMLGG	TCGA-DH-A7UT-01	5.7271	531	1
TCGA-COAD	TCGA-A6-6138-01	7.5618	685	0
TCGA-COADREAD	TCGA-A6-6138-01	7.5618	685	0
TCGA-LGG	TCGA-DU-5871-01	6.1837	576	0
TCGA-GBMLGG	TCGA-DU-5871-01	6.1837	576	0
TCGA-HNSC	TCGA-CV-7238-01	7.1432	2727	0
TCGA-THCA	TCGA-EL-A3T7-01	6.887	1256	0
TCGA-COAD	TCGA-F4-6808-01	7.302	1024	0
TCGA-COADREAD	TCGA-F4-6808-01	7.302	1024	0
TCGA-HNSC	TCGA-CN-5367-01	7.033	352	0
TCGA-HNSC	TCGA-D6-A74Q-01	7.1044	710	0
TCGA-LUAD	TCGA-86-8279-01	7.5867	949	0
TCGA-PCPG	TCGA-W2-A7HB-01	7.4352	604	0
TCGA-DLBC	TCGA-GR-A4D4-01	7.3327	1581	0
TCGA-HNSC	TCGA-CR-5250-01	7.701	799	0
TCGA-KIRC	TCGA-B0-5100-01	6.7471	1913	1
TCGA-KIPAN	TCGA-B0-5100-01	6.7471	1913	1
TCGA-PRAD	TCGA-EJ-7218-01	6.4426	2542	0
TCGA-PRAD	TCGA-XK-AAJR-01	6.7008	1124	0
TCGA-LUAD	TCGA-55-A494-01	7.1016	481	0
TCGA-KIRC	TCGA-BP-4991-01	7.1538	1413	0
TCGA-KIPAN	TCGA-BP-4991-01	7.1538	1413	0
TCGA-LUAD	TCGA-44-3917-01	4.6185	1183	0
TCGA-OV	TCGA-61-2000-01	6.8603	441	0
TCGA-KIRP	TCGA-A4-7288-01	7.5431	1857	0
TCGA-KIPAN	TCGA-A4-7288-01	7.5431	1857	0
TCGA-LUAD	TCGA-75-5125-01	7.157	2027	1
TCGA-KIRC	TCGA-B0-5400-01	6.3549	1733	0
TCGA-KIPAN	TCGA-B0-5400-01	6.3549	1733	0
TCGA-COAD	TCGA-G4-6317-01	7.4859	1095	0
TCGA-COADREAD	TCGA-G4-6317-01	7.4859	1095	0
TCGA-STAD	TCGA-HU-8244-01	7.4466	742	0
TCGA-STES	TCGA-HU-8244-01	7.4466	742	0
TCGA-OV	TCGA-25-2404-01	7.6247	883	1
TCGA-HNSC	TCGA-CV-7437-01	7.3292	506	1
TCGA-THCA	TCGA-EL-A3T3-01	6.5491	4017	0
TCGA-LIHC	TCGA-K7-A5RG-01	6.3957	519	0
TCGA-PRAD	TCGA-ZG-A9LU-01	6.6033	579	0
TCGA-OV	TCGA-13-0768-01	6.3243	1784	1
TCGA-BRCA	TCGA-B6-A409-01	7.1747	573	1
TCGA-PRAD	TCGA-KC-A7F5-01	6.858	91	0
TCGA-CESC	TCGA-C5-A7X8-01	7.1695	83	0
TCGA-KIRC	TCGA-BP-4330-01	7.0008	1888	0
TCGA-KIPAN	TCGA-BP-4330-01	7.0008	1888	0
TCGA-LUSC	TCGA-21-1078-01	7.304	474	1
TCGA-LUSC	TCGA-34-2600-01	7.5994	1874	0
TCGA-CESC	TCGA-EA-A3HS-01	7.2754	959	0
TCGA-SKCM-M	TCGA-W3-AA1W-06	7.0285	6666	0
TCGA-SKCM	TCGA-W3-AA1W-06	7.0285	6666	0
TCGA-SARC	TCGA-3B-A9HZ-01	6.5013	1170	0
TCGA-KIRC	TCGA-CJ-4873-01	6.292	2259	0
TCGA-KIPAN	TCGA-CJ-4873-01	6.292	2259	0
TCGA-KIRP	TCGA-SX-A7SL-01	6.556	823	0
TCGA-KIPAN	TCGA-SX-A7SL-01	6.556	823	0
TCGA-BRCA	TCGA-BH-A1EX-01	6.7954	1508	1
TCGA-LGG	TCGA-HW-8321-01	6.0259	1294	0
TCGA-GBMLGG	TCGA-HW-8321-01	6.0259	1294	0
TCGA-COAD	TCGA-CK-4952-01	8.2168	475	0
TCGA-COADREAD	TCGA-CK-4952-01	8.2168	475	0
TCGA-COAD	TCGA-G4-6309-01	7.6739	2600	0
TCGA-COADREAD	TCGA-G4-6309-01	7.6739	2600	0
TCGA-LGG	TCGA-EZ-7264-01	6.6565	1201	0
TCGA-GBMLGG	TCGA-EZ-7264-01	6.6565	1201	0
TCGA-THYM	TCGA-X7-A8M0-01	6.9728	441	0
TCGA-THCA	TCGA-E8-A433-01	6.2216	951	0
TCGA-LUAD	TCGA-55-8615-01	7.1708	446	0
TCGA-PAAD	TCGA-HZ-A4BK-01	7.1079	657	0
TCGA-THCA	TCGA-EL-A3GQ-01	6.8542	1528	0
TCGA-LUAD	TCGA-MP-A4TF-01	7.3925	336	1
TCGA-BLCA	TCGA-G2-A2EO-01	7.0299	1804	0
TCGA-HNSC	TCGA-D6-A6EO-01	7.3112	759	0
TCGA-LIHC	TCGA-RC-A7SF-01	5.88	579	0
TCGA-SKCM-P	TCGA-EB-A24C-01	7.1439	632	0
TCGA-SKCM	TCGA-EB-A24C-01	7.1439	632	0
TCGA-KIRC	TCGA-AK-3443-01	5.682	1423	0
TCGA-KIPAN	TCGA-AK-3443-01	5.682	1423	0
TCGA-BRCA	TCGA-A7-A0CJ-01	7.333	931	0
TCGA-LGG	TCGA-CS-6666-01	6.6461	1428	0
TCGA-GBMLGG	TCGA-CS-6666-01	6.6461	1428	0
TCGA-KIRC	TCGA-BP-4992-01	6.0815	501	0
TCGA-KIPAN	TCGA-BP-4992-01	6.0815	501	0
TCGA-COAD	TCGA-CM-5868-01	7.4439	518	0
TCGA-COADREAD	TCGA-CM-5868-01	7.4439	518	0
TCGA-UVM	TCGA-WC-A885-01	6.6238	686	0
TCGA-UCEC	TCGA-D1-A3DA-01	7.3223	483	0
TCGA-LUAD	TCGA-55-6979-01	6.3576	237	1
TCGA-KIRP	TCGA-P4-AAVO-01	6.0374	2400	0
TCGA-KIPAN	TCGA-P4-AAVO-01	6.0374	2400	0
TCGA-LUSC	TCGA-NC-A5HK-01	7.2966	128	0
TCGA-STAD	TCGA-VQ-A91Z-01	7.8774	1690	0
TCGA-STES	TCGA-VQ-A91Z-01	7.8774	1690	0
TCGA-SARC	TCGA-DX-A8BR-01	7.0046	4573	0
TCGA-THCA	TCGA-BJ-A291-01	6.2479	696	0
TCGA-CESC	TCGA-IR-A3LH-01	7.3164	2394	0
TCGA-KICH	TCGA-KO-8410-01	6.0518	3136	0
TCGA-KIPAN	TCGA-KO-8410-01	6.0518	3136	0
TCGA-BRCA	TCGA-BH-A0H0-01	7.4884	461	0
TCGA-ESCA	TCGA-LN-A4A9-01	7.2039	351	1
TCGA-STES	TCGA-LN-A4A9-01	7.2039	351	1
TCGA-BRCA	TCGA-LL-A5YO-01	6.914	440	0
TCGA-LUAD	TCGA-86-A4JF-01	7.5082	737	1
TCGA-READ	TCGA-DC-6156-01	7.4482	943	0
TCGA-COADREAD	TCGA-DC-6156-01	7.4482	943	0
TCGA-PRAD	TCGA-QU-A6IP-01	6.6445	2620	0
TCGA-UCEC	TCGA-FI-A3PV-01	7.1226	1249	1
TCGA-PRAD	TCGA-V1-A9O9-01	6.8938	2870	0
TCGA-SKCM-M	TCGA-FS-A1Z3-06	7.5365	636	1
TCGA-SKCM	TCGA-FS-A1Z3-06	7.5365	636	1
TCGA-STAD	TCGA-VQ-A8PH-01	8.0991	389	1
TCGA-STES	TCGA-VQ-A8PH-01	8.0991	389	1
TCGA-BRCA	TCGA-AC-A6IX-01	6.7267	373	0
TCGA-BLCA	TCGA-XF-A8HH-01	6.9433	57	1
TCGA-SKCM-P	TCGA-EB-A551-01	6.9205	590	0
TCGA-SKCM	TCGA-EB-A551-01	6.9205	590	0
TCGA-THCA	TCGA-EL-A4K2-01	6.9124	928	0
TCGA-LGG	TCGA-HW-7491-01	6.0273	2078	0
TCGA-GBMLGG	TCGA-HW-7491-01	6.0273	2078	0
TCGA-SKCM-M	TCGA-FS-A1ZD-06	7.4077	1628	1
TCGA-SKCM	TCGA-FS-A1ZD-06	7.4077	1628	1
TCGA-LUAD	TCGA-86-7701-01	6.7432	947	0
TCGA-PRAD	TCGA-EJ-A8FO-01	6.859	282	0
TCGA-LUAD	TCGA-62-8398-01	7.3855	444	0
TCGA-KIRC	TCGA-A3-3307-01	7.059	1436	0
TCGA-KIPAN	TCGA-A3-3307-01	7.059	1436	0
TCGA-KIRC	TCGA-A3-3320-01	7.1536	1508	0
TCGA-KIPAN	TCGA-A3-3320-01	7.1536	1508	0
TCGA-THCA	TCGA-EM-A3O7-01	6.8879	223	0
TCGA-SKCM-M	TCGA-D3-A8GP-06	7.3447	4646	0
TCGA-SKCM	TCGA-D3-A8GP-06	7.3447	4646	0
TCGA-LUAD	TCGA-L9-A443-01	6.3132	193	0
TCGA-KIRC	TCGA-CZ-5469-01	6.9021	946	1
TCGA-KIPAN	TCGA-CZ-5469-01	6.9021	946	1
TCGA-LGG	TCGA-S9-A6U1-01	6.44	785	0
TCGA-GBMLGG	TCGA-S9-A6U1-01	6.44	785	0
TCGA-BRCA	TCGA-A2-A04Y-01	6.9023	1099	0
TCGA-SKCM-M	TCGA-D3-A2JF-06	6.7568	1888	0
TCGA-SKCM	TCGA-D3-A2JF-06	6.7568	1888	0
TCGA-LUSC	TCGA-66-2767-01	6.615	61	0
TCGA-LIHC	TCGA-MR-A520-01	5.3183	229	0
TCGA-THYM	TCGA-X7-A8M4-01	7.3846	3808	0
TCGA-BLCA	TCGA-FD-A3B7-01	7.2742	122	1
TCGA-LGG	TCGA-E1-5307-01	6.2627	1762	1
TCGA-GBMLGG	TCGA-E1-5307-01	6.2627	1762	1
TCGA-LUAD	TCGA-78-8660-01	7.541	321	1
TCGA-LGG	TCGA-DU-A76L-01	6.7665	814	1
TCGA-GBMLGG	TCGA-DU-A76L-01	6.7665	814	1
TCGA-CESC	TCGA-C5-A1M9-01	7.6928	1065	1
TCGA-KICH	TCGA-KL-8325-01	6.5281	725	0
TCGA-KIPAN	TCGA-KL-8325-01	6.5281	725	0
TCGA-LGG	TCGA-HW-7495-01	5.7295	1078	0
TCGA-GBMLGG	TCGA-HW-7495-01	5.7295	1078	0
TCGA-BLCA	TCGA-K4-A3WU-01	6.8837	105	0
TCGA-READ	TCGA-AG-4021-01	7.5001	121	1
TCGA-COADREAD	TCGA-AG-4021-01	7.5001	121	1
TCGA-BRCA	TCGA-E2-A156-01	7.7169	726	0
TCGA-LGG	TCGA-CS-6669-01	3.6971	1494	0
TCGA-GBMLGG	TCGA-CS-6669-01	3.6971	1494	0
TCGA-THCA	TCGA-EL-A3GW-01	7.2519	1527	0
TCGA-THCA	TCGA-EM-A2CL-01	6.7049	401	0
TCGA-BLCA	TCGA-CF-A47V-01	7.4348	379	0
TCGA-BRCA	TCGA-AR-A24R-01	7.153	3430	0
TCGA-MESO	TCGA-3H-AB3O-01	6.6398	1302	1
TCGA-PRAD	TCGA-J4-A67L-01	6.2589	770	0
TCGA-LGG	TCGA-HT-7481-01	5.4182	2918	0
TCGA-GBMLGG	TCGA-HT-7481-01	5.4182	2918	0
TCGA-LUSC	TCGA-NC-A5HO-01	7.0503	1336	0
TCGA-SARC	TCGA-QQ-A5VA-01	6.493	550	1
TCGA-UCEC	TCGA-AJ-A3BG-01	7.04	550	0
TCGA-SKCM-P	TCGA-BF-A1PZ-01	7.6455	853	0
TCGA-SKCM	TCGA-BF-A1PZ-01	7.6455	853	0
TCGA-PRAD	TCGA-XQ-A8TA-01	7.1134	146	1
TCGA-LGG	TCGA-DU-8163-01	6.1985	629	0
TCGA-GBMLGG	TCGA-DU-8163-01	6.1985	629	0
TCGA-SKCM-M	TCGA-FS-A4FB-06	7.0727	813	1
TCGA-SKCM	TCGA-FS-A4FB-06	7.0727	813	1
TCGA-BRCA	TCGA-D8-A1JP-01	7.4325	639	0
TCGA-BRCA	TCGA-E2-A1IK-01	6.6863	1800	0
TCGA-OV	TCGA-24-0970-01	7.0462	354	1
TCGA-LUSC	TCGA-43-6773-01	6.2434	116	0
TCGA-OV	TCGA-24-1424-01	7.2891	183	0
TCGA-SKCM-M	TCGA-EB-A44Q-06	7.2503	422	0
TCGA-SKCM	TCGA-EB-A44Q-06	7.2503	422	0
TCGA-BRCA	TCGA-AN-A0FS-01	7.2611	210	0
TCGA-LUSC	TCGA-77-8154-01	7.6283	1841	0
TCGA-TGCT	TCGA-2G-AAFM-01	7.2212	503	0
TCGA-THCA	TCGA-DJ-A3V5-01	6.7746	584	0
TCGA-SKCM-M	TCGA-WE-A8ZX-06	7.5231	1089	0
TCGA-SKCM	TCGA-WE-A8ZX-06	7.5231	1089	0
TCGA-BRCA	TCGA-AC-A3TM-01	6.9054	762	0
TCGA-THCA	TCGA-DJ-A2Q3-01	6.5906	1224	0
TCGA-HNSC	TCGA-CV-7446-01	7.5202	1093	1
TCGA-DLBC	TCGA-G8-6909-01	6.3843	3553	0
TCGA-STAD	TCGA-VQ-A91N-01	8.239	570	1
TCGA-STES	TCGA-VQ-A91N-01	8.239	570	1
TCGA-BLCA	TCGA-DK-A3X1-01	6.7592	2009	0
TCGA-KIRP	TCGA-B9-A5W7-01	6.8708	585	0
TCGA-KIPAN	TCGA-B9-A5W7-01	6.8708	585	0
TCGA-BRCA	TCGA-AR-A2LE-01	6.6535	5062	0
TCGA-COAD	TCGA-AD-6964-01	7.3979	331	1
TCGA-COADREAD	TCGA-AD-6964-01	7.3979	331	1
TCGA-LUSC	TCGA-37-A5EL-01	6.9871	1143	1
TCGA-GBM	TCGA-26-1442-01	5.2525	953	0
TCGA-GBMLGG	TCGA-26-1442-01	5.2525	953	0
TCGA-KIRC	TCGA-B0-4688-01	7.1579	101	1
TCGA-KIPAN	TCGA-B0-4688-01	7.1579	101	1
TCGA-BRCA	TCGA-BH-A0HK-01	6.5338	178	0
TCGA-PRAD	TCGA-J4-A67O-01	5.6404	839	0
TCGA-COAD	TCGA-G4-6295-01	7.8818	254	0
TCGA-COADREAD	TCGA-G4-6295-01	7.8818	254	0
TCGA-STAD	TCGA-RD-A8NB-01	7.5407	513	1
TCGA-STES	TCGA-RD-A8NB-01	7.5407	513	1
TCGA-KIRC	TCGA-B2-4101-01	6.6113	648	0
TCGA-KIPAN	TCGA-B2-4101-01	6.6113	648	0
TCGA-KIRP	TCGA-BQ-7048-01	6.3685	2839	0
TCGA-KIPAN	TCGA-BQ-7048-01	6.3685	2839	0
TCGA-CESC	TCGA-DG-A2KJ-01	6.394	2893	0
TCGA-LUAD	TCGA-67-6215-01	7.0728	174	0
TCGA-LUAD	TCGA-55-A490-01	8.599	99	0
TCGA-BLCA	TCGA-4Z-AA81-01	7.4145	1270	0
TCGA-BLCA	TCGA-CF-A3MG-01	7.4025	369	0
TCGA-PCPG	TCGA-QR-A708-01	6.1414	35	0
TCGA-OV	TCGA-24-2023-01	7.1363	1364	1
TCGA-STAD	TCGA-BR-A4PE-01	7.586	621	0
TCGA-STES	TCGA-BR-A4PE-01	7.586	621	0
TCGA-COAD	TCGA-NH-A50T-01	7.2935	553	0
TCGA-COADREAD	TCGA-NH-A50T-01	7.2935	553	0
TCGA-THCA	TCGA-FE-A237-01	6.9363	3431	0
TCGA-TGCT	TCGA-2G-AAFI-01	8.014	675	0
TCGA-LIHC	TCGA-ZS-A9CE-01	6.3511	1241	0
TCGA-BRCA	TCGA-AR-A250-01	7.1431	2707	0
TCGA-PRAD	TCGA-HC-7230-01	7.2179	1001	0
TCGA-BLCA	TCGA-S5-AA26-01	7.0632	503	0
TCGA-LGG	TCGA-HT-8110-01	6.4077	419	0
TCGA-GBMLGG	TCGA-HT-8110-01	6.4077	419	0
TCGA-BRCA	TCGA-D8-A1JG-01	7.2404	1612	0
TCGA-KICH	TCGA-KL-8337-01	6.2449	1364	0
TCGA-KIPAN	TCGA-KL-8337-01	6.2449	1364	0
TCGA-BLCA	TCGA-ZF-A9R4-01	7.1975	921	0
TCGA-BLCA	TCGA-GC-A3OO-01	6.9713	481	0
TCGA-COAD	TCGA-D5-5539-01	7.1521	596	0
TCGA-COADREAD	TCGA-D5-5539-01	7.1521	596	0
TCGA-SKCM-P	TCGA-GN-A26C-01	6.8818	821	1
TCGA-SKCM	TCGA-GN-A26C-01	6.8818	821	1
TCGA-PRAD	TCGA-HC-A6AL-01	6.57	67	0
TCGA-LUAD	TCGA-69-7974-01	7.2362	184	0
TCGA-BRCA	TCGA-C8-A134-01	7.8153	383	0
TCGA-SKCM-M	TCGA-D3-A1Q7-06	7.591	4053	0
TCGA-SKCM	TCGA-D3-A1Q7-06	7.591	4053	0
TCGA-KIRC	TCGA-AK-3429-01	6.126	3328	0
TCGA-KIPAN	TCGA-AK-3429-01	6.126	3328	0
TCGA-SARC	TCGA-JV-A5VF-01	7.5785	32	1
TCGA-READ	TCGA-AH-6903-01	7.1096	592	0
TCGA-COADREAD	TCGA-AH-6903-01	7.1096	592	0
TCGA-KIRP	TCGA-5P-A9K8-01	6.4941	1309	0
TCGA-KIPAN	TCGA-5P-A9K8-01	6.4941	1309	0
TCGA-UCEC	TCGA-BS-A0V4-01	6.0697	1810	0
TCGA-ESCA	TCGA-Z6-A9VB-01	8.1845	40	0
TCGA-STES	TCGA-Z6-A9VB-01	8.1845	40	0
TCGA-CESC	TCGA-Q1-A5R3-01	6.5511	485	0
TCGA-BRCA	TCGA-AC-A62V-01	6.9154	348	1
TCGA-LIHC	TCGA-G3-AAV0-01	5.6103	476	0
TCGA-THCA	TCGA-ET-A39O-01	6.5177	3059	0
TCGA-PRAD	TCGA-G9-6369-01	6.3025	1215	0
TCGA-THCA	TCGA-FK-A3S3-01	6.8051	2162	0
TCGA-PAAD	TCGA-FB-AAQ1-01	6.9041	123	1
TCGA-PRAD	TCGA-HC-7211-01	7.5057	1221	0
TCGA-KIRP	TCGA-2Z-A9J3-01	7.0688	1771	1
TCGA-KIPAN	TCGA-2Z-A9J3-01	7.0688	1771	1
TCGA-SKCM-M	TCGA-GF-A3OT-06	7.6061	301	0
TCGA-SKCM	TCGA-GF-A3OT-06	7.6061	301	0
TCGA-BRCA	TCGA-GM-A3XN-01	6.9566	2019	0
TCGA-LUAD	TCGA-49-AAR4-01	6.9237	879	1
TCGA-MESO	TCGA-UD-AAC7-01	7.293	406	1
TCGA-PRAD	TCGA-4L-AA1F-01	6.8449	350	0
TCGA-KIRC	TCGA-AK-3433-01	5.7975	3409	0
TCGA-KIPAN	TCGA-AK-3433-01	5.7975	3409	0
TCGA-LIHC	TCGA-DD-AAD8-01	6.3105	1219	0
TCGA-BRCA	TCGA-AO-A129-01	7.1257	3286	0
TCGA-HNSC	TCGA-P3-A6T3-01	7.432	577	1
TCGA-SKCM-M	TCGA-ER-A19G-06	7.296	9188	0
TCGA-SKCM	TCGA-ER-A19G-06	7.296	9188	0
TCGA-STAD	TCGA-R5-A7ZR-01	7.0113	185	1
TCGA-STES	TCGA-R5-A7ZR-01	7.0113	185	1
TCGA-HNSC	TCGA-CV-A468-01	7.0183	464	0
TCGA-PRAD	TCGA-EJ-5516-01	6.6681	1889	0
TCGA-SARC	TCGA-DX-A8BV-01	7.5624	1845	1
TCGA-UCEC	TCGA-EY-A2OO-01	7.6631	1392	0
TCGA-BLCA	TCGA-YF-AA3L-01	6.7158	364	0
TCGA-STAD	TCGA-BR-8059-01	7.5018	439	0
TCGA-STES	TCGA-BR-8059-01	7.5018	439	0
TCGA-THCA	TCGA-EL-A3MZ-01	6.5161	1597	0
TCGA-STAD	TCGA-CD-8527-01	7.0645	218	1
TCGA-STES	TCGA-CD-8527-01	7.0645	218	1
TCGA-LIHC	TCGA-DD-AACU-01	6.4431	1567	0
TCGA-BRCA	TCGA-BH-A1F8-01	7.0474	763	1
TCGA-LIHC	TCGA-G3-AAV3-01	6.3861	412	0
TCGA-HNSC	TCGA-QK-A6V9-01	7.9172	833	0
TCGA-KIRC	TCGA-A3-3306-01	6.2281	1120	0
TCGA-KIPAN	TCGA-A3-3306-01	6.2281	1120	0
TCGA-BLCA	TCGA-XF-A9SJ-01	6.5588	98	1
TCGA-BRCA	TCGA-D8-A1JK-01	7.2571	612	0
TCGA-SKCM-M	TCGA-WE-A8ZO-06	7.4193	2145	0
TCGA-SKCM	TCGA-WE-A8ZO-06	7.4193	2145	0
TCGA-BLCA	TCGA-ZF-A9R0-01	6.5997	680	1
TCGA-LGG	TCGA-RY-A840-01	5.7668	854	0
TCGA-GBMLGG	TCGA-RY-A840-01	5.7668	854	0
TCGA-BRCA	TCGA-A8-A08X-01	6.7611	1308	0
TCGA-BRCA	TCGA-AR-A2LN-01	7.3331	1161	0
TCGA-READ	TCGA-EI-6882-01	7.9958	262	0
TCGA-COADREAD	TCGA-EI-6882-01	7.9958	262	0
TCGA-THCA	TCGA-MK-A4N6-01	6.7274	1098	0
TCGA-COAD	TCGA-AZ-4315-01	7.0955	1776	0
TCGA-COADREAD	TCGA-AZ-4315-01	7.0955	1776	0
TCGA-LIHC	TCGA-DD-AADO-01	5.5217	453	0
TCGA-STAD	TCGA-3M-AB46-01	7.0296	1765	0
TCGA-STES	TCGA-3M-AB46-01	7.0296	1765	0
TCGA-SARC	TCGA-DX-A48R-01	7.0604	805	0
TCGA-LGG	TCGA-VM-A8C9-01	5.3715	1314	0
TCGA-GBMLGG	TCGA-VM-A8C9-01	5.3715	1314	0
TCGA-SKCM-P	TCGA-EB-A85I-01	6.4733	362	0
TCGA-SKCM	TCGA-EB-A85I-01	6.4733	362	0
TCGA-SARC	TCGA-DX-A7ET-01	6.7965	463	0
TCGA-KIRC	TCGA-CJ-4869-01	6.688	2554	0
TCGA-KIPAN	TCGA-CJ-4869-01	6.688	2554	0
TCGA-COAD	TCGA-AA-3506-01	7.6297	1765	0
TCGA-COADREAD	TCGA-AA-3506-01	7.6297	1765	0
TCGA-PAAD	TCGA-3A-A9I9-01	6.3524	634	1
TCGA-KIRP	TCGA-A4-8098-01	6.2634	896	0
TCGA-KIPAN	TCGA-A4-8098-01	6.2634	896	0
TCGA-STAD	TCGA-BR-8286-01	7.7871	895	0
TCGA-STES	TCGA-BR-8286-01	7.7871	895	0
TCGA-PAAD	TCGA-F2-6879-01	6.9609	334	1
TCGA-STAD	TCGA-IN-A7NT-01	7.3231	323	0
TCGA-STES	TCGA-IN-A7NT-01	7.3231	323	0
TCGA-LIHC	TCGA-G3-A3CJ-01	5.4313	594	0
TCGA-PCPG	TCGA-SR-A6MU-01	6.1004	3362	0
TCGA-PRAD	TCGA-ZG-A9LM-01	6.615	378	0
TCGA-SKCM-P	TCGA-EB-A4OZ-01	6.626	620	0
TCGA-SKCM	TCGA-EB-A4OZ-01	6.626	620	0
TCGA-THCA	TCGA-J8-A3YD-01	6.8124	968	0
TCGA-LIHC	TCGA-DD-A73C-01	5.8562	701	0
TCGA-OV	TCGA-61-2111-01	7.3388	3825	0
TCGA-STAD	TCGA-R5-A7ZI-01	6.3418	2267	0
TCGA-STES	TCGA-R5-A7ZI-01	6.3418	2267	0
TCGA-UCEC	TCGA-AJ-A3NC-01	7.0145	1125	0
TCGA-THYM	TCGA-4V-A9QI-01	7.1795	2936	0
TCGA-BLCA	TCGA-BT-A42C-01	7.3857	873	0
TCGA-PCPG	TCGA-QR-A70K-01	6.8278	274	0
TCGA-LIHC	TCGA-G3-A25X-01	5.8994	1779	0
TCGA-KIRC	TCGA-BP-4983-01	7.5449	1413	0
TCGA-KIPAN	TCGA-BP-4983-01	7.5449	1413	0
TCGA-KIRC	TCGA-B4-5378-01	7.1736	175	0
TCGA-KIPAN	TCGA-B4-5378-01	7.1736	175	0
TCGA-CESC	TCGA-HG-A2PA-01	7.0379	773	1
TCGA-BRCA	TCGA-A8-A09A-01	7.0477	304	0
TCGA-KIRP	TCGA-BQ-7056-01	6.4024	612	0
TCGA-KIPAN	TCGA-BQ-7056-01	6.4024	612	0
TCGA-STAD	TCGA-BR-6801-01	6.9937	1223	0
TCGA-STES	TCGA-BR-6801-01	6.9937	1223	0
TCGA-KIRP	TCGA-F9-A4JJ-01	7.2575	325	1
TCGA-KIPAN	TCGA-F9-A4JJ-01	7.2575	325	1
TCGA-HNSC	TCGA-CV-A6K2-01	7.1265	317	1
TCGA-KIRP	TCGA-5P-A9JZ-01	6.6684	2744	0
TCGA-KIPAN	TCGA-5P-A9JZ-01	6.6684	2744	0
TCGA-HNSC	TCGA-HD-A6I0-01	6.4728	210	0
TCGA-UVM	TCGA-WC-A87W-01	7.0257	1703	0
TCGA-DLBC	TCGA-FA-A82F-01	7.4066	427	0
TCGA-THCA	TCGA-EM-A3AR-01	6.9431	1133	0
TCGA-LGG	TCGA-HW-8319-01	6.1438	1209	1
TCGA-GBMLGG	TCGA-HW-8319-01	6.1438	1209	1
TCGA-BRCA	TCGA-E2-A1IJ-01	6.8898	865	0
TCGA-SARC	TCGA-HB-A3L4-01	7.4604	1061	1
TCGA-KIRP	TCGA-G7-6792-01	7.2432	2765	0
TCGA-KIPAN	TCGA-G7-6792-01	7.2432	2765	0
TCGA-OV	TCGA-31-1946-01	7.7123	918	0
TCGA-PAAD	TCGA-IB-AAUV-01	6.705	404	0
TCGA-LIHC	TCGA-BD-A2L6-01	6.0108	1363	0
TCGA-KIRC	TCGA-B2-5639-01	6.8642	1003	1
TCGA-KIPAN	TCGA-B2-5639-01	6.8642	1003	1
TCGA-KIRC	TCGA-GK-A6C7-01	7.4408	61	0
TCGA-KIPAN	TCGA-GK-A6C7-01	7.4408	61	0
TCGA-SKCM-M	TCGA-EE-A2MS-06	7.2336	4942	0
TCGA-SKCM	TCGA-EE-A2MS-06	7.2336	4942	0
TCGA-THCA	TCGA-EL-A4K7-01	6.7552	1251	0
TCGA-PRAD	TCGA-ZG-A9LY-01	6.7306	370	0
TCGA-UCEC	TCGA-B5-A1MW-01	8.0391	447	0
TCGA-THCA	TCGA-DJ-A2PQ-01	6.79	1077	0
TCGA-ACC	TCGA-OR-A5KO-01	7.5598	1414	0
TCGA-BRCA	TCGA-A8-A08O-01	7.3996	943	0
TCGA-OV	TCGA-13-0720-01	6.5195	1355	1
TCGA-THCA	TCGA-EM-A22M-01	6.3285	442	0
TCGA-THCA	TCGA-EM-A3FO-01	7.0185	532	0
TCGA-UVM	TCGA-V4-A9ES-01	6.5902	1511	0
TCGA-PRAD	TCGA-J4-A67K-01	5.9418	1004	0
TCGA-KIRC	TCGA-A3-3359-01	6.3918	2504	0
TCGA-KIPAN	TCGA-A3-3359-01	6.3918	2504	0
TCGA-LGG	TCGA-HT-7482-01	5.8843	3253	0
TCGA-GBMLGG	TCGA-HT-7482-01	5.8843	3253	0
TCGA-HNSC	TCGA-CV-6962-01	7.4386	126	0
TCGA-CESC	TCGA-EA-A50E-01	7.1223	227	1
TCGA-LUSC	TCGA-21-1082-01	7.3599	3644	0
TCGA-LUAD	TCGA-35-4123-01	5.931	182	0
TCGA-BRCA	TCGA-A2-A4RY-01	7.2756	648	0
TCGA-LGG	TCGA-QH-A6CW-01	6.5024	414	0
TCGA-GBMLGG	TCGA-QH-A6CW-01	6.5024	414	0
TCGA-HNSC	TCGA-UF-A7JT-01	7.3396	993	1
TCGA-SARC	TCGA-DX-AB3A-01	7.108	978	1
TCGA-KIRP	TCGA-AL-3466-01	6.826	293	1
TCGA-KIPAN	TCGA-AL-3466-01	6.826	293	1
TCGA-STAD	TCGA-R5-A805-01	6.8928	281	1
TCGA-STES	TCGA-R5-A805-01	6.8928	281	1
TCGA-BRCA	TCGA-A2-A0SY-01	7.0094	1347	0
TCGA-BRCA	TCGA-AC-A8OP-01	7.6985	614	0
TCGA-LUSC	TCGA-98-A53J-01	6.5595	630	0
TCGA-PRAD	TCGA-VP-A87B-01	6.4326	2722	0
TCGA-BRCA	TCGA-EW-A1PA-01	7.4379	575	0
TCGA-BRCA	TCGA-AO-A126-01	7.3514	3307	0
TCGA-THCA	TCGA-EM-A4FF-01	6.7533	2573	0
TCGA-KIRC	TCGA-CJ-4878-01	7.646	2186	0
TCGA-KIPAN	TCGA-CJ-4878-01	7.646	2186	0
TCGA-PRAD	TCGA-CH-5792-01	6.8989	91	0
TCGA-LIHC	TCGA-DD-A11D-01	6.204	1560	1
TCGA-BRCA	TCGA-AO-A0J6-01	7.0756	1140	0
TCGA-LGG	TCGA-DU-5870-01	5.8342	5546	0
TCGA-GBMLGG	TCGA-DU-5870-01	5.8342	5546	0
TCGA-OV	TCGA-24-2033-01	7.0388	562	1
TCGA-COAD	TCGA-G4-6314-01	7.5915	1093	0
TCGA-COADREAD	TCGA-G4-6314-01	7.5915	1093	0
TCGA-BRCA	TCGA-EW-A6SB-01	6.0068	760	0
TCGA-SKCM-M	TCGA-D3-A3C8-06	7.3113	1409	0
TCGA-SKCM	TCGA-D3-A3C8-06	7.3113	1409	0
TCGA-UCEC	TCGA-SJ-A6ZI-01	7.6444	631	0
TCGA-CESC	TCGA-EA-A556-01	7.5914	453	0
TCGA-SARC	TCGA-MJ-A68J-01	6.857	547	0
TCGA-LIHC	TCGA-DD-A118-01	6.0965	3437	0
TCGA-CESC	TCGA-VS-A9V3-01	7.4108	540	0
TCGA-COAD	TCGA-AU-6004-01	7.6879	824	0
TCGA-COADREAD	TCGA-AU-6004-01	7.6879	824	0
TCGA-SARC	TCGA-KD-A5QS-01	7.4568	1941	1
TCGA-KIRP	TCGA-BQ-7061-01	6.7245	218	0
TCGA-KIPAN	TCGA-BQ-7061-01	6.7245	218	0
TCGA-UCEC	TCGA-A5-A3LP-01	6.4124	455	0
TCGA-LUSC	TCGA-63-A5MJ-01	7.6233	1824	0
TCGA-BRCA	TCGA-EW-A2FV-01	7.4868	788	0
TCGA-UVM	TCGA-V4-A9E8-01	7.1184	808	1
TCGA-HNSC	TCGA-CR-7379-01	7.9753	1036	0
TCGA-PRAD	TCGA-TP-A8TV-01	6.5896	610	0
TCGA-COAD	TCGA-AY-6386-01	7.365	542	0
TCGA-COADREAD	TCGA-AY-6386-01	7.365	542	0
TCGA-STAD	TCGA-D7-A74A-01	7.1928	607	0
TCGA-STES	TCGA-D7-A74A-01	7.1928	607	0
TCGA-LGG	TCGA-TM-A84S-01	5.738	454	0
TCGA-GBMLGG	TCGA-TM-A84S-01	5.738	454	0
TCGA-KIRC	TCGA-B0-4701-01	7.0529	238	1
TCGA-KIPAN	TCGA-B0-4701-01	7.0529	238	1
TCGA-GBM	TCGA-26-5136-01	6.4889	577	1
TCGA-GBMLGG	TCGA-26-5136-01	6.4889	577	1
TCGA-BLCA	TCGA-GU-A42P-01	7.8029	332	0
TCGA-BRCA	TCGA-AO-A03R-01	7.0802	2091	0
TCGA-KIRP	TCGA-G7-6796-01	6.4561	2173	0
TCGA-KIPAN	TCGA-G7-6796-01	6.4561	2173	0
TCGA-BRCA	TCGA-E9-A54X-01	7.1779	727	0
TCGA-BRCA	TCGA-AO-A0JB-01	6.1776	1542	0
TCGA-BLCA	TCGA-2F-A9KP-01	7.9471	364	1
TCGA-UVM	TCGA-V4-A9F7-01	6.3061	1256	0
TCGA-BRCA	TCGA-AC-A3W5-01	7.2288	504	0
TCGA-COAD	TCGA-A6-5661-01	6.4024	1020	0
TCGA-COADREAD	TCGA-A6-5661-01	6.4024	1020	0
TCGA-THCA	TCGA-DJ-A1QF-01	7.2114	931	0
TCGA-UCS	TCGA-N8-A4PO-01	6.9621	781	0
TCGA-KICH	TCGA-KL-8338-01	6.0762	2633	0
TCGA-KIPAN	TCGA-KL-8338-01	6.0762	2633	0
TCGA-ESCA	TCGA-LN-A4A2-01	8.2604	380	0
TCGA-STES	TCGA-LN-A4A2-01	8.2604	380	0
TCGA-PRAD	TCGA-J4-A83N-01	6.4123	992	0
TCGA-THYM	TCGA-XM-A8R9-01	7.1318	1488	0
TCGA-PCPG	TCGA-WB-A80K-01	6.533	1255	0
TCGA-COAD	TCGA-CA-5797-01	7.895	383	0
TCGA-COADREAD	TCGA-CA-5797-01	7.895	383	0
TCGA-SKCM-M	TCGA-D3-A3C7-06	7.1069	1429	0
TCGA-SKCM	TCGA-D3-A3C7-06	7.1069	1429	0
TCGA-KIRP	TCGA-AL-3467-01	7.4251	2135	0
TCGA-KIPAN	TCGA-AL-3467-01	7.4251	2135	0
TCGA-BRCA	TCGA-A7-A13G-01	5.9578	718	0
TCGA-UVM	TCGA-V4-A9EW-01	6.7934	1211	0
TCGA-GBM	TCGA-14-1034-01	7.358	485	1
TCGA-GBMLGG	TCGA-14-1034-01	7.358	485	1
TCGA-THCA	TCGA-EM-A4FQ-01	6.4226	683	0
TCGA-BRCA	TCGA-AR-A1AS-01	7.3896	1150	0
[truncated: 9,564 more rows]

## Sheet: Meth_correlation_genes
				m1A_writer	m1A_writer	m1A_writer	m1A_writer	m1A_reader	m1A_reader	m1A_reader	m1A_reader	m1A_eraser	m1A_eraser	m5C_writer	m5C_writer	m5C_writer	m5C_writer	m5C_writer	m5C_writer	m5C_writer	m5C_writer	m5C_writer	m5C_writer	m5C_writer	m5C_eraser	m5C_reader	m6A_writer	m6A_writer	m6A_writer	m6A_writer	m6A_writer	m6A_writer	m6A_writer	m6A_writer	m6A_eraser	m6A_eraser	m6A_reader	m6A_reader	m6A_reader	m6A_reader	m6A_reader	m6A_reader	m6A_reader	m6A_reader	m6A_reader	m6A_reader	m6A_reader
				TRMT10C	TRMT61B	TRMT6	TRMT61A	YTHDF1	YTHDF2	YTHDF3	YTHDC1	ALKBH1	ALKBH3	NOP2	NSUN2	NSUN3	NSUN4	NSUN5	NSUN6	NSUN7	DNMT1	TRDMT1	DNMT3A	DNMT3B	TET2	ALYREF	METTL3	METTL14	RBM15	RBM15B	WTAP	KIAA1429	CBLL1	ZC3H13	ALKBH5	FTO	YTHDC1	YTHDC2	YTHDF1	YTHDF2	YTHDF3	IGF2BP1	HNRNPA2B1	HNRNPC	FMR1	LRPPRC	ELAVL1
GBM	Tumor	TCGA-19-1787-01	6.64052	3.9983	3.2127	3.3675	3.7518	4.9031	5.6739	3.9626	5.0383	3.8187	4.4919	5.3951	4.5516	2.2082	3.6497	4.8655	2.8422	1.7009	6.1316	2.1798	3.0163	-0.5543	1.3283	7.2312	4.3555	3.3492	2.0111	4.1343	6.5784	4.7608	4.3674	3.5682	5.6361	4.8167	5.0383	2.1444	4.9031	5.6739	3.9626	-3.458	9.3183	9.0338	5.691	5.2536	5.9336
GBM	Tumor	TCGA-06-5412-01	6.14511	4.3667	4.2235	3.2885	3.1797	5.0549	5.2525	4.1409	4.4423	3.0688	4.8177	4.3463	4.7496	2.2019	3.7846	4.0019	1.6187	0.4967	4.3421	1.0363	2.7847	-1.0262	1.0779	6.3228	4.582	3.0637	0.6145	3.3192	6.9047	4.391	3.4143	2.5634	5.3674	5.1107	4.4423	2.2051	5.0549	5.2525	4.1409	-9.9658	8.9107	8.7371	3.7116	4.7203	5.2273
GBM	Tumor	TCGA-12-5299-01	6.40224	4.6218	4.443	3.0376	3.4102	5.2468	5.4631	4.4108	4.9016	3.4856	4.546	4.1294	4.4095	2.3536	3.6347	5.0562	1.0847	0.099	4.4283	0.8164	2.7161	-1.4699	1.2576	6.753	5.0291	3.208	1.0079	3.8218	6.0706	4.8064	4.4162	3.2435	5.7052	5.4951	4.9016	1.6374	5.2468	5.4631	4.4108	-4.6082	9.0771	9.4636	3.7794	5.1724	5.5626
GBM	Tumor	TCGA-06-2565-01	7.36089	4.7976	3.9022	4.4067	3.9506	5.7369	4.8665	5.1044	5.838	3.6219	4.8022	5.4229	5.5946	2.6647	3.8571	4.562	3.3105	2.2842	6.0781	1.7185	4.1668	1.1117	3.1278	6.3241	6.3225	3.927	1.6558	4.3075	7.0879	4.6566	4.1539	4.3562	5.7632	6.3327	5.838	3.9947	5.7369	4.8665	5.1044	-9.9658	9.7019	9.3142	4.9946	5.3772	5.6445
GBM	Tumor	TCGA-06-2561-01	6.2854	4.0295	4.1128	3.2662	2.8661	5.0414	5.2627	4.3869	4.8929	2.1574	4.3944	5.1676	4.8973	2.496	3.3393	4.5802	2.5462	-0.3383	4.66	1.3225	3.3633	-0.6873	1.9226	5.9336	4.445	3.5073	1.0779	3.5851	5.8483	4.6433	3.9719	3.8769	5.033	5.94	4.8929	3.4856	5.0414	5.2627	4.3869	-9.9658	9.1901	8.3964	4.3938	5.1966	5.2619
GBM	Tumor	TCGA-06-0132-01	5.15707	3.8905	3.4398	2.5536	2.6579	4.5904	4.849	4.3227	4.0824	2.7657	4.5429	3.3421	3.7149	2.2813	3.1765	3.9156	1.4962	-1.2481	3.9041	0.9789	1.9377	-2.0529	0.7832	5.5056	3.5682	2.3788	0.3796	2.7357	7.4669	4.4951	3.2049	2.7931	5.306	5.1478	4.0824	1.8323	4.5904	4.849	4.3227	-9.9658	7.7296	8.261	3.7335	4.9012	4.8445
GBM	Tumor	TCGA-19-2629-01	7.27126	4.3597	4.3406	3.603	3.5815	5.3629	5.6753	4.1285	5.101	2.826	4.7555	4.6983	5.2525	2.8462	3.83	3.1129	2.4883	-5.0116	6.3149	0.6145	2.2237	-0.4719	1.8524	7.1534	4.1252	3.5449	1.1117	4.573	6.6621	5.1538	3.869	3.7992	6.2277	6.5569	5.101	2.6624	5.3629	5.6753	4.1285	-9.9658	9.1347	9.0297	4.3772	5.0251	5.9778
GBM	Tumor	TCGA-06-0238-01	5.8392	4.4926	4.0593	3.3421	2.496	4.5559	5.0777	4.0037	4.4964	3.3206	4.5693	4.298	4.2825	1.9786	2.9281	4.2721	1.7828	0.2881	5.0514	0.7321	2.3704	0.058	1.3051	6.4114	5.0579	2.4412	0.5955	3.0876	6.3051	4.7507	3.2405	2.6873	4.8182	5.0514	4.4964	1.7229	4.5559	5.0777	4.0037	-4.6082	8.986	9.1542	3.9185	4.8793	4.8881
GBM	Tumor	TCGA-06-0749-01	5.68989	3.834	4.0037	2.4675	3.7171	4.6381	4.5311	3.3549	4.4641	2.8219	4.86	4.1103	4.4588	1.4547	2.6918	4.7127	2.2113	0.099	4.6662	0.547	2.2513	-0.9406	0.4657	6.0525	4.4404	2.2753	0.2998	3.1442	6.4207	5.0939	2.9281	2.5188	5.7323	4.8033	4.4641	1.6875	4.6381	4.5311	3.3549	-9.9658	8.7701	8.274	3.5779	4.9883	4.722
GBM	Tumor	TCGA-06-0174-01	7.02759	4.5778	4.3406	3.8621	3.4945	5.2884	5.8217	4.7887	5.1788	3.4804	4.9533	4.4932	4.8324	2.5036	3.5935	4.6583	2.4439	1.6327	5.6818	1.4228	3.5486	0.8164	1.9226	7.2576	5.1656	3.29	1.9564	4.3413	6.619	5.1157	4.8074	3.7291	5.7822	6.1281	5.1788	2.4171	5.2884	5.8217	4.7887	-3.1714	9.599	9.4564	4.2951	5.3399	5.8575
GBM	Tumor	TCGA-06-5410-01	5.84352	3.9792	3.8591	3.1261	2.9544	4.5479	4.9677	3.9365	4.2009	2.8055	4.3385	3.9654	4.425	2.0147	3.3134	4.4067	1.4011	-1.0262	4.0162	0.6425	2.6918	-1.8836	1.2875	5.9194	4.2929	3.0287	0.605	3.2127	7.2369	4.2914	3.0127	3.1311	5.5223	4.4122	4.2009	2.128	4.5479	4.9677	3.9365	-9.9658	8.5471	8.839	3.2065	4.3772	4.943
GBM	Tumor	TCGA-28-2513-01	6.60855	4.0287	4.0454	3.4048	3.7204	6.1283	4.9379	4.1883	4.3349	3.0791	4.6713	3.6254	4.4516	1.7185	3.2282	4.3371	1.4911	1.0293	4.8851	0.6608	2.3953	-0.8599	1.177	6.3014	3.4344	3.1145	0.7748	3.5863	8.031	4.437	3.5839	3.2692	5.8602	5.6259	4.3349	2.2299	6.1283	4.9379	4.1883	-5.5735	8.5962	8.4637	3.4622	4.5856	5.2211
GBM	Tumor	TCGA-76-4929-01	6.14363	4.38	4.84	4.2526	3.3787	5.8652	5.845	4.1604	5.2795	2.5288	4.858	4.8248	5.1744	2.1345	4.0127	5.204	2.5288	0.7916	5.0193	1.1577	3.8136	0.0158	2.4063	7.1325	4.8958	4.1169	1.7273	4.6023	5.6349	5.3049	4.479	2.9984	6.6122	6.845	5.2795	2.7029	5.8652	5.845	4.1604	-6.5064	9.2186	8.856	4.5318	5.537	5.2932
GBM	Tumor	TCGA-06-0645-01	6.68696	4.232	3.7378	3.4197	3.6646	5.7586	5.1851	4.1368	4.6793	3.0163	4.7049	4.497	5.07	2.0912	3.5596	4.5479	1.683	-0.394	5.1306	1.1316	2.7139	-0.3022	1.46	6.3034	4.8778	2.9319	1.0363	3.7215	8.1623	4.5583	3.9478	2.982	5.3463	5.0993	4.6793	2.4805	5.7586	5.1851	4.1368	-5.0116	9.0373	8.8883	3.5682	4.7044	5.2987
GBM	Tumor	TCGA-32-2634-01	7.30325	4.6882	4.7945	4.9594	3.9137	5.779	5.5252	4.7898	5.5261	2.8381	4.8329	5.0781	5.0068	2.7721	3.8739	5.0273	2.824	2.118	6.3479	1.7185	3.7752	2.0218	2.3164	7.4762	4.3979	4.3548	2.5388	4.6815	6.7987	5.1514	4.2111	3.2707	5.6753	6.2561	5.5261	3.2158	5.779	5.5252	4.7898	0.2154	9.4998	9.1322	4.9199	5.4922	5.7661
GBM	Tumor	TCGA-06-0141-01	5.47703	4.5687	3.7193	2.7805	2.236	4.6747	4.8905	3.9746	4.1186	2.5238	4.7356	3.7421	4.5117	2.1444	3.0287	4.1136	2.0183	0.9268	4.6218	0.7146	2.2753	-0.7588	1.2085	5.6554	4.5311	2.5561	0.3796	2.9071	6.7844	4.8243	2.8819	2.3337	5.1506	4.7893	4.1186	2.8341	4.6747	4.8905	3.9746	-2.6349	8.52	7.93	3.6125	5.3306	4.7165
GBM	Tumor	TCGA-06-0125-01	7.47224	4.4257	3.9856	4.3992	3.8788	5.9964	5.7082	4.7965	5.3705	3.449	4.7934	5.5835	5.235	2.7379	3.9838	4.5028	4.1294	2.0673	6.6026	2.0569	3.907	0.8883	2.5313	6.7624	5.9837	3.4331	1.5709	4.5104	7.1258	5.1119	4.6047	3.9719	5.9277	6.3662	5.3705	3.6018	5.9964	5.7082	4.7965	-4.2934	9.9354	9.0455	4.5085	5.4162	6.2298
GBM	Tumor	TCGA-26-1442-01	5.25251	3.8279	3.6827	3.0199	3.4451	4.9704	4.7274	3.83	4.9607	2.6984	3.8591	5.9713	5.1211	1.9749	3.0411	2.4883	3.9645	-3.3076	4.6148	1.4704	2.1925	-0.2845	1.8918	5.4067	5.3989	2.7205	0.8488	3.29	5.738	4.6142	3.4034	3.7825	4.6312	5.7041	4.9607	2.8117	4.9704	4.7274	3.83	-9.9658	8.9606	8.7397	4.4095	5.0215	4.7383
GBM	Tumor	TCGA-26-5136-01	6.48894	4.7751	4.5946	3.4868	3.6623	5.2943	5.4938	4.0348	5.2702	3.2707	4.5559	4.429	5.6171	2.2543	3.2885	4.9603	2.7444	0.1648	5.709	1.6374	3.0163	0.1903	1.8918	6.4104	5.3782	3.6066	2.0776	3.9608	6.6047	6.0097	4.0436	3.6612	5.8912	5.1974	5.2702	2.8219	5.2943	5.4938	4.0348	-5.0116	10.1214	9.6716	5.0009	6.0438	5.5314
GBM	Tumor	TCGA-14-1034-01	7.35801	4.3889	3.8551	3.3293	3.5947	5.3223	6.1065	4.3104	5.314	3.4183	4.7512	3.9974	4.8304	2.6556	4.0952	4.696	1.8957	0.8246	5.988	1.0079	2.5137	-1.2828	1.7053	6.9405	4.3342	4.2196	1.6695	4.1466	7.301	4.447	4.3392	3.0842	6.4817	5.9727	5.314	2.0569	5.3223	6.1065	4.3104	-4.6082	9.4826	9.107	4.3618	5.2138	6.0279
GBM	Tumor	TCGA-06-0184-01	6.45878	4.2631	3.865	3.0163	3.2205	4.9313	5.1938	4.1343	4.3758	3.2143	4.0722	4.7997	4.5657	2.2723	3.623	3.7699	1.614	0.24	4.9069	0.7916	3.0757	-1.3921	1.1706	5.7364	4.5205	2.8974	0.9716	3.4907	6.3356	4.8905	3.7518	2.1925	5.63	5.0479	4.3758	2.0878	4.9313	5.1938	4.1343	-9.9658	8.6026	8.8585	3.5374	4.7587	5.1977
GBM	Tumor	TCGA-12-3652-01	5.93004	4.4317	3.9874	3.1987	3.3163	4.6101	4.6742	4.2457	3.7709	3.1604	3.7116	3.2856	2.296	1.9452	3.3897	4.1335	1.5165	1.5366	4.3242	1.2085	2.2144	-0.7588	1.0151	6.8596	4.523	2.233	0.9568	2.5238	6.6135	3.9819	2.609	1.125	5.4463	4.855	3.7709	1.8564	4.6101	4.6742	4.2457	-9.9658	8.3222	9.5718	3.8147	4.8279	5.014
GBM	Tumor	TCGA-76-4927-01	7.20808	4.2758	4.4977	3.2856	3.906	5.373	5.5072	4.2825	4.9482	3.3897	5.0148	4.5349	4.9199	1.884	3.7039	5.0295	1.3397	1.884	5.842	1.4808	3.2405	-0.6416	1.6327	6.8407	4.9055	3.417	1.3623	4.3786	6.5919	5.1111	4.182	3.7324	5.6982	5.6473	4.9482	2.1411	5.373	5.5072	4.2825	-2.1779	9.6423	9.2632	4.0593	4.6685	5.6696
GBM	Tumor	TCGA-14-0790-01	7.12913	4.6201	4.3477	3.5645	3.9682	5.0601	5.433	4.6793	5.2118	3.2632	4.1986	5.2713	4.6329	3.0515	3.5073	4.9199	2.3953	2.3423	5.7767	1.105	2.8799	0.5859	2.167	6.4619	5.5528	3.074	1.0007	3.4765	6.2398	4.9681	4.0109	3.7741	5.5348	5.7816	5.2118	2.6348	5.0601	5.433	4.6793	-2.6349	9.5465	9.3998	4.4203	5.7832	5.9084
GBM	Tumor	TCGA-26-5132-01	7.17918	4.2766	3.2915	3.3717	4.0471	5.4002	5.4443	4.2488	5.2563	3.4543	5.0299	4.0867	5.1359	2.3953	4.1302	5.3961	1.3397	2.0844	6.8551	1.7489	2.376	0.058	1.5902	7.5212	5.1355	3.492	2.1541	4.1343	7.4187	5.4996	4.7236	2.8219	6.4041	5.9009	5.2563	2.5924	5.4002	5.4443	4.2488	-6.5064	9.7233	9.3005	4.7242	5.5555	6.1461
GBM	Tumor	TCGA-76-4932-01	6.86234	4.5699	4.47	3.208	3.9801	5.3158	4.7307	4.3263	5.1631	3.3633	4.449	4.7528	4.7148	1.9822	4.0884	4.443	1.683	0.1776	5.44	0.605	4.0019	-0.1504	1.7141	6.963	5.225	2.8701	1.7532	4.2017	6.9947	5.0631	3.864	3.5779	6.0586	5.6619	5.1631	2.1345	5.3158	4.7307	4.3263	-5.0116	9.6622	9.7013	3.9543	5.2184	5.8493
GBM	Tumor	TCGA-32-1970-01	7.28974	4.1136	4.4509	3.4958	4.1261	5.3395	5.5286	4.3772	5.429	3.0774	4.9041	5.026	4.7049	2.1541	4.096	5.4323	3.0056	2.1345	6.2865	1.2576	3.8531	-0.1187	2.0569	6.7736	5.4091	3.6184	1.7912	4.096	6.5498	5.0769	4.5442	3.1311	5.7334	5.8975	5.429	2.6895	5.3395	5.5286	4.3772	-6.5064	9.9338	8.93	4.6422	5.3569	5.8632
GBM	Tumor	TCGA-06-0219-01	4.94438	4.7945	3.4971	2.7487	1.4962	3.9617	4.7555	3.7105	3.2856	2.5462	4.7388	2.8562	3.1987	2.362	3.1556	3.1717	0.9038	0.4552	3.9175	1.0363	1.4228	-1.8314	0.2029	6.1815	3.8491	1.1382	0.058	1.8078	7.6133	4.1219	2.3366	0.9419	4.1852	3.8157	3.2856	1.5115	3.9617	4.7555	3.7105	-6.5064	6.8813	8.8928	2.9432	4.6645	4.0488
GBM	Tumor	TCGA-14-0787-01	6.91698	4.4758	4.9846	3.6417	4.1676	5.6674	5.3726	4.0884	4.891	3.5584	5.1359	4.9805	5.1211	1.8643	3.1797	4.4463	2.2513	1.2271	5.8929	1.0573	3.421	0.346	1.2636	6.758	5.4906	3.3856	0.8726	4.3604	6.8074	5.288	3.8044	2.5363	6.0766	5.5868	4.891	2.5972	5.6674	5.3726	4.0884	-4.6082	9.6654	8.7871	4.1482	5.6499	5.8061
GBM	Tumor	TCGA-12-0618-01	6.78572	4.6277	4.3862	3.8279	3.6347	5.403	5.5451	4.6177	5.7803	3.6635	5.0135	5.0135	4.8871	2.824	3.8085	5.2544	2.8994	2.2452	5.8543	0.6517	3.6961	1.8323	2.4332	6.6632	5.8278	3.5022	1.6604	4.0454	6.779	5.0926	4.5934	4.0627	6.3058	5.4647	5.7803	2.8681	5.403	5.5451	4.6177	-5.5735	9.6629	9.4638	4.852	5.4976	5.3678
GBM	Tumor	TCGA-27-2524-01	6.5284	4.6543	3.906	3.1311	3.4778	4.1692	5.31	3.2112	3.9552	2.9655	4.5217	4.366	4.2196	1.9264	2.876	4.9819	0.5763	0.2522	5.1587	0.2762	2.6441	-0.1993	0.4552	6.949	4.5324	2.2842	0.6699	3.2856	6.6655	4.1294	2.8582	1.6964	5.6297	3.8621	3.9552	1.2696	4.1692	5.31	3.2112	-6.5064	8.4876	9.0519	3.0995	5.0828	5.3758
GBM	Tumor	TCGA-08-0386-01	7.47463	4.8355	4.4277	4.0313	4.1708	5.6519	5.8992	4.7592	5.3796	3.7324	5.5255	4.215	4.8515	2.3953	4.0696	4.3674	2.5462	0.8082	6.0544	1.8604	3.5374	0.4865	1.4547	6.9813	5.605	3.6359	2.0535	4.3723	6.9415	4.8635	4.9695	4.248	6.0106	6.1653	5.3796	2.6302	5.6519	5.8992	4.7592	-2.8262	9.5784	9.269	5.0713	5.8617	5.9784
GBM	Tumor	TCGA-06-0190-01	7.18275	4.2951	4.0619	3.3759	3.3814	5.3434	5.6758	4.5436	4.9141	3.5149	4.359	4.4615	5.0423	2.4198	3.6417	4.7819	2.5634	1.8201	5.8342	1.177	3.4881	0.1388	1.7828	6.8081	5.3042	3.3478	1.7702	4.0488	7.0758	4.8395	3.9506	2.6019	5.5595	5.489	4.9141	2.6783	5.3434	5.6758	4.5436	-1.3921	9.1782	8.935	3.945	4.7719	5.8568
GBM	Tumor	TCGA-06-0745-01	6.45136	3.3336	3.8095	3.1028	2.8422	5.1879	4.935	3.6905	4.1579	3.0602	4.5614	3.9992	4.0799	1.4704	3.1475	4.9723	1.4335	1.692	5.2072	1.0293	2.2603	0.0014	0.7999	7.0338	4.1891	2.3843	0.6699	2.8897	6.6605	4.7893	3.2915	2.4465	5.6744	5.3851	4.1579	1.6093	5.1879	4.935	3.6905	-9.9658	9.0144	8.524	3.5174	4.836	5.1799
GBM	Tumor	TCGA-26-5135-01	6.8441	3.8157	3.9232	3.0358	4.0055	4.97	5.0343	3.8451	4.7377	2.9857	4.6428	5.0968	4.8202	1.9564	3.6928	4.6809	2.1606	0.8488	6.3133	1.0151	3.4945	0.3573	1.4756	7.0635	5.0045	3.1377	1.5064	4.1194	6.1175	5.0255	3.7762	3.5111	5.7887	5.2165	4.7377	2.2603	4.97	5.0343	3.8451	-6.5064	9.0804	8.6586	3.867	4.8545	5.3406
GBM	Tumor	TCGA-41-3915-01	6.29626	4.1954	3.4398	2.5828	2.9581	4.8793	4.7981	3.868	4.523	3.0481	4.222	3.7888	4.085	2.2842	3.1749	3.793	2.1147	1.642	4.9723	1.3397	2.7029	-0.6643	1.5415	6.3012	3.9318	3.2374	1.3283	3.8033	6.6118	4.2691	3.6382	2.3048	5.6988	5.1111	4.523	2.118	4.8793	4.7981	3.868	-5.0116	8.4186	8.4098	4.0952	4.3951	5.0989
GBM	Tumor	TCGA-27-1831-01	5.34481	5.0418	4.8125	2.6895	1.9264	4.2235	4.9782	4.5336	3.5608	3.4752	4.9654	2.667	3.186	1.9601	3.3307	3.7432	0.346	1.5514	4.1269	1.9931	1.9712	-1.3921	1.0503	5.5964	4.6376	0.7493	0.4016	1.4962	6.6515	4.6433	2.5188	2.3451	3.9883	3.3119	3.5608	1.787	4.2235	4.9782	4.5336	-9.9658	7.6092	9.1541	4.14	6.0949	3.9251
GBM	Tumor	TCGA-28-1753-01	7.25964	4.1883	3.7149	3.6382	3.4856	5.0947	5.5414	4.3068	5.1579	3.0411	4.8445	4.8963	5.2854	2.0638	3.3883	4.5411	1.9415	0.058	6.2165	0.7748	3.8521	1.0433	2.2113	6.6595	5.2373	3.2722	1.4859	4.6668	5.8238	4.9937	4.2173	3.8105	5.698	5.8354	5.1579	3.0358	5.0947	5.5414	4.3068	-3.1714	9.8458	9.059	4.3009	4.6905	5.7911
GBM	Tumor	TCGA-12-5295-01	6.11376	5.4108	3.402	2.6828	2.3308	4.6171	5.1014	3.9478	3.6804	2.5036	4.9737	3.7475	3.5473	2.1013	3.4424	3.6393	0.9493	-0.2328	4.4496	1.0779	2.5011	-2.2447	0.1519	6.597	3.4945	2.4908	0.2881	1.8643	6.5258	4.6271	3.6266	1.7097	4.9393	4.4667	3.6804	1.1184	4.6171	5.1014	3.9478	-9.9658	8.3951	8.9672	2.9469	4.5367	5.2032
GBM	Tumor	TCGA-28-5204-01	6.79702	5.251	4.2833	3.7486	4.1343	5.1268	5.7323	4.7887	5.3765	3.6838	5.2285	4.9084	5.0479	2.4597	4.4906	5.4094	2.108	-0.6193	5.5056	1.4859	4.1086	0.547	2.2482	7.1849	5.2743	3.8896	1.6785	4.6071	5.9491	5.2005	4.8187	4.0242	5.5916	5.1273	5.3765	2.7868	5.1268	5.7323	4.7887	-2.8262	9.9037	9.4006	4.4726	5.432	5.9456
GBM	Tumor	TCGA-06-2569-01	7.0782	4.5934	3.9242	3.9636	3.6101	5.2238	5.6639	5.2958	4.841	3.7421	5.1094	5.7656	5.1977	1.9073	4.1523	3.8064	2.727	0.1388	6.2587	1.2576	6.205	0.7916	2.128	6.5113	5.1859	2.4571	1.7912	3.7127	6.7395	5.5958	3.551	3.8925	5.5808	4.5547	4.841	2.3649	5.2238	5.6639	5.2958	2.2019	8.557	9.1363	4.5832	6.2715	5.5327
GBM	Tumor	TCGA-27-1830-01	6.74777	4.1684	4.0348	3.5935	3.1892	5.3597	5.5201	4.5192	5.2653	3.2112	4.4297	4.9937	5.3858	2.7161	3.5851	4.9141	2.909	1.0573	5.2913	1.3735	3.3017	0.9862	1.934	6.2321	5.1796	3.4997	1.5165	4.3104	7.6406	5.3889	4.2165	3.1426	5.8488	5.2559	5.2653	3.186	5.3597	5.5201	4.5192	-2.114	9.5504	9.0187	4.5161	5.789	5.7809
GBM	Tumor	TCGA-06-2559-01	6.94137	4.6634	4.1027	3.8157	3.3321	5.2987	5.5589	4.9074	5.6537	3.5424	4.5772	5.1194	5.2969	2.9167	4.0705	4.2165	3.9487	0.517	5.9103	2.5388	3.7475	1.2271	2.7742	6.8596	5.6837	5.288	2.2019	3.9792	7.2878	5.1069	4.533	3.3966	5.9409	5.8875	5.6537	3.3787	5.2987	5.5589	4.9074	-1.9942	9.803	9.609	5.09	5.6682	5.6574
GBM	Tumor	TCGA-06-0139-01	5.42084	4.0901	3.7324	2.2299	2.3106	4.4142	4.7291	4.162	3.5149	3.1924	4.6335	3.5994	3.9223	2.6067	3.2692	3.8973	1.2023	-0.4325	4.4549	1.3791	2.3704	-1.2142	1.105	5.5423	4.2142	2.2931	0.4125	2.7314	7.5586	4.6118	2.7487	1.6327	4.6854	3.945	3.5149	1.8444	4.4142	4.7291	4.162	-2.6349	7.4669	8.4839	3.0995	4.8425	4.3399
GBM	Tumor	TCGA-27-2526-01	5.58612	4.2533	4.1676	3.0688	3.1556	5.2304	4.7704	4.215	3.8136	2.6984	4.7682	3.4622	3.2677	1.4335	3.3206	4.9644	1.3051	-0.9971	3.7909	2.1638	1.8879	-2.114	-0.013	6.2585	4.4542	2.299	-0.0725	2.3423	6.1691	4.5681	3.2002	2.2144	5.1002	4.7138	3.8136	0.3907	5.2304	4.7704	4.215	-9.9658	8.31	8.9776	3.3393	5.5088	5.1756
GBM	Tumor	TCGA-06-5856-01	6.79623	5.0273	4.4457	4.0207	3.2297	5.2331	6.0175	4.5958	5.3005	3.0002	4.4095	5.3096	5.405	2.609	4.0001	4.3364	3.3192	1.3846	5.5778	1.4228	2.8641	0.0718	1.7744	6.7645	5.3615	3.7237	1.8444	4.1053	6.8128	5.2732	3.9901	3.1195	6.0293	6.1799	5.3005	3.2343	5.2331	6.0175	4.5958	-6.5064	9.6177	9.1744	4.3184	4.9805	5.4803
GBM	Tumor	TCGA-06-5418-01	6.31689	4.7181	3.8116	3.1195	3.5149	5.2548	4.3378	4.6023	4.7861	3.616	5.0104	4.4713	4.582	2.409	3.6748	5.2777	1.2394	1.3454	4.6071	1.6327	3.1458	-1.0262	1.7489	6.5534	5.3965	3.7888	1.6649	3.5149	7.8739	4.5982	4.562	3.3717	5.9966	4.2541	4.7861	2.2421	5.2548	4.3378	4.6023	-3.3076	9.0098	9.3377	3.8935	4.8635	5.2653
GBM	Tumor	TCGA-06-5414-01	7.21454	4.5466	4.0748	3.741	4.0225	6.4979	5.36	4.6341	5.1587	3.3235	4.8555	4.641	4.8213	2.5011	3.981	4.2825	1.7097	1.8996	5.3951	0.8164	3.3163	-0.3566	2.1509	6.6078	4.9374	3.38	1.4335	3.6771	7.6711	4.528	4.2111	3.4583	5.3162	5.8289	5.1587	2.7594	6.4979	5.36	4.6341	-6.5064	9.4457	9.1854	4.1244	4.9741	5.5031
GBM	Tumor	TCGA-06-5417-01	5.72059	5.0202	4.208	3.8491	1.8683	5.0773	5.4676	4.9079	5.55	3.0287	3.7421	3.9892	4.5874	3.0533	4.0153	1.9149	3.0038	-1.2828	4.6029	2.0218	1.9822	-1.0262	2.5828	6.2483	4.8595	4.5028	1.7403	3.5086	6.8807	4.9672	4.2586	2.9929	5.1688	5.7608	5.55	3.011	5.0773	5.4676	4.9079	-9.9658	9.4123	9.3932	4.591	5.5355	4.9691
GBM	Tumor	TCGA-26-5134-01	4.52978	1.5514	1.8404	1.0711	0.346	2.4465	3.2481	1.6695	2.5852	-0.3022	1.7097	2.5996	2.4035	0.0014	0.9038	1.8282	0.1124	-0.8339	4.215	-1.5951	0.8408	-2.0529	0.2277	4.1441	2.0183	0.5763	0.099	1.8444	3.5449	3.0002	1.105	1.2992	3.0393	3.3221	2.5852	0.6699	2.4465	3.2481	1.6695	-6.5064	7.2194	6.2229	2.183	2.1247	3.4765
GBM	Tumor	TCGA-76-4925-01	7.16865	3.7215	4.1128	4.66	4.1563	5.802	5.7514	4.504	5.3789	3.7127	5.3484	5.3165	5.3646	2.3135	3.8239	4.5192	2.2633	2.1862	5.8856	1.8683	3.838	1.7403	2.1894	7.2091	5.7629	3.7656	1.9149	4.7258	6.4923	5.3789	4.435	4.0926	5.9784	5.6764	5.3789	2.6208	5.802	5.7514	4.504	-9.9658	9.9841	9.6043	4.4777	5.8819	6.0851
GBM	Tumor	TCGA-28-2510-01	5.87084	4.2586	3.928	3.5262	3.6324	4.9449	5.1086	4.0935	5.0687	2.7951	4.7437	4.4364	4.9444	2.1345	3.4713	4.3555	3.0515	-1.9942	5.09	1.5013	3.0358	-0.3752	1.5216	6.013	4.7501	2.7205	0.8488	3.9318	6.1314	4.6323	3.5621	3.7836	5.5979	6.1765	5.0687	2.8381	4.9449	5.1086	4.0935	-3.6259	9.1656	8.5197	4.4162	5.254	4.5766
GBM	Tumor	TCGA-06-5413-01	6.42042	5.2126	4.8724	4.1804	3.5174	4.9246	5.8387	4.554	4.9869	3.6324	5.0875	4.5862	4.7872	2.6602	3.9847	4.7121	2.685	1.6558	5.2687	0.9716	3.3163	0.0854	1.9452	7.005	5.3772	4.0037	1.4808	3.9847	6.3169	4.4713	4.3653	3.483	5.2476	5.9213	4.9869	2.6138	4.9246	5.8387	4.554	-2.9324	9.8065	9.553	3.9589	5.1619	5.5644
GBM	Tumor	TCGA-06-0646-01	7.05002	4.2914	4.1579	3.7083	3.0038	5.4877	5.4479	4.4108	5.1161	2.578	4.9892	5.2649	5.0756	2.5238	3.8451	4.8136	2.8034	1.3679	5.7279	1.5415	3.1844	-0.1031	2.0742	6.7505	4.7714	3.6578	1.4228	4.1466	7.3706	4.6277	4.6195	3.7678	5.6499	6.0637	5.1161	3.0446	5.4877	5.4479	4.4108	-5.5735	9.5165	8.5924	4.5868	5.1367	5.5037
GBM	Tumor	TCGA-12-3650-01	6.92184	4.3039	4.3889	3.1797	3.7345	4.711	5.2138	4.2593	4.2541	3.573	4.4108	3.8857	3.6289	1.3225	3.4424	4.6949	1.4756	-0.013	5.632	1.2023	3.1491	0.1388	1.7097	7.3983	5.1772	2.0912	0.8408	3.9012	6.8162	4.1376	3.9327	2.5707	5.2169	5.4111	4.2541	2.0289	4.711	5.2138	4.2593	-9.9658	9.2547	9.5712	3.9185	4.2788	5.4845
GBM	Tumor	TCGA-12-0616-01	6.32825	4.6387	4.1327	2.9765	2.8301	4.7851	5.291	4.0497	4.576	2.8341	4.3206	4.3428	4.1563	1.8484	3.5387	4.287	2.1444	0.8883	5.4121	0.2029	3.2435	0.1519	1.816	6.9501	4.837	2.6693	0.8327	3.5473	6.4055	5.0108	3.6849	2.9052	5.1807	5.5364	4.576	1.9675	4.7851	5.291	4.0497	-2.8262	9.0515	9.3689	3.5645	4.9393	5.3509
GBM	Tumor	TCGA-28-5215-01	7.3279	4.5417	4.1563	4.197	3.3119	5.4233	5.7372	5.2107	5.436	2.727	4.9814	4.7198	4.9137	2.7636	3.6612	4.6159	2.7029	1.105	5.7695	1.3623	3.309	0.7407	2.2513	6.873	4.4536	4.178	1.7575	4.7981	6.4585	5.4631	4.2196	3.7475	5.3274	6.6228	5.436	3.091	5.4233	5.7372	5.2107	-3.6259	9.8211	9.1358	4.8223	4.9213	5.9191
GBM	Tumor	TCGA-19-2620-01	6.32479	3.7367	3.47	2.8641	3.616	5.673	4.8768	3.9089	5.073	3.0654	4.6206	4.2639	4.5577	2.1925	2.9319	4.4726	2.3019	0.8408	5.1206	0.7233	2.3677	-1.8836	1.5013	5.8817	5.0743	3.1892	0.8082	3.5374	6.196	4.4203	3.2572	3.5682	5.4047	6.1256	5.073	2.7007	5.673	4.8768	3.9089	-6.5064	8.8147	8.7858	4.3681	4.4919	4.9584
GBM	Tumor	TCGA-16-0846-01	6.51574	4.2758	4.4223	3.6451	3.6759	5.5373	5.366	3.5621	5.1651	3.3364	5.1506	4.6439	5.1587	2.081	2.9562	5.0756	2.9262	0.8568	5.7877	-0.0574	2.7227	-0.1031	1.4547	6.5046	4.5497	2.7444	1.4281	3.5645	6.6604	5.3274	3.0893	3.2856	5.2713	5.6282	5.1651	2.3077	5.5373	5.366	3.5621	-9.9658	9.1362	8.6398	4.3855	5.3917	5.5345
GBM	Tumor	TCGA-02-0047-01	6.75184	4.0046	3.9515	3.0323	2.9893	5.3096	5.195	4.3807	5.1559	3.1028	3.8621	4.0144	4.7819	2.8701	3.6219	4.215	2.3337	0.605	4.9012	2.05	3.6725	0.2881	2.409	6.6899	4.6725	3.6006	1.0983	3.83	6.9716	4.235	3.8136	3.9534	5.7586	6.1918	5.1559	2.8681	5.3096	5.195	4.3807	-9.9658	9.0042	8.6327	4.7555	5.2518	5.3792
GBM	Tumor	TCGA-19-2624-01	7.0385	4.1772	4.4829	3.8239	3.7699	5.1453	5.5877	4.1327	5.3129	3.4958	4.6742	5.8664	5.3737	2.0569	3.2267	5.3537	3.4143	2.1013	7.1265	1.5661	3.8116	1.8242	2.3564	6.7192	6.3466	3.0825	1.5013	4.2556	6.2476	5.613	3.7215	4.0558	5.8082	5.5457	5.3129	3.6782	5.1453	5.5877	4.1327	-6.5064	10.2889	9.168	4.7924	5.337	5.3456
GBM	Tumor	TCGA-32-1982-01	6.61587	4.0985	3.6312	3.0234	3.5498	4.4536	4.9016	4.1036	4.3031	3.4291	4.6571	4.2699	4.3889	2.3337	3.2988	4.1466	2.6918	1.5165	5.3104	0.9789	2.7572	-0.9132	1.3511	6.1585	5.2281	3.0876	0.8647	3.0808	6.9003	4.3992	3.4251	2.4171	4.9883	5.1823	4.3031	2.5683	4.4536	4.9016	4.1036	-6.5064	8.5457	8.7508	3.5766	4.613	4.8798
GBM	Tumor	TCGA-27-1835-01	6.55264	4.3834	3.8739	4.17	4.6341	5.1974	5.332	3.9468	4.9846	2.5536	4.8585	5.6224	5.0449	1.6093	3.002	4.287	2.9692	1.6374	5.7981	0.6332	3.3421	0.3346	1.6785	6.3227	5.4631	3.0411	1.0293	3.7699	5.6139	5.5342	3.869	3.5657	4.6497	5.2661	4.9846	3.2796	5.1974	5.332	3.9468	-9.9658	9.7211	8.599	3.9384	5.5626	5.6876
GBM	Tumor	TCGA-06-0747-01	7.42282	4.2173	3.3047	3.7518	4.6422	6.125	5.2969	4.2995	5.3893	3.6994	5.0339	5.2103	5.0166	2.1047	3.2112	5.2219	2.9488	1.3735	6.3525	0.7407	3.0163	1.0503	1.8524	7.3192	5.988	3.1377	1.0642	3.9901	6.4984	4.8156	3.8289	3.5523	5.3089	5.9649	5.3893	3.1797	6.125	5.2969	4.2995	-9.9658	9.6233	9.025	4.0497	4.7986	5.4486
GBM	Tumor	TCGA-28-5220-01	6.33793	3.9709	4.784	3.7971	3.0038	4.9928	5.3785	4.1269	4.7274	2.5238	5.1946	4.178	5.09	2.3704	3.5706	4.9165	2.3193	-0.3201	4.4156	1.4859	2.3394	-0.9686	1.2516	6.7642	4.1078	3.755	1.0079	2.685	6.2394	4.6095	3.3379	3.2707	5.3611	5.9991	4.7274	2.5137	4.9928	5.3785	4.1269	-5.0116	9.185	9.1927	4.2884	5.436	5.4568
GBM	Tumor	TCGA-14-0817-01	6.11564	4.6966	4.1764	3.1797	2.8877	4.225	5.1006	3.9608	3.7762	3.1475	4.2064	3.5086	3.3119	1.9564	3.8983	4.0225	1.3679	0.6239	4.3148	0.8647	2.8158	-0.4521	0.7748	6.8143	4.5066	2.1444	0.4761	2.791	6.8144	4.3313	2.8955	1.2023	4.916	4.6999	3.7762	1.5998	4.225	5.1006	3.9608	-9.9658	7.892	9.0533	3.4007	4.9631	5.0237
GBM	Tumor	TCGA-06-2570-01	6.9628	4.4397	3.8866	3.4674	3.4945	5.0854	5.5744	4.3278	5.5522	3.2632	3.8905	4.528	4.9208	2.6487	3.831	3.2143	3.8925	-0.6873	5.5438	1.8918	3.47	0.5568	2.5462	6.7354	6.002	3.5035	1.683	4.359	6.4126	4.853	3.7815	3.5009	5.4463	5.6485	5.5522	2.9109	5.0854	5.5744	4.3278	-6.5064	9.3074	9.0532	4.7544	4.975	5.5641
GBM	Tumor	TCGA-41-4097-01	6.38574	4.1153	3.8075	2.7615	3.2632	4.835	5.1543	4.5868	4.859	2.9394	4.0225	4.8866	4.9589	2.5313	3.3293	4.1178	1.949	0.8647	5.2196	1.0151	3.4765	-0.3383	1.7912	6.2698	4.6525	3.345	1.177	3.8002	5.8112	4.8978	3.603	2.9893	6.1104	5.9503	4.859	3.2707	4.835	5.1543	4.5868	-6.5064	8.6621	8.3721	4.5386	5.1144	5.2612
GBM	Tumor	TCGA-06-0211-01	7.40747	4.69913	4.09518	3.73618	3.90652	5.55785	5.58781	4.90501	5.03962	3.60422	4.73039	4.81177	4.92699	2.51503	4.0752	4.66963	2.20193	1.71852	5.79263	1.84637	3.53869	0.745039	2.10132	6.9821	5.47497	3.4648	1.23329	4.36951	7.37816	4.8615	4.51666	3.59287	5.41362	6.06427	5.03962	2.95719	5.55785	5.58781	4.90501	-6.50638	9.55025	9.30756	4.85403	4.98416	6.10299
GBM	Tumor	TCGA-02-2483-01	6.85897	4.9514	4.4027	4.3765	3.6347	4.845	5.8689	4.6787	5.1002	3.29	5.2597	4.6713	4.637	2.1378	3.091	1.7273	2.6693	-3.0469	6.0957	1.2085	2.6208	0.8961	1.4441	7.2222	4.4364	3.3689	1.5709	4.7635	6.5594	5.839	3.6417	3.1987	5.6741	5.3865	5.1002	1.9601	4.845	5.8689	4.6787	-9.9658	9.5414	9.3646	4.4509	5.6789	5.6011
GBM	Tumor	TCGA-76-4931-01	7.0518	4.5186	4.3068	3.867	4.3126	5.6142	5.7469	4.5117	5.3961	3.3979	4.9137	5.5448	5.8043	2.6556	3.8511	5.1396	2.7742	0.4552	6.2911	1.2085	4.3463	1.0847	2.4934	7.2997	6.089	3.8095	1.7786	4.7005	5.8503	4.9933	4.5293	4.1061	6.0262	6.0512	5.3961	3.3563	5.6142	5.7469	4.5117	-9.9658	9.9155	9.3823	4.3958	5.3527	5.8687
GBM	Tumor	TCGA-06-0156-01	6.5207	4.76289	4.33885	3.48169	2.5548	5.16935	5.44713	4.70241	4.83138	2.71169	5.15201	4.53361	4.73313	2.78991	4.1061	4.40982	2.02535	1.39835	5.34215	1.98041	3.39656	0.476123	2.33086	6.6528	4.75332	3.49521	1.72505	4.37195	8.45178	4.65082	4.59786	2.5338	5.62954	5.41334	4.83138	3.20336	5.16935	5.44713	4.70241	-5.9658	8.97716	8.78929	4.43001	5.06567	5.44582
GBM	Tumor	TCGA-27-2523-01	7.52176	4.6871	4.8151	4.2862	4.0392	5.6679	5.7318	4.4983	5.2578	3.4517	5.0108	4.5336	4.6347	2.7487	3.6872	5.064	2.2019	1.0915	6.0422	2.0465	3.6242	0.5568	2.0912	7.1743	5.4696	4.0046	1.3511	4.4868	6.5404	4.9987	4.5318	3.6301	5.6775	5.9787	5.2578	2.6805	5.6679	5.7318	4.4983	-9.9658	9.8554	9.487	4.2958	5.2173	5.6522
GBM	Tumor	TCGA-27-1837-01	6.7561	3.9983	3.3773	3.1604	3.944	5.3223	5.3245	4.0436	4.8167	3.055	4.441	4.9575	4.9189	2.2299	3.5073	4.9658	2.0218	-1.0862	5.7209	1.0363	3.2752	0.2277	2.0254	6.4904	5.0721	3.1556	1.0642	4.1441	6.1316	4.7399	3.9947	3.3478	5.4536	6.005	4.8167	2.3423	5.3223	5.3245	4.0436	-6.5064	8.9775	8.8107	4.3356	4.9942	5.3995
GBM	Tumor	TCGA-06-0744-01	6.75184	4.0331	3.6804	2.6873	3.6042	4.7296	4.9677	3.7518	4.5565	3.0671	4.9621	4.863	4.3951	2.0673	3.3061	4.2833	2.2019	0.434	6.2728	0.9268	2.8422	0.1519	1.3901	7.087	5.8332	2.6043	0.434	3.7171	6.434	4.6793	3.3591	2.7805	4.6994	4.6159	4.5565	2.4439	4.7296	4.9677	3.7518	-4.6082	9.1843	9.036	3.6136	5.1086	5.2468
GBM	Tumor	TCGA-06-0750-01	6.12352	4.0807	4.2616	2.8117	2.9637	4.9819	5.0135	3.5863	4.0807	2.4198	4.8595	4.5663	4.9663	1.9749	3.1604	4.613	1.8484	0.4761	5.0635	0.4447	2.6371	-1.1488	0.7146	6.1439	4.576	2.5487	0.517	3.5486	6.3752	5.178	2.9674	2.6043	5.6946	5.2142	4.0807	2.1638	4.9819	5.0135	3.5863	-6.5064	8.8654	8.1363	3.2973	5.1684	4.9279
GBM	Tumor	TCGA-32-5222-01	6.2852	4.6702	4.4183	3.9938	2.8034	4.6006	5.3284	4.1946	4.7132	3.4804	5.1974	4.3814	3.9002	2.2391	3.8571	3.6148	1.6604	0.9789	4.2072	2.1013	2.4439	-0.9686	1.5612	6.5298	4.6451	3.4543	0.9343	2.791	6.9806	4.018	3.5815	2.8502	5.026	5.3667	4.7132	2.1378	4.6006	5.3284	4.1946	-6.5064	9.2604	9.5775	3.4197	4.5491	5.1273
GBM	Tumor	TCGA-27-2519-01	6.39236	4.3278	4.3249	4.149	3.3883	5.4098	5.3858	4.1875	4.7608	2.299	4.7814	4.3758	4.7549	2.2633	3.3619	4.8575	1.6327	0.6145	5.3449	0.6608	2.6715	-0.6643	1.4962	6.6063	3.836	3.0038	1.105	3.9261	7.6963	5.1102	3.7083	2.5288	5.9423	5.7921	4.7608	2.4306	5.4098	5.3858	4.1875	-9.9658	9.3503	8.8894	4.0136	5.3678	5.5744
GBM	Tumor	TCGA-12-0821-01	7.00486	5.0648	4.6387	4.0748	3.0358	5.6227	6.1367	4.8243	5.2806	2.4727	4.511	4.6921	5.1235	2.8641	3.3897	4.421	1.7532	1.6558	5.2052	1.9712	3.4237	0.1257	1.787	7.1625	4.4013	3.453	1.6093	4.441	8.1186	5.5314	4.1986	3.5449	5.774	5.8746	5.2806	2.4544	5.6227	6.1367	4.8243	-1.1811	9.6876	9.1874	5.2958	5.6879	5.9265
GBM	Tumor	TCGA-19-2619-01	6.98334	4.3779	4.1302	3.1179	3.3379	5.8961	5.1186	4.4128	5.3162	3.3293	4.6843	4.8395	4.8958	2.7572	3.0654	5.5311	1.5902	1.5115	5.3234	1.5266	3.7017	0.2522	2.3366	6.8206	5.3093	3.6148	1.4228	4.306	6.4501	4.6018	3.8105	3.7291	6.1127	6.2559	5.3162	2.971	5.8961	5.1186	4.4128	0.2029	9.5177	9.2213	5.1863	5.3187	5.8238
GBM	Tumor	TCGA-12-0619-01	7.06123	3.8136	3.793	3.6691	3.9765	5.4343	5.8435	4.2111	4.8987	3.4237	4.6142	4.8053	5.0879	2.4171	4.3313	4.6949	1.5316	1.0573	5.774	0.9862	3.5047	0.8647	2.004	7.2086	5.4081	3.5136	2.1734	4.3002	8.0619	4.6508	4.3931	3.7857	5.72	5.4091	4.8987	2.9581	5.4343	5.8435	4.2111	-2.7274	9.4852	8.8396	4.8895	4.843	5.6868
GBM	Tumor	TCGA-28-5213-01	5.33554	4.7143	4.6189	2.9052	2.3423	4.8038	4.8704	4.2389	4.1859	2.5413	5.2161	3.7507	3.928	2.4883	3.832	4.3958	1.6327	0.0854	3.6983	1.5266	2.2299	-2.114	0.517	6.2906	4.222	3.6566	0.1519	2.7868	8.1131	4.1203	3.3336	2.2268	5.0871	5.2335	4.1859	1.9859	4.8038	4.8704	4.2389	-9.9658	8.452	8.9689	3.1717	4.6972	4.656
GBM	Tumor	TCGA-14-0789-01	6.95328	4.1474	3.3979	2.9148	3.2766	5.2653	5.3712	4.637	5.433	3.0038	4.425	4.3031	4.7082	2.3164	3.5387	4.1019	0.8805	1.5266	4.677	0.8327	3.2313	-1.3921	2.1247	5.9096	4.0242	3.5682	1.9264	3.928	8.3193	4.8856	4.048	3.8964	6.4378	5.7851	5.433	2.5112	5.2653	5.3712	4.637	-4.6082	8.837	9.161	3.7773	4.7431	5.4446
GBM	Tumor	TCGA-28-5209-01	7.7089	4.8395	4.447	4.0287	3.9608	5.393	6.1277	4.9103	5.6571	3.3591	4.976	5.168	5.2589	2.6161	4.2884	4.6977	2.1988	-4.035	6.2743	0.8164	4.2987	0.2881	2.5948	7.0451	5.2188	3.7215	2.1313	4.8856	6.3792	5.1264	4.4932	4.6428	6.1173	6.2553	5.6571	2.9186	5.393	6.1277	4.9103	-5.0116	9.8763	9.6514	4.3827	5.3618	6.3393
GBM	Tumor	TCGA-28-5218-01	7.13926	4.1812	3.944	3.7204	3.0585	5.0704	5.7049	5.4967	4.7698	2.8955	4.441	5.0545	5.0383	1.3283	3.1112	4.366	1.8404	-2.114	5.5653	0.3115	3.9374	1.4441	1.736	6.6956	4.1482	2.7073	1.5563	4.7939	5.7661	6.0644	4.3111	3.5875	6.1146	5.0704	4.7698	2.2452	5.0704	5.7049	5.4967	1.642	9.3512	8.7643	4.4751	5.1895	5.9716
GBM	Tumor	TCGA-28-2514-01	7.09329	4.3306	4.2457	3.6207	3.4583	5.213	5.4973	4.47	5.3657	2.9655	4.2457	3.9571	4.6543	2.4985	4.0127	4.5742	3.0323	1.6875	6.0365	1.2085	3.4197	-0.2845	2.1798	6.5443	4.4803	3.2572	1.7273	3.8827	6.9786	4.0705	4.1852	4.01	5.778	6.4819	5.3657	3.345	5.213	5.4973	4.47	-9.9658	9.4722	8.8774	4.6329	5.1412	5.5145
GBM	Tumor	TCGA-06-5859-01	6.50367	4.0713	5.0751	3.9431	2.8034	5.4009	5.7637	4.5577	5.2555	2.6302	4.9589	5.0117	4.9203	2.2603	4.2503	3.7138	2.7551	0.4016	5.1244	1.4911	2.9562	-0.3752	1.7403	6.4631	4.6983	3.6497	1.5998	3.091	6.354	4.8012	4.6742	3.1653	5.8347	5.5308	5.2555	3.287	5.4009	5.7637	4.5577	-9.9658	9.5756	9.0435	4.6201	5.0519	5.6834
GBM	Tumor	TCGA-28-2509-01	6.90637	5.3583	3.5237	3.87	3.245	5.6335	5.5973	4.1011	4.7132	3.2002	4.677	4.3569	4.7976	2.4492	3.7345	4.7388	1.8996	-3.816	5.0549	1.7995	2.7551	-0.8339	1.3397	6.6671	4.3477	3.3047	2.0535	4.1506	6.4634	4.3378	4.2578	3.1685	6.2163	5.5937	4.7132	2.4008	5.6335	5.5973	4.1011	-2.9324	9.04	8.9591	4.2676	4.5311	5.5617
GBM	Tumor	TCGA-14-1825-01	6.60676	5.4887	4.6634	3.9204	3.6972	4.9561	5.5668	4.8105	4.7619	2.982	5.0343	4.4006	4.7913	3.4277	3.7496	4.9289	2.2783	0.4657	5.3851	0.8726	3.287	0.6332	1.8201	7.227	4.8455	3.136	1.6964	5.1115	6.7101	5.5201	4.1708	3.3134	5.4463	6.1023	4.7619	2.8462	4.9561	5.5668	4.8105	-6.5064	9.4679	9.0283	4.2281	5.2196	5.6291
GBM	Tumor	TCGA-19-4065-01	6.10686	4.858	4.573	3.4907	3.034	4.8515	5.4077	4.5072	4.3463	3.2692	5.1498	4.197	4.5922	2.6533	3.8187	4.1716	1.9859	1.7617	4.842	1.6649	2.8819	-0.4719	1.6785	6.3681	5.1607	2.8936	1.5612	3.4739	6.839	5.1186	3.7421	2.6828	5.4582	5.1643	4.3463	2.7227	4.8515	5.4077	4.5072	-4.035	8.772	9.2447	4.2064	5.2836	5.225
GBM	Tumor	TCGA-02-2485-01	7.46747	4.5814	4.3903	3.8954	3.5827	4.9141	5.6265	4.2427	5.2231	3.3177	5.2227	5.1081	4.9298	2.0638	3.2374	4.1579	2.828	1.3051	6.4221	1.0363	3.7898	0.1776	1.934	6.8581	5.8756	3.5621	1.949	3.9974	6.6868	5.1404	4.2958	3.8013	5.6502	5.8238	5.2231	3.2677	4.9141	5.6265	4.2427	-5.0116	10.0349	9.534	4.7788	4.7121	6.231
GBM	Tumor	TCGA-12-1597-01	5.67352	3.6827	3.3407	3.5779	2.7183	5.0348	4.6341	3.8085	4.1261	2.5924	4.0506	3.0706	3.1844	1.7786	2.2693	3.6928	1.0779	-0.5543	4.6	-0.4325	2.376	0.679	0.4657	6.1293	3.9346	1.816	0.6517	3.0181	5.2758	4.0977	3.1011	2.1702	5.1563	4.8744	4.1261	1.2516	5.0348	4.6341	3.8085	-3.458	8.077	8.7136	3.5287	3.9002	4.2243
GBM	Tumor	TCGA-28-1747-01	6.54502	4.174	4.3292	3.5923	3.7857	5.5729	5.2739	4.0985	5.0197	3.2811	5.033	4.7565	5.0816	2.0465	3.6359	4.9787	2.3366	0.4447	5.0964	1.3846	3.3731	0.1519	1.8643	6.4114	5.4764	3.3675	0.9493	4.2072	5.9383	4.9668	4.2017	3.6006	5.6696	5.2331	5.0197	2.8158	5.5729	5.2739	4.0985	-5.0116	9.3543	9.2128	4.6195	5.119	5.6238
GBM	Tumor	TCGA-28-2499-01	6.00334	5.1086	4.5699	3.3435	2.9432	4.9313	5.1198	4.2503	4.8934	2.3953	4.3827	4.2936	4.4156	2.5338	3.6793	5.1724	1.8643	1.8242	4.0532	2.0946	2.4753	-0.9971	1.2516	6.1167	4.3667	3.4237	1.0363	3.483	5.6977	4.6142	4.2181	2.0604	5.7266	5.7206	4.8934	2.8178	4.9313	5.1198	4.2503	-5.5735	8.5573	8.695	4.3999	5.0816	5.327
GBM	Tumor	TCGA-06-0649-01	6.1252	4.096	4.0037	2.8522	2.7444	4.579	5.104	3.9571	4.5934	2.2513	4.4582	4.0462	4.3399	2.7227	3.3897	4.5261	2.1894	0.4657	4.5066	1.8036	2.8381	-0.5125	1.4388	5.8642	4.5429	2.6602	0.2998	3.5436	6.6113	4.4088	3.5073	2.8341	5.1823	6.106	4.5934	2.5707	4.579	5.104	3.9571	-3.1714	8.6328	8.1659	3.4556	4.846	5.1301
GBM	Tumor	TCGA-06-2564-01	6.91222	4.3883	4.6674	3.551	3.5436	5.7279	5.5173	5.0304	5.3827	3.5411	4.7099	5.0036	5.2138	2.4883	3.9194	4.6323	3.0428	1.8643	5.153	2.0776	4.2095	0.7407	2.5437	6.3192	5.8963	4.2906	1.9302	4.251	7.6507	4.8807	4.892	4.0816	5.9894	6.0913	5.3827	3.245	5.7279	5.5173	5.0304	-9.9658	10.0177	9.2402	4.5608	5.7239	5.8009
GBM	Tumor	TCGA-06-5408-01	7.0389	4.9374	4.1579	4.0816	4.1732	5.314	5.9122	4.3155	5.675	3.0671	4.917	5.0104	4.9663	2.9525	3.8993	5.0277	2.05	1.7053	5.6896	1.2147	3.6669	0.03	2.1114	7.1168	4.4621	4.2072	2.1114	4.5249	7.4359	4.84	4.6422	4.0985	6.1922	6.1351	5.675	2.8994	5.314	5.9122	4.3155	-2.3147	9.8677	9.4757	4.4216	5.4595	5.978
GBM	Tumor	TCGA-27-1832-01	6.82309	4.4945	3.9412	3.0825	3.208	5.7296	5.1534	3.981	4.8043	2.8622	4.6358	4.9074	4.951	1.736	2.9655	4.6877	2.59	-0.6873	5.6256	0.7748	2.8321	-0.2498	1.1706	6.5124	4.5742	2.7763	1.1833	3.6972	6.5488	5.6011	3.1377	2.5536	6.0586	4.2009	4.8043	2.6556	5.7296	5.1534	3.981	-3.3076	9.7765	9.0841	4.2358	5.5389	5.8344
GBM	Tumor	TCGA-14-1829-01	4.61533	5.5766	4.4996	2.5137	1.0222	3.8249	4.7383	4.5838	3.2313	2.8622	5.1883	2.004	2.8402	2.876	2.9148	3.4291	1.0503	0.3346	4.0705	1.5064	1.2516	-2.2447	0.8164	5.6153	3.7688	1.7954	-0.2328	1.2576	7.6672	4.4027	2.7183	1.4704	4.0619	4.0233	3.2313	1.5902	3.8249	4.7383	4.5838	-6.5064	6.752	8.7408	2.685	4.9969	3.5596
GBM	Tumor	TCGA-32-2615-01	6.5934	4.1962	3.9883	3.2929	3.4034	5.1772	5.2423	4.2714	5.0099	2.7357	4.5473	4.9668	5.0099	2.2931	3.6804	4.4364	2.676	2.0254	5.3075	0.7999	2.8178	-0.3566	1.8762	6.5995	4.9069	3.5047	1.6374	4.0233	7.021	4.8753	3.8818	3.3952	5.7366	5.7703	5.0099	2.9488	5.1772	5.2423	4.2714	-5.0116	9.1289	8.5766	4.061	4.6793	5.4303
GBM	Tumor	TCGA-06-0158-01	7.12099	4.1261	3.7127	3.5779	4.0705	6.1272	5.2262	4.5299	5.4608	3.3773	4.7693	4.9002	5.1514	2.3337	3.928	5.0457	2.6232	2.2175	6.1997	1.3167	3.5187	0.5763	2.4198	6.5168	5.5094	3.8289	1.4441	4.0037	7.281	4.8069	4.0216	3.1294	5.7458	6.0685	5.4608	3.1393	6.1272	5.2262	4.5299	-9.9658	9.4263	8.869	4.916	5.0409	5.9031
GBM	Tumor	TCGA-06-2558-01	6.39078	4.7882	4.5154	3.8491	3.5362	5.0479	5.5104	4.7903	5.0896	3.6018	4.5072	4.4257	4.8115	2.8838	3.8837	4.859	2.2633	0.9419	5.2754	1.5758	3.1829	0.6699	2.2082	6.7626	5.374	3.7421	1.5612	3.623	6.7616	4.7104	4.4549	2.8974	5.5638	5.9649	5.0896	2.826	5.0479	5.5104	4.7903	-9.9658	9.3554	9.2619	4.5386	5.4999	5.428
GBM	Tumor	TCGA-28-5216-01	6.52266	5.0492	3.9337	3.453	2.6395	4.8375	5.7608	4.018	5.1355	2.8321	4.2781	4.347	4.8279	2.9839	3.9299	3.981	2.1047	0.7058	4.8435	1.0151	2.9224	0.0158	1.6234	6.615	4.0144	3.7582	1.4547	4.3965	6.9085	4.8978	3.4291	3.2526	5.9704	5.6725	5.1355	2.6533	4.8375	5.7608	4.018	-5.0116	9.1245	9.1899	4.2646	5.0023	5.6247
GBM	Tumor	TCGA-28-5207-01	6.67577	4.9589	4.518	3.8147	3.1344	5.191	5.7049	4.439	5.5549	2.96	5.3484	4.5361	4.8846	2.791	3.8269	4.7677	2.5996	1.5013	4.7005	2.0147	2.9224	-0.7108	2.4008	6.7702	4.7404	3.7614	1.4174	4.5423	7.0953	4.8783	4.5522	3.9617	5.878	6.5529	5.5549	3.1523	5.191	5.7049	4.439	-6.5064	9.562	8.9987	4.8329	5.2724	5.6708
GBM	Tumor	TCGA-41-2572-01	6.76234	4.215	4.1449	3.6532	4.0037	5.4047	5.0683	4.3104	4.182	2.7679	4.2795	5.0166	4.4983	1.5902	3.4183	4.4816	1.6093	-0.6193	5.8212	0.8647	3.0376	0.2881	1.3454	6.4665	5.1839	2.1444	0.9191	3.3828	6.0711	4.7929	3.3675	2.93	5.4084	5.2346	4.182	2.1345	5.4047	5.0683	4.3104	-9.9658	8.8584	9.03	3.944	5.2987	5.632
GBM	Tumor	TCGA-06-0130-01	6.55135	4.3278	3.5449	3.8759	2.4571	5.0623	5.7007	4.511	4.8172	2.96	5.1534	5.0299	5.1631	2.3953	3.5887	4.9444	1.5709	-1.5105	5.9303	1.614	3.7773	0.8568	1.9073	6.1669	4.7361	3.3521	1.4911	3.834	6.4162	5.2586	4.2373	2.9488	5.7506	5.3377	4.8172	3.2374	5.0623	5.7007	4.511	-9.9658	9.3045	8.6938	4.3313	4.8238	5.5775
GBM	Tumor	TCGA-06-5416-01	6.50001	4.9322	3.66	4.6035	2.4701	4.7767	5.5537	4.1294	4.7394	3.055	5.5635	4.5886	4.6759	2.4225	3.7982	4.5583	2.3677	1.8484	5.5781	2.826	3.449	0.679	1.2934	6.8243	4.6095	3.1971	2.2603	3.9892	6.2196	5.7049	3.7335	2.59	5.5277	5.1635	4.7394	3.4156	4.7767	5.5537	4.1294	-6.5064	9.218	9.1114	4.0593	4.3256	5.677
GBM	Tumor	TCGA-06-0168-01	6.46046	4.1103	3.8075	2.8482	3.3492	4.6753	4.6531	4.0523	4.4203	3.0199	4.4686	4.4777	4.1027	1.3956	4.1636	4.7388	2.1766	1.692	5.5361	0.9115	2.9747	-0.5756	1.3051	6.8356	4.3249	3.5035	0.7999	3.8905	7.9557	4.6617	3.5187	2.6232	5.407	4.6753	4.4203	1.7185	4.6753	4.6531	4.0523	-4.2934	8.734	8.5678	3.9682	4.652	5.44
GBM	Tumor	TCGA-02-0055-01	6.04854	4.251	3.9468	3.5449	2.6624	4.7099	5.1514	4.8172	4.2714	2.753	4.8881	4.1136	4.5286	2.128	3.6972	3.869	1.7617	-0.1345	4.3772	1.7009	2.3048	-0.9132	1.8282	6.1773	4.3709	3.345	1.3623	3.3897	7.2023	5.1847	3.2737	2.6302	5.298	4.7846	4.2714	2.2206	4.7099	5.1514	4.8172	-0.0425	8.4015	8.6147	3.5349	4.7661	5.1132
GBM	Tumor	TCGA-06-5415-01	6.5935	4.6387	4.7746	3.9682	3.836	6.0237	5.2052	4.597	4.9819	3.644	5.2902	4.7877	4.8525	2.876	3.5559	4.8699	2.5437	0.3573	5.7767	2.299	3.2343	0.1257	2.0289	6.5604	5.4861	3.6148	1.3956	3.9645	6.0633	4.8125	4.2335	3.449	5.575	5.7832	4.9819	3.002	6.0237	5.2052	4.597	-9.9658	9.3349	9.0114	4.3793	5.0951	5.5289
GBM	Tumor	TCGA-06-5411-01	5.40873	4.8515	4.6387	3.6983	2.8542	4.6422	5.172	4.0375	4.573	2.8936	5.1579	4.1449	4.4503	2.7993	3.2602	4.7055	2.5112	-0.5756	4.359	1.2085	2.6533	-0.9971	1.3051	6.3468	4.3931	3.5411	0.5763	3.4726	6.8254	3.8866	3.869	3.1377	5.2153	5.9395	4.573	2.7763	4.6422	5.172	4.0375	-2.4659	8.7908	8.6632	4.0584	4.783	4.3758
GBM	Tumor	TCGA-26-5139-01	7.12963	4.4758	4.1986	3.5299	4.3834	5.8076	5.5817	4.6938	5.2961	3.2692	4.8105	5.0457	5.076	2.3423	3.7006	4.6224	2.4035	2.1114	5.8189	1.125	3.4984	-0.6416	2.0878	6.5382	5.2091	3.6428	1.3397	4.1644	7.822	5.1744	3.981	3.9673	5.877	5.5445	5.2961	2.8158	5.8076	5.5817	4.6938	-9.9658	9.6423	9.4758	4.322	5.109	5.8176
GBM	Tumor	TCGA-76-4928-01	6.60261	4.4027	4.067	3.483	3.2677	5.1069	5.4009	4.2488	4.7399	3.1717	4.6445	4.4608	4.8729	1.9527	3.1669	4.4169	1.3791	-0.5543	4.8758	0.8568	3.2988	-0.6193	0.9789	6.5627	4.9746	2.9637	0.6608	3.8729	6.351	4.9603	3.5249	3.506	5.7007	5.3463	4.7399	2.2872	5.1069	5.4009	4.2488	-4.6082	9.2105	8.9908	3.7171	5.1792	5.5333
GBM	Tumor	TCGA-06-0644-01	6.93106	4.2297	3.6451	3.8208	2.7161	5.085	5.4954	4.4027	4.3709	2.3135	5.0162	4.3765	4.9691	2.2175	3.74	5.0162	1.2333	-0.0425	5.1914	1.2756	3.4726	-0.9406	1.0079	6.7338	4.3449	3.1228	0.6969	4.0497	6.3102	4.95	4.4556	3.2662	6.0468	5.7372	4.3709	2.4171	5.085	5.4954	4.4027	-0.0725	9.1411	8.7889	3.4437	5.0527	5.8169
GBM	Tumor	TCGA-14-0871-01	6.48458	3.8228	3.4648	4.3009	2.9784	5.1835	5.5043	4.1563	5.149	3.2435	2.2813	5.3889	5.022	0.9493	3.1393	5.2514	2.2931	-0.4521	5.5255	0.099	5.8746	2.0912	2.2693	6.5532	5.2899	3.6172	1.7828	4.6247	6.0416	5.658	3.6838	4.1392	5.1056	4.9801	5.149	2.2299	5.1835	5.5043	4.1563	4.7214	9.1557	9.3126	3.9137	6.4393	5.7184
GBM	Tumor	TCGA-32-2632-01	7.11394	3.9947	3.4304	3.6207	3.6939	5.085	5.2631	4.174	4.6502	2.8055	4.1891	4.404	4.6451	2.3926	3.3759	5.3459	2.7805	0.9493	5.8136	1.7489	2.9013	-0.2328	1.196	6.8362	4.9933	3.2343	1.2756	3.9318	6.3352	4.518	3.9299	3.2034	5.5675	5.5623	4.6502	2.2513	5.085	5.2631	4.174	-3.1714	9.2132	8.8747	4.4196	4.5167	5.7412
GBM	Tumor	TCGA-06-0882-01	6.26477	4.3618	4.4628	3.4609	3.5535	5.675	5.2631	4.4344	4.8289	3.0757	4.4732	4.3278	4.9617	2.3508	3.4726	4.6347	2.0004	0.8883	4.673	1.9638	3.3264	-0.7346	1.6649	6.276	4.8635	3.8481	1.0711	3.6905	7.1573	4.686	3.6872	3.4856	5.9371	5.4932	4.8289	2.8819	5.675	5.2631	4.4344	-9.9658	8.9911	8.5828	4.2593	5.0335	5.2854
GBM	Tumor	TCGA-19-2625-01	6.65052	4.0331	3.4894	3.0995	3.9865	5.2296	5.7589	3.6312	4.6312	2.9071	4.7533	4.8515	4.7539	2.1114	3.5899	3.8808	2.2693	1.5115	5.6291	-0.0425	2.3677	-0.7834	0.9493	6.6238	4.2017	2.7314	2.2783	3.1892	6.8525	5.07	2.9911	2.036	6.2441	5.3875	4.6312	2.2144	5.2296	5.7589	3.6312	-4.6082	8.7189	8.4604	3.8993	4.8798	5.439
GBM	Tumor	TCGA-32-1980-01	5.77398	4.215	3.5911	3.1294	2.8974	4.6742	5.1623	3.8147	4.3869	2.828	4.6725	4.1318	4.3527	2.1411	3.4752	4.1676	2.233	-0.1031	4.4033	0.6699	2.6693	-0.7834	0.8961	5.7719	4.208	2.5388	0.7493	3.2796	5.9814	4.0601	3.0876	3.1344	5.5656	5.5653	4.3869	2.1606	4.6742	5.1623	3.8147	-3.1714	8.4261	8.4543	3.7127	4.7882	4.6781
GBM	Tumor	TCGA-27-1834-01	6.42883	4.6171	4.5192	3.7421	2.9243	4.9294	5.306	4.5988	5.2638	2.5238	4.9141	4.5742	4.4938	3.0376	3.7909	4.6674	2.1345	1.8722	4.7882	2.4934	3.5124	0.0014	2.1509	5.9284	4.7581	4.1946	1.4859	4.1252	6.5601	5.2215	4.2847	3.162	5.7996	5.9505	5.2638	2.8014	4.9294	5.306	4.5988	-4.035	9.3478	8.9508	4.7367	5.5475	5.6918
GBM	Tumor	TCGA-41-2571-01	5.5919	3.1924	3.4894	3.1426	3.4116	5.018	4.8465	3.1813	3.5362	2.3926	4.2921	4.3075	4.0567	1.6374	2.4985	4.4881	0.8246	-1.4699	4.8744	-0.4719	2.3871	0.3231	0.5859	6.3593	4.6352	1.5013	0.547	3.7464	5.4532	3.5766	3.2826	1.2934	5.4663	3.8023	3.5362	1.0007	5.018	4.8465	3.1813	-4.2934	7.8344	7.9052	2.8681	3.8915	4.1019
GBM	Tumor	TCGA-14-0781-01	6.21977	4.1285	4.0892	2.496	3.2251	4.8197	4.9472	4.0858	4.439	2.9032	4.479	4.041	4.7312	1.9264	3.2205	4.073	1.4011	0.7579	4.3506	0.8961	2.7007	-0.6873	1.2455	5.9088	4.6697	2.8055	0.9115	3.3814	6.5244	5.067	3.1028	2.4675	5.861	5.5223	4.439	2.3871	4.8197	4.9472	4.0858	-0.1665	8.8528	8.9144	3.4791	5.0794	5.172
GBM	Tumor	TCGA-06-0157-01	7.19557	4.2714	4.1571	3.7752	3.5424	5.7911	5.478	4.4848	5.0484	3.1145	4.7587	4.5988	4.7016	1.5661	3.6771	3.5839	2.4144	1.884	5.779	1.1382	3.4609	0.605	1.7273	6.5333	5.6112	3.3647	1.1577	3.7486	6.3482	4.734	4.0348	3.5473	5.4489	5.9232	5.0484	2.7636	5.7911	5.478	4.4848	-9.9658	9.3805	8.8697	4.3534	5.2157	5.6815
GBM	Tumor	TCGA-12-3653-01	7.30464	4.1011	4.0705	3.6612	4.3779	5.1752	5.5429	4.7127	5.1799	3.8411	4.1668	4.9156	4.5547	1.8444	4.1539	5.3402	2.2901	-0.7834	5.7538	1.642	3.868	0.24	1.9377	6.6892	4.8675	3.5212	1.8722	3.7149	5.7277	4.9869	4.9538	2.8994	5.8929	6.0155	5.1799	2.609	5.1752	5.5429	4.7127	-3.458	9.5276	9.341	4.5928	5.2354	6.121
GBM	Tumor	TCGA-76-4926-01	6.48765	4.3583	4.5398	3.2034	3.5486	5.6733	5.4938	4.7474	5.2388	3.2034	5.0657	4.3639	4.9317	2.1345	3.3134	4.8992	1.9034	1.9638	5.014	1.9073	3.2796	-0.7108	2.0395	6.234	5.1567	3.7226	0.7579	4.2212	7.4868	5.0926	4.1804	3.8289	5.7576	6.1111	5.2388	2.6185	5.6733	5.4938	4.7474	-9.9658	9.4956	9.1153	4.4673	5.2491	5.5856
GBM	Tumor	TCGA-26-5133-01	7.04406	4.7044	4.5311	3.9636	4.3198	5.6241	5.8871	4.4483	5.0781	3.2065	4.2862	5.4043	4.3765	2.2723	3.8601	4.9289	2.3649	-2.1779	5.4568	1.1706	2.9802	-0.5332	2.1734	7.3272	4.2906	3.4648	2.1013	3.9892	6.4418	5.2506	3.9636	2.7826	5.2449	5.8022	5.0781	1.9377	5.6241	5.8871	4.4483	1.7744	8.7987	8.8987	4.4562	5.6059	5.7989
GBM	Tumor	TCGA-06-2562-01	6.67953	4.9556	4.3527	3.9515	4.0082	5.5626	4.7814	4.6451	5.0756	3.4543	4.9108	4.7044	5.298	2.5388	3.8095	4.4829	2.1313	2.0946	4.7714	1.7828	3.5887	0.8883	1.8879	6.2651	5.3216	3.8044	1.5612	3.8481	6.6737	4.9819	4.2373	3.7453	5.7695	5.7159	5.0756	3.0199	5.5626	4.7814	4.6451	-2.6349	9.3355	8.8744	4.2442	5.1165	5.6265
GBM	Tumor	TCGA-27-2521-01	6.83944	4.9668	3.864	3.1876	4.0816	5.8148	5.4989	4.0366	4.9855	3.695	3.8451	4.5547	4.6077	2.5972	3.7149	3.9147	2.5338	-1.2481	5.0777	1.9638	1.4011	1.0779	1.6512	7.5598	4.9942	3.4116	0.8408	4.4417	6.8784	4.9792	3.8501	2.8994	5.5211	5.441	4.9855	1.8404	5.8148	5.4989	4.0366	-6.5064	8.5651	9.1929	4.1277	5.1631	5.6982
GBM	Tumor	TCGA-41-5651-01	7.51251	4.6259	4.1441	4.9336	4.0506	5.7858	5.9206	4.2884	5.9378	3.3633	4.7751	5.1173	5.3096	2.6693	3.3521	5.2346	3.8944	0.6239	6.5152	1.3109	3.7302	1.9149	2.3337	6.9164	5.432	3.8611	1.3956	4.5856	6.4858	5.0947	4.096	4.1628	5.6424	6.0555	5.9378	3.0757	5.7858	5.9206	4.2884	-3.816	9.9773	9.3238	4.6497	5.3699	5.5047
GBM	Tumor	TCGA-06-0210-01	6.32262	4.4384	3.417	3.0944	3.1409	5.4013	5.4423	4.5874	4.9203	3.3745	4.8028	4.6468	4.8555	2.2051	3.3647	4.4874	1.1117	0.6969	4.5808	1.5415	3.0038	-0.4921	1.6512	6.1926	5.009	3.2929	1.2516	3.8167	7.4413	4.8807	3.991	3.5584	6.0354	5.5126	4.9203	2.694	5.4013	5.4423	4.5874	-3.3076	8.6545	9.0345	4.0969	5.2521	5.2281
GBM	Tumor	TCGA-19-5960-01	7.45921	5.1069	4.7666	4.3758	3.6382	5.3555	6.2209	4.7148	6.3542	2.7721	4.3184	5.1599	5.5497	2.8661	3.6136	3.838	3.8581	1.8683	5.9805	1.2023	3.958	0.099	2.7051	7.2123	5.1938	4.3744	2.3788	4.9887	5.5592	5.4519	5.0255	4.9594	5.8696	6.8362	6.3542	3.644	5.3555	6.2209	4.7148	-6.5064	10.3095	9.1805	5.2932	5.7874	5.7788
GBM	Tumor	TCGA-06-0686-01	6.75352	4.4784	4.0304	3.034	3.794	4.7714	5.5148	4.0679	4.7893	3.4424	5.1684	4.7033	4.6548	2.1574	3.5436	5.4957	2.5511	0.5069	5.9477	1.105	3.287	1.0573	1.5806	7.2928	5.6966	3.2282	0.9343	4.5243	6.3461	5.4986	4.1946	2.9469	5.7827	5.3509	4.7893	2.2082	4.7714	5.5148	4.0679	-3.816	9.508	8.9916	3.7898	4.9672	5.7019
GBM	Tumor	TCGA-06-2563-01	7.18901	4.5136	4.1676	4.1923	4.1019	5.3615	5.3544	4.6183	5.0268	3.8983	4.1128	5.2672	5.1371	2.1345	3.9792	3.8136	2.1988	2.3926	5.3512	1.7273	3.794	1.9073	2.2113	6.5026	5.8455	3.6994	0.8408	3.9654	6.6169	4.5928	4.4357	3.5911	5.554	5.9002	5.0268	3.2841	5.3615	5.3544	4.6183	-9.9658	9.6474	9.257	4.2001	5.405	5.8787
GBM	Tumor	TCGA-15-1444-01	6.35946	4.3827	4.0558	3.4156	3.3321	5.3352	5.4861	4.7666	5.5441	3.3633	4.5571	4.5534	4.9878	2.6067	3.4291	3.9819	3.8511	-4.035	5.2304	1.9601	2.6984	-0.0425	2.7551	6.4425	5.0117	4.2134	1.5854	3.927	6.4634	4.6916	4.0401	3.8208	5.7613	6.5067	5.5441	2.8502	5.3352	5.4861	4.7666	-9.9658	9.3427	9.1403	4.8319	4.9069	5.5705
GBM	Tumor	TCGA-32-4213-01	4.61236	2.7993	2.5707	1.5366	2.0395	3.6782	3.7149	2.9893	2.7508	1.692	3.0706	2.0325	2.4518	0.1776	1.7053	2.7594	-0.8599	-0.8863	3.1572	-0.3022	1.0503	-2.2447	-0.3022	5.314	2.4857	1.5316	0.03	2.1606	5.9903	3.0393	1.5366	0.5568	3.9956	4.0748	2.7508	0.3346	3.6782	3.7149	2.9893	-5.5735	6.9566	7.7822	2.2783	3.2841	3.7017
GBM	Tumor	TCGA-15-0742-01	6.8668	4.3148	4.2892	4.0558	4.1261	5.7895	5.4572	3.7815	5.009	3.1939	4.9103	5.2319	5.3005	1.5216	3.2189	5.2072	2.3508	1.0779	6.3091	0.7233	3.551	1.0293	1.6785	7.2258	5.7035	2.9984	0.9642	4.597	5.7461	5.4199	3.8759	2.2693	6.0202	5.4922	5.009	2.5924	5.7895	5.4572	3.7815	-9.9658	9.992	8.8959	3.9883	5.4618	5.8014
GBM	Tumor	TCGA-06-0187-01	6.7666	4.2412	4.1318	3.1179	3.8471	5.5534	5.8866	4.3611	4.9928	3.0978	4.3548	5.2223	4.722	1.1512	4.3256	4.248	1.5266	-1.5951	5.2521	0.9716	3.3506	-0.4521	1.7532	6.2871	5.0816	3.5718	1.5316	4.0816	7.0156	4.6101	4.1883	3.345	6.0193	5.6955	4.9928	2.0946	5.5534	5.8866	4.3611	-1.3548	8.6039	8.9575	4.1458	4.9098	5.6453
GBM	Tumor	TCGA-19-1390-01	7.73468	4.235	3.928	3.5633	2.9692	5.1177	4.9468	4.7399	5.5491	2.7742	4.6525	5.2017	5.6834	2.4985	3.0585	5.0807	4.3177	-0.9132	7.1655	2.4857	3.7432	1.46	2.8158	7.1622	5.6065	3.6266	2.233	4.8856	6.2487	5.5558	4.7512	5.0304	6.356	6.6059	5.5491	3.6543	5.1177	4.9468	4.7399	-5.0116	9.9212	8.7647	4.943	4.8798	6.2719
GBM	Tumor	TCGA-06-2557-01	6.84549	4.2335	3.6359	4.1931	3.7475	5.4842	5.5913	4.3723	5.1651	3.1245	4.5286	4.9449	4.9279	2.3193	3.8116	4.6674	2.7763	0.1776	5.6941	1.2756	3.9261	1.125	2.2452	6.6646	5.5472	3.506	1.6281	4.5336	5.8253	4.7861	3.8837	3.6242	5.7851	5.2079	5.1651	3.2112	5.4842	5.5913	4.3723	-5.5735	9.4634	8.7716	4.5693	5.1847	5.5034
GBM	Tumor	TCGA-06-0878-01	7.05984	4.597	3.8866	3.6838	2.8955	5.3064	5.9239	4.839	5.3049	2.5756	4.8987	4.8084	4.9561	2.7931	3.6254	4.0833	2.6019	1.6604	5.3459	1.4652	3.8218	0.2029	2.0289	6.6051	4.5681	3.7094	1.7489	3.417	8.2832	5.204	4.6497	3.9356	5.961	6.0788	5.3049	3.3464	5.3064	5.9239	4.839	-4.2934	9.8414	8.9211	4.5614	5.1235	5.8948
GBM	Tumor	TCGA-06-0129-01	7.4796	4.4797	4.3855	3.9089	3.5237	5.2895	5.8349	4.8895	6.0231	3.3435	5.0781	5.4019	6.0881	3.0287	4.3191	3.5791	3.9506	0.6332	6.3299	2.4883	3.5994	1.8918	3.2526	6.85	6.4696	4.5454	2.4386	4.9141	6.7695	5.1388	4.6468	4.5374	5.43	6.2323	6.0231	4.1409	5.2895	5.8349	4.8895	-1.9379	9.8103	9.1849	5.504	5.3865	5.802
GBM	Tumor	TCGA-16-1045-01	6.76977	4.2781	4.1145	3.1011	2.3394	4.9709	5.1301	4.4236	4.7919	2.3953	4.1844	4.1764	4.6838	2.6185	3.5237	4.1019	2.3843	1.125	4.4784	1.3735	3.3435	-0.7834	1.8801	5.745	4.3876	3.3731	1.1833	3.7898	6.973	4.3758	3.7898	3.0145	5.8112	5.8515	4.7919	3.2602	4.9709	5.1301	4.4236	-9.9658	8.705	8.5753	4.1676	4.8758	5.3558
GBM	Tumor	TCGA-06-2567-01	6.9751	5.0841	4.1828	3.2632	3.4156	5.4313	5.5179	4.641	5.2204	3.1908	4.5898	4.7033	5.1728	2.8137	3.9175	4.812	2.3843	2.0673	5.9848	1.4911	3.4907	0.1124	1.9859	7.1428	5.3899	3.9261	2.0218	3.9645	7.4157	4.9964	4.8253	2.8341	6.1062	5.6602	5.2204	2.8779	5.4313	5.5179	4.641	-5.0116	9.5478	9.2341	4.6335	5.0955	5.7544
GBM	Tumor	TCGA-32-2616-01	7.09468	4.1128	4.0037	3.7773	3.0927	4.9883	5.5255	4.3723	4.9691	2.4985	4.6485	4.6776	5.522	2.3308	3.5559	4.6089	2.3788	1.7617	5.9331	2.8582	3.9589	-1.2481	1.1184	7.0363	4.8475	3.7061	1.9073	4.3335	6.8878	4.9663	4.6977	2.5972	6.8991	5.6227	4.9691	2.183	4.9883	5.5255	4.3723	-9.9658	9.4136	8.9488	4.6376	5.5871	6.049
GBM	Tumor	TCGA-06-0138-01	5.55332	4.4297	4.6212	2.8301	2.2842	5.2308	4.652	4.0144	3.8759	2.5658	5.3115	3.6725	4.1978	1.9034	2.982	4.3793	1.9226	0.8246	5	1.0151	1.9149	-0.6873	0.8961	5.9177	4.5832	1.8722	-0.0725	2.9618	7.3374	4.852	2.9966	2.0707	5.1855	5.2161	3.8759	2.0111	5.2308	4.652	4.0144	-2.2447	8.0443	8.2531	3.6428	4.8783	4.4404
GBM	Tumor	TCGA-28-5208-01	7.09339	5.0841	4.0471	4.0627	3.7389	5.0153	5.8202	4.796	5.2694	3.5754	4.7592	4.5104	4.7121	2.8582	3.9487	5.1926	2.081	2.0004	5.569	1.3454	3.5791	-0.8084	1.7229	7.0008	4.9819	3.869	1.2815	3.9947	7.2583	5.0175	3.6532	4.0295	5.3399	5.9623	5.2694	2.6533	5.0153	5.8202	4.796	-4.2934	10.0225	9.7003	4.2366	4.991	6.1891
GBM	Tumor	TCGA-06-1804-01	7.01915	4.1302	4.944	3.4622	4.7882	5.8588	5.4719	4.8105	5.9186	2.6255	4.5928	5.4689	5.9279	1.9264	3.6042	5.6115	3.9783	1.683	6.2561	1.8119	3.7804	-0.6193	2.4857	6.9116	6.0648	4.2343	2.2663	4.4061	6.3503	5.602	4.8783	3.7149	6.5694	6.5078	5.9186	3.2647	5.8588	5.4719	4.8105	-6.5064	10.0248	9.2285	4.9915	6.0531	5.9693
GBM	Tumor	TCGA-14-2554-01	6.09445	4.5249	4.3765	3.4251	3.4197	5.4128	5.1441	4.5808	4.6988	3.1079	4.9874	4.0696	4.1449	1.5758	2.874	4.2847	1.9712	0.7146	4.2951	1.4859	1.9786	-0.8084	1.2516	6.1573	4.4758	3.287	0.7058	2.9544	7.5187	4.7517	3.4264	3.3689	5.1946	5.2354	4.6988	1.9931	5.4128	5.1441	4.5808	-9.9658	8.574	9.0572	4.6236	4.9626	5.0913
GBM	Tumor	TCGA-27-2528-01	6.79662	4.504	3.9636	3.8788	3.7709	5.6602	5.4057	4.5454	5.0099	3.186	4.7619	4.7587	4.6713	2.2872	3.5971	4.298	2.1638	1.2023	5.383	1.6234	2.8779	0.4657	1.7273	6.4753	5.0041	3.5486	1.196	3.6928	6.567	4.9878	3.6486	3.9079	5.6186	5.8357	5.0099	2.4279	5.6602	5.4057	4.5454	-3.1714	9.5073	9.1389	3.9487	5.1044	5.6448
GBM	Tumor	TCGA-06-5858-01	6.96875	4.4516	4.0918	3.6669	3.5098	5.17	5.6622	4.7033	5.4608	3.4609	5.0409	4.838	5.2146	2.3135	3.7635	4.7981	2.7551	1.6327	5.9274	2.872	3.5098	0.1648	2.1313	6.5671	5.1835	3.8719	1.934	4.5104	6.6624	5.195	4.8022	4.3855	6.1365	5.7845	5.4608	3.0199	5.17	5.6622	4.7033	-4.035	9.7517	9.1898	5.7233	5.429	5.9973
GBM	Tumor	TCGA-06-0178-01	5.00093	5.0828	4.1236	2.9581	1.0983	4.0171	4.7704	3.4102	2.9507	3.1653	4.3349	3.7846	2.3366	2.3704	3.4318	2.233	1.7489	-5.0116	4.1368	1.6512	-0.2159	-1.685	0.3685	6.585	4.85	1.614	-0.2498	2.1444	5.8387	3.83	2.3019	0.8082	3.8095	4.0601	2.9507	1.1641	4.0171	4.7704	3.4102	-9.9658	6.5987	9.2417	2.8482	4.1668	4.1474
GBM	Tumor	TCGA-14-1823-01	5.31906	5.0657	4.859	3.1491	2.108	5.1086	5.0597	4.1252	3.7603	2.7636	4.5736	3.9746	4.0488	1.9149	3.4933	2.9581	0.7321	-9.9658	4.232	1.4065	1.2394	-0.9406	0.7579	5.572	4.1604	2.4439	-0.0425	2.043	7.5119	4.4608	3.2251	1.9073	5.131	4.3583	3.7603	2.6533	5.1086	5.0597	4.1252	-9.9658	7.5234	8.8188	3.7432	5.5744	4.5964
GBM	Tumor	TCGA-06-0743-01	6.61617	3.7667	3.5923	3.4856	4.14	5.3082	4.7976	3.6077	4.7383	2.9692	4.6358	5.1019	5.3096	1.9564	3.0637	4.7565	3.1637	0.7058	5.9479	0.8082	2.4701	0.4233	1.3901	6.4925	5.2873	2.6715	0.2881	3.4048	6.5554	5.0041	3.0428	2.9839	5.5937	4.9364	4.7383	2.5511	5.3082	4.7976	3.6077	-4.2934	9.6003	8.1081	3.6748	4.842	5.2998
GBMLGG	Tumor	TCGA-19-1787-01	6.64052	3.9983	3.2127	3.3675	3.7518	4.9031	5.6739	3.9626	5.0383	3.8187	4.4919	5.3951	4.5516	2.2082	3.6497	4.8655	2.8422	1.7009	6.1316	2.1798	3.0163	-0.5543	1.3283	7.2312	4.3555	3.3492	2.0111	4.1343	6.5784	4.7608	4.3674	3.5682	5.6361	4.8167	5.0383	2.1444	4.9031	5.6739	3.9626	-3.458	9.3183	9.0338	5.691	5.2536	5.9336
GBMLGG	Tumor	TCGA-S9-A7J2-01	6.33289	4.2427	3.5161	3.2766	3.8886	5.4797	4.4054	4.511	5.7605	3.0074	4.4713	5.0081	5.0601	2.2723	2.7336	5.1301	4.4344	-3.0469	5.5568	1.6234	3.2389	0.8488	3.2049	6.1279	5.5958	4.3506	1.4281	4.0739	5.6326	5.0229	4.2343	4.2601	5.4413	6.2003	5.7605	3.4971	5.4797	4.4054	4.511	-9.9658	9.3636	9.105	5.1732	5.6279	5.005
GBMLGG	Tumor	TCGA-E1-A7YI-01	7.30256	4.8788	4.4384	3.6894	4.1036	5.5317	5.9903	4.9256	5.9305	3.7072	3.9118	6.2046	4.6999	2.6395	4.0242	3.0199	4.3364	0.0158	6.6478	3.1045	3.7421	1.1706	3.1924	7.1288	6.0947	4.298	2.7139	5.2289	6.3705	5.9894	4.2119	5.3951	5.6271	6.0646	5.9305	3.5098	5.5317	5.9903	4.9256	-9.9658	10.0549	9.396	5.2331	5.4764	6.1526
GBMLGG	Tumor	TCGA-06-5412-01	6.14511	4.3667	4.2235	3.2885	3.1797	5.0549	5.2525	4.1409	4.4423	3.0688	4.8177	4.3463	4.7496	2.2019	3.7846	4.0019	1.6187	0.4967	4.3421	1.0363	2.7847	-1.0262	1.0779	6.3228	4.582	3.0637	0.6145	3.3192	6.9047	4.391	3.4143	2.5634	5.3674	5.1107	4.4423	2.2051	5.0549	5.2525	4.1409	-9.9658	8.9107	8.7371	3.7116	4.7203	5.2273
GBMLGG	Tumor	TCGA-DU-7302-01	6.07533	4.7388	4.3442	4.0127	2.3536	5.3886	5.1676	5.0113	5.3406	2.4279	4.5261	4.7523	4.8866	2.8034	3.5149	4.4777	3.74	-4.035	5.2384	1.9452	3.0002	-0.4521	2.3649	5.8761	6.4743	3.928	1.642	4.0497	5.8543	4.6905	4.5892	5.1152	5.897	6.9298	5.3406	3.7741	5.3886	5.1676	5.0113	-6.5064	9.302	9.3202	5.153	5.6268	5.3266
GBMLGG	Tumor	TCGA-DU-A7TI-01	6.32963	3.991	3.9041	3.2526	3.5815	5.3789	5.3452	4.2358	5.753	2.8974	4.6719	5.7576	4.9621	2.6138	3.1245	3.2112	3.867	-1.685	5.2196	1.5366	3.0199	-0.1345	2.8522	6.09	5.4797	4.1153	2.2482	4.1376	6.1817	4.5796	3.6195	4.1011	5.6329	6.5078	5.753	3.5136	5.3789	5.3452	4.2358	-9.9658	9.5082	8.9873	5.1914	5.0726	5.1227
GBMLGG	Tumor	TCGA-12-5299-01	6.40224	4.6218	4.443	3.0376	3.4102	5.2468	5.4631	4.4108	4.9016	3.4856	4.546	4.1294	4.4095	2.3536	3.6347	5.0562	1.0847	0.099	4.4283	0.8164	2.7161	-1.4699	1.2576	6.753	5.0291	3.208	1.0079	3.8218	6.0706	4.8064	4.4162	3.2435	5.7052	5.4951	4.9016	1.6374	5.2468	5.4631	4.4108	-4.6082	9.0771	9.4636	3.7794	5.1724	5.5626
GBMLGG	Tumor	TCGA-P5-A5EX-01	5.96781	3.944	3.6393	3.1572	3.3321	4.7804	4.3162	3.8964	5.0104	2.2175	5.0747	4.0171	4.8817	1.6234	2.1247	3.7678	2.2082	-1.685	3.9626	2.3222	1.9601	-1.1488	1.196	5.9887	4.8223	3.9166	0.6517	3.4945	6.6039	5.1827	2.6579	3.9431	6.1683	5.689	5.0104	2.7249	4.7804	4.3162	3.8964	-5.5735	8.6422	8.6931	4.1376	4.5249	5.2111
GBMLGG	Tumor	TCGA-HT-8563-01	6.44968	3.9965	3.958	3.242	3.1669	5.7918	5.2335	4.5832	5.2574	2.3077	4.2427	4.6571	5.2122	2.8779	3.7667	3.7857	3.0181	-0.5543	4.7539	2.183	2.9319	0.0718	2.3423	5.4835	5.3491	4.5053	1.8643	3.7762	7.8467	4.9969	3.7877	4.1061	5.9704	5.947	5.2574	3.7302	5.7918	5.2335	4.5832	-6.5064	9.2316	8.8209	4.2631	4.8182	5.2836
GBMLGG	Tumor	TCGA-FG-A60K-01	6.03012	4.3285	4.2803	2.9655	3.5742	5.3488	4.2751	4.597	5.7605	3.3717	4.7819	4.3723	5.0709	2.7742	2.753	5.0295	3.9365	-1.0559	4.7383	1.6374	2.8199	-0.4921	3.055	5.8696	5.7458	4.0046	0.5859	3.7709	5.9374	4.7725	3.9299	4.2906	5.437	6.2858	5.7605	3.5559	5.3488	4.2751	4.597	-9.9658	9.5499	9.0553	5.0833	5.4091	5.1571
GBMLGG	Tumor	TCGA-06-2565-01	7.36089	4.7976	3.9022	4.4067	3.9506	5.7369	4.8665	5.1044	5.838	3.6219	4.8022	5.4229	5.5946	2.6647	3.8571	4.562	3.3105	2.2842	6.0781	1.7185	4.1668	1.1117	3.1278	6.3241	6.3225	3.927	1.6558	4.3075	7.0879	4.6566	4.1539	4.3562	5.7632	6.3327	5.838	3.9947	5.7369	4.8665	5.1044	-9.9658	9.7019	9.3142	4.9946	5.3772	5.6445
GBMLGG	Tumor	TCGA-06-2561-01	6.2854	4.0295	4.1128	3.2662	2.8661	5.0414	5.2627	4.3869	4.8929	2.1574	4.3944	5.1676	4.8973	2.496	3.3393	4.5802	2.5462	-0.3383	4.66	1.3225	3.3633	-0.6873	1.9226	5.9336	4.445	3.5073	1.0779	3.5851	5.8483	4.6433	3.9719	3.8769	5.033	5.94	4.8929	3.4856	5.0414	5.2627	4.3869	-9.9658	9.1901	8.3964	4.3938	5.1966	5.2619
GBMLGG	Tumor	TCGA-CS-5397-01	6.31383	4.197	4.2788	4.0401	3.4237	5.7562	5.4081	5.044	5.3238	2.8321	4.5091	4.0841	4.6358	2.96	3.9002	4.5717	2.8661	2.0742	4.7005	1.3283	3.2112	-0.4131	2.6738	6.0566	4.6966	4.3421	2.05	3.945	5.7192	4.3848	4.7431	4.8615	5.8662	6.6075	5.3238	3.186	5.7562	5.4081	5.044	-9.9658	9.1483	8.9874	4.4509	5.5173	5.2869
GBMLGG	Tumor	TCGA-E1-5322-01	6.56342	4.6977	3.5935	3.5923	3.0323	5.1591	5.5277	4.4549	5.803	3.5262	4.7825	4.4549	4.5154	2.5112	3.616	4.382	4.2235	-3.458	4.976	1.8801	2.9488	-0.3752	2.9839	6.4796	4.9607	4.4476	2.3953	3.5022	5.2445	4.9919	4.3492	4.1724	5.9296	6.3144	5.803	2.7401	5.1591	5.5277	4.4549	-9.9658	9.006	9.4883	4.4861	5.1318	5.3844
GBMLGG	Tumor	TCGA-HT-8558-01	4.41213	4.1244	3.5621	3.4437	4.0462	4.6713	5.2165	4.1644	5.257	2.4779	4.3681	3.402	4.3903	2.2206	3.417	4.3548	2.8542	-2.9324	4.1732	0.7493	2.4465	-1.7809	1.3511	5.4145	4.4463	3.2692	0.9716	3.4517	5.7088	4.235	3.8198	4.6165	6.1502	6.669	5.257	3.2766	4.6713	5.2165	4.1644	-9.9658	8.6666	8.3625	4.8274	5.3972	4.3723
GBMLGG	Tumor	TCGA-S9-A6U8-01	6.21316	3.8501	3.6894	3.0252	3.795	5.2114	5.2586	4.2943	5.8352	3.1179	4.6347	4.3793	5.2529	2.108	3.3379	4.0118	4.0153	-1.1488	4.9723	1.7912	3.1987	-0.3566	2.7847	6.1577	5.4871	3.7248	1.4808	4.2041	5.7682	5.0601	3.6816	4.3869	5.7057	6.3038	5.8352	3.1797	5.2114	5.2586	4.2943	-9.9658	9.4001	9.0336	5.0104	4.847	5.1811
GBMLGG	Tumor	TCGA-HT-7854-01	6.15162	3.864	3.335	3.0181	3.4752	5.0854	4.9915	4.4803	5.6792	2.8361	4.2289	3.7116	4.7512	2.77	3.5374	4.0082	2.7357	1.0642	3.6324	0.9268	3.2511	-1.4699	2.5828	5.7853	4.7661	4.2951	1.7403	3.8551	6.4922	4.3958	3.9654	4.701	5.7916	6.1336	5.6792	3.0654	5.0854	4.9915	4.4803	-9.9658	8.8472	8.944	5.0277	5.1547	4.9621
GBMLGG	Tumor	TCGA-HT-7467-01	5.33983	3.7248	3.5473	3.0893	3.3206	4.7203	4.4719	4.0807	5.4397	2.667	4.1612	3.5923	4.2281	2.004	3.2572	3.6018	3.0234	-2.5479	4.5318	1.1316	2.6579	-0.7834	2.1766	5.4196	4.5479	3.4984	1.0151	3.2929	5.318	4.1652	3.9318	4.5274	5.5747	5.9565	5.4397	2.9032	4.7203	4.4719	4.0807	-9.9658	8.7843	8.5172	4.7181	5.0104	4.3869
GBMLGG	Tumor	TCGA-HT-7874-01	4.98775	4.2204	3.7204	3.3119	3.5424	4.9778	5.0117	4.4337	5.5135	2.7073	4.3562	3.7039	4.3737	2.5011	3.6714	4.1523	2.9032	-2.3147	4.0901	1.3454	2.7357	-1.1172	2.2144	5.5062	4.3119	3.866	1.3679	3.6301	5.6091	4.0748	4.0091	4.7762	5.8836	6.5746	5.5135	3.1344	4.9778	5.0117	4.4337	-9.9658	8.7282	8.4986	4.9828	5.5274	4.6662
GBMLGG	Tumor	TCGA-S9-A6TV-01	7.11801	3.5449	4.1474	3.4061	3.9089	5.7453	5.3678	4.0575	5.4719	3.3076	5.119	5.3664	5.0268	1.3109	3.6277	3.4739	3.5274	-2.5479	5.2578	2.5061	2.4171	-0.6193	2.0946	6.7116	5.6888	4.2526	1.7744	4.3328	7.7713	5.3702	3.2602	3.0859	6.0798	5.6494	5.4719	3.2158	5.7453	5.3678	4.0575	-9.9658	9.3609	9.0704	4.588	5.3187	5.1631
GBMLGG	Tumor	TCGA-VM-A8CD-01	6.21099	4.2609	4.1425	3.402	3.3787	4.9727	5.142	4.0952	4.9672	1.8524	4.3148	5.0811	4.6364	2.6715	3.8788	4.4855	2.2813	-0.013	5.2649	0.517	3.0411	-1.685	1.6649	6.3376	4.1907	3.833	1.8957	3.5111	5.9011	4.6697	3.3393	3.1442	5.2773	5.8753	4.9672	3.1129	4.9727	5.142	4.0952	-9.9658	9.3998	8.2592	4.6154	4.8655	5.0157
GBMLGG	Tumor	TCGA-06-0132-01	5.15707	3.8905	3.4398	2.5536	2.6579	4.5904	4.849	4.3227	4.0824	2.7657	4.5429	3.3421	3.7149	2.2813	3.1765	3.9156	1.4962	-1.2481	3.9041	0.9789	1.9377	-2.0529	0.7832	5.5056	3.5682	2.3788	0.3796	2.7357	7.4669	4.4951	3.2049	2.7931	5.306	5.1478	4.0824	1.8323	4.5904	4.849	4.3227	-9.9658	7.7296	8.261	3.7335	4.9012	4.8445
GBMLGG	Tumor	TCGA-HT-7616-01	5.88264	4.7214	3.695	3.7028	2.8076	5.5479	4.6905	4.7345	6.1225	3.2692	4.5886	4.4739	4.9865	3.0723	2.8955	4.6531	3.5572	-1.5105	4.9933	1.7995	2.6487	-0.8599	2.8117	5.9246	4.8007	5.1571	1.5266	3.5657	6.3158	5.1656	4.504	3.9356	5.6597	5.6969	6.1225	3.741	5.5479	4.6905	4.7345	-9.9658	9.3636	9.45	5.2005	5.6453	4.9933
GBMLGG	Tumor	TCGA-KT-A7W1-01	7.99476	4.2312	4.0153	3.8421	4.085	5.4243	5.861	4.5844	5.588	3.3856	4.5104	5.4935	5.6473	2.7007	4.1539	4.9594	2.5585	1.8996	7.0068	1.7141	4.4874	1.6327	2.8096	6.8999	5.7882	4.079	2.4544	4.4926	6.2935	5.1712	4.4142	4.5021	5.9026	6.1465	5.588	3.9232	5.4243	5.861	4.5844	-6.5064	10.6503	9.5087	4.8788	5.3223	6.7158
GBMLGG	Tumor	TCGA-P5-A5F2-01	5.84047	4.0696	3.5149	3.0092	3.1924	5.1688	4.9284	3.8501	5.4842	2.1411	4.0383	4.2751	4.8253	1.9188	3.38	2.8422	3.9137	-2.6349	4.5608	0.4657	2.694	-0.6193	1.9149	5.7488	5.4712	3.2677	1.2934	3.2143	4.8949	4.843	3.3521	3.8896	5.9709	6.6837	5.4842	2.93	5.1688	4.9284	3.8501	-9.9658	9.2346	9.0134	4.2646	4.5608	5.3071
GBMLGG	Tumor	TCGA-19-2629-01	7.27126	4.3597	4.3406	3.603	3.5815	5.3629	5.6753	4.1285	5.101	2.826	4.7555	4.6983	5.2525	2.8462	3.83	3.1129	2.4883	-5.0116	6.3149	0.6145	2.2237	-0.4719	1.8524	7.1534	4.1252	3.5449	1.1117	4.573	6.6621	5.1538	3.869	3.7992	6.2277	6.5569	5.101	2.6624	5.3629	5.6753	4.1285	-9.9658	9.1347	9.0297	4.3772	5.0251	5.9778
GBMLGG	Tumor	TCGA-HT-7607-01	5.11315	4.1804	3.2511	3.449	3.154	5.1469	4.854	4.1628	5.2563	2.7336	4.6972	3.66	4.284	2.4571	3.3605	4.0799	3.0446	-1.9379	4.2212	0.9568	2.3564	-0.9686	1.9712	5.44	4.3999	3.795	1.2209	3.5994	5.6103	4.2358	3.7992	4.6422	5.9472	6.6705	5.2563	3.0961	5.1469	4.854	4.1628	-9.9658	8.7136	8.4475	4.8495	5.5482	4.5934
GBMLGG	Tumor	TCGA-06-0238-01	5.8392	4.4926	4.0593	3.3421	2.496	4.5559	5.0777	4.0037	4.4964	3.3206	4.5693	4.298	4.2825	1.9786	2.9281	4.2721	1.7828	0.2881	5.0514	0.7321	2.3704	0.058	1.3051	6.4114	5.0579	2.4412	0.5955	3.0876	6.3051	4.7507	3.2405	2.6873	4.8182	5.0514	4.4964	1.7229	4.5559	5.0777	4.0037	-4.6082	8.986	9.1542	3.9185	4.8793	4.8881
GBMLGG	Tumor	TCGA-HT-7873-01	7.30385	4.2906	4.5778	3.1129	3.6816	5.3992	5.432	4.8465	6.1156	3.0305	4.4443	5.7211	4.5009	2.7379	3.9765	3.0358	5.6224	-1.6394	5.1631	2.7636	3.5779	0.6425	3.3393	6.2521	5.9345	4.306	2.2144	4.1986	5.8136	5.2825	4.1946	4.0427	5.4944	6.4153	6.1156	3.8431	5.3992	5.432	4.8465	-4.2934	9.7523	9.2002	4.9519	4.996	5.436
GBMLGG	Tumor	TCGA-06-0749-01	5.68989	3.834	4.0037	2.4675	3.7171	4.6381	4.5311	3.3549	4.4641	2.8219	4.86	4.1103	4.4588	1.4547	2.6918	4.7127	2.2113	0.099	4.6662	0.547	2.2513	-0.9406	0.4657	6.0525	4.4404	2.2753	0.2998	3.1442	6.4207	5.0939	2.9281	2.5188	5.7323	4.8033	4.4641	1.6875	4.6381	4.5311	3.3549	-9.9658	8.7701	8.274	3.5779	4.9883	4.722
GBMLGG	Tumor	TCGA-HT-7603-01	4.44093	4.4013	4.0909	3.3703	3.453	5.0905	5.5922	4.6071	5.4855	2.6805	5.0184	3.0995	4.5693	1.9149	2.8137	4.0198	3.1179	-2.8262	4.0427	0.7748	2.1606	-1.9942	1.6875	6.0043	4.5405	3.074	0.9343	3.3773	6.2124	5.0726	3.4543	4.0471	5.9864	5.9568	5.4855	2.9692	5.0905	5.5922	4.6071	-9.9658	9.0509	9.0481	4.8832	5.4253	4.0619
GBMLGG	Tumor	TCGA-DB-A64P-01	6.05878	4.3492	3.8876	2.7205	3.2389	5.1392	4.149	4.2714	5.4568	3.1908	4.4054	4.7291	4.7746	2.4779	2.5828	1.934	3.4318	-2.9324	5.0777	1.0711	1.9931	-0.8863	2.6441	6.4411	4.7187	3.9204	0.5955	3.5337	5.957	4.8289	3.4984	3.838	5.4588	5.6761	5.4568	2.8055	5.1392	4.149	4.2714	-9.9658	9.0968	8.8492	4.5243	5.5248	4.6531
GBMLGG	Tumor	TCGA-06-0174-01	7.02759	4.5778	4.3406	3.8621	3.4945	5.2884	5.8217	4.7887	5.1788	3.4804	4.9533	4.4932	4.8324	2.5036	3.5935	4.6583	2.4439	1.6327	5.6818	1.4228	3.5486	0.8164	1.9226	7.2576	5.1656	3.29	1.9564	4.3413	6.619	5.1157	4.8074	3.7291	5.7822	6.1281	5.1788	2.4171	5.2884	5.8217	4.7887	-3.1714	9.599	9.4564	4.2951	5.3399	5.8575
GBMLGG	Tumor	TCGA-HW-7486-01	5.60492	4.5021	3.7313	3.3192	3.2944	5.033	4.6335	4.1094	5.5996	2.7465	4.849	3.7898	4.4919	2.6464	3.2236	4.433	3.2647	-3.0469	4.4608	1.4441	2.4117	-0.8339	2.7029	6.0672	4.573	4.0136	1.0293	3.9099	5.6288	4.6571	4.026	4.4764	5.764	6.3149	5.5996	2.7401	5.033	4.6335	4.1094	-9.9658	9.036	8.896	4.5028	5.1555	4.7148
GBMLGG	Tumor	TCGA-P5-A5F1-01	6.04923	4.0436	3.7783	2.3677	4.1907	4.9686	4.6747	4.2009	5.0273	3.0859	4.5826	4.0584	4.5958	2.2113	2.8055	3.3869	3.4156	-3.6259	4.2781	1.6875	2.1313	-1.5951	1.5709	6.1281	5.322	3.1228	0.7233	3.3869	6.0288	5.4787	3.4224	3.1939	5.846	6.1567	5.0273	1.6093	4.9686	4.6747	4.2009	-9.9658	8.9161	9.0197	4.3903	4.6364	5.2453
GBMLGG	Tumor	TCGA-DU-7011-01	5.3413	3.7356	3.5572	2.6019	2.1114	4.3406	4.7302	3.9709	5.0837	2.6208	3.9673	3.3379	3.8269	1.8801	2.8381	3.154	3.1311	-1.5522	3.8915	0.7233	1.9601	-1.4699	2.2421	5.1792	4.1203	3.3661	1.1706	3.2127	5.4337	4.1748	3.6566	3.9719	5.0867	5.9093	5.0837	2.4412	4.3406	4.7302	3.9709	-9.9658	8.6828	8.924	4.4027	4.8435	4.6012
GBMLGG	Tumor	TCGA-P5-A77X-01	5.13054	4.1474	3.5535	2.9966	2.6556	4.9251	4.2327	4.0841	5.4199	1.5563	3.8064	4.1684	4.8017	2.5388	2.2082	2.5087	4.1539	-4.035	4.2495	0.9935	2.3592	-0.5332	2.6441	5.4948	4.5436	3.6347	0.4865	3.2267	5.2646	4.8028	3.5287	3.7389	5.5189	5.8607	5.4199	3.091	4.9251	4.2327	4.0841	-9.9658	9.3463	8.3205	4.5982	4.9547	4.281
GBMLGG	Tumor	TCGA-HW-7493-01	5.9873	4.1228	3.5633	3.3032	2.7007	5.0036	5.176	4.6404	5.5138	2.6325	4.0688	3.6509	4.1294	2.7095	3.0825	2.6325	3.5136	-2.6349	4.2781	2.3019	2.4225	-1.2828	2.4831	5.5534	4.6312	4.0619	1.8762	3.7992	6.0676	4.2714	4.2669	4.8425	5.6656	7.1789	5.5138	2.7401	5.0036	5.176	4.6404	-9.9658	9.1536	9.1269	4.5224	5.0514	5.1607
GBMLGG	Tumor	TCGA-VM-A8CA-01	5.2307	3.695	4.0073	2.7636	3.5875	4.673	4.01	3.1458	4.861	2.2082	4.9621	3.1278	4.4686	1.3109	1.7009	4.0523	3.0217	-3.3076	4.3133	-0.3566	1.7229	-1.2828	0.7664	6.3124	4.6708	2.3222	0.6145	3.1475	5.2961	5.2381	2.7292	2.7379	5.6591	5.3583	4.861	1.6327	4.673	4.01	3.1458	-9.9658	8.7581	8.5543	3.9645	4.9074	4.3046
GBMLGG	Tumor	TCGA-DU-7015-01	6.1532	4.3039	3.9515	3.2096	3.3435	5.0934	5.3844	4.6468	5.6753	3.0252	4.2855	4.0189	4.4033	2.0254	3.5449	4.1441	3.2617	-2.2447	4.835	1.8363	2.2663	-0.9132	3.2018	5.9442	4.7388	4.0064	1.7744	3.9166	5.9653	4.5862	4.1318	4.641	5.2672	6.7799	5.6753	2.6395	5.0934	5.3844	4.6468	-9.9658	9.2584	9.2814	4.3992	4.8345	5.0166
GBMLGG	Tumor	TCGA-TM-A7C5-01	5.5868	4.0127	4.2103	3.4804	3.0217	4.9007	4.1978	3.9478	4.892	2.7615	4.3213	4.5034	4.6317	2.0844	2.5658	0.8568	3.4398	-4.2934	5.0352	1.2147	1.736	-0.2845	1.7702	5.8385	5.2072	2.93	0.6517	3.4331	5.2518	4.6668	3.7909	4.1555	5.0131	5.6393	4.892	2.8799	4.9007	4.1978	3.9478	-9.9658	9.1752	8.9506	4.677	5.3277	4.4483
GBMLGG	Tumor	TCGA-DU-8162-01	5.48837	4.0331	3.4894	3.6939	3.1028	4.8263	5.0063	4.5192	5.3042	2.4198	4.347	3.4331	4.3053	2.328	3.6497	4.7485	3.3731	-0.4521	4.551	1.3901	2.7357	-1.2142	2.118	5.3241	4.1203	3.8827	1.5064	3.5161	5.7071	3.5923	4.0884	4.8665	5.8592	6.5489	5.3042	3.3979	4.8263	5.0063	4.5192	-9.9658	9.0012	8.5951	4.889	5.428	4.7893
GBMLGG	Tumor	TCGA-TM-A84O-01	6.21661	4.1061	3.8421	3.2481	3.5449	4.9486	4.3772	4.1384	5.464	2.9655	4.1359	4.5922	4.86	2.5061	2.2206	4.1027	3.8147	-4.035	5.0751	1.5266	3.0757	0.4016	2.7357	5.7795	5.2884	3.6657	0.7233	3.4156	5.3906	4.89	3.6657	4.0799	5.3537	6.0953	5.464	2.971	4.9486	4.3772	4.1384	-6.5064	9.1317	8.8269	4.851	4.8334	5.0913
GBMLGG	Tumor	TCGA-06-5410-01	5.84352	3.9792	3.8591	3.1261	2.9544	4.5479	4.9677	3.9365	4.2009	2.8055	4.3385	3.9654	4.425	2.0147	3.3134	4.4067	1.4011	-1.0262	4.0162	0.6425	2.6918	-1.8836	1.2875	5.9194	4.2929	3.0287	0.605	3.2127	7.2369	4.2914	3.0127	3.1311	5.5223	4.4122	4.2009	2.128	4.5479	4.9677	3.9365	-9.9658	8.5471	8.839	3.2065	4.3772	4.943
GBMLGG	Tumor	TCGA-S9-A7R3-01	5.81454	3.9829	3.7667	2.971	3.3689	5.0027	4.856	3.8739	5.7856	2.5487	4.8545	3.9691	5.0879	2.3451	3.2049	3.5337	4.3213	-2.1779	4.4047	1.3397	2.6067	-0.7834	2.2051	6.051	5.7911	3.4984	1.8036	3.8501	5.206	5.3576	3.4156	4.1019	5.7892	6.2612	5.7856	2.9562	5.0027	4.856	3.8739	-9.9658	9.5491	9.1268	4.7798	4.917	5.0304
GBMLGG	Tumor	TCGA-TQ-A7RN-01	6.03672	4.3924	4.0679	3.1327	3.4277	5.4667	4.437	4.3119	5.7722	2.8582	4.8069	4.6485	5.0023	3.027	2.9224	3.7226	3.8441	-2.9324	5.4423	1.2875	3.0688	-0.394	3.2647	6.2424	5.3352	4.4647	1.5316	4.0287	5.8217	4.8156	3.9801	4.3024	5.3551	6.337	5.7722	3.453	5.4667	4.437	4.3119	-9.9658	9.2985	8.7716	5.0989	5.9021	5.0985
GBMLGG	Tumor	TCGA-28-2513-01	6.60855	4.0287	4.0454	3.4048	3.7204	6.1283	4.9379	4.1883	4.3349	3.0791	4.6713	3.6254	4.4516	1.7185	3.2282	4.3371	1.4911	1.0293	4.8851	0.6608	2.3953	-0.8599	1.177	6.3014	3.4344	3.1145	0.7748	3.5863	8.031	4.437	3.5839	3.2692	5.8602	5.6259	4.3349	2.2299	6.1283	4.9379	4.1883	-5.5735	8.5962	8.4637	3.4622	4.5856	5.2211
GBMLGG	Tumor	TCGA-DU-A6S6-01	5.99025	3.864	3.6335	3.1327	4.0028	5.347	4.4509	3.8944	5.478	2.6464	4.1962	4.4297	5.1235	2.0183	2.9167	4.3111	3.5608	-3.458	5.0246	1.3051	2.9747	-0.4719	2.4008	6.3209	5.2888	3.0092	0.9716	4.2297	5.1102	4.6798	4.1756	4.4932	5.825	6.1853	5.478	2.7784	5.347	4.4509	3.8944	-9.9658	8.9549	8.5202	4.7442	5.1202	4.5072
GBMLGG	Tumor	TCGA-P5-A735-01	6.14264	4.0427	3.4088	3.0145	4.0383	5.3424	5.1664	3.8521	5.6725	2.8779	4.4977	4.4764	5.2361	2.0111	3.2929	3.832	3.4358	-2.114	5.0631	0.688	2.9432	-0.6416	2.167	6.8165	5.3078	2.5036	0.7579	4.3688	5.5772	5.3466	3.4451	3.8501	5.7709	5.9397	5.6725	2.3337	5.3424	5.1664	3.8521	-9.9658	9.4216	9.2696	4.2465	4.6029	4.6445
GBMLGG	Tumor	TCGA-HT-7691-01	5.6062	3.871	3.8421	2.6114	3.5047	5.0981	4.6882	4.0028	5.0409	2.8916	4.4823	3.4843	4.373	2.2391	2.7868	4.2503	2.8622	0.4967	3.8993	1.177	2.0878	-2.0529	1.7446	5.7845	4.7991	3.2662	1.0433	3.0393	5.7682	4.8475	3.0859	3.7496	5.3754	6.0499	5.0409	2.5288	5.0981	4.6882	4.0028	-9.9658	9.168	9.0391	4.3793	4.4337	5.0273
GBMLGG	Tumor	TCGA-FG-A6J1-01	5.55704	4.1053	4.0269	2.5112	4.5268	4.6323	3.7919	3.0411	4.1812	2.2723	5.4809	3.8729	4.3046	1.0847	1.8683	4.9026	3.2236	-5.0116	4.9026	-0.1828	1.6964	-2.3147	0.5666	6.6247	4.3924	1.6512	-0.0725	3.0498	5.4784	5.2601	2.3366	2.4883	4.8724	4.2442	4.1812	1.5013	4.6323	3.7919	3.0411	-9.9658	8.1994	8.7222	3.741	5.0588	4.034
GBMLGG	Tumor	TCGA-S9-A7R7-01	6.53819	3.9543	3.9956	2.9729	3.7324	6.1987	5.2616	4.5723	5.3985	2.876	3.9318	5.0122	4.4243	2.7139	3.4881	3.3938	3.2722	-2.0529	4.7624	2.0004	3.0774	-0.5756	2.1988	5.7504	5.0532	4.4881	1.8801	4.085	6.3537	5.0661	3.6054	4.4771	5.9939	6.479	5.3985	2.5437	6.1987	5.2616	4.5723	-6.5064	9.0922	8.8972	4.421	4.9444	5.4667
GBMLGG	Tumor	TCGA-76-4929-01	6.14363	4.38	4.84	4.2526	3.3787	5.8652	5.845	4.1604	5.2795	2.5288	4.858	4.8248	5.1744	2.1345	4.0127	5.204	2.5288	0.7916	5.0193	1.1577	3.8136	0.0158	2.4063	7.1325	4.8958	4.1169	1.7273	4.6023	5.6349	5.3049	4.479	2.9984	6.6122	6.845	5.2795	2.7029	5.8652	5.845	4.1604	-6.5064	9.2186	8.856	4.5318	5.537	5.2932
GBMLGG	Tumor	TCGA-DU-6402-01	7.50605	4.1636	3.5362	3.0808	4.2631	5.3169	5.5865	3.831	4.889	3.335	4.5098	4.9801	5.0575	1.9111	3.7378	4.6124	1.4335	0.7493	5.3056	1.2394	3.0619	-0.5125	1.46	6.8125	3.7836	3.795	1.2576	4.0028	6.466	4.9973	3.7667	4.1844	6.0605	5.9291	4.889	2.8442	5.3169	5.5865	3.831	-3.6259	9.367	8.744	3.8218	4.6854	5.9011
GBMLGG	Tumor	TCGA-HT-7684-01	5.07423	3.7389	2.7205	2.2842	3.2389	4.7077	4.3349	3.0323	4.7756	2.694	4.4894	3.5136	3.695	1.8282	1.8879	3.242	2.0776	-5.5735	3.0978	-0.5125	0.605	-3.6259	0.9789	6.0817	3.8064	1.8282	0.7579	2.8779	5.3381	4.4842	2.2268	2.7117	5.9244	5.2242	4.7756	0.7493	4.7077	4.3349	3.0323	-9.9658	7.834	9.4626	3.3221	4.4556	4.6047
GBMLGG	Tumor	TCGA-HT-8104-01	7.10441	4.4745	4.2714	3.9515	4.1335	6.3567	5.5925	4.9069	5.613	3.0568	4.889	4.7377	4.9146	2.6715	4.0765	4.6611	2.9637	1.2333	5.8841	1.5902	3.4778	0.2998	2.5924	6.5913	5.429	4.2639	2.3106	4.2586	7.0896	4.6798	4.5324	4.6277	5.691	6.3183	5.613	3.2856	6.3567	5.5925	4.9069	-9.9658	9.8662	9.2766	4.5293	5.2743	5.5802
GBMLGG	Tumor	TCGA-FN-7833-01	6.31176	4.3541	3.2282	3.3577	3.5022	5.3111	5.2208	4.2165	6.0989	3.287	4.7225	4.7656	4.906	2.4675	3.4881	4.1343	3.6359	-0.3752	5.0536	1.2934	3.1062	-0.3566	2.9109	6.2321	5.5295	3.7389	1.9638	4.0091	5.6212	4.7645	3.7667	4.3206	5.505	6.4769	6.0989	3.5766	5.3111	5.2208	4.2165	-6.5064	9.3791	9.2755	5.022	4.6177	5.119
GBMLGG	Tumor	TCGA-HT-7473-01	6.26546	4.0523	3.9819	2.9338	3.2018	5.1367	5.114	4.5856	5.9677	2.9432	4.9594	4.4719	4.6433	2.7029	3.3633	3.6382	4.0082	-0.7834	4.2914	2.8361	3.0323	-0.4719	3.1637	5.4754	5.0387	4.4842	1.736	3.7215	6.2173	4.4397	4.4483	4.6983	5.5277	6.5078	5.9677	3.0038	5.1367	5.114	4.5856	-9.9658	9.4058	9.1473	4.8177	4.9036	5.138
GBMLGG	Tumor	TCGA-06-0645-01	6.68696	4.232	3.7378	3.4197	3.6646	5.7586	5.1851	4.1368	4.6793	3.0163	4.7049	4.497	5.07	2.0912	3.5596	4.5479	1.683	-0.394	5.1306	1.1316	2.7139	-0.3022	1.46	6.3034	4.8778	2.9319	1.0363	3.7215	8.1623	4.5583	3.9478	2.982	5.3463	5.0993	4.6793	2.4805	5.7586	5.1851	4.1368	-5.0116	9.0373	8.8883	3.5682	4.7044	5.2987
GBMLGG	Tumor	TCGA-HT-8019-01	3.98736	3.7846	3.0074	2.8622	3.4945	4.0892	4.6171	3.4197	4.5669	2.081	3.8269	3.1876	3.8531	1.4859	2.7205	3.8441	2.561	-2.9324	3.9147	0.099	2.1345	-1.3921	0.4233	4.7367	3.97	2.4779	0.1124	3.0654	5.0273	3.7571	2.8442	3.6125	5.6448	5.8475	4.5669	2.7205	4.0892	4.6171	3.4197	-9.9658	8.0433	7.5928	4.3876	4.9468	3.6324
GBMLGG	Tumor	TCGA-TQ-A7RU-01	6.28076	4.4277	4.5687	3.5199	3.8421	5.6235	4.5802	4.5386	5.837	3.2602	4.9769	4.8445	5.166	2.6302	2.6783	2.7951	4.2929	-3.1714	5.7211	1.4859	3.2389	0.5069	2.8602	6.2202	5.6032	4.404	0.7321	4.1094	5.8092	5.4676	3.8561	4.3646	5.6611	6.3205	5.837	3.0287	5.6235	4.5802	4.5386	-9.9658	9.5997	9.0638	5.0523	5.4456	4.9146
GBMLGG	Tumor	TCGA-DB-A4XF-01	5.6843	4.2181	3.2251	2.7972	3.2127	5.1252	4.9031	4.2495	5.6433	3.1939	4.3632	3.8239	4.4751	2.5561	3.3675	2.0979	3.6646	-2.5479	4.6866	1.4441	2.1013	-0.8863	2.8381	6.3018	5.1227	4.1011	1.6234	3.9223	5.7118	4.5964	3.8167	4.1094	5.4774	6.3875	5.6433	3.2205	5.1252	4.9031	4.2495	-9.9658	8.8527	8.7234	4.4919	4.9737	4.916
GBMLGG	Tumor	TCGA-FG-A713-01	4.91692	3.5009	3.2781	3.1653	3.5875	4.6843	4.3883	3.5411	5.2079	1.9452	4.1555	3.5486	4.6456	1.4228	3.0498	4.0532	3.0706	-2.7274	4.6747	0.4761	2.5188	-1.3921	0.9862	5.6014	4.0807	2.6533	0.7493	3.4102	5.0571	4.1343	3.6359	4.3562	5.839	6.0317	5.2079	2.7095	4.6843	4.3883	3.5411	-9.9658	8.5869	8.2135	4.4803	5.0059	4.1652
GBMLGG	Tumor	TCGA-E1-A7YL-01	6.79702	3.4331	3.836	3.2174	3.927	5.6946	4.8007	3.8461	4.9444	2.8701	4.6955	4.7762	5.0471	1.9264	3.3119	5.0171	3.2752	2.5487	5.8563	0.9343	2.9432	0.7999	2.1638	6.3942	4.7788	3.2049	1.1382	3.1458	6.5078	4.864	3.4318	2.7826	5.9784	5.3107	4.9444	2.9052	5.6946	4.8007	3.8461	-9.9658	9.5224	8.3832	3.9147	5.5659	5.439
GBMLGG	Tumor	TCGA-CS-5396-01	6.2778	4.2654	3.7825	3.9289	3.0092	5.0807	4.8535	5.1827	5.6361	3.4102	4.8253	4.0515	4.905	3.091	3.0463	3.6939	2.872	-3.458	5.0108	1.6374	2.496	-0.4921	2.9507	5.8138	4.9199	4.9227	1.6512	4.14	5.9069	4.38	4.811	5.2803	5.72	6.6222	5.6361	2.8936	5.0807	4.8535	5.1827	-9.9658	9.2213	9.1755	5.0592	5.4337	5.4967
GBMLGG	Tumor	TCGA-HW-8322-01	6.90508	4.306	4.7908	3.417	3.6543	5.407	4.6983	4.7132	5.9755	3.3119	5.1664	5.0396	5.4006	3.1939	3.2988	4.6798	4.2001	-3.816	5.7374	2.3135	2.9929	0.3115	3.7982	6.2311	5.779	4.6294	1.2271	4.8279	6.0137	4.7523	5.0605	5.0427	5.5494	6.4858	5.9755	3.8925	5.407	4.6983	4.7132	-9.9658	9.6102	9.0225	5.2773	5.7431	5.0206
GBMLGG	Tumor	TCGA-S9-A6U9-01	6.21119	3.5224	3.0568	2.6918	3.6759	4.9016	4.5028	3.9719	5.7282	3.1079	4.2343	4.1506	4.6583	1.5064	3.2511	3.2112	3.2826	-1.5951	4.4726	1.4011	2.6805	-1.4305	1.8201	6.0713	5.0339	2.9784	1.1897	3.7335	5.7743	4.9851	3.5815	4.2227	5.5267	5.7597	5.7282	2.651	4.9016	4.5028	3.9719	-9.9658	9.2288	8.9271	4.314	4.3786	4.905
GBMLGG	Tumor	TCGA-HT-7676-01	5.67577	4.3285	3.5851	2.7051	3.5324	4.7783	5.2958	4.2518	5.4256	3.0927	4.5547	3.8866	4.466	2.1476	3.1781	3.1228	3.3003	-1.685	4.2142	0.7832	2.3732	-1.6394	2.3953	6.1231	4.4686	3.6916	1.2333	4.0645	5.9823	4.8084	3.1955	3.944	4.9251	5.6247	5.4256	2.3048	4.7783	5.2958	4.2518	-9.9658	9.1069	9.1985	4.443	4.7285	4.5946
GBMLGG	Tumor	TCGA-HT-7469-01	7.1913	3.8886	4.538	3.83	4.3611	5.49	5.8475	5.1144	6.5368	3.7345	5.3056	5.5129	5.4101	2.0742	4.0841	3.6657	4.8475	0.9642	5.6871	3.1393	3.7171	2.0218	3.154	6.8928	6.0794	4.6623	2.7931	3.9636	7.3921	5.3541	4.764	4.3031	5.9098	5.6035	6.5368	3.6861	5.49	5.8475	5.1144	-9.9658	10.0164	9.7104	5.4935	5.0041	5.6401
GBMLGG	Tumor	TCGA-32-2634-01	7.30325	4.6882	4.7945	4.9594	3.9137	5.779	5.5252	4.7898	5.5261	2.8381	4.8329	5.0781	5.0068	2.7721	3.8739	5.0273	2.824	2.118	6.3479	1.7185	3.7752	2.0218	2.3164	7.4762	4.3979	4.3548	2.5388	4.6815	6.7987	5.1514	4.2111	3.2707	5.6753	6.2561	5.5261	3.2158	5.779	5.5252	4.7898	0.2154	9.4998	9.1322	4.9199	5.4922	5.7661
GBMLGG	Tumor	TCGA-HT-7478-01	5.57466	4.4764	3.7898	3.0163	2.909	4.9782	5.0484	4.1351	5.3796	3.2707	4.5186	4.6983	4.5349	2.4412	3.4398	3.8023	2.8858	-1.9942	4.0601	1.1117	2.5924	-1.2142	2.296	5.8136	4.562	3.7773	1.5013	3.2359	6.1785	4.2126	3.6566	4.2571	5.5037	6.5839	5.3796	2.9637	4.9782	5.0484	4.1351	-9.9658	9.0489	8.896	4.0269	4.7887	4.8274
GBMLGG	Tumor	TCGA-DU-A5TW-01	6.25282	3.9974	4.3392	3.6101	3.7699	5.0063	5.0614	4.6095	5.4838	3.1261	4.6697	5.4647	5.0148	1.5514	3.417	2.3106	4.562	-1.8836	5.204	2.0946	2.4701	0.1388	2.4597	6.3658	6.3995	3.0637	1.0573	3.9251	5.7911	5.6171	4.3992	3.835	5.3147	5.7549	5.4838	3.0774	5.0063	5.0614	4.6095	-9.9658	9.944	8.9042	4.3198	4.9824	4.8768
GBMLGG	Tumor	TCGA-S9-A6TX-01	5.79627	3.623	3.1409	2.7572	3.3506	4.8798	3.6657	3.3842	5.4944	2.8014	4.149	4.1684	4.957	2.0325	2.4306	4.4364	4.0348	-3.816	5.0135	0.4233	2.5288	-1.1811	1.766	6.0573	4.9275	3.2841	0.5069	3.4556	5.0592	4.9199	3.5187	3.7635	5.381	5.4353	5.4944	2.6441	4.8798	3.6657	3.3842	-9.9658	9.0569	9.0023	4.3681	5.0657	4.3278
GBMLGG	Tumor	TCGA-RY-A83Z-01	6.09189	4.2943	4.2803	3.074	3.8147	5.3067	5.2095	3.3633	5.2377	2.59	4.5982	5.0175	4.2472	1.8918	2.8158	2.2206	3.3105	-1.9379	5.4256	-0.1187	2.9948	-0.3383	1.4652	7.886	5.3688	2.3732	1.7185	4.215	5.9129	6.0577	2.9032	2.4649	5.7214	4.8585	5.2377	2.1378	5.3067	5.2095	3.3633	-6.5064	9.3068	9.2929	4.1474	5.6491	4.6994
GBMLGG	Tumor	TCGA-06-0141-01	5.47703	4.5687	3.7193	2.7805	2.236	4.6747	4.8905	3.9746	4.1186	2.5238	4.7356	3.7421	4.5117	2.1444	3.0287	4.1136	2.0183	0.9268	4.6218	0.7146	2.2753	-0.7588	1.2085	5.6554	4.5311	2.5561	0.3796	2.9071	6.7844	4.8243	2.8819	2.3337	5.1506	4.7893	4.1186	2.8341	4.6747	4.8905	3.9746	-2.6349	8.52	7.93	3.6125	5.3306	4.7165
GBMLGG	Tumor	TCGA-06-0125-01	7.47224	4.4257	3.9856	4.3992	3.8788	5.9964	5.7082	4.7965	5.3705	3.449	4.7934	5.5835	5.235	2.7379	3.9838	4.5028	4.1294	2.0673	6.6026	2.0569	3.907	0.8883	2.5313	6.7624	5.9837	3.4331	1.5709	4.5104	7.1258	5.1119	4.6047	3.9719	5.9277	6.3662	5.3705	3.6018	5.9964	5.7082	4.7965	-4.2934	9.9354	9.0455	4.5085	5.4162	6.2298
GBMLGG	Tumor	TCGA-FG-A6IZ-01	5.89532	4.3285	4.1441	2.8381	4.4977	4.7986	3.8198	3.1781	4.2951	2.7117	5.8897	3.6849	4.4496	1.816	1.7446	2.1147	2.8877	-4.035	5.1635	-0.2498	0.8568	-2.7274	0.7058	6.9519	4.1604	1.6466	0.3685	3.3591	5.3848	5.5154	2.651	1.7316	5.1962	4.1571	4.2951	0.9642	4.7986	3.8198	3.1781	-9.9658	8.3026	8.8856	3.981	5.5506	3.9041
GBMLGG	Tumor	TCGA-CS-4941-01	6.80951	4.2095	3.8818	3.6543	3.3911	5.445	5.7019	4.4536	5.36	2.5658	4.7517	4.6439	4.9298	2.3164	4.2048	5.0189	2.7636	1.816	4.9533	1.5216	3.5875	-0.8863	2.167	6.1916	4.4529	4.402	2.2299	4.6554	6.0909	4.9079	4.7804	4.6006	6.4214	6.2231	5.36	2.9802	5.445	5.7019	4.4536	-9.9658	9.4173	8.966	4.8684	5.2017	5.5964
GBMLGG	Tumor	TCGA-DH-A7UT-01	5.72707	3.4635	3.6578	2.5948	3.9663	4.905	4.6312	3.7486	5.2392	2.5238	3.906	4.6023	4.7115	2.167	2.7029	4.0807	3.4661	-1.3548	4.4324	1.0363	2.8641	-0.6643	1.8564	5.8182	5.7288	2.9929	0.7579	3.6793	5.5245	5.3968	3.1458	3.335	5.2851	5.5937	5.2392	2.6962	4.905	4.6312	3.7486	-9.9658	9.2621	8.4572	4.0994	4.906	4.3992
GBMLGG	Tumor	TCGA-DU-5871-01	6.18367	4.0722	3.0961	3.4451	3.5362	4.8871	5.0816	4.8228	5.7701	2.8994	4.2204	4.5268	4.6422	1.9073	3.3925	4.041	3.5387	-2.3884	4.5687	1.5366	2.2723	-1.0262	2.5288	5.8354	4.8084	3.4277	2.0004	4.0383	5.8314	5.0197	4.001	4.281	5.5333	6.3318	5.7701	2.5413	4.8871	5.0816	4.8228	-9.9658	8.9646	9.0472	4.2758	4.8675	5.0466
GBMLGG	Tumor	TCGA-HW-8321-01	6.02589	3.8116	4.0118	3.1971	3.6691	4.9113	5.1293	4.597	5.5856	3.2856	4.4357	4.441	4.842	2.7161	3.6312	4.1011	4.677	-1.5951	4.8665	2.036	2.4171	-0.7588	3.1028	5.0317	5.3664	3.9421	1.9786	3.9384	6.1202	4.1571	4.3119	4.2766	5.3502	6.1932	5.5856	3.4102	4.9113	5.1293	4.597	-9.9658	9.1508	8.9764	2.5238	5.1788	5.073
GBMLGG	Tumor	TCGA-EZ-7264-01	6.65646	4.4156	4.6508	3.8788	2.8838	5.5814	4.6212	5.0242	5.6369	2.3564	4.9746	5.0743	5.3664	3.0944	3.2557	5.1704	4.096	-1.8836	5.6203	2.5087	2.5561	0.2522	2.7465	6.1148	5.66	4.0688	1.4065	4.3653	5.7637	4.7955	4.6428	5.3299	5.585	6.5509	5.6369	4.1069	5.5814	4.6212	5.0242	-9.9658	9.672	9.0771	5.2468	5.7738	4.8748
GBMLGG	Tumor	TCGA-CS-6666-01	6.64606	4.3737	3.0376	3.506	3.5815	4.9764	5.427	4.8861	5.5176	3.0876	3.958	4.7783	5.3377	2.0776	4.182	1.5514	4.0909	-3.3076	4.9444	2.5828	2.6208	-0.2845	2.6579	6.7355	5.1942	4.2533	1.9895	3.9746	5.7504	5.9693	3.7982	4.327	5.5705	6.3796	5.5176	2.2633	4.9764	5.427	4.8861	-9.9658	9.0917	9.349	4.2196	5.2415	5.5976
GBMLGG	Tumor	TCGA-HW-7491-01	6.02727	4.3841	4.0506	3.8218	2.9875	5.4884	4.4951	5.1887	5.4023	3.2959	4.6071	4.4751	4.7496	2.8076	3.2617	3.9194	3.7518	-3.6259	5.5928	2.043	3.1095	-0.5125	2.8819	5.8716	4.9547	4.0357	1.7744	3.9478	5.4233	4.4122	4.8846	4.3499	5.6545	6.7068	5.4023	3.4371	5.4884	4.4951	5.1887	-9.9658	9.2734	9.3662	5.5976	5.9284	5.2806
GBMLGG	Tumor	TCGA-S9-A6U1-01	6.44	4.3681	4.1915	3.2929	3.4868	5.4226	5.5756	4.6077	5.975	3.2359	4.1644	4.3855	5.4887	2.876	3.8769	3.6861	3.8421	-1.5951	5.4793	1.5165	3.3478	0.1388	3.3703	6.6528	5.4296	4.3292	2.0673	4.6177	6.0451	5.1482	4.0304	4.4906	5.625	6.2621	5.975	3.3163	5.4226	5.5756	4.6077	-9.9658	9.5568	9.3059	5.1708	5.2597	5.302
GBMLGG	Tumor	TCGA-E1-5307-01	6.26269	4.4881	4.0816	3.3966	3.2267	5.0392	5.5747	4.9397	6.0018	3.4007	4.2751	3.9515	4.5766	3.0706	3.8759	2.3308	3.6113	-2.4659	4.7323	1.2394	2.3592	-0.7346	3.4609	5.963	4.7698	4.7856	2.3536	4.3569	5.7442	5.0357	4.6399	4.4983	5.645	6.6809	6.0018	2.4883	5.0392	5.5747	4.9397	-9.9658	9.1925	9.5022	4.652	5.0335	5.2377
GBMLGG	Tumor	TCGA-DU-A76L-01	6.7665	4.5516	4.3321	4.4324	3.9108	5.8761	5.8585	4.7253	5.7568	2.9875	5.0514	5.0592	5.2858	2.9071	3.8279	4.4344	2.872	0.9493	5.4416	1.6604	3.3717	0.4016	2.3251	6.4808	4.6059	4.3321	2.1013	4.3097	6.7275	5.1073	4.3992	4.8059	6.3399	5.88	5.7568	3.5224	5.8761	5.8585	4.7253	-2.114	10.0167	8.923	4.6224	5.1835	5.2958
GBMLGG	Tumor	TCGA-HW-7495-01	5.72952	4.1318	3.865	3.1971	3.9318	5.1696	4.5249	4.4135	5.6422	3.055	4.9036	4.0366	4.838	2.4306	3.5971	4.5047	3.6771	-2.3884	4.5602	1.5366	2.8321	-0.9971	2.7401	5.9345	5.2211	4.3342	1.7702	3.9374	5.7536	4.6474	4.4128	4.5952	5.6273	6.5189	5.6422	3.2511	5.1696	4.5249	4.4135	-9.9658	9.0931	8.7154	4.9289	5.3562	4.8197
GBMLGG	Tumor	TCGA-CS-6669-01	3.69713	3.8778	2.5972	3.0842	3.1939	4.2088	4.7913	3.7237	4.6554	1.9188	3.9099	3.074	3.7919	1.7229	3.1112	3.5815	2.6208	-2.5479	3.5923	0.7579	2.0979	-2.3147	0.9191	4.7291	3.8249	2.8422	0.7916	3.2205	5.2327	3.834	3.3163	4.17	5.8082	6.3142	4.6554	2.7805	4.2088	4.7913	3.7237	-9.9658	7.923	7.8079	4.4913	5.1831	4.0892
GBMLGG	Tumor	TCGA-HT-7481-01	5.41821	4.3513	3.9108	3.4048	3.3119	5.0423	4.7345	4.3234	5.6139	2.7422	4.6077	3.8788	4.5826	2.6278	2.9507	3.1261	3.4183	-1.7809	4.7861	1.4335	2.3222	-0.8863	2.7161	6.0728	4.5808	4.0419	1.1512	3.8023	5.6041	4.5994	3.906	4.6422	5.6562	6.1813	5.6139	2.9375	5.0423	4.7345	4.3234	-9.9658	9.0398	8.6858	4.7458	5.4303	4.5299
GBMLGG	Tumor	TCGA-DU-8163-01	6.19846	4.0653	4.3681	3.1129	3.3842	5.0545	5.3512	4.641	5.714	3.1377	4.067	4.6566	4.8876	2.6738	3.8269	3.4945	3.4674	-2.4659	5.018	1.7053	3.0706	-0.3201	3.2251	5.8197	5.4023	4.2472	2.0638	4.061	5.9996	4.3477	4.5964	4.7253	5.3176	6.1396	5.714	3.3869	5.0545	5.3512	4.641	-9.9658	9.483	9.0504	4.7377	5.0392	5.1061
GBMLGG	Tumor	TCGA-26-1442-01	5.25251	3.8279	3.6827	3.0199	3.4451	4.9704	4.7274	3.83	4.9607	2.6984	3.8591	5.9713	5.1211	1.9749	3.0411	2.4883	3.9645	-3.3076	4.6148	1.4704	2.1925	-0.2845	1.8918	5.4067	5.3989	2.7205	0.8488	3.29	5.738	4.6142	3.4034	3.7825	4.6312	5.7041	4.9607	2.8117	4.9704	4.7274	3.83	-9.9658	8.9606	8.7397	4.4095	5.0215	4.7383
GBMLGG	Tumor	TCGA-HT-8110-01	6.40768	3.6816	4.5466	3.345	3.242	5.1469	4.9892	4.3213	4.9828	2.5238	4.6329	4.3234	4.6183	2.3451	3.652	4.7501	2.7721	1.3454	4.7453	1.4174	3.0481	-0.5543	2.1411	5.9468	4.4081	3.5791	1.2209	3.6703	6.1012	4.287	3.9765	4.298	5.3445	6.1685	4.9828	3.1813	5.1469	4.9892	4.3213	-6.5064	9.356	8.3706	4.4945	4.9426	5.3817
GBMLGG	Tumor	TCGA-RY-A840-01	5.76682	4.4324	4.4115	3.2988	2.4359	5.4568	4.0901	3.8729	5.1073	2.081	4.796	4.3097	5.1006	1.6234	1.9264	3.6195	4.2472	-3.0469	5.1583	0.5271	2.0465	-1.4305	2.3981	7.3032	4.6381	3.2328	0.6239	3.991	5.5401	5.1077	3.492	3.4224	5.3937	5.8914	5.1073	2.3953	5.4568	4.0901	3.8729	-9.9658	9.1357	8.4619	4.3428	5.505	4.2056
GBMLGG	Tumor	TCGA-VM-A8C9-01	5.37154	3.417	3.1572	1.7954	3.7635	4.9222	4.3569	2.6579	4.0462	1.9111	4.9801	3.0654	3.9561	0.7579	1.7229	4.8963	1.0983	-2.9324	4.4964	-0.5543	1.7446	-2.3884	-0.0574	6.4478	3.7635	1.5064	1.0007	3.074	5.1676	5.3284	2.0604	1.6466	5.3488	4.4906	4.0462	0.7664	4.9222	4.3569	2.6579	-9.9658	8.3219	8.612	3.1523	4.2088	4.2624
GBMLGG	Tumor	TCGA-HW-8319-01	6.14383	4.2488	3.9099	3.0757	3.5694	5.3317	5.4562	4.6697	6.0032	3.2096	3.8075	4.5711	4.576	2.982	3.8886	4.1136	4.0619	-1.4699	5.1668	2.2901	3.2282	-0.1828	3.4183	5.9074	5.7504	4.1986	2.2113	4.222	5.9021	4.3896	4.4771	4.7756	5.5814	6.6658	6.0032	3.5174	5.3317	5.4562	4.6697	-6.5064	9.4379	9.1286	5.2358	5.1954	5.3126
GBMLGG	Tumor	TCGA-HT-7482-01	5.88431	4.2684	3.8451	3.0978	3.3221	4.867	5.2483	4.7597	5.8082	3.1813	4.4816	4.0653	4.6508	1.9895	3.3206	3.7741	3.9746	-1.9942	4.0242	1.8564	2.3843	-1.5522	2.3019	5.7455	4.8555	3.7571	1.5013	3.3003	5.7848	5.4745	3.6816	3.794	5.5457	6.1031	5.8082	2.8402	4.867	5.2483	4.7597	-9.9658	9.1591	9.2477	4.5608	4.7793	5.0449
GBMLGG	Tumor	TCGA-QH-A6CW-01	6.50239	3.6006	3.2781	2.5511	3.8915	5.3338	5.0335	3.907	5.9975	3.0706	4.7458	4.4777	4.722	1.9786	2.9784	3.7204	3.9412	-2.114	5.0444	0.9191	2.5462	-0.5973	2.3193	6.4867	5.4033	2.96	1.4704	4.1417	5.8914	5.8973	3.5971	4.1219	5.9019	6.0222	5.9975	2.7227	5.3338	5.0335	3.907	-9.9658	9.4213	9.0835	4.4027	4.8758	4.891
GBMLGG	Tumor	TCGA-DU-5870-01	5.83418	4.4996	4.1506	3.2572	3.6136	5.3402	4.3744	4.3999	5.498	2.8819	4.7214	4.0046	4.859	1.949	2.9128	4.6697	3.9431	-3.3076	4.5436	0.9268	2.8897	-0.8599	2.7679	6.1117	4.7431	4.0918	1.2085	4.0722	5.6404	4.3148	3.9663	4.5898	5.365	6.3178	5.498	2.6556	5.3402	4.3744	4.3999	-9.9658	8.9667	8.8875	4.7965	5.5717	5.018
GBMLGG	Tumor	TCGA-TM-A84S-01	5.73796	4.034	3.8896	2.8542	3.7582	5.2044	4.222	3.9819	5.4764	2.7657	4.5053	4.1145	4.4397	1.8996	2.578	4.3917	3.6894	-3.458	4.5192	0.9115	2.5536	-0.3752	2.4544	6.0442	4.9251	3.6042	0.8726	3.7475	5.5629	4.9855	3.4048	3.2143	5.5024	6.0104	5.4764	2.5137	5.2044	4.222	3.9819	-9.9658	9.1733	8.7738	4.7138	5.0981	4.9773
GBMLGG	Tumor	TCGA-26-5136-01	6.48894	4.7751	4.5946	3.4868	3.6623	5.2943	5.4938	4.0348	5.2702	3.2707	4.5559	4.429	5.6171	2.2543	3.2885	4.9603	2.7444	0.1648	5.709	1.6374	3.0163	0.1903	1.8918	6.4104	5.3782	3.6066	2.0776	3.9608	6.6047	6.0097	4.0436	3.6612	5.8912	5.1974	5.2702	2.8219	5.2943	5.4938	4.0348	-5.0116	10.1214	9.6716	5.0009	6.0438	5.5314
GBMLGG	Tumor	TCGA-14-1034-01	7.35801	4.3889	3.8551	3.3293	3.5947	5.3223	6.1065	4.3104	5.314	3.4183	4.7512	3.9974	4.8304	2.6556	4.0952	4.696	1.8957	0.8246	5.988	1.0079	2.5137	-1.2828	1.7053	6.9405	4.3342	4.2196	1.6695	4.1466	7.301	4.447	4.3392	3.0842	6.4817	5.9727	5.314	2.0569	5.3223	6.1065	4.3104	-4.6082	9.4826	9.107	4.3618	5.2138	6.0279
GBMLGG	Tumor	TCGA-06-0184-01	6.45878	4.2631	3.865	3.0163	3.2205	4.9313	5.1938	4.1343	4.3758	3.2143	4.0722	4.7997	4.5657	2.2723	3.623	3.7699	1.614	0.24	4.9069	0.7916	3.0757	-1.3921	1.1706	5.7364	4.5205	2.8974	0.9716	3.4907	6.3356	4.8905	3.7518	2.1925	5.63	5.0479	4.3758	2.0878	4.9313	5.1938	4.1343	-9.9658	8.6026	8.8585	3.5374	4.7587	5.1977
GBMLGG	Tumor	TCGA-12-3652-01	5.93004	4.4317	3.9874	3.1987	3.3163	4.6101	4.6742	4.2457	3.7709	3.1604	3.7116	3.2856	2.296	1.9452	3.3897	4.1335	1.5165	1.5366	4.3242	1.2085	2.2144	-0.7588	1.0151	6.8596	4.523	2.233	0.9568	2.5238	6.6135	3.9819	2.609	1.125	5.4463	4.855	3.7709	1.8564	4.6101	4.6742	4.2457	-9.9658	8.3222	9.5718	3.8147	4.8279	5.014
GBMLGG	Tumor	TCGA-RY-A845-01	5.81837	4.0918	4.1539	3.0568	3.7389	5.3622	5.1784	4.3292	5.7209	3.3379	4.9677	4.4257	4.8435	2.7679	3.1653	3.4569	3.9147	-3.1714	4.9232	1.7995	2.8522	-0.1504	3.0602	6.0195	5.5223	3.9261	1.5661	4.2578	6.1212	5.2483	4.2289	4.2631	5.5753	6.3402	5.7209	2.8819	5.3622	5.1784	4.3292	-9.9658	9.705	9.0806	4.8605	5.2858	4.9141
GBMLGG	Tumor	TCGA-76-4927-01	7.20808	4.2758	4.4977	3.2856	3.906	5.373	5.5072	4.2825	4.9482	3.3897	5.0148	4.5349	4.9199	1.884	3.7039	5.0295	1.3397	1.884	5.842	1.4808	3.2405	-0.6416	1.6327	6.8407	4.9055	3.417	1.3623	4.3786	6.5919	5.1111	4.182	3.7324	5.6982	5.6473	4.9482	2.1411	5.373	5.5072	4.2825	-2.1779	9.6423	9.2632	4.0593	4.6685	5.6696
GBMLGG	Tumor	TCGA-FG-8182-01	6.3561	3.9892	4.1153	3.1212	3.5875	5.1883	5.4764	4.7474	6.0422	3.3966	4.3744	4.8963	4.8309	2.5852	3.9956	3.5124	4.2914	-1.0862	5.1478	1.8722	3.2481	-0.3022	3.8541	5.8515	5.7687	4.1836	2.3308	4.2134	6.0494	4.5085	4.468	4.8192	5.7594	6.2961	6.0422	3.644	5.1883	5.4764	4.7474	-9.9658	9.5846	9.0486	5.0166	5.1792	5.2499
GBMLGG	Tumor	TCGA-14-0790-01	7.12913	4.6201	4.3477	3.5645	3.9682	5.0601	5.433	4.6793	5.2118	3.2632	4.1986	5.2713	4.6329	3.0515	3.5073	4.9199	2.3953	2.3423	5.7767	1.105	2.8799	0.5859	2.167	6.4619	5.5528	3.074	1.0007	3.4765	6.2398	4.9681	4.0109	3.7741	5.5348	5.7816	5.2118	2.6348	5.0601	5.433	4.6793	-2.6349	9.5465	9.3998	4.4203	5.7832	5.9084
GBMLGG	Tumor	TCGA-26-5132-01	7.17918	4.2766	3.2915	3.3717	4.0471	5.4002	5.4443	4.2488	5.2563	3.4543	5.0299	4.0867	5.1359	2.3953	4.1302	5.3961	1.3397	2.0844	6.8551	1.7489	2.376	0.058	1.5902	7.5212	5.1355	3.492	2.1541	4.1343	7.4187	5.4996	4.7236	2.8219	6.4041	5.9009	5.2563	2.5924	5.4002	5.4443	4.2488	-6.5064	9.7233	9.3005	4.7242	5.5555	6.1461
GBMLGG	Tumor	TCGA-FG-6688-01	6.34445	3.6042	3.8136	3.2034	3.8136	5.6725	4.9718	3.7421	5.2242	3.1556	4.9227	3.8769	4.6566	2.0395	3.0791	4.5236	2.59	1.3567	4.441	1.4065	2.2693	-1.5105	1.6964	5.9892	4.5626	3.7006	1.4388	3.5022	6.0186	4.8043	3.623	3.6301	5.8677	6.0968	5.2242	2.5437	5.6725	4.9718	3.7421	-6.5064	9.1412	8.6635	4.2691	5.0197	5.2464
GBMLGG	Tumor	TCGA-TQ-A7RP-01	6.21454	3.4868	3.2692	2.7784	4.1844	5.3855	4.8425	3.7909	4.9865	2.7679	4.5286	4.3862	4.466	2.0673	3.0515	4.1252	2.2452	-1.2828	4.6713	0.9935	2.5536	-1.4305	1.5854	5.6823	4.6479	3.2143	0.7058	3.3435	5.9957	4.5748	3.3421	4.3924	5.5239	5.7589	4.9865	2.1894	5.3855	4.8425	3.7909	-9.9658	9.0709	8.2554	4.597	5.0816	5.0108
GBMLGG	Tumor	TCGA-HT-8113-01	4.44828	4.1392	3.6961	3.1588	3.4933	4.686	4.9603	4.0506	5.1756	2.4279	4.4216	3.7846	4.7296	2.004	3.4048	4.1011	3.2915	-2.7274	4.0739	0.7233	2.3536	-0.9406	1.4808	5.0747	4.591	3.186	0.8726	3.3393	5.5503	3.8818	3.5212	4.3306	5.8985	6.603	5.1756	3.154	4.686	4.9603	4.0506	-9.9658	8.5051	8.1332	4.86	5.445	4.0144
GBMLGG	Tumor	TCGA-76-4932-01	6.86234	4.5699	4.47	3.208	3.9801	5.3158	4.7307	4.3263	5.1631	3.3633	4.449	4.7528	4.7148	1.9822	4.0884	4.443	1.683	0.1776	5.44	0.605	4.0019	-0.1504	1.7141	6.963	5.225	2.8701	1.7532	4.2017	6.9947	5.0631	3.864	3.5779	6.0586	5.6619	5.1631	2.1345	5.3158	4.7307	4.3263	-5.0116	9.6622	9.7013	3.9543	5.2184	5.8493
GBMLGG	Tumor	TCGA-HT-7689-01	5.81709	4.2126	4.0251	3.325	3.2856	5.2586	5.2342	4.208	5.7911	2.3649	4.734	4.4033	4.6399	2.5828	3.8431	3.1685	3.864	-2.1779	4.6617	1.4704	2.8622	-0.7588	2.6984	6.0219	5.6375	3.7061	1.7617	4.1571	5.8258	4.8689	3.9318	3.9974	5.6696	6.7862	5.7911	3.2929	5.2586	5.2342	4.208	-2.5479	9.5	9.2579	4.6456	5.0905	4.9978
GBMLGG	Tumor	TCGA-FG-7638-01	5.46403	4.0558	3.3883	2.826	3.5086	4.795	4.1555	3.8769	4.9594	2.5087	4.5136	3.6417	4.1359	1.7229	2.2268	4.0705	3.1749	-2.3147	4.0445	0.8488	2.0638	-0.8339	1.8643	5.7388	4.3249	3.0358	0.24	3.3393	5.2208	4.5802	3.5047	3.8954	5.3442	5.9293	4.9594	1.9931	4.795	4.1555	3.8769	-9.9658	8.7882	8.61	4.49	4.9289	4.7165
GBMLGG	Tumor	TCGA-DU-7013-01	7.34678	4.7093	4.3855	3.7215	4.2472	5.4296	5.4327	5.5886	6.0321	3.6066	4.7394	4.728	5.0321	3.4622	4.2616	4.5154	3.1045	2.3843	5.6311	1.7141	4.2884	0.6969	3.3856	6.9649	5.6177	4.8375	2.496	4.554	6.5209	5.1127	5.5113	5.0721	6.0555	6.5322	6.0321	3.3017	5.4296	5.4327	5.5886	-9.9658	10.1784	9.4765	5.0734	5.1672	5.8573
GBMLGG	Tumor	TCGA-32-1970-01	7.28974	4.1136	4.4509	3.4958	4.1261	5.3395	5.5286	4.3772	5.429	3.0774	4.9041	5.026	4.7049	2.1541	4.096	5.4323	3.0056	2.1345	6.2865	1.2576	3.8531	-0.1187	2.0569	6.7736	5.4091	3.6184	1.7912	4.096	6.5498	5.0769	4.5442	3.1311	5.7334	5.8975	5.429	2.6895	5.3395	5.5286	4.3772	-6.5064	9.9338	8.93	4.6422	5.3569	5.8632
GBMLGG	Tumor	TCGA-E1-A7Z3-01	5.39096	3.7149	3.4251	2.7095	3.4609	4.8038	4.8074	3.8808	4.9773	2.6533	3.8808	3.9856	4.3632	1.816	3.1523	3.6101	3.0842	-2.9324	4.5002	0.5568	2.5163	-0.5332	1.9859	5.3345	4.7581	2.6828	0.9038	3.3421	5.6539	4.499	3.4237	3.4583	5.8136	5.7735	4.9773	2.609	4.8038	4.8074	3.8808	-9.9658	8.4961	8.5052	4.2803	4.9896	4.4836
GBMLGG	Tumor	TCGA-HT-7476-01	5.35583	3.9403	3.449	2.8838	2.9948	4.2736	4.7997	3.9384	4.8248	2.4985	4.1211	3.6509	4.2258	1.5902	2.7763	3.3717	2.9893	-3.6259	3.7443	1.2394	2.1013	-1.5105	1.8444	5.8824	4.0445	2.8819	0.7664	3.38	5.658	4.5355	3.0305	3.4739	5.2009	5.426	4.8248	2.3222	4.2736	4.7997	3.9384	-9.9658	8.5138	8.621	4.131	4.9275	4.445
GBMLGG	Tumor	TCGA-TQ-A7RG-01	6.23575	4.3876	4.327	3.1733	3.6725	5.5856	4.506	4.5211	5.8118	3.4517	3.9561	4.6	5.0679	2.6278	2.5238	4.287	4.0207	-2.0529	4.9227	1.8604	3.0671	-0.1828	3.1393	6.1809	5.4303	4.0943	1.2023	4.0593	5.8523	5.1623	3.834	4.4958	5.5787	6.2994	5.8118	3.3264	5.5856	4.506	4.5211	-9.9658	9.4792	8.9983	4.9741	5.391	5.2559
GBMLGG	Tumor	TCGA-FG-8181-01	4.38194	4.1668	3.5149	3.2297	3.3787	4.756	5.1599	3.9983	4.9649	2.3164	4.4602	3.5694	4.1595	1.5316	3.0217	3.8964	2.7029	-2.3147	3.9089	0.7999	2.328	-1.4305	0.7999	5.2702	4.0019	2.8936	1.3454	3.3163	5.6262	4.0055	3.5022	4.1595	5.9746	6.3738	4.9649	3.2359	4.756	5.1599	3.9983	-9.9658	8.5421	8.1131	4.7608	5.2518	4.0841
GBMLGG	Tumor	TCGA-DU-A7T6-01	6.38564	4.6018	4.0462	3.9626	3.6669	5.0764	4.8028	4.1011	5.4132	2.6602	4.6253	4.4536	4.8141	1.9786	3.0145	5.3274	3.5287	-3.3076	5.748	1.5216	2.1047	0.3796	2.1894	6.8774	5.1065	3.2572	0.7493	4.1844	5.3086	5.1708	3.3787	3.8105	5.6183	6.082	5.4132	2.296	5.0764	4.8028	4.1011	-9.9658	9.486	8.9696	4.7176	5.5367	5.3657
GBMLGG	Tumor	TCGA-DB-A4XC-01	6.22559	4.1061	3.5073	2.9148	3.7367	5.445	5.1938	4.466	5.8289	3.5124	4.4719	5.2032	4.844	2.4252	3.4933	3.7356	4.1359	-0.0425	5.131	1.3735	3.0481	-0.4719	2.9032	5.8716	5.393	4.0943	1.4911	4.1417	6.3291	4.5367	4.0679	4.2958	5.6165	6.2134	5.8289	3.5237	5.445	5.1938	4.466	-9.9658	9.1671	8.7223	4.9964	4.9741	4.9924
GBMLGG	Tumor	TCGA-FG-A4MW-01	6.75065	3.7182	3.5073	2.8681	3.7877	5.1997	4.8992	3.7324	4.8136	2.496	4.2884	4.3723	4.149	2.0604	3.0358	4.1277	2.3843	1.3283	5.5904	0.5859	3.0602	-0.2159	1.5165	6.1918	5.1073	2.6715	0.9038	3.6543	5.9869	4.7132	3.242	3.4437	5.3954	5.3031	4.8136	2.496	5.1997	4.8992	3.7324	-9.9658	9.3057	8.604	3.8983	4.6554	5.2873
GBMLGG	Tumor	TCGA-06-0219-01	4.94438	4.7945	3.4971	2.7487	1.4962	3.9617	4.7555	3.7105	3.2856	2.5462	4.7388	2.8562	3.1987	2.362	3.1556	3.1717	0.9038	0.4552	3.9175	1.0363	1.4228	-1.8314	0.2029	6.1815	3.8491	1.1382	0.058	1.8078	7.6133	4.1219	2.3366	0.9419	4.1852	3.8157	3.2856	1.5115	3.9617	4.7555	3.7105	-6.5064	6.8813	8.8928	2.9432	4.6645	4.0488
GBMLGG	Tumor	TCGA-DH-5142-01	6.70379	4.3758	3.5009	3.5399	3.2282	5.2342	5.4598	4.2001	5.682	2.8482	4.5167	4.6294	4.756	2.4985	3.5923	4.0816	3.0411	-2.6349	5.2736	1.6875	2.7249	-0.2159	2.7422	6.5037	4.7033	4.2041	1.8119	4.3449	6.1046	5.1526	3.8719	3.6782	5.8151	6.3676	5.682	2.8858	5.2342	5.4598	4.2001	-9.9658	9.1427	9.2414	3.8983	4.8161	5.4588
GBMLGG	Tumor	TCGA-14-0787-01	6.91698	4.4758	4.9846	3.6417	4.1676	5.6674	5.3726	4.0884	4.891	3.5584	5.1359	4.9805	5.1211	1.8643	3.1797	4.4463	2.2513	1.2271	5.8929	1.0573	3.421	0.346	1.2636	6.758	5.4906	3.3856	0.8726	4.3604	6.8074	5.288	3.8044	2.5363	6.0766	5.5868	4.891	2.5972	5.6674	5.3726	4.0884	-4.6082	9.6654	8.7871	4.1482	5.6499	5.8061
GBMLGG	Tumor	TCGA-S9-A6U2-01	6.67765	4.1684	4.0985	2.9319	3.7919	5.6032	4.6804	4.81	5.8687	2.9729	4.4556	4.4996	5.0747	2.6918	2.9262	3.9327	3.6961	-1.5951	5.1639	1.7097	3.1797	-0.2328	3.2313	6.0253	5.3381	4.4842	1.3623	4.1748	5.7911	4.6341	4.2818	4.6433	5.4182	6.4323	5.8687	3.4739	5.6032	4.6804	4.81	-9.9658	9.3771	8.8609	5.4006	5.5595	5.3893
GBMLGG	Tumor	TCGA-12-0618-01	6.78572	4.6277	4.3862	3.8279	3.6347	5.403	5.5451	4.6177	5.7803	3.6635	5.0135	5.0135	4.8871	2.824	3.8085	5.2544	2.8994	2.2452	5.8543	0.6517	3.6961	1.8323	2.4332	6.6632	5.8278	3.5022	1.6604	4.0454	6.779	5.0926	4.5934	4.0627	6.3058	5.4647	5.7803	2.8681	5.403	5.5451	4.6177	-5.5735	9.6629	9.4638	4.852	5.4976	5.3678
GBMLGG	Tumor	TCGA-27-2524-01	6.5284	4.6543	3.906	3.1311	3.4778	4.1692	5.31	3.2112	3.9552	2.9655	4.5217	4.366	4.2196	1.9264	2.876	4.9819	0.5763	0.2522	5.1587	0.2762	2.6441	-0.1993	0.4552	6.949	4.5324	2.2842	0.6699	3.2856	6.6655	4.1294	2.8582	1.6964	5.6297	3.8621	3.9552	1.2696	4.1692	5.31	3.2112	-6.5064	8.4876	9.0519	3.0995	5.0828	5.3758
GBMLGG	Tumor	TCGA-TQ-A7RH-01	6.10539	3.74	3.9365	2.9243	3.8451	4.951	4.8319	4.2639	5.5964	2.9071	4.5892	5.0584	4.3548	2.2783	3.2018	3.8228	4.4536	-0.9971	5.4503	1.4911	3.1797	0.2277	2.6895	5.8605	5.8652	3.5971	1.5709	3.7635	5.671	5.2939	3.8218	3.3842	5.4906	5.9873	5.5964	3.2602	4.951	4.8319	4.2639	-9.9658	9.3265	8.7018	4.5342	5.0764	4.7088
GBMLGG	Tumor	TCGA-08-0386-01	7.47463	4.8355	4.4277	4.0313	4.1708	5.6519	5.8992	4.7592	5.3796	3.7324	5.5255	4.215	4.8515	2.3953	4.0696	4.3674	2.5462	0.8082	6.0544	1.8604	3.5374	0.4865	1.4547	6.9813	5.605	3.6359	2.0535	4.3723	6.9415	4.8635	4.9695	4.248	6.0106	6.1653	5.3796	2.6302	5.6519	5.8992	4.7592	-2.8262	9.5784	9.269	5.0713	5.8617	5.9784
GBMLGG	Tumor	TCGA-DB-A75M-01	5.93967	3.5982	3.3364	2.7007	4.0001	5.3463	4.9021	3.7017	5.8311	2.7379	4.1804	4.3958	4.9045	2.128	2.8994	3.6838	3.9801	-2.8262	4.6821	1.3956	2.9875	-0.7834	1.8444	6.4048	5.3005	2.945	0.7233	3.9478	5.4074	5.0884	3.3119	4.0824	5.9674	6.229	5.8311	2.4439	5.3463	4.9021	3.7017	-9.9658	9.4507	9.1444	4.235	4.5142	4.8822
GBMLGG	Tumor	TCGA-HT-8012-01	6.13486	4.2134	4.0189	3.0498	3.5199	5.405	4.4122	4.2951	6.0018	3.2526	4.9251	4.4615	5.2079	2.561	2.4753	4.2503	4.2661	-3.6259	4.8228	0.9191	2.8838	0.346	2.9984	6.1847	5.4239	4.0985	0.8327	4.01	5.6949	4.8172	3.6849	4.5669	5.7428	6.1567	6.0018	3.4237	5.405	4.4122	4.2951	-9.9658	9.0692	8.9868	4.8997	5.1494	4.7121
GBMLGG	Tumor	TCGA-S9-A7QW-01	5.87871	3.945	4.1111	2.8014	3.9883	5.1799	5.0374	3.7313	5.542	2.8974	4.6798	4.1119	4.6583	2.0673	3.002	5.243	3.7667	-4.2934	5.2434	1.2455	2.7029	-0.9406	2.1988	6.4007	5.4822	2.8819	1.4228	4.1708	5.634	5.6068	3.838	3.6566	5.3851	6.454	5.542	2.3732	5.1799	5.0374	3.7313	-9.9658	9.3018	9.2518	4.2366	5.2388	4.6697
GBMLGG	Tumor	TCGA-P5-A733-01	5.05919	2.8219	2.6395	2.6464	3.4411	4.3428	4.1636	3.1245	5.101	2.0218	3.9194	3.8279	3.9308	1.6964	2.3649	1.3109	3.0791	-3.1714	3.3435	1.1897	1.177	-1.685	1.5902	4.9982	4.4726	2.4701	0.8647	2.7931	5.5519	4.3484	2.9581	3.4635	5.1235	5.3045	5.101	1.7786	4.3428	4.1636	3.1245	-9.9658	9.082	8.582	3.4739	4.4162	4.1891
GBMLGG	Tumor	TCGA-E1-A7Z4-01	6.39335	4.085	3.834	3.222	4.1756	5.2025	5.0273	3.9118	5.7211	3.154	4.5411	4.6611	4.2227	2.376	3.1876	4.1302	4.3024	-3.458	5.1887	0.5859	2.7161	-0.5973	2.5561	5.8289	5.8107	3.5645	1.4174	4.1294	4.9444	5.3417	3.402	3.8876	5.9637	6.3918	5.7211	2.05	5.2025	5.0273	3.9118	-9.9658	9.6683	9.3173	3.9421	4.4855	5.2331
GBMLGG	Tumor	TCGA-DU-A5TR-01	5.84146	3.3379	3.1892	1.9931	3.453	4.6253	4.3342	3.1588	4.5577	2.2051	3.5742	4.3688	4.4713	1.1833	2.2931	3.4411	2.7117	-3.1714	4.2884	1.2934	2.2543	-1.0262	1.1447	5.7361	5.0798	2.1541	0.3685	3.1939	5.6273	4.6247	2.4198	2.7742	5.166	4.9093	4.5577	1.9931	4.6253	4.3342	3.1588	-9.9658	8.4977	7.9832	3.335	4.2327	4.4033
GBMLGG	Tumor	TCGA-FG-8185-01	6.02461	4.2488	3.8259	2.9356	3.4596	5.2769	4.9327	4.0357	5.6519	3.136	4.2795	5.5151	5.3331	2.3193	2.7249	1.7009	5.1273	-4.035	4.964	2.7508	2.3164	-0.1504	2.7227	6.3468	5.3527	3.0637	1.0915	3.7039	5.8692	5.0845	3.3464	3.795	5.5342	5.8014	5.6519	2.824	5.2769	4.9327	4.0357	-9.9658	9.3436	9.2744	4.034	5.0833	4.8105
GBMLGG	Tumor	TCGA-HW-8320-01	6.23684	4.1539	3.9965	3.1162	3.7919	5.3049	5.3488	4.4549	5.8176	2.9469	4.3744	4.6404	5.2502	2.6138	3.7138	1.7316	4.3148	-2.3884	5.0519	1.8363	2.8076	-0.5543	3.027	5.8731	5.6946	3.5827	1.7744	3.9561	5.9514	4.3855	4.1302	4.2258	5.5457	6.4858	5.8176	3.027	5.3049	5.3488	4.4549	-9.9658	9.2988	9.0931	4.6927	5.0566	5.0122
GBMLGG	Tumor	TCGA-CS-6667-01	5.50656	3.7603	3.1939	2.4063	3.3966	4.6804	4.63	3.7625	5.6445	2.8897	4.2227	3.6623	4.5154	1.5415	2.8916	3.0893	4.2009	-2.114	4.0867	1.4065	2.2573	-0.7588	2.233	4.7661	5.3005	3.2018	1.2815	3.5754	5.6744	4.7049	3.7496	3.7083	5.3086	5.4928	5.6445	2.7161	4.6804	4.63	3.7625	-4.2934	9.0656	9.062	4.4108	4.4784	4.5814
GBMLGG	Tumor	TCGA-DU-5849-01	5.76868	4.0523	3.6816	3.3993	3.7783	5.1827	4.6949	4.1498	5.5037	2.7161	4.1302	4.2803	4.774	2.3106	3.0757	3.5682	3.1228	-3.458	4.6317	1.3167	2.2175	-0.8599	2.4934	6.0323	4.835	3.9204	1.2333	3.9393	5.5744	4.3126	4.2358	4.421	5.7887	6.2281	5.5037	2.5338	5.1827	4.6949	4.1498	-9.9658	8.8121	8.6677	4.6212	5.3049	4.6335
GBMLGG	Tumor	TCGA-DB-5279-01	6.0514	4.588	3.3307	3.3633	3.2065	5.1052	4.6294	4.8987	5.4476	3.1062	4.3155	3.7496	4.5687	2.824	3.1844	3.773	3.1311	-4.035	3.8818	1.9527	1.8564	-1.685	2.1702	6.2959	4.7236	4.6759	1.6512	3.4358	6.2336	4.6657	4.6634	4.8294	5.6171	7.0612	5.4476	2.9839	5.1052	4.6294	4.8987	-9.9658	8.8132	8.7436	4.7934	5.6994	5.1211
GBMLGG	Tumor	TCGA-06-0190-01	7.18275	4.2951	4.0619	3.3759	3.3814	5.3434	5.6758	4.5436	4.9141	3.5149	4.359	4.4615	5.0423	2.4198	3.6417	4.7819	2.5634	1.8201	5.8342	1.177	3.4881	0.1388	1.7828	6.8081	5.3042	3.3478	1.7702	4.0488	7.0758	4.8395	3.9506	2.6019	5.5595	5.489	4.9141	2.6783	5.3434	5.6758	4.5436	-1.3921	9.1782	8.935	3.945	4.7719	5.8568
GBMLGG	Tumor	TCGA-CS-6670-01	5.50969	4.0462	3.0092	3.011	3.4804	5.0488	4.4074	3.9289	5.3067	2.7336	4.232	4.2973	4.4855	2.0004	2.5036	3.0515	2.9929	-3.6259	4.149	0.9716	1.8762	-1.0862	2.5137	6.013	4.6832	3.8621	0.9268	3.8289	5.5632	4.9055	3.8116	4.3119	5.6338	6.1753	5.3067	2.1047	5.0488	4.4074	3.9289	-9.9658	8.4288	8.4972	4.3674	4.8763	4.7746
GBMLGG	Tumor	TCGA-DB-A64V-01	5.83645	4.0575	4.1474	2.8076	3.9965	5.1223	4.3639	3.8177	4.9617	2.8034	4.6854	4.0824	5.0059	1.9149	2.5536	4.4142	2.982	-2.4659	4.6253	0.679	1.9527	-1.2828	1.6234	5.8751	4.863	3.1179	0.1388	3.5098	5.7082	5.0162	3.1829	3.3364	5.7236	5.3245	4.9617	2.1606	5.1223	4.3639	3.8177	-9.9658	8.8896	8.3906	4.162	4.6999	4.5249
GBMLGG	Tumor	TCGA-06-0745-01	6.45136	3.3336	3.8095	3.1028	2.8422	5.1879	4.935	3.6905	4.1579	3.0602	4.5614	3.9992	4.0799	1.4704	3.1475	4.9723	1.4335	1.692	5.2072	1.0293	2.2603	0.0014	0.7999	7.0338	4.1891	2.3843	0.6699	2.8897	6.6605	4.7893	3.2915	2.4465	5.6744	5.3851	4.1579	1.6093	5.1879	4.935	3.6905	-9.9658	9.0144	8.524	3.5174	4.836	5.1799
GBMLGG	Tumor	TCGA-DU-5854-01	6.36756	3.4945	3.6669	3.5299	3.6961	5.1847	4.8192	4.2434	5.4503	2.6828	4.4842	3.9251	5.1211	2.5511	3.5073	4.3406	3.2526	1.3956	5.2552	1.5165	3.4569	-0.3201	2.3106	5.8001	5.005	4.0952	1.5013	3.6714	5.6488	4.3024	4.3786	4.6118	5.7088	6.1463	5.4503	3.0074	5.1847	4.8192	4.2434	-9.9658	9.3118	8.7382	4.3299	4.8724	5.1469
GBMLGG	Tumor	TCGA-DH-A7UR-01	6.49507	4.041	4.3744	3.2112	3.7215	5.278	4.6793	3.74	5.7118	2.9893	4.7388	4.8535	5.1388	2.4831	2.5852	3.8013	3.5559	-3.0469	5.7334	1.1577	2.8799	0.2522	2.3164	6.8563	5.2943	3.863	1.0007	4.2457	5.717	5.2518	3.4143	3.9156	5.9122	5.6876	5.7118	2.9893	5.278	4.6793	3.74	-6.5064	9.1131	8.6104	4.6456	5.8063	4.7022
GBMLGG	Tumor	TCGA-S9-A6WL-01	6.01211	4.0601	3.7709	3.6883	3.3535	5.0501	4.4556	4.4223	4.9746	2.8055	4.5047	4.443	4.9065	2.3953	3.3661	4.245	3.5224	-2.6349	5.4683	1.5806	2.9674	-0.2328	1.9822	6.2367	5.0841	3.6748	1.3225	3.5863	5.8291	4.3618	4.1724	4.3068	5.7288	6.2073	4.9746	3.4075	5.0501	4.4556	4.4223	-9.9658	8.8155	8.5393	4.809	5.7837	4.9635
GBMLGG	Tumor	TCGA-HT-7880-01	5.03078	3.4765	3.3828	2.8117	3.4726	4.5994	4.6543	3.5682	5.0405	2.0707	3.8013	3.6905	4.2243	1.7532	3.2677	4.1859	3.335	-1.4699	4.3002	0.9862	2.6232	-1.3921	1.5266	5.3937	4.6218	3.0428	0.6145	3.4061	5.0794	3.8925	3.0927	3.8729	5.6837	5.8367	5.0405	2.7931	4.5994	4.6543	3.5682	-9.9658	8.6471	8.2096	4.4317	4.9279	4.2404
GBMLGG	Tumor	TCGA-26-5135-01	6.8441	3.8157	3.9232	3.0358	4.0055	4.97	5.0343	3.8451	4.7377	2.9857	4.6428	5.0968	4.8202	1.9564	3.6928	4.6809	2.1606	0.8488	6.3133	1.0151	3.4945	0.3573	1.4756	7.0635	5.0045	3.1377	1.5064	4.1194	6.1175	5.0255	3.7762	3.5111	5.7887	5.2165	4.7377	2.2603	4.97	5.0343	3.8451	-6.5064	9.0804	8.6586	3.867	4.8545	5.3406
GBMLGG	Tumor	TCGA-E1-5318-01	6.78622	4.728	3.8198	3.1924	2.8542	5.3381	4.7033	4.9787	5.5763	3.4451	4.1128	4.427	4.4887	2.2633	2.874	0.9862	3.2915	-2.2447	5.0674	1.1382	2.5388	-0.4521	3.3731	6.6726	4.5411	4.6508	1.8996	3.9956	5.7074	4.7898	4.3009	4.6271	5.3477	6.0126	5.5763	2.8137	5.3381	4.7033	4.9787	-9.9658	9.0625	9.5009	4.5522	5.7107	5.2153
GBMLGG	Tumor	TCGA-DU-6393-01	6.43229	4.528	4.4216	3.1717	3.245	5.428	4.7121	5.0871	6.2583	3.4765	5.0233	4.1836	5.0985	2.7292	2.9544	1.5806	4.1748	-4.2934	5.7377	1.8722	2.8462	-0.3752	3.2374	6.5833	5.4256	4.9842	1.8404	4.4457	5.9096	5.1056	4.7066	5.1887	5.9695	6.3968	6.2583	3.3235	5.428	4.7121	5.0871	-9.9658	9.5722	9.3861	5.1938	5.7399	5.07
GBMLGG	Tumor	TCGA-41-3915-01	6.29626	4.1954	3.4398	2.5828	2.9581	4.8793	4.7981	3.868	4.523	3.0481	4.222	3.7888	4.085	2.2842	3.1749	3.793	2.1147	1.642	4.9723	1.3397	2.7029	-0.6643	1.5415	6.3012	3.9318	3.2374	1.3283	3.8033	6.6118	4.2691	3.6382	2.3048	5.6988	5.1111	4.523	2.118	4.8793	4.7981	3.868	-5.0116	8.4186	8.4098	4.0952	4.3951	5.0989
GBMLGG	Tumor	TCGA-DU-5853-01	5.87212	4.166	3.8187	2.9692	3.4331	4.9584	5.1211	4.5217	5.4572	2.9618	4.4122	4.018	4.7132	2.2603	3.4224	2.8974	3.4739	-1.1811	4.6508	1.7702	3.0706	-1.1488	2.8955	5.8839	4.8309	3.7877	1.6695	3.8983	5.9591	4.6933	3.9487	4.2017	5.5482	6.1781	5.4572	3.2359	4.9584	5.1211	4.5217	-9.9658	9.0685	9.0082	4.9644	5.0837	5.0841
GBMLGG	Tumor	TCGA-TM-A84J-01	6.4057	4.8625	4.4634	3.906	3.3773	5.5364	6.1665	4.8905	6.1268	3.3017	3.5187	5.5352	5.8625	2.7784	3.644	4.9612	3.6018	-2.1779	6.0689	1.614	4.3569	1.5366	3.2988	6.6833	5.5295	4.2335	2.3423	4.9265	6.7202	5.3016	3.9412	4.5293	5.579	6.2662	6.1268	3.8571	5.5364	6.1665	4.8905	-9.9658	9.7616	9.4381	5.2235	5.605	5.6127
GBMLGG	Tumor	TCGA-FG-5962-01	5.625	4.3463	4.1954	3.6566	3.4856	5.1981	4.623	4.2048	5.2521	2.9966	5.0264	4.1748	4.5892	2.3423	3.2435	4.8744	3.6905	-4.035	5.149	1.3454	2.3337	-1.1488	1.9822	6.2987	5.0104	3.6242	1.4228	4.1153	5.4693	4.5892	4.17	4.222	6.0063	7.0363	5.2521	3.0305	5.1981	4.623	4.2048	-9.9658	8.8522	8.6957	5.1412	5.5653	4.8309
GBMLGG	Tumor	TCGA-27-1831-01	5.34481	5.0418	4.8125	2.6895	1.9264	4.2235	4.9782	4.5336	3.5608	3.4752	4.9654	2.667	3.186	1.9601	3.3307	3.7432	0.346	1.5514	4.1269	1.9931	1.9712	-1.3921	1.0503	5.5964	4.6376	0.7493	0.4016	1.4962	6.6515	4.6433	2.5188	2.3451	3.9883	3.3119	3.5608	1.787	4.2235	4.9782	4.5336	-9.9658	7.6092	9.1541	4.14	6.0949	3.9251
GBMLGG	Tumor	TCGA-F6-A8O4-01	6.02284	3.6417	3.7138	2.7993	3.7149	5.0571	4.8734	3.9289	5.4948	2.9262	4.6899	3.9051	4.4654	2.5561	3.4048	3.1924	3.6759	-2.7274	4.5589	1.683	2.4753	-0.5973	2.5658	6.2819	5.391	3.3563	0.9642	3.945	5.812	4.7635	3.8551	4.026	5.4748	6.3098	5.4948	2.4518	5.0571	4.8734	3.9289	-9.9658	9.4608	8.9506	4.9284	5.3299	4.9714
GBMLGG	Tumor	TCGA-28-1753-01	7.25964	4.1883	3.7149	3.6382	3.4856	5.0947	5.5414	4.3068	5.1579	3.0411	4.8445	4.8963	5.2854	2.0638	3.3883	4.5411	1.9415	0.058	6.2165	0.7748	3.8521	1.0433	2.2113	6.6595	5.2373	3.2722	1.4859	4.6668	5.8238	4.9937	4.2173	3.8105	5.698	5.8354	5.1579	3.0358	5.0947	5.5414	4.3068	-3.1714	9.8458	9.059	4.3009	4.6905	5.7911
GBMLGG	Tumor	TCGA-S9-A7R1-01	5.68989	4.0419	3.7992	3.1393	3.3535	5.0756	4.3827	4.0601	5.6832	3.1377	4.7302	4.0046	4.8038	2.3508	2.3222	3.7593	3.421	-2.6349	4.6804	0.5955	1.934	-0.6643	2.6579	6.079	4.7767	3.8954	1.1833	3.623	5.7957	4.8002	4.1994	4.1828	5.3576	5.9079	5.6832	2.9488	5.0756	4.3827	4.0601	-9.9658	8.7699	8.7813	4.7877	5.2483	4.6422
GBMLGG	Tumor	TCGA-12-5295-01	6.11376	5.4108	3.402	2.6828	2.3308	4.6171	5.1014	3.9478	3.6804	2.5036	4.9737	3.7475	3.5473	2.1013	3.4424	3.6393	0.9493	-0.2328	4.4496	1.0779	2.5011	-2.2447	0.1519	6.597	3.4945	2.4908	0.2881	1.8643	6.5258	4.6271	3.6266	1.7097	4.9393	4.4667	3.6804	1.1184	4.6171	5.1014	3.9478	-9.9658	8.3951	8.9672	2.9469	4.5367	5.2032
GBMLGG	Tumor	TCGA-TM-A84M-01	6.745	4.3834	4.1417	3.8198	3.1939	5.6369	4.38	4.652	5.8834	3.3773	4.4364	5.0144	5.5832	3.5187	3.6612	3.4344	4.6502	-3.3076	5.8787	2.0707	2.7826	0.5271	3.6612	7.1264	5.7576	4.5173	2.0604	4.3716	5.8912	4.9021	4.479	4.6428	5.3879	6.4806	5.8834	3.66	5.6369	4.38	4.652	-9.9658	9.7756	9.1472	5.0197	5.677	5.2196
GBMLGG	Tumor	TCGA-HT-8107-01	4.68648	3.9327	3.3619	3.186	3.3105	4.6832	4.9463	4.1644	5.0104	2.5683	4.0892	3.7961	3.9156	2.1047	3.6861	3.9031	2.8562	-2.5479	4.0532	1.0642	2.5462	-1.3548	1.2815	4.8043	4.2766	3.3221	1.6374	3.2722	5.5426	3.7603	3.8013	4.5117	5.8602	6.3663	5.0104	3.3703	4.6832	4.9463	4.1644	-9.9658	8.3953	7.9719	4.8294	5.5537	4.1788
GBMLGG	Tumor	TCGA-P5-A5ET-01	5.86219	4.4061	3.9261	3.208	3.9783	5.3625	4.5742	4.2212	5.4699	2.9224	4.5398	4.7329	5.7685	1.8036	2.6185	4.7861	4.0488	-3.816	5.2453	1.196	2.8681	-0.3022	2.5511	6.3194	5.3241	3.4116	0.605	3.9682	5.5607	5.1127	3.3883	3.87	5.6634	5.7877	5.4699	2.7679	5.3625	4.5742	4.2212	-9.9658	9.2048	8.7762	4.7236	5.3913	4.6422
GBMLGG	Tumor	TCGA-P5-A72W-01	5.58318	3.9099	2.8897	2.6185	4.0532	4.9137	4.6479	3.2707	5.1831	2.6738	4.1867	4.3206	3.6054	1.3846	2.409	2.7931	3.325	-3.458	4.8689	0.7233	1.8643	-1.5951	1.5064	6.7621	4.926	2.5288	0.5955	3.6335	4.9308	5.5967	2.909	2.004	5.6285	5.2698	5.1831	0.7058	4.9137	4.6479	3.2707	-9.9658	9.1218	9.9227	2.9525	5.3002	4.4297
GBMLGG	Tumor	TCGA-FG-A70Y-01	5.97411	3.7529	3.38	2.7336	3.9765	4.846	4.9402	3.9002	5.3031	2.9262	4.2442	3.871	4.6854	1.6785	2.8502	4.2995	3.5424	-1.0262	4.4686	1.2696	2.4518	-1.1172	1.9111	5.8347	4.8798	3.1507	1.334	3.6393	5.4118	5.6508	3.3549	2.9966	5.7263	5.857	5.3031	2.2237	4.846	4.9402	3.9002	-9.9658	9.037	8.9673	4.2795	5.1538	4.85
GBMLGG	Tumor	TCGA-TM-A84R-01	4.56194	4.2773	3.6242	3.2707	3.6497	4.7247	4.9755	4.2017	5.1688	2.5924	4.5934	3.623	4.4932	2.5112	3.417	4.248	2.7572	-2.2447	4.1852	1.2756	2.5061	-0.9971	1.595	5.2638	4.4726	3.3591	1.2516	3.4687	5.554	4.4384	3.5718	4.1351	5.7827	6.3489	5.1688	3.2677	4.7247	4.9755	4.2017	-9.9658	8.6266	8.3171	5.1094	5.594	4.2578
GBMLGG	Tumor	TCGA-HW-A5KM-01	6.54027	4.1343	4.041	2.96	3.1179	5.2582	5.4104	4.5868	5.5448	3.2251	4.284	5.0352	4.8545	2.6464	3.6301	3.8167	3.2328	-2.3884	4.9369	1.0642	2.9802	-0.9971	3.162	6.064	4.7501	4.174	1.8323	3.9079	6.2398	4.7866	3.9792	4.2165	5.5874	5.9507	5.5448	2.9319	5.2582	5.4104	4.5868	-9.9658	9.3861	9.3453	4.9237	4.9723	5.3965
GBMLGG	Tumor	TCGA-HT-7477-01	7.61437	4.4523	4.1692	3.7324	4.0892	5.7082	5.765	5.4816	5.8704	3.4034	4.5699	5.4803	5.5611	2.128	4.0225	3.2328	3.9232	-3.1714	6.5368	1.7744	3.5399	1.5216	2.561	7.4478	5.8885	3.8571	2.4063	4.6759	6.4079	6.0197	4.1676	3.868	6.2459	6.4087	5.8704	3.4997	5.7082	5.765	5.4816	-9.9658	9.8254	9.4248	4.4887	4.97	6.1932
GBMLGG	Tumor	TCGA-FG-A87Q-01	6.19767	3.402	3.6277	2.496	3.6066	4.7192	4.1285	3.8239	5.1712	2.9148	4.4476	4.096	4.5085	2.2872	2.8076	4.3807	2.6348	1.5216	5.2017	1.125	3.0944	-0.9686	2.004	5.1788	4.854	2.9857	1.0642	3.5136	5.8612	4.7442	3.4331	3.4635	5.6568	5.0751	5.1712	2.6487	4.7192	4.1285	3.8239	-9.9658	9.2907	8.5681	4.3155	4.8043	4.859
GBMLGG	Tumor	TCGA-FG-A70Z-01	6.55333	3.9755	4.4404	3.2065	3.945	5.3078	5.3016	4.01	5.1599	3.0688	4.5663	4.2396	4.6118	1.2085	3.3689	4.935	2.409	0.8246	5.3064	0.3907	3.1637	-0.2498	1.7617	6.5817	3.9468	3.3717	1.5316	4.1228	5.7788	5.3176	3.7127	3.2282	5.8677	6.0356	5.1599	2.5924	5.3078	5.3016	4.01	-9.9658	9.5268	8.52	4.4621	5.1587	5.374
GBMLGG	Tumor	TCGA-FG-A4MU-01	7.54723	4.2427	4.0696	4.0225	4.1498	6.0378	5.3597	4.6071	5.6165	3.2481	4.9542	5.0009	5.5717	2.1411	3.7646	5.1339	2.8158	1.1833	6.0696	1.1447	3.6566	0.7832	2.2603	6.7399	5.4219	3.7226	1.787	4.1628	7.7166	4.86	4.1169	4.248	6.0622	5.7764	5.6165	3.2811	6.0378	5.3597	4.6071	-9.9658	9.6783	9.3233	4.2327	4.9987	5.8533
GBMLGG	Tumor	TCGA-DB-A4XB-01	6.45799	4.2862	4.1236	3.4713	3.9403	5.6482	5.7112	4.6554	6.2174	3.2481	4.5874	4.8773	5.2331	2.9394	4.4304	3.2826	3.9185	-5.0116	5.5543	1.7141	3.8591	0.537	3.3689	6.6284	5.8311	4.2788	1.9034	4.8778	6.134	5.2736	4.2958	4.8515	5.8922	6.4393	6.2174	3.5098	5.6482	5.7112	4.6554	-6.5064	9.4783	9.1876	5.2114	5.337	5.5772
GBMLGG	Tumor	TCGA-WY-A85D-01	6.15093	4.1636	4.5255	2.8858	4.2111	5.1985	5.1819	3.9552	5.542	3.0619	4.7209	4.9787	5.4631	2.0289	2.7292	2.6395	4.4641	-2.4659	5.3688	1.7273	2.5363	-1.0559	2.081	6.2869	5.8468	3.1604	0.8726	3.9929	5.9052	5.3999	3.154	3.5399	5.6736	5.496	5.542	2.5948	5.1985	5.1819	3.9552	-9.9658	9.6588	9.0528	4.347	5.3768	5.0126
GBMLGG	Tumor	TCGA-FG-7641-01	5.69156	4.4575	3.9755	3.5022	3.7815	5.1855	4.6112	4.5565	5.8965	3.1228	4.5117	4.2503	5.0466	2.609	3.2496	4.1571	4.3024	-1.5522	5.0104	1.4756	2.6278	0.03	2.9071	5.7038	5.3893	4.2488	1.1512	3.7709	5.7703	4.5614	4.3119	4.3793	5.5895	6.6093	5.8965	3.7345	5.1855	4.6112	4.5565	-9.9658	9.2059	8.8455	5.2873	5.6941	4.7835
GBMLGG	Tumor	TCGA-DU-5872-01	5.47673	4.0593	3.2526	3.1844	2.3048	4.7312	4.7415	3.7039	5.1002	1.692	4.0645	4.0756	4.2795	2.5112	3.0038	4.3917	3.0181	-2.8262	4.2134	0.7916	1.9302	-1.5105	2.1925	5.4784	4.5958	3.6006	1.5266	3.5682	4.673	4.6148	3.9251	3.7507	5.4084	6.0453	5.1002	2.2082	4.7312	4.7415	3.7039	-9.9658	8.4393	9.0842	3.9232	4.8269	4.741
GBMLGG	Tumor	TCGA-FG-6689-01	5.48123	4.1441	3.0393	2.7679	3.2143	4.836	5.0575	3.7226	5.4983	3.0637	3.8915	3.7982	4.1069	1.9786	3.2766	3.6804	3.2374	-3.6259	3.7291	0.9642	2.3649	-1.9379	2.3048	5.5361	4.6674	3.7453	1.0915	3.9552	5.6656	4.9218	3.5584	4.1716	5.7043	6.3586	5.4983	2.4727	4.836	5.0575	3.7226	-9.9658	8.8113	8.8103	4.4061	4.5324	4.7442
GBMLGG	Tumor	TCGA-DB-5277-01	6.79256	3.9883	4.4913	3.7083	4.5976	5.6285	5.5967	5.0193	5.4353	3.4318	5.435	6.0211	5.2943	2.1574	3.9865	4.3292	4.7866	-0.4921	5.2269	2.3871	1.8078	-0.0725	1.9968	7.6666	4.8017	3.5073	2.4701	4.0575	6.1447	6.2856	4.6259	4.2181	6.2664	6.5805	5.4353	2.8442	5.6285	5.5967	5.0193	-9.9658	9.2755	9.437	4.2134	6.293	5.4229
GBMLGG	Tumor	TCGA-28-5204-01	6.79702	5.251	4.2833	3.7486	4.1343	5.1268	5.7323	4.7887	5.3765	3.6838	5.2285	4.9084	5.0479	2.4597	4.4906	5.4094	2.108	-0.6193	5.5056	1.4859	4.1086	0.547	2.2482	7.1849	5.2743	3.8896	1.6785	4.6071	5.9491	5.2005	4.8187	4.0242	5.5916	5.1273	5.3765	2.7868	5.1268	5.7323	4.7887	-2.8262	9.9037	9.4006	4.4726	5.432	5.9456
GBMLGG	Tumor	TCGA-HT-A615-01	6.21474	4.8253	4.0383	3.6635	3.2752	5.4627	4.8822	4.613	5.7528	2.6067	4.4621	4.5528	5.1445	2.9984	2.9765	4.2358	3.6714	-1.4699	4.8355	1.3679	2.7572	-1.1811	2.9394	5.9284	5.3954	4.1302	1.0151	3.9089	6.0743	5.1098	4.1153	4.2009	5.5693	6.1215	5.7528	3.055	5.4627	4.8822	4.613	-9.9658	9.2701	9.0106	4.8783	5.6041	4.7756
GBMLGG	Tumor	TCGA-DU-7301-01	6.10056	4.2833	3.794	3.3076	3.325	4.9946	5.3056	4.6713	5.6352	3.0671	4.0532	3.9213	4.2111	2.5876	3.4048	2.128	2.8381	-2.4659	4.5079	2.183	2.3871	-2.1779	2.9319	6.047	4.717	3.5535	1.9822	4.3958	6.4795	4.4868	4.4983	3.9673	5.579	6.6963	5.6352	2.5363	4.9946	5.3056	4.6713	-9.9658	9.0138	9.2123	4.7645	5.0644	5.096
GBMLGG	Tumor	TCGA-P5-A5EW-01	6.09632	4.366	3.7741	3.1278	3.5098	5.5519	5.6393	4.8033	6.0184	3.0774	4.3869	4.2134	4.735	2.5188	3.3047	3.5803	3.4344	-1.1811	4.7082	1.4808	3.3689	-0.5543	3.3119	6.126	4.9814	4.1644	2.0147	4.3484	5.9545	4.8279	4.2601	4.5614	5.7447	6.7316	6.0184	2.6895	5.5519	5.6393	4.8033	-9.9658	9.372	9.2521	5.0631	4.8635	5.1732
GBMLGG	Tumor	TCGA-06-2569-01	7.0782	4.5934	3.9242	3.9636	3.6101	5.2238	5.6639	5.2958	4.841	3.7421	5.1094	5.7656	5.1977	1.9073	4.1523	3.8064	2.727	0.1388	6.2587	1.2576	6.205	0.7916	2.128	6.5113	5.1859	2.4571	1.7912	3.7127	6.7395	5.5958	3.551	3.8925	5.5808	4.5547	4.841	2.3649	5.2238	5.6639	5.2958	2.2019	8.557	9.1363	4.5832	6.2715	5.5327
GBMLGG	Tumor	TCGA-HT-A5RB-01	5.83006	3.9012	3.4958	2.8562	3.2435	5.0081	5.0713	4.2312	5.5558	2.7227	3.6136	4.5098	5.1355	2.4985	3.2049	2.561	3.7857	-3.0469	5.0104	1.4547	2.9839	0.0158	2.9729	5.6577	5.1863	3.4304	1.5216	3.7909	4.86	4.3002	3.6359	4.018	5.284	6.1318	5.5558	3.2405	5.0081	5.0713	4.2312	-9.9658	9.0534	8.7308	4.7709	5.0888	4.756
GBMLGG	Tumor	TCGA-E1-A7YN-01	6.33516	4.178	3.8973	3.0376	3.9318	5.3136	5.1875	4.0688	5.4912	3.1045	4.7394	4.7329	4.856	2.5487	3.5766	5.0206	3.0127	1.7489	4.8719	1.8036	3.055	-1.5105	2.1213	5.6206	5.1014	4.3903	1.7532	3.421	6.8531	5.1182	4.0756	4.1474	5.7869	5.4896	5.4912	3.2973	5.3136	5.1875	4.0688	-9.9658	9.4037	9.0807	5.1318	5.4213	5.2574
GBMLGG	Tumor	TCGA-27-1830-01	6.74777	4.1684	4.0348	3.5935	3.1892	5.3597	5.5201	4.5192	5.2653	3.2112	4.4297	4.9937	5.3858	2.7161	3.5851	4.9141	2.909	1.0573	5.2913	1.3735	3.3017	0.9862	1.934	6.2321	5.1796	3.4997	1.5165	4.3104	7.6406	5.3889	4.2165	3.1426	5.8488	5.2559	5.2653	3.186	5.3597	5.5201	4.5192	-2.114	9.5504	9.0187	4.5161	5.789	5.7809
GBMLGG	Tumor	TCGA-QH-A6XC-01	6.37102	3.7593	3.5694	3.4609	4.3931	5.6656	4.764	3.4739	5.0977	2.6805	5.0917	4.3772	4.9435	1.196	3.0515	5.3844	2.3649	0.9789	5.4526	0.2642	2.7636	-0.5125	0.8488	6.74	4.9575	2.5561	0.3685	3.8778	5.7442	4.8748	3.5547	3.5766	5.7104	5.393	5.0977	2.1734	5.6656	4.764	3.4739	-9.9658	9.737	8.7858	3.9974	4.7861	4.8415
GBMLGG	Tumor	TCGA-06-2559-01	6.94137	4.6634	4.1027	3.8157	3.3321	5.2987	5.5589	4.9074	5.6537	3.5424	4.5772	5.1194	5.2969	2.9167	4.0705	4.2165	3.9487	0.517	5.9103	2.5388	3.7475	1.2271	2.7742	6.8596	5.6837	5.288	2.2019	3.9792	7.2878	5.1069	4.533	3.3966	5.9409	5.8875	5.6537	3.3787	5.2987	5.5589	4.9074	-1.9942	9.803	9.609	5.09	5.6682	5.6574
GBMLGG	Tumor	TCGA-S9-A6WN-01	6.04588	3.8239	2.7465	3.1556	3.3745	6.2462	4.2088	4.404	5.0251	2.9224	4.1441	3.7226	4.7214	2.7679	2.7508	2.6371	3.1212	-1.4699	4.4829	1.7617	1.9452	-0.5756	1.9111	5.5445	4.2639	4.518	1.3397	3.4843	6.2548	4.5129	3.5754	4.691	5.9867	6.4311	5.0251	2.7183	6.2462	4.2088	4.404	-9.9658	8.7084	8.6072	4.4503	5.225	5.1132
GBMLGG	Tumor	TCGA-06-0139-01	5.42084	4.0901	3.7324	2.2299	2.3106	4.4142	4.7291	4.162	3.5149	3.1924	4.6335	3.5994	3.9223	2.6067	3.2692	3.8973	1.2023	-0.4325	4.4549	1.3791	2.3704	-1.2142	1.105	5.5423	4.2142	2.2931	0.4125	2.7314	7.5586	4.6118	2.7487	1.6327	4.6854	3.945	3.5149	1.8444	4.4142	4.7291	4.162	-2.6349	7.4669	8.4839	3.0995	4.8425	4.3399
GBMLGG	Tumor	TCGA-DB-A64L-01	5.84676	4.565	3.8167	3.6883	3.2662	5.3013	4.63	4.5079	5.8438	2.8158	5.0532	4.6242	5.206	3.1844	2.9581	3.9571	2.9167	-1.5522	4.4732	0.434	2.0218	-0.6873	1.8604	5.85	4.4384	4.2442	0.9716	3.136	5.9096	4.9397	3.7971	3.8471	5.947	5.7173	5.8438	3.0757	5.3013	4.63	4.5079	-9.9658	8.8976	8.5964	4.6023	6.0766	4.3321
GBMLGG	Tumor	TCGA-TM-A84I-01	6.94742	4.5154	4.2495	3.5982	3.7149	5.2631	5.8555	4.6611	5.7934	3.0463	3.5633	6.2244	4.6674	2.8137	4.2556	1.6964	3.8461	-0.4325	5.8948	1.7053	3.7443	1.0433	3.1278	6.908	5.7735	4.431	2.7805	4.748	6.3887	5.2142	3.9929	4.5583	5.3699	6.6534	5.7934	2.791	5.2631	5.8555	4.6611	-5.5735	9.805	9.2274	4.9454	5.3198	5.4858
GBMLGG	Tumor	TCGA-QH-A6CZ-01	5.44888	4.2243	4.1587	3.2511	3.0671	5.2821	4.4483	4.3548	5.7399	2.3135	4.6253	4.2381	5.2072	2.5536	2.9032	3.6872	3.6883	-4.035	4.5454	1.7532	1.787	-1.3183	2.8076	5.9439	4.433	3.7039	1.105	3.7028	5.701	4.8279	3.9515	4.7383	5.6952	6.3284	5.7399	3.4856	5.2821	4.4483	4.3548	-9.9658	9.4811	8.831	4.9603	5.5922	4.6089
GBMLGG	Tumor	TCGA-WY-A858-01	5.61795	3.2018	3.6983	2.3649	2.5707	4.17	4.4061	3.0568	4.6159	1.6649	3.7752	4.1579	4.2593	1.46	2.5437	3.5161	4.2258	-1.2142	4.7005	0.4447	2.0979	-0.7834	1.2394	5.2567	4.322	2.2482	0.6425	2.9581	4.8505	4.7793	2.6019	2.8117	4.5675	4.6753	4.6159	1.9931	4.17	4.4061	3.0568	-9.9658	8.8255	8.3341	3.4622	4.3548	4.0943
GBMLGG	Tumor	TCGA-VM-A8CB-01	5.91341	4.9012	5.0514	3.8739	3.3979	5.4689	4.4569	4.1053	5.6637	2.6533	5.3611	5.1273	5.891	2.5852	2.0638	4.4061	4.2134	-3.6259	5.438	0.6239	2.2931	-0.4921	2.0111	6.4676	5.0896	3.7006	0.9343	4.2578	5.8741	5.6557	3.833	3.5994	5.7203	5.5503	5.6637	2.9839	5.4689	4.4569	4.1053	-9.9658	9.226	8.6631	4.5466	5.8485	4.2312
GBMLGG	Tumor	TCGA-27-2526-01	5.58612	4.2533	4.1676	3.0688	3.1556	5.2304	4.7704	4.215	3.8136	2.6984	4.7682	3.4622	3.2677	1.4335	3.3206	4.9644	1.3051	-0.9971	3.7909	2.1638	1.8879	-2.114	-0.013	6.2585	4.4542	2.299	-0.0725	2.3423	6.1691	4.5681	3.2002	2.2144	5.1002	4.7138	3.8136	0.3907	5.2304	4.7704	4.215	-9.9658	8.31	8.9776	3.3393	5.5088	5.1756
GBMLGG	Tumor	TCGA-VM-A8CF-01	5.6792	3.3134	3.6782	2.0535	3.9147	4.322	4.0541	3.5249	4.4803	2.1766	4.9617	3.8541	4.2884	1.2147	1.8643	3.9847	3.0481	-1.5522	4.2119	0.3231	1.4335	-1.5105	0.9642	6.2114	4.8734	1.3051	1.3846	3.136	4.9199	6.2042	2.5996	2.05	5.3045	5.0571	4.4803	0.8883	4.322	4.0541	3.5249	-9.9658	8.6295	8.4551	3.0774	4.8684	4.6594
GBMLGG	Tumor	TCGA-06-5856-01	6.79623	5.0273	4.4457	4.0207	3.2297	5.2331	6.0175	4.5958	5.3005	3.0002	4.4095	5.3096	5.405	2.609	4.0001	4.3364	3.3192	1.3846	5.5778	1.4228	2.8641	0.0718	1.7744	6.7645	5.3615	3.7237	1.8444	4.1053	6.8128	5.2732	3.9901	3.1195	6.0293	6.1799	5.3005	3.2343	5.2331	6.0175	4.5958	-6.5064	9.6177	9.1744	4.3184	4.9805	5.4803
GBMLGG	Tumor	TCGA-HT-7608-01	5.4607	3.6905	2.6895	2.4035	3.4556	4.7709	3.7248	3.6113	5.1223	2.4198	4.3583	3.4583	4.0278	1.8524	2.036	3.4856	2.8779	-4.035	3.5875	0.7233	1.9786	-1.1488	1.9415	5.4964	4.701	3.5461	0.4761	3.154	5.3972	4.245	3.4291	3.9127	5.3356	6.2022	5.1223	1.8078	4.7709	3.7248	3.6113	-9.9658	8.8109	8.4381	4.4095	4.711	4.6899
GBMLGG	Tumor	TCGA-CS-4938-01	5.33632	3.9819	3.4635	2.9205	2.8055	4.9691	4.958	3.9099	5.2884	2.0742	4.4128	3.5212	4.3477	1.8801	2.6161	3.8157	3.5111	-3.0469	3.9682	1.816	2.3704	-2.114	2.1247	6.0668	5.1692	3.2856	1.3846	3.8769	5.8344	5.0519	3.5645	4.3958	5.8854	6.9333	5.2884	2.1957	4.9691	4.958	3.9099	-9.9658	8.9904	9.0425	4.1946	4.5442	4.905
GBMLGG	Tumor	TCGA-QH-A6X5-01	5.58465	3.9992	3.2572	2.9071	3.8511	5.018	4.174	3.6054	5.3954	2.9319	4.7507	3.87	4.9955	2.1213	2.4544	3.9929	3.5022	-3.3076	4.2274	0.5666	2.2693	-1.2142	1.9302	5.9296	4.8905	2.8422	0.4125	3.6089	5.4909	4.8655	3.4291	4.018	5.5277	5.8914	5.3954	2.4063	5.018	4.174	3.6054	-9.9658	9.3114	8.86	4.506	4.783	4.6059
GBMLGG	Tumor	TCGA-DU-8166-01	6.30929	4.1523	4.1252	2.4805	3.3293	5.5164	5.62	4.9327	6.0215	3.5009	4.3119	4.4913	4.8172	2.7444	3.8531	3.4061	3.832	-0.8863	4.9036	1.8801	3.1939	0.2154	3.7909	5.9667	5.6032	4.4404	2.2842	4.4476	6.1285	4.7214	4.7469	4.9764	5.6565	6.4914	6.0215	3.287	5.5164	5.62	4.9327	-9.9658	9.653	9.2521	5.0255	5.3187	5.2969
GBMLGG	Tumor	TCGA-HT-8018-01	5.52641	4.1002	3.6195	3.3521	3.5779	5.1268	5.24	4.2064	5.3424	2.7951	4.6047	3.8531	4.4983	2.0673	3.4424	4.2586	3.1765	-1.4699	4.2126	1.3051	2.9674	-0.9406	2.0254	5.8674	4.4719	3.5669	1.5115	3.866	5.9407	4.6012	3.5035	4.3177	6.1202	6.2602	5.3424	3.1344	5.1268	5.24	4.2064	-3.0469	8.8716	8.7254	4.5429	5.1583	4.7872
GBMLGG	Tumor	TCGA-DU-7292-01	5.89286	3.8116	3.3633	3.2511	3.6125	5.1081	5.1215	4.4013	5.2555	2.727	3.9682	3.7678	4.3632	2.1345	3.5312	4.1836	2.6114	-0.0725	4.5479	1.2333	2.9432	-0.7346	1.8996	6.1056	4.5832	3.5224	1.2875	4.0892	5.7824	4.245	4.3958	4.1867	6.0446	6.4157	5.2555	2.8838	5.1081	5.1215	4.4013	-9.9658	9.0298	8.6202	4.6485	5.2442	5.1031
GBMLGG	Tumor	TCGA-S9-A6TU-01	5.80992	3.2236	2.4279	3.1344	3.5349	4.6966	4.3342	3.1749	5.3292	2.2901	4.3583	4.2987	5.0131	1.595	3.0411	2.8014	3.8798	-2.0529	4.7121	0.7146	2.4701	-1.2481	1.692	6.1926	5.3385	3.1344	1.2147	3.7171	5.1404	4.8125	3.402	3.6657	5.441	5.3495	5.3292	2.4171	4.6966	4.3342	3.1749	-9.9658	9.0016	8.6907	3.9384	4.1756	4.4861
GBMLGG	Tumor	TCGA-DB-A75P-01	5.17515	3.0808	2.3536	2.4063	3.9947	4.4364	4.306	3.3148	4.812	2.2513	3.867	3.5669	4.1285	1.5758	2.4883	4.0824	2.727	-0.2845	3.7389	0.4233	2.5112	-1.8314	0.6145	5.7369	4.182	2.4063	0.5859	3.1409	4.8545	4.4996	2.9929	3.5935	5.5589	5.6696	4.812	1.9712	4.4364	4.306	3.3148	-4.6082	8.5859	8.2429	3.9403	4.1103	4.6445
GBMLGG	Tumor	TCGA-06-5418-01	6.31689	4.7181	3.8116	3.1195	3.5149	5.2548	4.3378	4.6023	4.7861	3.616	5.0104	4.4713	4.582	2.409	3.6748	5.2777	1.2394	1.3454	4.6071	1.6327	3.1458	-1.0262	1.7489	6.5534	5.3965	3.7888	1.6649	3.5149	7.8739	4.5982	4.562	3.3717	5.9966	4.2541	4.7861	2.2421	5.2548	4.3378	4.6023	-3.3076	9.0098	9.3377	3.8935	4.8635	5.2653
GBMLGG	Tumor	TCGA-FG-6691-01	6.61429	4.2847	4.1236	3.2707	3.0757	5.2265	5.3868	5.076	5.6795	3.4264	4.7898	4.5583	4.6294	2.9765	3.8521	3.907	3.4007	-1.1811	4.6451	1.334	2.5137	-0.9406	3.3814	5.9096	4.7666	4.2736	2.2299	4.5553	6.1932	5.0588	4.8837	4.6702	5.5714	6.543	5.6795	2.8341	5.2265	5.3868	5.076	-9.9658	9.2521	9.2626	4.795	5.1416	5.3342
GBMLGG	Tumor	TCGA-DU-6399-01	6.57846	4.1748	3.7072	3.2405	3.3206	5.0756	5.5847	4.6224	5.6059	2.9432	4.4654	4.2818	4.4951	2.5137	3.7432	2.6019	3.2481	-2.8262	4.9792	1.4388	2.694	-0.8863	2.8542	6.7374	4.842	4.2181	2.0878	4.4344	5.8475	4.382	4.6685	4.5117	5.5012	6.4055	5.6059	2.5163	5.0756	5.5847	4.6224	-9.9658	9.1544	9.2312	4.8053	5.0068	5.3886
GBMLGG	Tumor	TCGA-S9-A7IQ-01	4.87188	4.2556	3.5161	3.2707	3.868	5.0348	5.0532	4.1628	5.2335	2.6487	4.5318	3.8808	4.6065	1.7995	3.2267	4.6106	3.1011	-4.6082	4.6029	0.8726	2.6348	-0.8599	1.3567	5.5635	4.6159	2.9562	1.1512	3.7475	5.5292	4.2736	3.8126	4.0782	6.1077	6.5474	5.2335	2.9432	5.0348	5.0532	4.1628	-9.9658	8.8383	8.1176	5.0014	5.569	4.4463
GBMLGG	Tumor	TCGA-06-5414-01	7.21454	4.5466	4.0748	3.741	4.0225	6.4979	5.36	4.6341	5.1587	3.3235	4.8555	4.641	4.8213	2.5011	3.981	4.2825	1.7097	1.8996	5.3951	0.8164	3.3163	-0.3566	2.1509	6.6078	4.9374	3.38	1.4335	3.6771	7.6711	4.528	4.2111	3.4583	5.3162	5.8289	5.1587	2.7594	6.4979	5.36	4.6341	-6.5064	9.4457	9.1854	4.1244	4.9741	5.5031
GBMLGG	Tumor	TCGA-S9-A6WI-01	4.34417	3.9487	3.652	3.1781	3.7971	4.5559	4.9232	3.728	5.0268	2.4225	4.6212	3.3364	4.2833	1.8404	2.9167	4.2899	3.0252	-4.035	4.1954	0.5859	2.2603	-1.6394	0.679	5.4253	4.162	2.7868	0.7579	3.4464	5.3709	4.4443	3.2328	3.8788	5.9926	6.2954	5.0268	2.7401	4.5559	4.9232	3.728	-9.9658	8.6149	8.0161	4.8748	5.4206	3.83
GBMLGG	Tumor	TCGA-DB-A64S-01	5.87015	4.2064	3.9002	2.6805	3.4237	4.834	4.9098	4.1069	5.2791	2.8462	4.5723	4.1859	5.4912	2.0707	3.162	4.5832	3.7475	-0.8863	4.9364	0.9419	2.6371	-0.9971	2.3564	5.811	5.3586	2.9674	0.6332	3.4843	5.9355	4.8002	3.3192	3.5124	5.3107	5.537	5.2791	2.6533	4.834	4.9098	4.1069	-9.9658	9.2363	9.0154	4.5123	5.2773	4.6793
GBMLGG	Tumor	TCGA-FG-6692-01	6.96181	3.9393	3.8501	3.0463	4.1161	5.4476	4.9246	3.4945	4.734	2.8681	4.7877	5.1425	5.2832	1.5316	3.287	4.5503	2.9032	1.8996	5.8827	1.0222	3.3047	0.3231	1.5013	6.7964	5.0896	2.5061	1.3397	3.7888	7.1566	5.2899	3.0145	3.4817	5.899	5.0981	4.734	2.5338	5.4476	4.9246	3.4945	-9.9658	9.5279	9.1576	3.6289	5.0666	5.5641
[truncated: 11,510 more rows]

## Sheet: Immune-checkpoint
				Inhibitory	Inhibitory	Inhibitory	Inhibitory	Inhibitory	Inhibitory	Inhibitory	Inhibitory	Inhibitory	Inhibitory	Inhibitory	Inhibitory	Inhibitory	Inhibitory	Inhibitory	Inhibitory	Inhibitory	Inhibitory	Inhibitory	Inhibitory	Inhibitory	Inhibitory	Inhibitory	Stimulaotry	Stimulaotry	Stimulaotry	Stimulaotry	Stimulaotry	Stimulaotry	Stimulaotry	Stimulaotry	Stimulaotry	Stimulaotry	Stimulaotry	Stimulaotry	Stimulaotry	Stimulaotry	Stimulaotry	Stimulaotry	Stimulaotry	Stimulaotry	Stimulaotry	Stimulaotry	Stimulaotry	Stimulaotry	Stimulaotry
[truncated: 11,880 more rows]
[truncated: 14 more columns]

[truncated: 3 more sheets: MSI, TMB, Cibersort]
